# Supplementary material for: Targeting RAS-driven human cancer cells with antibodies to upregulated and essential cell-surface proteins
Source: eLife. 2018 Jan 23;7:e31098. doi: 10.7554/eLife.31098 (PMC5796798; doi:10.7554/eLife.31098)
Supplement: Supplementary file 1. [file elife-31098-supp1.xls]

## Sheet: Supplementary file 1
Gene	log2 Fold Change (H/L) (KRASG12V/Empty Vector)	p-value
ABCC1	0.649462	0.015625
ABCC3	1.59789	0.25
ACP2	-1.49911	0.5
ACSL3	-1.27997	0.5
ADAM10	-0.0651865	1
ADAM15	0.404062	0.625
ADAM17	0.11709	0.46875
ALCAM	0.0198562	0.00215904
ANO6	0.431644	0.25
ANPEP	2.0826	5.87e-22
ANTXR1	1.34222	0.0625
ANXA2	-0.977212	0.375
APMAP	-0.795281	0.125
AREG	0.00878208	0.25
ASPH	0.365751	0.3125
ATP1A1	0.655173	0.000850677
ATP1B1	0.966107	0.00474548
ATP1B3	0.588145	0.0319195
ATP2A2	-0.708445	0.3125
ATP6AP1	-1.07611	0.0625
ATRN	0.134771	1
B4GALT3	-0.0772037	0.875
BSG	0.70917	1.91e-06
BST2	0.73976	0.5
BTN2A1	1.04522	0.125
BTN3A3	0.7477	0.125
C1orf159	0.38299	0.625
CANX	0.386833	1
CD109	-0.330362	9.6e-06
CD151	0.990269	0.000488281
CD276	0.145811	0.216167
CD44	0.596222	0.130859
CD46	0.612334	0.0124512
CD47	0.650816	0.00335693
CD55	2.40737	0.5
CD58	1.18842	0.0078125
CD59	0.743512	0.25
CD63	-0.311791	0.0011304
CD70	0.22317	0.625
CD82	-2.57191	0.00390625
CD97	0.932168	0.0078125
CDCP1	1.01005	2.17e-06
CDH13	1.25553	1.87e-07
CDH2	1.44671	0.00854492
CDH3	-1.53891	0.0625
CDH4	-0.868925	0.109375
CELSR1	0.348944	0.125
CHST3	-1.9479	0.0625
CLCA2	-3.17102	0.00012207
CLDND1	0.582243	0.25
CLMP	1.21059	0.00170898
CLPTM1	-1.67351	0.0078125
CNNM4	0.784364	0.03125
CNTNAP1	0.521825	0.3125
CPD	-0.112593	0.25
CXADR	-0.435471	0.0625
DCBLD1	0.994474	0.109375
DIAPH1	1.31199	0.5
DSG2	2.12776	0.000976563
DSG3	-1.70055	0.0625
ECE1	0.768838	0.46875
EFNB1	-0.129589	0.375
EFNB2	1.48063	0.0625
EGFR	-0.237919	0.00610352
EMB	0.281862	0.546875
EMP1	0.207351	0.625
EMP3	1.35921	0.00390625
EPCAM	-0.745565	0.0625
EPHA2	0.514271	0.0546875
ERMP1	-0.92261	0.25
EXTL3	-1.10664	0.125
F11R	-1.34132	0.25
F3	-1.66275	0.000976563
FAM174A	-1.85338	0.5
FAM20B	-0.962242	0.0625
FAP	-1.66978	0.03125
FAS	0.229895	0.84375
FAT1	-0.87199	0.078125
FAT2	-2.27944	0.03125
GALNT10	-0.660956	0.125
GALNT2	-1.72489	0.25
GALNT3	-1.83423	0.00195312
GLG1	-0.982757	3.05e-05
GNPTAB	-1.42408	3.05e-05
GOLM1	-0.531829	0.25
GPC1	0.0872083	0.4375
GPR107	-1.53874	0.125
GPR126	1.18	0.015625
GPR39	1.09001	0.0625
GPR56	-3.81898	0.25
ICAM1	1.57013	0.000976563
ICAM5	1.28925	0.09375
IGF1R	-1.26588	0.015625
IGF2R	-0.0489923	0.413086
IKBIP	-1.09611	0.0078125
IMPAD1	-1.28329	0.125
ITFG3	0.0807311	0.322266
ITGA1	0.683141	0.0537109
ITGA10	1.13982	0.21875
ITGA2	-0.164323	0.000646785
ITGA3	1.15245	7.86e-10
ITGA5	1.7332	1.3e-08
ITGA6	-0.872577	4.38e-07
ITGAV	0.0850578	0.0539311
ITGB1	0.964151	1.04e-13
ITGB4	-0.911173	0.000488281
ITGB5	1.6926	0.00390625
ITGB6	-2.80168	0.000976563
JKAMP	0.597408	1
KIAA1161	-0.570588	0.25
KIRREL	0.890733	0.125
KRT1	-1.8568	7.45e-09
L1CAM	-2.86412	0.0625
LAMA3	-2.31479	0.015625
LAMC1	-0.964885	0.015625
LAMP1	-1.71448	1.49e-08
LAMP2	-1.42078	0.000522614
LDLR	0.444388	0.303795
LMAN2	-1.15552	0.03125
LNPEP	-0.030198	0.375
LRP1	2.92237	6.1e-05
LRRC59	-1.41713	0.5
LRRC8A	0.958472	0.5
LYPD3	-0.259167	0.5
M6PR	-0.623993	0.0136719
MBTPS2	-0.822991	0.125
MCAM	2.57524	0.00195312
MET	-0.281114	0.0134277
MFAP3	-0.0541038	0.5
MFI2	0.19762	0.4375
MICA	0.233049	0.8125
MPPE1	-1.48087	0.125
MPZL1	0.324988	0.738091
MST1R	-1.00627	0.00195312
NCSTN	-0.0155584	0.0335388
NEO1	0.733403	0.700195
NOMO3	-0.703147	0.0078125
NPC1	-0.450793	0.0215454
NPTN	0.735611	0.000161883
NRP1	1.97864	0.03125
NT5E	1.77129	7.28e-12
OSMR	1.36073	0.000976563
PANX1	1.14911	0.25
PIEZO1	1.13296	0.125
PLAUR	0.90553	0.0078125
PLXNB2	0.787885	0.00266212
PODXL	1.32499	0.5
PON2	-0.298178	0.128906
PRNP	0.72409	0.0322266
PROCR	0.427833	1
PTGFRN	1.10087	8.17e-06
PTK7	0.588911	0.0275354
PTPRG	1.15543	0.000488281
PTPRM	1.60445	0.03125
PVR	0.189031	1
PVRL1	-1.53305	0.015625
PVRL3	2.09246	0.046875
QSOX2	-0.385103	0.15625
RNF149	0.149872	1
ROBO1	1.00795	0.5
RPN1	-0.641996	0.125
RPN2	-0.0786946	0.078125
RTN4R	-0.6917	0.4375
SCARB1	0.26723	0.623094
SCARB2	-0.754404	6.99e-05
SLC12A2	0.784866	0.03125
SLC12A4	-0.638136	0.25
SLC1A3	-0.520067	0.25
SLC1A4	1.0018	0.0625
SLC1A5	0.635584	0.382812
SLC22A5	0.361277	0.15625
SLC25A11	0.398591	0.5
SLC26A2	1.57787	3.64e-12
SLC29A1	0.072789	0.078125
SLC30A1	0.727253	0.5
SLC38A1	0.406568	0.375
SLC39A10	0.914887	0.0322266
SLC39A14	0.476942	0.0117188
SLC39A6	0.604549	0.00823212
SLC3A2	-1.10105	7.11e-15
SLC43A3	0.56498	0.4375
SLC44A2	0.801145	0.125
SLC4A7	0.855058	0.00805664
SLC5A3	0.847733	0.25
SLC6A15	1.5006	0.015625
SLC6A8	0.884152	0.125
SLC7A1	1.74699	0.5
SLC7A5	-1.78767	0.0625
SLCO4A1	2.55524	0.125
SSR1	0.223883	0.845703
SSR2	-1.17683	0.125
ST14	-2.12585	0.125
ST3GAL1	-1.4696	0.0625
ST3GAL4	-1.55012	0.0625
STOM	-0.193882	0.015625
STT3A	-1.39117	0.0625
STT3B	-0.378374	0.25
SUSD5	2.38262	0.5
SYPL1	0.0506098	0.0546875
TACSTD2	-2.41443	0.03125
TFRC	-0.32603	0.0625
TGFBR2	1.88403	0.25
THBD	1.97692	0.25
TM2D3	-0.152821	0.375
TM9SF3	-1.31928	0.125
TMCO3	-0.461748	0.03125
TMED4	-0.894854	0.25
TMED7	-0.839417	0.015625
TMED9	-1.14303	0.125
TMEM2	0.30214	0.8125
TMEM30A	0.580598	0.0136719
TMEM62	-0.14453	0.375
TMEM87A	-1.0968	6.1e-05
TMEM9	-0.91732	0.125
TMX3	-2.00745	0.25
TOR1AIP2	-1.14875	0.125
TPBG	1.08948	0.000152588
TSPAN1	-1.72415	0.015625
TSPAN3	-0.650842	0.00515747
TTYH3	-0.300691	0.125
