# Supplementary material for: Targeting RAS-driven human cancer cells with antibodies to upregulated and essential cell-surface proteins
Source: eLife. 2018 Jan 23;7:e31098. doi: 10.7554/eLife.31098 (PMC5796798; doi:10.7554/eLife.31098)
Supplement: Supplementary file 2. [file elife-31098-supp2.xls]

## Sheet: Supplementary file 2
Gene	log2 Fold Change (H/L) (MEKi/Vehicle)	p-value
ABCA8	0.628859	0.125
ACP2	1.5048	0.015625
ADAM15	0.703167	0.0546875
ADAM17	-0.320463	0.1875
ADAM9	-0.958251	1
ALCAM	0.994049	5.82e-10
ANO6	-0.197112	0.3125
ANPEP	-0.0980011	0.707088
ANTXR1	0.637458	0.1875
APLP2	0.356239	0.25
APMAP	1.00678	0.125
ASPH	-0.0897146	0.640625
ATP1A1	1.08988	0.5
ATP1B1	0.934819	3.81e-06
ATP1B3	-1.10285	0.00195312
ATP6AP1	0.559184	0.0625
ATRN	-0.0243618	0.375
BSG	-0.944654	0.00146484
BST2	0.223337	0.300781
BTD	1.05143	0.0625
BTN2A1	-0.397822	0.625
BTN3A3	-1.21257	0.5
CASC4	0.363628	0.3125
CD109	0.356794	0.000827849
CD14	-1.9985	0.125
CD151	-0.0666244	1
CD276	-1.36039	6.1e-05
CD44	-1.46414	0.000976563
CD46	0.262833	0.00341797
CD47	0.204371	0.00195312
CD55	0.427273	1
CD58	-0.652564	0.3125
CD59	-0.0887238	0.75
CD63	0.528239	8.8e-05
CD68	0.0231022	1
CD70	-0.754818	0.25
CD97	-1.05906	0.00805664
CDC42	-0.423339	0.5
CDCP1	-1.42687	3.81e-05
CDH13	0.408266	0.00106452
CDH2	-0.0797306	0.495422
CELSR1	0.154438	0.4375
CELSR2	0.964495	0.03125
CERS2	0.421849	0.5
CLDND1	-1.10447	0.5
CLMP	-0.642118	0.00195312
CLPTM1	0.556867	0.03125
CLPTM1L	0.403577	0.5
CNNM4	-1.08836	0.015625
CNTN3	-0.46359	0.146484
CNTNAP1	1.0873	0.000976563
CPD	-0.431642	0.0522461
CPM	2.22331	0.25
DCBLD1	-0.374939	0.25
DCBLD2	-0.521547	0.375
DSG2	-0.126505	1
ECE1	-0.0841868	0.8125
EGFR	-1.32983	0.00488281
EMB	-1.34326	0.0625
EMP3	0.00857133	0.382812
ENPP1	0.251439	0.625
EPHA2	-1.16611	0.125
EPHB4	-0.329944	0.75
F11R	-0.231711	0.75
FAS	-1.06246	0.03125
FASN	-0.999401	0.0390625
FLRT3	1.28579	0.25
GGT5	0.0103741	0.84375
GLG1	0.881596	6.1e-05
GNPTAB	1.04996	0.000976563
GOLM1	0.862777	0.5
GPC1	1.01735	0.015625
GPNMB	3.71709	0.000579834
GPR107	0.378553	1
GPR39	-0.3391	0.125
HGSNAT	1.34451	0.5
ICAM1	-1.42848	0.000488281
IGF2R	0.443846	0.00976562
IGSF8	-0.542422	0.15625
IMPAD1	0.585229	0.125
ITFG3	0.694289	0.00610352
ITGA1	-0.0476189	0.96582
ITGA10	-1.37673	0.00976562
ITGA2	-2.93654	6.1e-05
ITGA3	-1.17148	1.59e-12
ITGA5	-1.01211	6.68e-06
ITGA6	-0.685648	0.00671387
ITGAV	-0.848897	2.01e-06
ITGB1	-1.15571	9.09e-14
ITGB4	-0.154979	0.625
ITGB5	-1.33946	0.000976563
KIRREL	-0.606448	0.03125
KRT1	-4.36696	0.125
LAMA5	0.645266	0.4375
LAMB1	0.273181	0.3125
LAMC1	0.825414	0.0102539
LAMP1	1.42718	1.86e-08
LAMP2	1.27609	0.00628662
LDLR	-1.46534	0.5
LMAN2	0.665596	0.00390625
LMAN2L	0.142552	0.5
LNPEP	-0.90432	0.0195312
LRP1	-1.19691	1.78e-13
LYPD3	-0.367709	0.5
M6PR	-0.171653	0.945312
MAN2A1	0.502463	0.25
MAN2A2	0.869428	0.5
MCAM	0.37124	0.375
MCOLN1	1.7595	0.25
MET	0.677429	0.25
MFGE8	0.981774	0.5
MFI2	0.599467	0.03125
MICA	0.201946	0.0625
MME	2.02451	0.03125
MPZL1	0.614261	0.0234375
MRC2	-0.650848	0.25
MSLN	2.9102	0.0488281
MST1R	-0.934003	0.25
NCEH1	0.675048	0.5
NCSTN	0.572051	0.00292969
NEO1	-0.607519	0.0976562
NOMO3	1.02302	0.0625
NPC1	1.45292	3.81e-06
NPTN	-0.317032	0.0310127
NT5E	-0.296778	0.17627
OSMR	-0.545336	0.09375
OSTM1	2.48982	0.25
PCDH9	1.68733	0.1875
PIEZO1	-0.804314	0.578125
PIGG	-0.833214	1
PLXNB2	-0.127578	0.463381
PODXL	-0.76055	0.5
PON2	0.98296	0.0078125
PPAP2C	-0.358404	0.625
PRNP	0.0602954	0.423828
PROCR	-0.539547	0.0625
PSCA	2.0311	0.0625
PTGFRN	-0.95163	4.53e-06
PTK7	0.078192	0.00322914
PTPRG	-0.463123	0.120544
PTPRK	0.340848	0.203613
PTPRM	0.120964	0.159058
PVR	0.161254	1
PVRL3	-0.409506	0.125
QSOX2	0.124964	0.25
RPN1	-0.401965	1
RPN2	-0.0975218	1
SCARB1	0.0340847	0.5
SCARB2	1.37116	9.54e-07
SCNN1B	1.31736	0.25
SEL1L	0.637879	0.03125
SIDT2	-0.567282	0.625
SLC12A2	-1.33667	0.5
SLC12A6	1.27713	0.75
SLC15A4	0.911059	0.5
SLC17A5	2.47472	0.5
SLC1A4	-1.31852	0.25
SLC1A5	-1.23044	0.25
SLC22A5	2.26552	0.0078125
SLC25A11	-1.3675	0.5
SLC26A2	-0.760955	0.00152941
SLC29A1	0.432564	0.0625
SLC2A1	-0.758588	0.25
SLC38A1	-1.83486	0.5
SLC39A10	-1.71911	0.0625
SLC39A14	-0.37599	0.128906
SLC39A6	-1.02754	0.00390625
SLC3A2	-0.119584	0.728506
SLC43A3	-1.03189	0.25
SLC44A2	3.80413	0.03125
SLC45A4	-2.41703	0.5
SLC4A7	-0.81514	0.03125
SLC5A3	-1.32263	0.0625
SLC6A15	-2.76051	0.00390625
SLC6A8	-1.36608	0.5
SLC7A1	-2.19045	0.5
SLC7A2	-1.25242	0.5
SLC9A9	-0.396408	0.75
SLCO3A1	-0.636181	0.5
SLCO4A1	-1.43903	0.25
SPPL2A	1.11845	0.5
SSR1	0.156527	0.4375
SSR2	0.447827	0.25
ST3GAL1	0.307296	0.625
STOM	1.44354	0.0078125
STT3A	0.427043	0.078125
STT3B	0.386145	0.3125
SUSD2	0.73736	0.296875
SUSD5	0.25996	0.5
SYPL1	0.130256	0.03125
TACSTD2	1.85064	0.125
TFRC	-0.237139	0.275391
TGFBR2	-1.05752	0.1875
THBD	-2.11689	0.25
TLR3	1.06028	0.0839844
TM2D1	0.0723453	0.75
TM9SF3	0.454131	0.25
TMED4	0.827909	0.5
TMED7	0.828378	0.03125
TMED9	0.51861	0.25
TMEM179B	1.81785	0.25
TMEM206	-1.71641	0.25
TMEM231	0.270313	0.5
TMEM245	0.939527	0.5
TMEM30A	-0.703764	0.015625
TMEM87A	1.18498	0.105469
TMX3	0.100965	0.625
TPBG	-1.13471	1.53e-05
TSPAN3	0.605446	0.0128632
TSPAN4	-0.193981	0.75
TTYH3	0.681797	0.75
UST	1.04081	0.25
