# Supplementary material for: Targeting RAS-driven human cancer cells with antibodies to upregulated and essential cell-surface proteins
Source: eLife. 2018 Jan 23;7:e31098. doi: 10.7554/eLife.31098 (PMC5796798; doi:10.7554/eLife.31098)
Supplement: Supplementary file 3. [file elife-31098-supp3.xls]

## Sheet: Supplementary file 3
Gene	log2 Fold Change (H/L) (AKTi/Vehicle)	p-value
ACP2	0.0383236	1
ADAM15	-0.390631	0.375
ADAM17	0.154155	0.25
ALCAM	1.39742	9.31e-10
ANO6	0.0161025	0.84375
ANPEP	-0.195409	0.00110007
ANTXR1	0.77854	0.078125
APMAP	-0.172649	0.625
ATP1A1	0.59809	1
ATP1B1	-0.233296	0.00239945
ATP1B3	-0.0281945	0.96582
ATP6AP1	-0.516131	0.3125
ATRN	-0.16314	0.5
BSG	-0.292993	0.00524902
BST2	-0.882566	0.3125
BTN2A1	-0.0718677	0.8125
BTN3A3	-2.08033	0.25
CD109	0.707558	3.58e-07
CD14	-1.9959	0.125
CD151	0.611815	1
CD276	0.0242998	0.899933
CD44	0.174585	0.123047
CD46	0.222084	0.109863
CD47	0.401187	0.0107422
CD55	0.956915	0.5
CD58	-0.238114	0.578125
CD59	-0.428289	0.25
CD63	0.841223	4.47e-08
CD70	-1.1198	0.0625
CD97	-0.203458	0.190918
CDCP1	0.104438	0.781906
CDH13	0.988587	8.34e-07
CDH2	0.123038	0.637695
CDH4	0.0118642	0.875
CELSR1	-0.502169	0.25
CELSR2	0.251261	1
CLDND1	0.244712	1
CLMP	-0.971465	0.046875
CLPTM1	-0.154119	0.5
CLPTM1L	-0.650106	0.5
CNNM4	-0.17816	0.0625
CNTN3	-1.29805	0.000244141
CNTNAP1	-1.78677	0.03125
CPD	0.0746287	0.742188
CXADR	-0.237656	0.75
DSG2	0.525944	0.015625
ECE1	0.696172	0.0625
EGFR	0.677502	0.00012207
EMB	0.445717	0.25
EMP3	-0.102018	0.15625
EPHA2	0.348184	0.125
F11R	-0.267742	0.5
F3	0.215434	0.75
FAP	4.43446	0.0625
FAS	-1.43923	0.03125
FASN	-1.36057	0.03125
GLG1	0.599967	0.0803223
GNG12	-0.348111	0.5
GNPTAB	1.24513	0.00195312
GOLM1	0.570099	0.5
GPNMB	1.12633	0.9375
GPR39	0.215135	0.21875
HGSNAT	-0.0376091	0.5
ICAM1	-0.0723434	0.233398
IGF2R	1.29365	0.0341797
IGSF8	-1.03881	0.125
IMPAD1	0.290352	0.25
ITFG3	0.248224	0.460938
ITGA1	-1.08335	0.125
ITGA10	-1.65692	0.00195312
ITGA2	0.624046	3.81e-06
ITGA3	0.160416	0.0218557
ITGA5	-0.507897	0.000551701
ITGA6	-0.0197676	0.733398
ITGAV	-0.197943	0.0022483
ITGB1	-0.114404	0.000736819
ITGB4	0.494972	0.25
ITGB5	0.100326	0.488708
KIAA1161	1.21562	0.125
KIRREL	-0.0959478	0.1875
KRT1	-3.72574	0.0625
LAMA5	0.198221	0.625
LAMC1	0.316233	0.3125
LAMP1	0.324799	0.126648
LAMP2	0.323043	0.00805664
LDLR	0.383054	1
LMAN2	0.154943	0.3125
LNPEP	0.605379	0.0215454
LRP1	-0.512424	1.28e-06
LRRC8A	-0.157359	1
M6PR	0.892087	0.546875
MAN2A2	-0.340951	0.5
MCAM	-1.57707	0.015625
MICA	1.30144	0.0625
MME	0.785979	0.125
MPPE1	0.0691979	1
MPZL1	-0.278139	0.0625
MRC2	0.579606	0.5
MSLN	0.198715	0.875
MST1R	-0.557615	0.25
NA	-0.473908	0.15625
NCSTN	-0.317376	0.84375
NEO1	-1.01636	0.00390625
NOMO3	0.239332	0.75
NPC1	1.12957	6.1e-05
NPTN	-0.364964	0.0505856
NRP1	1.87583	0.0625
NT5E	1.4185	5.72e-06
NUP210	-0.28604	0.625
OSMR	-1.05232	0.03125
PIEZO1	-0.133788	0.382812
PLAUR	0.743212	0.078125
PLXNB2	0.0251905	0.66168
PODXL	0.160116	0.875
PON2	0.387022	0.195312
PPAP2C	-0.651343	0.25
PRNP	0.00807624	1
PROCR	-0.119469	0.84375
PSCA	1.12424	0.625
PTGFRN	-0.943806	1.53e-05
PTK7	-0.38126	0.00914621
PTPRG	-0.907341	0.00012207
PTPRK	0.0283066	1
PTPRM	-0.28322	0.0771484
PVR	0.000602609	0.5
PVRL3	0.170327	0.625
RPN1	-0.140363	0.5
SCARB1	0.149409	0.5
SCARB2	0.069289	1
SEL1L	-0.0541082	0.625
SEL1L3	-0.369636	0.5
SEMA4D	0.232829	0.375
SLC12A2	-0.407847	0.5
SLC15A4	-0.0382297	0.5
SLC1A4	-0.264218	0.5
SLC1A5	-0.530399	0.125
SLC22A5	-0.900111	0.078125
SLC26A2	-0.853309	2.01e-05
SLC29A1	1.93004	0.0625
SLC2A1	0.874028	0.5
SLC38A1	0.50367	0.5
SLC39A10	-0.340558	0.109375
SLC39A14	-0.375329	0.0273438
SLC39A6	-0.51551	0.0245361
SLC3A2	-0.309737	0.00169373
SLC43A3	-0.524519	0.125
SLC44A2	1.57845	0.5
SLC45A4	0.0700283	1
SLC4A7	1.31839	0.00390625
SLC6A15	1.41154	0.0078125
SLC6A8	-0.840748	0.5
SLC7A1	-0.108271	0.5
SLC7A2	0.289819	1
SLCO4A1	-0.949663	0.5
SLITRK4	0.827593	0.03125
SPPL2A	0.172257	1
SSR1	-0.296358	0.75
SSR2	-0.0570205	0.625
STOM	0.338643	1
STT3A	-0.295416	0.046875
STT3B	-0.497954	0.0625
SUSD2	-0.181911	0.625
SYPL1	-0.165788	0.4375
TFRC	0.574154	0.0839844
TGFBR2	-0.495284	0.587937
THBD	-0.449958	0.5
TLR3	0.581015	1
TM9SF3	-0.157378	1
TMED7	0.768399	0.03125
TMEM179B	0.349991	0.25
TMEM206	0.566697	0.5
TMEM30A	0.00573209	0.6875
TMEM87A	-0.570063	0.375
TMX3	-0.411738	0.25
TPBG	-0.0719812	0.0576782
TSPAN3	0.187659	0.0268555
TSPAN4	-0.547774	0.5
