# Supplementary material for: Targeting RAS-driven human cancer cells with antibodies to upregulated and essential cell-surface proteins
Source: eLife. 2018 Jan 23;7:e31098. doi: 10.7554/eLife.31098 (PMC5796798; doi:10.7554/eLife.31098)
Supplement: Supplementary file 4. [file elife-31098-supp4.xls]

## Sheet: Supplementary file 4
Gene	log2 Fold Change (H/L) (EGFRi/Vehicle)	p-value
ABCC3	0.151932	0.625
ADAM15	1.52439	0.1875
ADAM17	-0.202509	0.625
ALCAM	1.62555	3.54e-08
ANO6	-0.073343	0.578125
ANPEP	0.0803976	0.0278928
ANTXR1	0.413784	0.03125
ASPH	0.298973	1
ATP1A1	-1.01582	0.00195312
ATP1B1	-0.0760856	0.441334
ATP1B3	-0.409507	0.0214844
BSG	-0.216654	0.00976562
BST2	0.54349	0.1875
BTN2A1	-0.642208	0.75
BTN3A3	-1.47689	0.25
CADM3	1.67711	0.0625
CD109	0.910936	9.54e-06
CD151	-0.151744	0.125
CD276	-0.416157	0.3396
CD44	-0.295315	0.0341797
CD46	0.0362148	1
CD47	0.305878	0.0266113
CD55	-0.684069	0.5
CD58	-0.394024	0.0625
CD59	-0.201462	0.5
CD63	0.679054	0.00390625
CD70	0.00332623	0.75
CD97	-0.281301	0.057373
CDCP1	-0.382292	0.00729561
CDH13	0.524913	0.00976562
CDH2	-0.099642	0.3396
CELSR1	0.142491	0.75
CLDND1	-1.35557	0.25
CLMP	-0.615529	0.015625
CNTN3	-0.500585	0.148438
CPD	0.98901	0.21875
CXADR	-0.47932	0.5
DCBLD1	0.0918426	1
DCBLD2	0.625134	0.5
DSG2	-0.221204	0.125
EGFR	-0.612955	0.015625
EMB	-0.149719	0.5
EMP3	0.000833016	0.6875
EPHA2	-0.0499322	1
EPHB4	0.330264	0.5
FAS	-0.325822	0.25
FASN	-0.728503	0.0625
GGT5	1.01966	0.0625
GLG1	0.913866	0.00195312
GPC1	0.91734	0.0625
GPR39	0.279638	1
HLA-C	1.57873	0.625
ICAM1	-0.186479	0.431641
IGSF8	-0.9706	0.125
IL6ST	-0.257012	0.75
IMPAD1	1.01153	0.5
ITFG3	0.545312	0.00195312
ITGA1	0.710451	0.148438
ITGA10	0.469692	0.03125
ITGA2	-0.646249	0.00195312
ITGA3	-0.479856	1.24e-06
ITGA5	-0.848779	4.58e-05
ITGA6	0.156538	0.682714
ITGAV	0.20263	0.00341922
ITGB1	-0.532258	1.14e-09
ITGB4	-0.102353	0.25
ITGB5	0.424182	0.0234375
KIRREL	0.779457	0.1875
KRT1	-3.85484	0.0078125
LAMA5	0.519797	0.125
LAMB1	0.0840197	0.75
LAMC1	-0.00990041	0.75
LAMP1	0.535306	0.00195312
LAMP2	0.213241	0.0625
LMAN2	-0.0410234	1
LNPEP	0.344482	0.1875
LRP1	-0.67645	0.00168991
LRRC8A	-0.153446	0.5
LYPD3	-0.393222	0.5
M6PR	0.0498388	0.875
MCAM	0.633747	0.15625
MICA	0.832294	0.125
MME	0.481211	0.125
MPZL1	-0.415327	0.4375
MRC2	1.60675	0.125
MSLN	1.18011	1
MST1R	-0.286667	0.5
NCSTN	-0.0449799	0.625
NEO1	-0.246542	0.0625
NPTN	-0.445234	0.0260093
NRCAM	-1.36712	0.125
NRP1	0.347543	0.5
NT5E	0.623148	2.29e-05
OSMR	-1.05654	0.0625
PIEZO1	0.517669	0.5
PLXNB1	-0.216077	1
PLXNB2	-0.0680505	0.601046
PODXL	-0.40237	0.5
PON2	0.0316128	0.8125
PPAP2C	0.0654757	1
PRNP	0.305735	0.015625
PROCR	-0.341902	0.25
PTGFRN	-0.60091	0.00336456
PTK7	0.145123	0.303816
PTPRG	-0.091704	0.454285
PTPRK	0.371263	0.375
PTPRM	-0.126199	0.164062
PVR	-0.159974	1
PVRL1	-0.129558	1
SCARB1	0.150346	1
SEMA4D	1.54359	0.125
SLC12A2	-0.19103	0.125
SLC1A5	-0.477804	0.25
SLC22A5	0.410153	0.15625
SLC23A2	0.478168	1
SLC25A3	1.22359	0.5
SLC26A2	0.153035	0.0266418
SLC29A1	1.00298	0.0625
SLC2A1	-0.34974	0.25
SLC38A1	-0.906716	0.5
SLC39A10	-1.00963	0.0546875
SLC39A14	0.230603	0.625
SLC39A6	-0.300984	0.0424805
SLC3A2	-0.40472	0.00141144
SLC43A3	0.0788694	0.625
SLC44A2	2.65878	0.25
SLC45A4	0.286371	1
SLC4A7	-0.825614	0.0195312
SLC5A3	-0.737061	0.0625
SLC6A15	-0.899671	0.0625
SLC7A1	-4.80469	0.5
SLC7A2	0.542998	1
SLCO3A1	-0.199417	0.5
SLCO4A1	-0.539789	0.5
SLITRK4	-0.827941	0.03125
STOM	1.52335	0.0625
STT3A	-0.557537	0.625
STT3B	-0.14027	0.1875
SUSD2	2.62628	0.0078125
SYPL1	-0.0452932	0.8125
TENM3	-0.325092	1
TFRC	0.992142	0.00390625
TGFBR2	0.215221	0.4375
THBD	-2.31207	0.125
TM9SF3	0.429569	1
TMED7	0.788455	0.5
TMED9	-0.0346185	0.5
TMEM30A	-0.845958	0.0625
TMX3	-0.473156	0.5
TPBG	-0.2364	0.495422
TSPAN3	-0.00197002	0.9375
TSPAN4	-0.0670413	1
