# Supplementary material for: Targeting RAS-driven human cancer cells with antibodies to upregulated and essential cell-surface proteins
Source: eLife. 2018 Jan 23;7:e31098. doi: 10.7554/eLife.31098 (PMC5796798; doi:10.7554/eLife.31098)
Supplement: Supplementary file 5. [file elife-31098-supp5.xlsx]

## Sheet: Sheet1
Gene	FPKM Puro	FPKM KRAS G12V	log2 fold	statistic	pval	qval	significant
SPRR1B	2.07516	0	-infinity	#NAME?	5e-05	0.000969808	yes
LAD1	6.58034	0	-infinity	#NAME?	5e-05	0.000969808	yes
KRT13	9.46323	0	-infinity	#NAME?	5e-05	0.000969808	yes
FXYD3	12.9962	0	-infinity	#NAME?	5e-05	0.000969808	yes
ESM1	0.375277	44.6796	6.89551	12.8093	5e-05	0.000969808	yes
ELTD1	0.0368992	3.92364	6.73246	1.78119	5e-05	0.000969808	yes
RNF175	0.0807498	6.7026	6.37512	3.40701	5e-05	0.000969808	yes
CHRNA9	1.03647	64.7929	5.96608	12.137	5e-05	0.000969808	yes
GALNT9	0.0866573	4.08163	5.55768	4.21911	5e-05	0.000969808	yes
INHBA	0.217445	7.98991	5.19946	11.6082	5e-05	0.000969808	yes
EGR1	12.6775	325.569	4.68262	19.9732	5e-05	0.000969808	yes
C14orf64	0.410939	9.59418	4.54516	5.38779	5e-05	0.000969808	yes
CYB5R2	0.179047	3.8418	4.42338	6.11013	5e-05	0.000969808	yes
GFPT2	2.51518	53.9253	4.42223	11.3257	5e-05	0.000969808	yes
CES1	2.70208	50.8841	4.23507	11.5888	5e-05	0.000969808	yes
CES1P2	3.19387	58.0541	4.18402	8.84764	5e-05	0.000969808	yes
IL33	1.80296	30.6263	4.08633	13.2506	5e-05	0.000969808	yes
TFPI2	0.903376	15.2268	4.07514	8.35785	5e-05	0.000969808	yes
IL8	25.6416	423.021	4.04417	17.5876	5e-05	0.000969808	yes
LOC149773	0.904412	14.906	4.04277	5.51514	5e-05	0.000969808	yes
ITGAX	0.164973	2.70678	4.03627	5.06304	5e-05	0.000969808	yes
IL1RL1	16.6027	269.911	4.02299	17.2212	5e-05	0.000969808	yes
OR10J1	0.250742	3.87065	3.9483	5.43358	5e-05	0.000969808	yes
NOTCH3	0.384206	5.92982	3.94804	11.8212	5e-05	0.000969808	yes
VGF	0.529234	7.94958	3.9089	10.8195	5e-05	0.000969808	yes
FAM110C	3.47596	51.0561	3.8766	13.3652	5e-05	0.000969808	yes
COL6A3	1.20254	17.3428	3.85017	14.7244	5e-05	0.000969808	yes
AKR1C1,AKR1C2	0.36945	5.32178	3.84846	3.40459	5e-05	0.000969808	yes
GEM	0.254209	3.50441	3.78508	5.71716	5e-05	0.000969808	yes
AKR1C1	40.5753	546.442	3.75139	7.41544	5e-05	0.000969808	yes
RP1	0.713388	8.34976	3.54898	4.76924	5e-05	0.000969808	yes
STC1	2.85134	32.2339	3.49887	12.804	5e-05	0.000969808	yes
AGPAT9	0.776765	8.60765	3.47007	9.17796	5e-05	0.000969808	yes
ADAMTS9	0.293735	3.24579	3.46598	9.62223	5e-05	0.000969808	yes
TMEM71	0.294388	3.24459	3.46224	5.67454	5e-05	0.000969808	yes
SFTPB	0.451807	4.82607	3.41707	6.07111	5e-05	0.000969808	yes
CXCL3	8.45359	87.6652	3.37437	10.6962	5e-05	0.000969808	yes
APCDD1L	0.632826	6.44872	3.34913	8.54594	5e-05	0.000969808	yes
MPP4	0.205673	2.06133	3.32515	4.58779	5e-05	0.000969808	yes
SLC2A3	0.518287	5.05741	3.28657	8.70131	5e-05	0.000969808	yes
INSC	6.68617	63.5122	3.24778	12.0877	5e-05	0.000969808	yes
C10orf90	1.0601	9.97815	3.23457	6.85712	5e-05	0.000969808	yes
NAV3	0.588625	5.54016	3.23451	11.041	5e-05	0.000969808	yes
ESRG	0.461643	4.31952	3.22602	5.6952	5e-05	0.000969808	yes
AKAP12	16.4585	152.558	3.21245	13.9773	5e-05	0.000969808	yes
ADAM12	2.07474	18.8245	3.18161	9.83438	5e-05	0.000969808	yes
DUSP6	14.5863	129.81	3.15372	13.3465	5e-05	0.000969808	yes
STEAP1	7.69263	66.0319	3.10161	11.0203	5e-05	0.000969808	yes
PI3	1.47889	12.4792	3.07694	5.91175	5e-05	0.000969808	yes
NR4A1	1.56717	13.1506	3.06889	7.49635	5e-05	0.000969808	yes
KRAS	14.2301	118.652	3.05972	13.5086	5e-05	0.000969808	yes
NGEF	1.47366	12.2279	3.0527	9.85121	5e-05	0.000969808	yes
PTPN22	1.42424	11.6137	3.02756	4.49746	5e-05	0.000969808	yes
LIF	2.96415	24.1455	3.02606	11.7163	5e-05	0.000969808	yes
ANXA10	0.590039	4.72062	3.00009	5.85504	5e-05	0.000969808	yes
TIMP1	596.808	4748.62	2.99217	12.051	5e-05	0.000969808	yes
IGSF9B,LOC283174	2.0048	15.7803	2.9766	9.65463	5e-05	0.000969808	yes
CSF3	45.328	352.778	2.96028	12.6932	5e-05	0.000969808	yes
SH2D2A	4.10919	31.2827	2.92844	9.17355	5e-05	0.000969808	yes
TNIP3	0.439833	3.3416	2.92551	4.91732	5e-05	0.000969808	yes
CXCL3	0.717822	5.16819	2.84796	3.95611	5e-05	0.000969808	yes
GRAMD1B	0.66768	4.70442	2.81679	7.58683	5e-05	0.000969808	yes
RAB31	0.954123	6.70626	2.81326	8.63907	5e-05	0.000969808	yes
SPRY4	11.3628	79.5833	2.80815	11.9458	5e-05	0.000969808	yes
ADAM19	0.790021	5.35077	2.75978	9.36827	5e-05	0.000969808	yes
FLJ42351	1.55779	10.1299	2.70105	6.64313	5e-05	0.000969808	yes
TREM1	0.977556	6.35508	2.70066	7.29657	5e-05	0.000969808	yes
FMN2	1.59126	10.3196	2.69715	7.6535	5e-05	0.000969808	yes
TMEM158	2.07384	13.3438	2.68579	8.24967	5e-05	0.000969808	yes
FAM20C	31.1129	198.309	2.67216	10.9558	5e-05	0.000969808	yes
FRY	1.58354	9.81859	2.63236	5.95292	5e-05	0.000969808	yes
MAN1A1	0.862718	5.33024	2.62724	8.10967	5e-05	0.000969808	yes
DMRTA1	0.635191	3.90614	2.62048	4.21063	5e-05	0.000969808	yes
NTSR1	0.742319	4.54174	2.61313	4.2627	5e-05	0.000969808	yes
ITPKA	1.28963	7.82177	2.60054	5.65265	5e-05	0.000969808	yes
CD55	72.4385	438.803	2.59874	10.8704	5e-05	0.000969808	yes
ALOX12B,ALOXE3	1.35084	8.17938	2.59814	6.98374	5e-05	0.000969808	yes
FLJ22447	0.608664	3.65674	2.58684	4.44351	5e-05	0.000969808	yes
RGS17	3.40256	20.3119	2.57763	6.02981	5e-05	0.000969808	yes
IER3	46.8807	275.4	2.55446	11.2746	5e-05	0.000969808	yes
PITPNC1	13.2884	77.3987	2.54214	9.32834	5e-05	0.000969808	yes
DDX10	16.577	95.7822	2.53058	8.84495	5e-05	0.000969808	yes
TSPAN5	2.8092	15.8824	2.4992	8.82962	5e-05	0.000969808	yes
IL1B	14.8787	82.8506	2.47726	9.88496	5e-05	0.000969808	yes
FAM196B	0.950444	5.20501	2.45323	7.82408	5e-05	0.000969808	yes
FOS	26.7058	145.764	2.44841	10.5893	5e-05	0.000969808	yes
SMOC1	11.29	59.8646	2.40666	8.3528	5e-05	0.000969808	yes
EREG	9.33937	49.324	2.40089	10.2973	5e-05	0.000969808	yes
MAP4K4	0.710184	3.71726	2.38798	3.70487	5e-05	0.000969808	yes
DOCK4	0.764984	3.99209	2.38364	8.34535	5e-05	0.000969808	yes
GK	1.6129	8.40519	2.38162	6.77869	5e-05	0.000969808	yes
FBXO39	0.455505	2.36903	2.37876	3.34948	5e-05	0.000969808	yes
GPR77	0.709687	3.68648	2.37699	5.77343	5e-05	0.000969808	yes
THBD	9.93485	51.2771	2.36774	10.0525	5e-05	0.000969808	yes
SAMSN1	2.41277	12.3731	2.35845	7.56552	5e-05	0.000969808	yes
MARCO	0.38805	1.97302	2.34609	2.79228	5e-05	0.000969808	yes
CLEC2B	1.33462	6.64362	2.31554	6.53263	5e-05	0.000969808	yes
PODXL	2.09544	10.3395	2.30284	8.50189	5e-05	0.000969808	yes
STEAP2	1.93049	9.51609	2.3014	4.71998	5e-05	0.000969808	yes
GPR77	1.38743	6.82842	2.29914	6.22709	5e-05	0.000969808	yes
NT5E	60.3048	292.412	2.27766	9.78235	5e-05	0.000969808	yes
DUSP5	12.3935	59.5933	2.26557	8.97348	5e-05	0.000969808	yes
SLC7A8	1.65005	7.89107	2.25771	5.19162	5e-05	0.000969808	yes
IL6	0.678698	3.19469	2.23483	3.47853	5e-05	0.000969808	yes
PHLDA1	15.6631	73.6388	2.2331	9.81369	5e-05	0.000969808	yes
PRDM8	1.15192	5.37567	2.2224	5.1014	5e-05	0.000969808	yes
MCL1	166.812	769.913	2.20647	9.51149	5e-05	0.000969808	yes
EMR2	0.7828	3.53301	2.17418	4.93681	5e-05	0.000969808	yes
C12orf39	5.48396	24.6912	2.17071	7.78195	5e-05	0.000969808	yes
VLDLR	0.423625	1.86577	2.13891	3.87199	5e-05	0.000969808	yes
ARRB1	0.557657	2.45373	2.13753	7.12425	5e-05	0.000969808	yes
CDCP1	20.0769	87.5321	2.12427	9.21592	5e-05	0.000969808	yes
MT1L	57.9103	251.816	2.12047	8.33797	5e-05	0.000969808	yes
CHAC1	1.02634	4.39732	2.09912	5.43899	5e-05	0.000969808	yes
LOC728192	5.83632	24.9927	2.09837	6.54973	5e-05	0.000969808	yes
MAP4K4	68.6103	292.306	2.09098	7.82596	5e-05	0.000969808	yes
CORO2B	0.422765	1.79211	2.08373	4.94364	5e-05	0.000969808	yes
HS3ST3A1	2.59567	10.992	2.08228	7.57517	5e-05	0.000969808	yes
SPHK1	16.141	67.8628	2.07189	8.07509	5e-05	0.000969808	yes
ITGA5	0.595859	2.47403	2.05382	3.63558	5e-05	0.000969808	yes
IL18R1	2.23761	9.24603	2.04687	6.33928	5e-05	0.000969808	yes
WDR69	2.89106	11.7772	2.02632	5.08204	5e-05	0.000969808	yes
ITGA10	3.86769	15.6538	2.01697	8.04876	5e-05	0.000969808	yes
ANTXR2	8.55351	34.6058	2.01643	6.4792	5e-05	0.000969808	yes
STX1A	4.85341	19.602	2.01393	7.32083	5e-05	0.000969808	yes
ZFP36	33.4317	134.126	2.0043	8.76296	5e-05	0.000969808	yes
IFNE	1.35966	5.38529	1.98578	3.8143	5e-05	0.000969808	yes
HKDC1	0.542265	2.1313	1.97466	4.78359	5e-05	0.000969808	yes
NAGS	0.820841	3.20597	1.96559	3.78487	5e-05	0.000969808	yes
SMTN	11.0742	43.1391	1.96179	8.51664	5e-05	0.000969808	yes
SH3KBP1	19.9241	77.0992	1.9522	6.77677	5e-05	0.000969808	yes
LOC283050	0.490272	1.89173	1.94805	3.67912	5e-05	0.000969808	yes
ITGA5	99.0499	378.102	1.93255	8.32182	5e-05	0.000969808	yes
ADAMTS6	1.23669	4.71893	1.93198	4.98511	5e-05	0.000969808	yes
PTX3	9.14963	34.6942	1.92291	7.20048	5e-05	0.000969808	yes
RHOB	10.1633	38.2015	1.91026	7.72035	5e-05	0.000969808	yes
BHLHE40	32.8987	122.579	1.89761	8.42531	5e-05	0.000969808	yes
DEPDC1,RPE65	137.582	512.256	1.89657	7.10542	5e-05	0.000969808	yes
ZC3H12A	14.1004	52.4131	1.89419	7.71823	5e-05	0.000969808	yes
NRP1	17.2039	63.9248	1.89364	8.31007	5e-05	0.000969808	yes
SNED1	1.66276	6.13869	1.88435	5.30624	5e-05	0.000969808	yes
SH2B3	3.81251	14.0697	1.88378	7.44622	5e-05	0.000969808	yes
HABP4	2.12882	7.83183	1.87929	6.4663	5e-05	0.000969808	yes
GPM6B	3.18814	11.5536	1.85756	5.93471	5e-05	0.000969808	yes
PGBD5	5.63923	20.4223	1.85657	6.98238	5e-05	0.000969808	yes
BTBD11	1.11571	4.02484	1.85096	6.0147	5e-05	0.000969808	yes
CXCL2	19.804	71.3429	1.84898	7.20174	5e-05	0.000969808	yes
VNN1	5.16224	18.2855	1.82463	4.56242	5e-05	0.000969808	yes
MIR221	3.94494	13.934	1.82053	5.11843	5e-05	0.000969808	yes
EPHB2	1.05499	3.69235	1.80731	5.77688	5e-05	0.000969808	yes
MLLT11	19.466	67.6539	1.79722	3.64411	5e-05	0.000969808	yes
SPRED3	1.15726	4.01674	1.79532	3.56601	5e-05	0.000969808	yes
ITPRIP	11.2067	38.3876	1.77628	7.60043	5e-05	0.000969808	yes
FLI1	1.48058	5.02679	1.76348	5.72833	5e-05	0.000969808	yes
QSOX1	61.936	210.258	1.76331	7.67596	5e-05	0.000969808	yes
SPRY2	8.68369	29.4323	1.76102	6.8577	5e-05	0.000969808	yes
AREG	39.829	134.981	1.76087	7.61804	5e-05	0.000969808	yes
ZNF697	1.28509	4.34663	1.75802	5.90252	5e-05	0.000969808	yes
IFFO1	0.848441	2.8533	1.74975	3.38187	5e-05	0.000969808	yes
TSPAN7	2.98226	10.0079	1.74666	5.54329	5e-05	0.000969808	yes
SLC20A1	162.384	537.297	1.72631	7.5334	5e-05	0.000969808	yes
HMGA1	284.689	939.184	1.72202	7.47007	5e-05	0.000969808	yes
HMGA2	18.7011	61.6738	1.72153	5.6113	5e-05	0.000969808	yes
C16orf52	16.385	53.7578	1.7141	5.61447	5e-05	0.000969808	yes
HTR7	1.94143	6.3405	1.70748	5.74833	5e-05	0.000969808	yes
JHDM1D	0.979315	3.18365	1.70084	5.36061	5e-05	0.000969808	yes
SOCS3	0.697352	2.26307	1.69832	4.50214	5e-05	0.000969808	yes
RPGR	11.2762	36.4993	1.69458	6.89537	5e-05	0.000969808	yes
HSD11B1	2.74612	8.86171	1.69019	4.84069	5e-05	0.000969808	yes
TNFAIP8L3	3.63826	11.6928	1.6843	5.80658	5e-05	0.000969808	yes
IER2	13.9546	44.7128	1.67995	7.16318	5e-05	0.000969808	yes
GALNT6	4.01243	12.8281	1.67676	6.59306	5e-05	0.000969808	yes
CXCL1	70.457	225.221	1.67652	7.12347	5e-05	0.000969808	yes
MALL	1.11301	3.5508	1.67367	4.50239	5e-05	0.000969808	yes
CHSY3	0.959342	3.05349	1.67034	3.89644	5e-05	0.000969808	yes
DLX2	1.75242	5.56124	1.66606	4.98908	5e-05	0.000969808	yes
GNG11	18.9951	59.971	1.65863	6.49388	5e-05	0.000969808	yes
PLEK2	16.3835	51.3555	1.64827	6.80986	5e-05	0.000969808	yes
ARHGAP24	2.41991	7.53389	1.63844	5.25448	5e-05	0.000969808	yes
SEMA7A	1.08558	3.364	1.63171	5.14815	5e-05	0.000969808	yes
HBEGF	2.67007	8.2625	1.6297	5.33365	5e-05	0.000969808	yes
DNER	34.4905	106.64	1.62848	6.88482	5e-05	0.000969808	yes
IKBKG	18.2658	55.9916	1.61607	3.56957	5e-05	0.000969808	yes
GLRX	30.7939	94.2759	1.61425	5.55079	5e-05	0.000969808	yes
FOSL1	34.0424	103.886	1.60959	5.37414	5e-05	0.000969808	yes
CDK5RAP2	11.0278	33.6138	1.6079	5.4999	5e-05	0.000969808	yes
ENC1	3.57768	10.8583	1.6017	6.05176	5e-05	0.000969808	yes
2014-03-03	1.10262	3.34038	1.59907	2.931	5e-05	0.000969808	yes
SLC6A15	35.3489	106.596	1.59241	6.69892	5e-05	0.000969808	yes
SRPX	29.5931	88.9392	1.58756	6.87276	5e-05	0.000969808	yes
ARHGDIB	21.168	63.4582	1.58392	3.48893	5e-05	0.000969808	yes
RAPH1	8.97299	26.8775	1.58274	7.00304	5e-05	0.000969808	yes
LOC344887	13.6342	40.8345	1.58256	5.02968	5e-05	0.000969808	yes
SLCO4A1	7.96741	23.8045	1.57905	5.9047	5e-05	0.000969808	yes
CDYL2	0.955109	2.82225	1.56311	4.92006	5e-05	0.000969808	yes
FZD8	1.77813	5.2474	1.56124	5.55776	5e-05	0.000969808	yes
PLAUR	10.6381	31.1771	1.55124	6.20529	5e-05	0.000969808	yes
DOCK10	1.94082	5.65639	1.54322	5.79928	5e-05	0.000969808	yes
ZCCHC6	11.9629	34.7489	1.5384	6.3157	5e-05	0.000969808	yes
CAPRIN2	9.76083	28.1372	1.5274	6.145	5e-05	0.000969808	yes
MTHFD2L	13.6865	39.4328	1.52664	4.53266	5e-05	0.000969808	yes
PLXNA2	30.573	88.0128	1.52546	6.09999	5e-05	0.000969808	yes
CLIC2	1.06528	3.06051	1.52255	4.46253	5e-05	0.000969808	yes
FOXC2	7.3126	20.8576	1.51212	5.15203	5e-05	0.000969808	yes
FRMD3	7.03282	20.0148	1.50889	6.23805	5e-05	0.000969808	yes
ALS2CR12,TRAK2	5.32474	15.0475	1.49875	3.93147	5e-05	0.000969808	yes
FMNL1	2.87901	8.12422	1.49665	4.86636	5e-05	0.000969808	yes
STXBP5	22.6466	63.3861	1.48487	5.06727	5e-05	0.000969808	yes
HSD17B2	18.3267	51.1312	1.48026	5.60278	5e-05	0.000969808	yes
NAMPT	65.788	183.421	1.47926	6.01532	5e-05	0.000969808	yes
TRMT6	34.2939	95.2824	1.47426	6.46933	5e-05	0.000969808	yes
CLMP	55.5095	153.718	1.46948	6.4558	5e-05	0.000969808	yes
IRAK2	1.72551	4.76519	1.46552	4.85925	5e-05	0.000969808	yes
THSD4	11.4001	31.4799	1.46538	6.39659	5e-05	0.000969808	yes
ST3GAL1	9.93715	27.2433	1.455	6.31731	5e-05	0.000969808	yes
CTSB	172.889	470.909	1.4456	4.65794	5e-05	0.000969808	yes
B4GALT6	4.42372	11.9987	1.43955	5.39948	5e-05	0.000969808	yes
DUSP1	256.461	695.262	1.43882	6.29235	5e-05	0.000969808	yes
ASPH	170.106	459.678	1.43419	6.00849	5e-05	0.000969808	yes
METTL9	39.7048	105.374	1.40813	6.15919	5e-05	0.000969808	yes
HMOX1	3.50256	9.26807	1.40386	4.59775	5e-05	0.000969808	yes
LETM2	14.3246	37.894	1.40347	3.38564	5e-05	0.000969808	yes
ANGPTL4	188.219	497.67	1.40278	6.27336	5e-05	0.000969808	yes
B4GALNT1	2.4676	6.50097	1.39755	3.46047	5e-05	0.000969808	yes
KLF12	3.02833	7.95051	1.39253	5.79074	5e-05	0.000969808	yes
ARNTL2	6.15235	16.0077	1.37956	5.22435	5e-05	0.000969808	yes
DUSP2	1.33935	3.48094	1.37795	3.64775	5e-05	0.000969808	yes
ITGA2	9.52831	24.6839	1.37328	4.68089	5e-05	0.000969808	yes
SEL1L3	7.50168	19.4126	1.37171	5.7402	5e-05	0.000969808	yes
SH3BGRL3	125.269	324.048	1.37118	6.17917	5e-05	0.000969808	yes
NRIP3	1.43616	3.71434	1.37089	4.37622	5e-05	0.000969808	yes
ACOX2	4.73694	12.2426	1.36988	4.49766	5e-05	0.000969808	yes
DNAJB5	1.95949	5.05916	1.36842	3.33091	5e-05	0.000969808	yes
CUL4B	124.389	320.388	1.36496	5.58541	5e-05	0.000969808	yes
MCTP1	5.1861	13.3455	1.36363	3.93343	5e-05	0.000969808	yes
LOC284454	5.37076	13.8157	1.36311	5.21153	5e-05	0.000969808	yes
ETV4	7.50294	19.267	1.3606	5.42016	5e-05	0.000969808	yes
LOC728431	1.49722	3.84269	1.35983	3.45807	5e-05	0.000969808	yes
KYNU	110.769	283.639	1.3565	6.0908	5e-05	0.000969808	yes
SERPINE2	47.9396	122.122	1.34904	5.92625	5e-05	0.000969808	yes
MGAM	0.73774	1.87352	1.34457	3.72066	5e-05	0.000969808	yes
JAM3	1.39761	3.54187	1.34155	3.82283	5e-05	0.000969808	yes
JUNB	46.7802	118.312	1.33862	5.90627	5e-05	0.000969808	yes
CNTN3	2.2528	5.68814	1.33624	4.73194	5e-05	0.000969808	yes
JARID2	4.71157	11.8204	1.327	5.44443	5e-05	0.000969808	yes
TRIB1	11.4672	28.7323	1.32516	5.16708	5e-05	0.000969808	yes
PHC2	62.1365	154.686	1.31583	5.75709	5e-05	0.000969808	yes
DGAT2	4.44481	11.0083	1.3084	3.8166	5e-05	0.000969808	yes
MLKL	10.4685	25.8788	1.30571	5.34877	5e-05	0.000969808	yes
PDE4B	2.63493	6.45808	1.29334	4.66106	5e-05	0.000969808	yes
VEGFC	4.87493	11.934	1.29163	4.23191	5e-05	0.000969808	yes
CLCN5	0.958872	2.34735	1.29162	4.51366	5e-05	0.000969808	yes
GABRA2	1.08205	2.64586	1.28997	3.04464	5e-05	0.000969808	yes
FBLN5	4.37899	10.707	1.28989	4.79303	5e-05	0.000969808	yes
MLPH	11.9102	29.108	1.28921	4.59254	5e-05	0.000969808	yes
SULT1B1	13.6538	33.3036	1.28638	4.48203	5e-05	0.000969808	yes
LAMA1	1.30667	3.16454	1.27611	3.46691	5e-05	0.000969808	yes
ULBP2	3.1119	7.50337	1.26974	3.92529	5e-05	0.000969808	yes
FNDC4	1.87965	4.50658	1.26157	3.61019	5e-05	0.000969808	yes
BMP2	1.41811	3.38852	1.25669	3.62973	5e-05	0.000969808	yes
UHRF2	16.0614	38.3683	1.25632	5.17583	5e-05	0.000969808	yes
GPR3	1.2605	3.00849	1.25505	3.41631	5e-05	0.000969808	yes
C1orf38	1.04949	2.49774	1.25093	2.42383	5e-05	0.000969808	yes
SLC7A11	20.0268	47.355	1.24158	5.61398	5e-05	0.000969808	yes
ARHGAP31	2.86628	6.77181	1.24036	2.92657	5e-05	0.000969808	yes
DMBT1	2.17036	5.11812	1.23768	3.54897	5e-05	0.000969808	yes
KLF10	34.3506	80.7928	1.23389	5.44533	5e-05	0.000969808	yes
CLDN12	13.5009	31.7297	1.23278	5.17389	5e-05	0.000969808	yes
ARHGEF6	1.47868	3.4731	1.23192	4.20974	5e-05	0.000969808	yes
SAT1	82.3675	191.395	1.2164	4.64277	5e-05	0.000969808	yes
LOC340113	5.15211	11.9677	1.21591	3.39499	5e-05	0.000969808	yes
TRIB3	15.8432	36.7769	1.21493	5.04401	5e-05	0.000969808	yes
UGDH	19.8012	45.8471	1.21125	5.08613	5e-05	0.000969808	yes
C7orf74	7.93318	18.3346	1.2086	4.87159	5e-05	0.000969808	yes
TOMM34	27.8643	64.3623	1.2078	3.51161	5e-05	0.000969808	yes
DUSP4	28.018	64.7053	1.20753	5.38622	5e-05	0.000969808	yes
UGP2	176.947	408.556	1.20722	5.35265	5e-05	0.000969808	yes
TGFA	4.91558	11.3222	1.20372	4.68796	5e-05	0.000969808	yes
ETV1	2.34205	5.39319	1.20336	4.46685	5e-05	0.000969808	yes
ERCC1	50.7679	116.839	1.20254	4.00924	5e-05	0.000969808	yes
PHGDH	18.9289	43.3267	1.19466	5.10103	5e-05	0.000969808	yes
SLC25A37	38.3658	87.4279	1.18827	3.30098	5e-05	0.000969808	yes
CCDC85B	20.0598	45.6671	1.18685	3.10635	5e-05	0.000969808	yes
KIF13B	1.98849	4.51302	1.18242	4.37797	5e-05	0.000969808	yes
ANPEP	385.099	872.277	1.17956	4.84921	5e-05	0.000969808	yes
LRRC8A	18.8843	42.7464	1.17861	5.20799	5e-05	0.000969808	yes
GXYLT1	6.85923	15.5254	1.17852	5.01961	5e-05	0.000969808	yes
HEY1	1.70614	3.85934	1.17761	3.31708	5e-05	0.000969808	yes
MAMLD1	1.64222	3.71297	1.17693	3.89507	5e-05	0.000969808	yes
CHST11	2.22085	5.01633	1.17552	4.40167	5e-05	0.000969808	yes
SPOCD1	7.23229	16.3087	1.17312	3.93071	5e-05	0.000969808	yes
ARHGAP18	11.3219	25.4794	1.17021	4.83951	5e-05	0.000969808	yes
TSC22D1	58.1603	130.717	1.16834	4.8991	5e-05	0.000969808	yes
JAG1	4.38026	9.81633	1.16417	4.7132	5e-05	0.000969808	yes
PTPRE	4.31418	9.64867	1.16124	4.2758	5e-05	0.000969808	yes
FAM100B	14.846	33.0693	1.15542	4.75897	5e-05	0.000969808	yes
LOC154761	1.08972	2.42303	1.15286	2.98725	5e-05	0.000969808	yes
LPXN	4.91066	10.8826	1.14803	3.47259	5e-05	0.000969808	yes
SLC9A7	5.28286	11.7009	1.14723	4.21137	5e-05	0.000969808	yes
PPP2R2C	2.50867	5.53535	1.14175	3.81328	5e-05	0.000969808	yes
PYGB	173.811	383.106	1.14022	4.78395	5e-05	0.000969808	yes
CA12	18.2645	40.1966	1.13803	4.91452	5e-05	0.000969808	yes
TNFRSF10D	42.6137	93.7705	1.13782	5.0661	5e-05	0.000969808	yes
IVNS1ABP	41.0614	90.3204	1.13727	4.85634	5e-05	0.000969808	yes
CD68	17.3476	38.0882	1.13461	4.78072	5e-05	0.000969808	yes
IL27RA	5.30576	11.6243	1.13152	4.39676	5e-05	0.000969808	yes
UST	2.30062	5.03633	1.13035	3.96799	5e-05	0.000969808	yes
MICAL2	6.54114	14.2628	1.12465	4.71305	5e-05	0.000969808	yes
MGLL	5.03788	10.9728	1.12305	4.51338	5e-05	0.000969808	yes
PPARG	4.55113	9.91121	1.12284	3.93254	5e-05	0.000969808	yes
EML1	3.81067	8.27662	1.119	4.34799	5e-05	0.000969808	yes
STEAP3	27.17	58.9608	1.11774	4.93696	5e-05	0.000969808	yes
KIF3C	2.0411	4.42817	1.11736	4.27395	5e-05	0.000969808	yes
PSME4	24.0035	52.0474	1.11658	4.05989	5e-05	0.000969808	yes
RAB27B	8.69263	18.8005	1.1129	4.86085	5e-05	0.000969808	yes
PID1	24.7328	53.4154	1.11083	4.2678	5e-05	0.000969808	yes
CLIP2	3.28747	7.0829	1.10736	4.55256	5e-05	0.000969808	yes
FAM115C	1.06254	2.28577	1.10517	3.45786	5e-05	0.000969808	yes
SLC2A13	1.69511	3.64402	1.10415	3.43043	5e-05	0.000969808	yes
DRAP1	55.5703	119.203	1.10103	4.87364	5e-05	0.000969808	yes
RASSF8	15.5928	33.2244	1.09136	4.35816	5e-05	0.000969808	yes
GSTO1	111.668	237.869	1.09095	4.32131	5e-05	0.000969808	yes
SMAD9	2.46689	5.25361	1.09062	3.29298	5e-05	0.000969808	yes
CCDC68	3.28	6.95036	1.08339	4.05853	5e-05	0.000969808	yes
CSRNP1	6.13268	12.9491	1.07826	4.30656	5e-05	0.000969808	yes
FKBP1A,SDCBP2	223.931	472.362	1.07684	4.75152	5e-05	0.000969808	yes
CAPN5	1.53106	3.2187	1.07195	3.60059	5e-05	0.000969808	yes
ETS1	15.2709	32.0243	1.06838	4.63313	5e-05	0.000969808	yes
EFNB2	37.3467	78.2838	1.06773	4.72751	5e-05	0.000969808	yes
SKAP2	13.5049	28.3064	1.06764	4.12562	5e-05	0.000969808	yes
S100A16	434.542	910.214	1.06671	4.75331	5e-05	0.000969808	yes
SRGN	129.434	270.472	1.06326	4.76446	5e-05	0.000969808	yes
IL1R1	12.155	25.3589	1.06094	4.5205	5e-05	0.000969808	yes
CTSL1	77.2995	161.232	1.0606	4.635	5e-05	0.000969808	yes
C11orf91,CD59	462.923	965.145	1.05997	3.16913	5e-05	0.000969808	yes
ZEB2	6.18266	12.8839	1.05927	4.01898	5e-05	0.000969808	yes
EMP2	10.0313	20.8685	1.05682	4.40353	5e-05	0.000969808	yes
FGFR1	3.52959	7.33248	1.0548	3.20236	5e-05	0.000969808	yes
COL4A1	11.9915	24.8756	1.05272	4.63988	5e-05	0.000969808	yes
TMEM171	3.24697	6.72305	1.05002	3.13586	5e-05	0.000969808	yes
GDA	2.61278	5.39827	1.04691	3.68877	5e-05	0.000969808	yes
KLHL2	12.2387	25.2306	1.04372	4.31618	5e-05	0.000969808	yes
CTSC	104.043	214.459	1.04352	3.56464	5e-05	0.000969808	yes
DPYSL3	4.897	10.08	1.04153	4.30478	5e-05	0.000969808	yes
SERPINA1	4.46216	9.17242	1.03956	3.77186	5e-05	0.000969808	yes
ATP2B4	18.7685	38.5389	1.038	4.58725	5e-05	0.000969808	yes
MAP2K1	48.8181	100.225	1.03775	4.41146	5e-05	0.000969808	yes
PTK2B	31.874	65.4213	1.03738	4.0806	5e-05	0.000969808	yes
CPEB4	12.3533	25.2597	1.03194	4.26485	5e-05	0.000969808	yes
LOC100507127	19.353	39.5506	1.03114	2.54896	5e-05	0.000969808	yes
VEGFA	30.8886	63.0225	1.02879	4.21795	5e-05	0.000969808	yes
IL6R	4.64248	9.44021	1.02392	3.52028	5e-05	0.000969808	yes
LAMB3	203.023	412.223	1.02178	4.19743	5e-05	0.000969808	yes
TMEM55A	6.00117	12.1115	1.01306	3.39825	5e-05	0.000969808	yes
PLEKHG5,TNFRSF25	6.96077	14.0459	1.01283	3.741	5e-05	0.000969808	yes
HS3ST3B1	1.78614	3.5997	1.01103	3.06496	5e-05	0.000969808	yes
PRKCH	3.40707	6.85229	1.00805	3.28827	5e-05	0.000969808	yes
CHIC1	1.94562	3.91233	1.0078	3.57383	5e-05	0.000969808	yes
FAM102B	2.07925	4.16959	1.00384	3.50738	5e-05	0.000969808	yes
PMAIP1	10.5699	21.1841	1.00301	3.78376	5e-05	0.000969808	yes
MAPKAPK3	40.5307	81.2011	1.00248	3.46528	5e-05	0.000969808	yes
FHOD1	15.0522	29.9413	0.992164	4.36764	5e-05	0.000969808	yes
TYRO3	5.35307	10.6334	0.990168	3.92108	5e-05	0.000969808	yes
PPP1R3B	4.69099	9.29626	0.986757	3.95041	5e-05	0.000969808	yes
GADD45A	55.0828	109.023	0.984957	3.75537	5e-05	0.000969808	yes
CSGALNACT2	12.1198	23.9522	0.98279	4.11716	5e-05	0.000969808	yes
SERPINB8	14.7818	29.1844	0.981377	4.14426	5e-05	0.000969808	yes
COPS8	182.304	359.904	0.981264	4.03852	5e-05	0.000969808	yes
TNFAIP3	7.63399	15.0635	0.980551	3.27229	5e-05	0.000969808	yes
NAV1	12.4903	24.6061	0.97821	3.68041	5e-05	0.000969808	yes
AGPAT6	20.6095	40.5953	0.978004	3.34415	5e-05	0.000969808	yes
NR2F1	9.78541	19.2236	0.974176	3.33065	5e-05	0.000969808	yes
AOX1	48.0841	93.9583	0.966462	4.19839	5e-05	0.000969808	yes
ANKH	11.2003	21.8802	0.966094	2.99295	5e-05	0.000969808	yes
IGF2BP3	11.2615	21.9688	0.964062	3.8783	5e-05	0.000969808	yes
TPBG	20.4823	39.9254	0.962928	4.12267	5e-05	0.000969808	yes
LOC100287314	6.6408	12.9361	0.961973	3.18293	5e-05	0.000969808	yes
C4orf32	8.87984	17.2599	0.958817	3.62539	5e-05	0.000969808	yes
LHFPL2	8.5928	16.625	0.952151	3.96483	5e-05	0.000969808	yes
ZEB1	4.29613	8.30401	0.950769	3.74104	5e-05	0.000969808	yes
WWC3	6.0425	11.6607	0.948435	4.03368	5e-05	0.000969808	yes
SQRDL	34.6706	66.5396	0.940501	4.07542	5e-05	0.000969808	yes
C5orf62	32.5762	62.3931	0.937568	3.8467	5e-05	0.000969808	yes
NCEH1	12.7423	24.3732	0.935677	3.9682	5e-05	0.000969808	yes
FOSB	8.84801	16.8742	0.931398	3.61433	5e-05	0.000969808	yes
TMEM44	5.47442	10.4322	0.930264	2.76211	5e-05	0.000969808	yes
SLC7A2	41.0494	78.0849	0.927683	4.16886	5e-05	0.000969808	yes
TRNP1	23.1548	44.0358	0.927365	3.8462	5e-05	0.000969808	yes
PCNX	10.6398	20.2348	0.927363	2.47519	5e-05	0.000969808	yes
KYNU	1.22047	2.31549	0.923882	3.05982	5e-05	0.000969808	yes
KCNN4	16.9601	32.1579	0.923034	3.83761	5e-05	0.000969808	yes
SQSTM1	179.744	339.942	0.919343	3.34303	5e-05	0.000969808	yes
GJB2	3.85276	7.28222	0.918488	3.18513	5e-05	0.000969808	yes
TOX2	1.81393	3.41907	0.914487	2.92871	5e-05	0.000969808	yes
HSPA13	12.7549	23.9638	0.909807	3.89125	5e-05	0.000969808	yes
FAM135A	1.95841	3.67144	0.906663	3.14165	5e-05	0.000969808	yes
SERTAD1	16.529	30.9643	0.90561	3.55217	5e-05	0.000969808	yes
VIM	701.355	1312.99	0.904637	3.80007	5e-05	0.000969808	yes
CRIP2	19.0119	35.5491	0.902908	3.5336	5e-05	0.000969808	yes
ELK3	36.7057	68.5686	0.901542	3.73796	5e-05	0.000969808	yes
TMEM38B	9.99359	18.6294	0.898503	3.42971	5e-05	0.000969808	yes
GPR64	5.63139	10.4845	0.896692	3.56665	5e-05	0.000969808	yes
RIT1	9.42917	17.48	0.890504	3.64007	5e-05	0.000969808	yes
ZNF185	6.95947	12.8745	0.887466	3.65354	5e-05	0.000969808	yes
PHKA1	9.8264	18.1744	0.887174	3.63121	5e-05	0.000969808	yes
GRB10	10.302	19.0274	0.885153	3.77842	5e-05	0.000969808	yes
FGFRL1	12.074	22.2959	0.884877	3.32739	5e-05	0.000969808	yes
LPIN2	6.92985	12.7312	0.877473	3.72461	5e-05	0.000969808	yes
SLC16A3	7.99207	14.6621	0.875455	3.29717	5e-05	0.000969808	yes
TMEM154	5.67205	10.4033	0.875103	3.2495	5e-05	0.000969808	yes
RGL1	2.30807	4.22432	0.872034	3.12416	5e-05	0.000969808	yes
AKT3	19.7806	36.0476	0.86582	2.7329	5e-05	0.000969808	yes
ZCCHC24	3.02973	5.50326	0.861096	3.28097	5e-05	0.000969808	yes
PTPRN2	7.31357	13.2841	0.861056	3.22984	5e-05	0.000969808	yes
ABR	13.1823	23.9385	0.860736	3.74005	5e-05	0.000969808	yes
KIFAP3	19.3328	35.0734	0.859327	3.68609	5e-05	0.000969808	yes
C13orf27	11.4168	20.6666	0.856134	2.95587	5e-05	0.000969808	yes
GCC2	3.93207	7.10447	0.853439	3.3846	5e-05	0.000969808	yes
TWF2	31.1542	56.124	0.849191	3.66338	5e-05	0.000969808	yes
FTL	1111.91	1995.79	0.84392	3.68655	5e-05	0.000969808	yes
DOCK6	4.33076	7.75658	0.840801	3.33867	5e-05	0.000969808	yes
FNIP2	2.35984	4.2152	0.836915	2.63536	5e-05	0.000969808	yes
FAM126A	15.0565	26.8898	0.836671	3.26024	5e-05	0.000969808	yes
PHLDA2	85.3505	152.076	0.833318	3.75373	5e-05	0.000969808	yes
FLCN	3.64423	6.47482	0.829227	2.88252	5e-05	0.000969808	yes
STK10	12.9033	22.9219	0.828979	3.59028	5e-05	0.000969808	yes
ERGIC1	186.86	331.427	0.826736	3.65648	5e-05	0.000969808	yes
PPFIBP1	13.3437	23.6625	0.826442	3.46702	5e-05	0.000969808	yes
ME1	24.935	44.204	0.826007	3.61826	5e-05	0.000969808	yes
KIAA0040	5.43453	9.61732	0.823479	3.30311	5e-05	0.000969808	yes
LYN	9.52161	16.8465	0.823169	3.20444	5e-05	0.000969808	yes
C6orf1	11.9181	21.0764	0.822471	2.77659	5e-05	0.000969808	yes
DCBLD2	97.5339	172.441	0.82213	3.68747	5e-05	0.000969808	yes
SACS	6.26525	11.0699	0.821204	3.63379	5e-05	0.000969808	yes
C9orf30,TMEFF1	17.8942	31.6046	0.820643	3.22908	5e-05	0.000969808	yes
SLC39A10	19.484	34.3022	0.816014	3.48258	5e-05	0.000969808	yes
SNPH	1.98073	3.47923	0.812736	2.97386	5e-05	0.000969808	yes
SECTM1	12.0454	21.146	0.811897	3.36306	5e-05	0.000969808	yes
FIGF,PIR	28.4712	49.8488	0.808054	3.29953	5e-05	0.000969808	yes
TNFRSF12A	136.663	238.911	0.805846	3.59523	5e-05	0.000969808	yes
OAF	17.4648	30.5082	0.804745	3.16036	5e-05	0.000969808	yes
DDR2,UAP1	112.945	197.098	0.803295	3.53815	5e-05	0.000969808	yes
OSGIN1	3.47355	6.06103	0.803152	2.80458	5e-05	0.000969808	yes
C4orf34	5.1968	9.04951	0.800215	3.15959	5e-05	0.000969808	yes
KIDINS220,MBOAT2	25.3427	44.0956	0.799067	3.456	5e-05	0.000969808	yes
HPCAL1	129.536	224.945	0.796213	3.6048	5e-05	0.000969808	yes
HOMER3	33.5174	58.0645	0.792746	3.48471	5e-05	0.000969808	yes
SMOX	17.7261	30.6764	0.791255	3.41778	5e-05	0.000969808	yes
SAP30	16.2639	28.1452	0.791219	3.04579	5e-05	0.000969808	yes
CCDC82	6.54995	11.3226	0.789654	2.84398	5e-05	0.000969808	yes
SNAI2	65.7208	113.565	0.789096	3.49139	5e-05	0.000969808	yes
HERC3	8.50801	14.6774	0.786699	3.17168	5e-05	0.000969808	yes
IL1A	16.5229	28.4741	0.785186	3.17168	5e-05	0.000969808	yes
HJURP	11.8096	20.3283	0.783529	3.1399	5e-05	0.000969808	yes
PDLIM4	45.9414	79.0527	0.783022	2.84814	5e-05	0.000969808	yes
AXL	32.8821	56.567	0.782659	3.37485	5e-05	0.000969808	yes
CEP170	20.2483	34.7419	0.778877	3.46554	5e-05	0.000969808	yes
WWTR1	17.4388	29.9051	0.77809	3.3745	5e-05	0.000969808	yes
TMEM206	11.8263	20.2686	0.777243	3.09678	5e-05	0.000969808	yes
CDC45	20.9406	35.8375	0.775165	3.28221	5e-05	0.000969808	yes
MPRIP	71.9011	122.952	0.774009	3.09646	5e-05	0.000969808	yes
OSTF1	16.9513	28.9249	0.770917	3.04247	5e-05	0.000969808	yes
CCDC99	16.9295	28.8794	0.770505	3.27678	5e-05	0.000969808	yes
EDEM3	19.5217	33.3004	0.770459	3.43706	5e-05	0.000969808	yes
RAPGEF2	5.56622	9.49154	0.769945	3.09097	5e-05	0.000969808	yes
TGFB1	35.0856	59.746	0.767963	3.42999	5e-05	0.000969808	yes
SRXN1	50.4966	85.9292	0.766963	3.40743	5e-05	0.000969808	yes
EPB41L2	7.96054	13.5437	0.766682	3.20599	5e-05	0.000969808	yes
FAM83A	38.3332	65.1639	0.765478	3.08313	5e-05	0.000969808	yes
AP1S2	7.46723	12.6821	0.764149	2.72638	5e-05	0.000969808	yes
FOXD1	7.46364	12.6669	0.76311	3.00014	5e-05	0.000969808	yes
DDHD1	2.40787	4.08495	0.762562	3.07331	5e-05	0.000969808	yes
MAP1S	8.62614	14.611	0.760267	3.23551	5e-05	0.000969808	yes
RTN4	188.1	318.482	0.759715	3.19574	5e-05	0.000969808	yes
RAI14	19.6557	33.2587	0.758781	3.35005	5e-05	0.000969808	yes
SGMS1	8.8585	14.9879	0.758665	2.97982	5e-05	0.000969808	yes
ZFP36L1	120.127	203.149	0.757975	3.38391	5e-05	0.000969808	yes
EHBP1L1	10.4852	17.7107	0.756262	3.26119	5e-05	0.000969808	yes
RAC2	67.7101	114.331	0.755776	3.3442	5e-05	0.000969808	yes
MAFG	12.344	20.8368	0.755323	3.21994	5e-05	0.000969808	yes
PTGR1	30.357	51.2415	0.755282	3.02524	5e-05	0.000969808	yes
DPYD	11.457	19.325	0.754235	3.15988	5e-05	0.000969808	yes
RTCD1	19.0844	32.1316	0.751602	3.17363	5e-05	0.000969808	yes
C1orf31	89.6207	150.856	0.751269	3.22284	5e-05	0.000969808	yes
WARS	34.6398	58.1691	0.747822	3.2795	5e-05	0.000969808	yes
MT2A	7823.68	13133.2	0.747298	3.10382	5e-05	0.000969808	yes
AVL9	7.64433	12.823	0.746267	3.15584	5e-05	0.000969808	yes
TTC7B	4.90734	8.21375	0.743101	2.83761	5e-05	0.000969808	yes
AKR1B1	177.122	295.691	0.739348	3.31405	5e-05	0.000969808	yes
C9orf25	5.66692	9.45473	0.738472	2.85702	5e-05	0.000969808	yes
PPP1R15A	15.0999	25.1286	0.734789	3.12712	5e-05	0.000969808	yes
SPARC	30.4918	50.6826	0.73307	3.20735	5e-05	0.000969808	yes
PSMD2	128.066	212.821	0.732758	3.24529	5e-05	0.000969808	yes
RASA3	5.72864	9.51404	0.731864	2.96679	5e-05	0.000969808	yes
NUMB	25.0112	41.5273	0.731489	3.03926	5e-05	0.000969808	yes
TRIM16L	28.1115	46.552	0.727683	3.13843	5e-05	0.000969808	yes
BZW1	219.346	362.931	0.72649	3.21741	5e-05	0.000969808	yes
PORCN	9.9173	16.4079	0.726376	2.76414	5e-05	0.000969808	yes
RECQL	31.6318	52.3092	0.72569	2.94047	5e-05	0.000969808	yes
CRYL1	9.63717	15.9193	0.724096	2.70095	5e-05	0.000969808	yes
SPIRE1	9.41774	15.5563	0.724048	3.05317	5e-05	0.000969808	yes
RFK	15.3244	25.2594	0.720997	2.94791	5e-05	0.000969808	yes
C9orf47,S1PR3	40.5847	66.8234	0.719416	3.20037	5e-05	0.000969808	yes
VPS37B	9.11309	14.9677	0.715844	2.91688	5e-05	0.000969808	yes
PRNP	101.514	166.433	0.713259	3.21439	5e-05	0.000969808	yes
USP12	14.3907	23.5587	0.711117	3.08875	5e-05	0.000969808	yes
SECISBP2L	5.78839	9.4549	0.707901	2.96902	5e-05	0.000969808	yes
FEZ2	29.848	48.7504	0.707781	3.00839	5e-05	0.000969808	yes
PPP1R15B	28.0413	45.7564	0.706421	3.07473	5e-05	0.000969808	yes
ASB1	7.8939	12.8724	0.705467	3.01381	5e-05	0.000969808	yes
HIPK2	24.6652	40.1214	0.701893	2.80011	5e-05	0.000969808	yes
TSPAN14	16.43	26.6897	0.699948	3.02925	5e-05	0.000969808	yes
CCND3	55.3524	89.7261	0.696882	3.05308	5e-05	0.000969808	yes
RAB13	85.1452	137.905	0.695677	3.07871	5e-05	0.000969808	yes
PNPLA8	12.5081	20.2396	0.69432	2.90373	5e-05	0.000969808	yes
GOLT1B	22.9192	37.0838	0.694235	3.02075	5e-05	0.000969808	yes
CHCHD3	30.132	48.7314	0.693552	2.87895	5e-05	0.000969808	yes
B4GALT3	20.2777	32.6655	0.687876	2.86428	5e-05	0.000969808	yes
IRX4	23.7364	38.198	0.686396	2.91192	5e-05	0.000969808	yes
REPS1	15.2071	24.407	0.68255	2.90687	5e-05	0.000969808	yes
YIPF5	45.8251	73.0027	0.671813	2.98077	5e-05	0.000969808	yes
PLIN3	58.9608	93.8187	0.670118	2.99562	5e-05	0.000969808	yes
NCAPG	20.401	32.4583	0.66995	2.69799	5e-05	0.000969808	yes
DPY19L1	25.2447	40.1365	0.668932	2.95051	5e-05	0.000969808	yes
MANF	57.0844	90.7298	0.668481	2.87494	5e-05	0.000969808	yes
ZNF259	24.0419	38.1796	0.667248	2.9178	5e-05	0.000969808	yes
CDCA4	25.6858	40.6259	0.661432	2.8537	5e-05	0.000969808	yes
KIF23,PAQR5	38.249	60.3083	0.656935	2.87534	5e-05	0.000969808	yes
ACSL4	42.0368	66.241	0.656071	2.91298	5e-05	0.000969808	yes
EMP3	162.758	255.774	0.652138	2.90867	5e-05	0.000969808	yes
ATP6V1B2	24.6966	38.7513	0.649933	2.84256	5e-05	0.000969808	yes
LOXL2	29.4273	46.1125	0.648002	2.81127	5e-05	0.000969808	yes
SPAG9	18.5145	28.9948	0.647136	2.6944	5e-05	0.000969808	yes
DVL1	36.6773	57.3015	0.643686	2.89225	5e-05	0.000969808	yes
PLOD1	76.9892	119.935	0.639524	2.8796	5e-05	0.000969808	yes
CBL	9.1358	14.2019	0.636479	2.79609	5e-05	0.000969808	yes
SLK	24.508	37.4469	0.611594	2.6399	5e-05	0.000969808	yes
COL4A2	29.2826	44.6873	0.609821	2.75147	5e-05	0.000969808	yes
ADI1	118.862	78.3173	-0.601883	-2.65809	5e-05	0.000969808	yes
DGCR2	22.8628	14.6923	-0.637941	-2.71989	5e-05	0.000969808	yes
MORF4L2	320.059	205.404	-0.639877	-2.82147	5e-05	0.000969808	yes
TFAP2A	24.3592	15.5474	-0.647799	-2.72654	5e-05	0.000969808	yes
HSPB1	285.033	180.638	-0.658026	-2.94543	5e-05	0.000969808	yes
CCBE1	37.4771	23.7503	-0.658068	-2.88822	5e-05	0.000969808	yes
CAV1	432.464	270.133	-0.678908	-2.98409	5e-05	0.000969808	yes
KRT8	89.3234	55.79	-0.679031	-3.04665	5e-05	0.000969808	yes
NOTCH1	8.55373	5.31335	-0.686932	-3.03232	5e-05	0.000969808	yes
RHOD	56.3219	34.7916	-0.694958	-2.9657	5e-05	0.000969808	yes
AK4	25.2886	15.617	-0.695363	-3.03753	5e-05	0.000969808	yes
DAG1	39.0523	23.989	-0.703034	-3.12404	5e-05	0.000969808	yes
FAM101A,ZNF664,ZNF664-FAM101A	29.7822	18.2479	-0.706719	-3.02951	5e-05	0.000969808	yes
DLG3	4.73112	2.88964	-0.711291	-2.58003	5e-05	0.000969808	yes
GAA	10.666	6.46757	-0.721723	-2.94253	5e-05	0.000969808	yes
SYNGR2	41.5239	25.0906	-0.726796	-3.06563	5e-05	0.000969808	yes
OSBP2	54.1914	32.6984	-0.728842	-3.05156	5e-05	0.000969808	yes
SGK1	67.7048	40.705	-0.734051	-3.16933	5e-05	0.000969808	yes
KRT7	1633.8	980.593	-0.736508	-3.01968	5e-05	0.000969808	yes
ITGB8	6.24752	3.74216	-0.739411	-2.9575	5e-05	0.000969808	yes
IL20RB	82.2324	49.2381	-0.739931	-3.26351	5e-05	0.000969808	yes
IFITM1,IFITM2	336.243	200.719	-0.744323	-3.30082	5e-05	0.000969808	yes
SESN1	12.6513	7.54636	-0.745436	-2.75928	5e-05	0.000969808	yes
ID3	132.017	78.6285	-0.747601	-3.26513	5e-05	0.000969808	yes
CTSD	166.348	98.7823	-0.751879	-3.24477	5e-05	0.000969808	yes
LAPTM4A	274.237	162.608	-0.754027	-3.22809	5e-05	0.000969808	yes
KIAA0114	93.5137	55.438	-0.754301	-3.09431	5e-05	0.000969808	yes
ZFHX3	6.50341	3.85204	-0.755571	-3.00557	5e-05	0.000969808	yes
PTPRS	12.2054	7.19767	-0.761917	-3.30787	5e-05	0.000969808	yes
AKAP2,PALM2,PALM2-AKAP2	47.0186	27.7228	-0.76216	-3.3705	5e-05	0.000969808	yes
MR1	8.10383	4.77641	-0.762678	-3.18106	5e-05	0.000969808	yes
TNFAIP2	9.58094	5.62747	-0.767682	-2.81728	5e-05	0.000969808	yes
FAIM	27.1827	15.966	-0.767687	-2.91296	5e-05	0.000969808	yes
MSRB3	21.3947	12.545	-0.770142	-3.05218	5e-05	0.000969808	yes
SSH3	11.4242	6.68411	-0.773282	-3.05124	5e-05	0.000969808	yes
TRIM22	12.4094	7.2598	-0.773431	-2.92798	5e-05	0.000969808	yes
PLSCR1	29.3591	17.1234	-0.777841	-3.07696	5e-05	0.000969808	yes
LOC100499467	11.4946	6.68049	-0.78293	-2.84197	5e-05	0.000969808	yes
PSCA	59.8508	34.7736	-0.783381	-3.00918	5e-05	0.000969808	yes
SPINT1	18.8403	10.9384	-0.784415	-3.22565	5e-05	0.000969808	yes
PPTC7	41.6237	24.1002	-0.788361	-3.32046	5e-05	0.000969808	yes
AVPI1	86.0364	49.4737	-0.798285	-3.51109	5e-05	0.000969808	yes
ALCAM	85.4101	49.0499	-0.800157	-3.37611	5e-05	0.000969808	yes
SULT1E1	51.4444	29.4586	-0.804324	-2.88366	5e-05	0.000969808	yes
CTSF	16.6604	9.49425	-0.811298	-3.12062	5e-05	0.000969808	yes
PHLPP1	4.58099	2.60998	-0.81162	-3.00155	5e-05	0.000969808	yes
DIS3L	18.9077	10.7475	-0.814976	-2.61131	5e-05	0.000969808	yes
DPYSL2	24.6953	14.0065	-0.818134	-3.54101	5e-05	0.000969808	yes
TACC2	12.1929	6.86352	-0.82902	-3.35993	5e-05	0.000969808	yes
ETS2	17.4925	9.79929	-0.835989	-3.45618	5e-05	0.000969808	yes
LIPA	71.5078	39.971	-0.839146	-3.69978	5e-05	0.000969808	yes
CFH	29.7326	16.5821	-0.842418	-3.425	5e-05	0.000969808	yes
BTG1	50.7441	28.2836	-0.843275	-3.49645	5e-05	0.000969808	yes
UNC93B1	20.164	11.2255	-0.844997	-3.50824	5e-05	0.000969808	yes
ITGA6	51.0455	28.4138	-0.845192	-3.74993	5e-05	0.000969808	yes
ZFP36L2	51.6979	28.7122	-0.848443	-3.82334	5e-05	0.000969808	yes
AGRN	83.3794	46.3016	-0.848628	-3.76033	5e-05	0.000969808	yes
SLC46A1	6.88455	3.81186	-0.852867	-3.39378	5e-05	0.000969808	yes
NEDD4L	20.3217	11.2432	-0.853965	-3.2337	5e-05	0.000969808	yes
GCLC	97.3993	53.8575	-0.854764	-3.80249	5e-05	0.000969808	yes
DKK1	447.455	245.571	-0.865604	-3.83495	5e-05	0.000969808	yes
BASP1	96.6083	52.5739	-0.877801	-3.93135	5e-05	0.000969808	yes
CRIM1	97.2151	52.841	-0.879523	-3.84366	5e-05	0.000969808	yes
AP1S3	13.4333	7.27781	-0.884233	-3.37338	5e-05	0.000969808	yes
ZNF33B	4.49051	2.41125	-0.897101	-3.12881	5e-05	0.000969808	yes
KLF4	9.74952	5.23389	-0.897448	-3.39703	5e-05	0.000969808	yes
FYN	11.4114	6.12594	-0.897471	-3.38741	5e-05	0.000969808	yes
TXNIP	72.3103	38.7958	-0.898301	-3.90572	5e-05	0.000969808	yes
MYO1D	6.76205	3.62248	-0.900484	-3.33664	5e-05	0.000969808	yes
LCP1	5.36137	2.86105	-0.906055	-3.25717	5e-05	0.000969808	yes
DFNA5	17.5587	9.35537	-0.908318	-3.48101	5e-05	0.000969808	yes
SH3YL1	16.8563	8.96563	-0.910807	-3.10594	5e-05	0.000969808	yes
TSPYL2	17.4555	9.15394	-0.931219	-3.78535	5e-05	0.000969808	yes
CYP2U1	6.52078	3.41349	-0.933796	-3.43464	5e-05	0.000969808	yes
GRINA	356.642	186.52	-0.935144	-4.00767	5e-05	0.000969808	yes
CYFIP2	7.72681	4.03987	-0.935563	-3.39967	5e-05	0.000969808	yes
ANTXR1	30.3352	15.8069	-0.940438	-3.97771	5e-05	0.000969808	yes
DHRS3	74.583	38.8607	-0.940536	-3.98801	5e-05	0.000969808	yes
MFGE8	128.413	66.8102	-0.942652	-4.10454	5e-05	0.000969808	yes
MAOA	44.7059	23.2021	-0.946208	-4.17984	5e-05	0.000969808	yes
UBA7	5.15066	2.66807	-0.948963	-2.98251	5e-05	0.000969808	yes
TNS3	19.4894	10.0818	-0.950928	-4.23772	5e-05	0.000969808	yes
COL6A1	7.14694	3.69656	-0.951142	-3.81806	5e-05	0.000969808	yes
NTN4	9.78788	5.06187	-0.951327	-3.60834	5e-05	0.000969808	yes
STOM	127.942	66.1364	-0.951972	-2.93886	5e-05	0.000969808	yes
CSF1	9.31538	4.80664	-0.954587	-3.72547	5e-05	0.000969808	yes
LIMK2	16.154	8.3256	-0.95627	-4.00874	5e-05	0.000969808	yes
ASS1	78.1694	40.2561	-0.957397	-4.19764	5e-05	0.000969808	yes
KITLG	5.19017	2.66611	-0.961045	-3.54881	5e-05	0.000969808	yes
IKZF2	5.03642	2.58702	-0.961106	-3.74974	5e-05	0.000969808	yes
JUND	35.2564	18.0939	-0.962383	-4.11528	5e-05	0.000969808	yes
RPS6KA2	30.9684	15.8713	-0.964372	-4.27382	5e-05	0.000969808	yes
PMEPA1	20.0587	10.2716	-0.965567	-4.14609	5e-05	0.000969808	yes
SYDE2	5.00108	2.56074	-0.965676	-2.93475	5e-05	0.000969808	yes
AHR	7.89241	4.03601	-0.967537	-3.5809	5e-05	0.000969808	yes
GCNT1	25.7374	13.131	-0.970891	-3.54167	5e-05	0.000969808	yes
SYTL1	10.9422	5.57643	-0.972488	-3.12888	5e-05	0.000969808	yes
PLAT	23.0774	11.7343	-0.975751	-3.8396	5e-05	0.000969808	yes
FDXR	12.1905	6.19229	-0.977206	-3.74157	5e-05	0.000969808	yes
ST6GAL1	5.51826	2.80229	-0.977608	-3.59096	5e-05	0.000969808	yes
FZD2	8.47932	4.30498	-0.977942	-3.76135	5e-05	0.000969808	yes
NINJ1	48.5777	24.6595	-0.97815	-4.13277	5e-05	0.000969808	yes
ARID5B	3.44067	1.74385	-0.980414	-3.65422	5e-05	0.000969808	yes
ZNF395	18.4477	9.33685	-0.982433	-4.16229	5e-05	0.000969808	yes
TOB1	22.73	11.4878	-0.984501	-3.87718	5e-05	0.000969808	yes
OTUD1	3.009	1.51903	-0.986135	-2.97924	5e-05	0.000969808	yes
EGFR	45.4468	22.9167	-0.987782	-2.69267	5e-05	0.000969808	yes
ARHGAP8,PRR5,PRR5-ARHGAP8	9.70711	4.89434	-0.987928	-3.19675	5e-05	0.000969808	yes
SAMD4A	16.6952	8.41463	-0.988458	-3.81147	5e-05	0.000969808	yes
TRAM1	255.279	128.321	-0.992321	-4.41797	5e-05	0.000969808	yes
IRX3	20.9506	10.494	-0.99743	-3.44593	5e-05	0.000969808	yes
LPIN1	22.7943	11.3937	-1.00044	-4.30447	5e-05	0.000969808	yes
NEBL	9.85012	4.92157	-1.00102	-4.04873	5e-05	0.000969808	yes
PLEKHA6	13.1437	6.56138	-1.0023	-3.80611	5e-05	0.000969808	yes
NRCAM	12.7048	6.33822	-1.00323	-4.23401	5e-05	0.000969808	yes
TMEM63C	2.46279	1.22829	-1.00364	-3.25238	5e-05	0.000969808	yes
SYNPO	12.0456	6.00224	-1.00494	-3.16819	5e-05	0.000969808	yes
TNS4	86.5404	43.0231	-1.00826	-4.27457	5e-05	0.000969808	yes
ALDH3B1	35.7546	17.7525	-1.01011	-4.3765	5e-05	0.000969808	yes
LRIG3	4.26133	2.10929	-1.01454	-3.51777	5e-05	0.000969808	yes
HS6ST1	13.5315	6.69557	-1.01504	-4.24292	5e-05	0.000969808	yes
INADL	5.33001	2.63612	-1.01573	-3.72534	5e-05	0.000969808	yes
PEG10	22.6467	11.1961	-1.01631	-4.49681	5e-05	0.000969808	yes
PIK3R3	5.32978	2.62635	-1.02101	-3.77657	5e-05	0.000969808	yes
FADS3	64.2377	31.5504	-1.02576	-4.39769	5e-05	0.000969808	yes
PTPRK	16.3609	8.03452	-1.02597	-4.41972	5e-05	0.000969808	yes
PICK1	11.7778	5.74426	-1.03588	-3.14358	5e-05	0.000969808	yes
SFN	123.179	59.8013	-1.04251	-4.67951	5e-05	0.000969808	yes
ANXA3	93.2284	45.2037	-1.04433	-4.55083	5e-05	0.000969808	yes
MPP5	27.0695	13.1205	-1.04485	-4.32704	5e-05	0.000969808	yes
FLVCR2	8.62427	4.17792	-1.04562	-3.27525	5e-05	0.000969808	yes
GJB3	23.4078	11.323	-1.04773	-4.28009	5e-05	0.000969808	yes
CNKSR3	2.25469	1.08859	-1.05048	-3.12942	5e-05	0.000969808	yes
SPTLC3	6.28472	3.03083	-1.05213	-2.72173	5e-05	0.000969808	yes
FUCA1	8.25598	3.97436	-1.05472	-3.46161	5e-05	0.000969808	yes
PLSCR4	3.9947	1.91611	-1.0599	-3.18175	5e-05	0.000969808	yes
PDZD2	2.85773	1.36439	-1.06661	-4.04059	5e-05	0.000969808	yes
ENPP1	2.54771	1.21564	-1.06749	-3.65239	5e-05	0.000969808	yes
PLEKHA2	25.7732	12.2952	-1.06778	-4.584	5e-05	0.000969808	yes
DAB2IP	6.47395	3.08394	-1.06987	-4.26491	5e-05	0.000969808	yes
MAP3K1	3.83667	1.81844	-1.07715	-3.61277	5e-05	0.000969808	yes
IL18	156.87	74.2107	-1.07987	-4.55803	5e-05	0.000969808	yes
CEBPD	25.0504	11.8284	-1.08257	-4.36257	5e-05	0.000969808	yes
HHAT	3.68134	1.73761	-1.08313	-3.43042	5e-05	0.000969808	yes
JAG2,NUDT14	27.5581	12.984	-1.08574	-3.13731	5e-05	0.000969808	yes
PRKAG2	140.915	66.3898	-1.08579	-4.72678	5e-05	0.000969808	yes
OPN3	124.803	58.4305	-1.09486	-4.33805	5e-05	0.000969808	yes
IFNGR1	78.2383	36.5899	-1.09643	-4.79496	5e-05	0.000969808	yes
MB21D2	5.76826	2.69144	-1.09976	-3.66863	5e-05	0.000969808	yes
F12	20.8746	9.72811	-1.10152	-3.91677	5e-05	0.000969808	yes
JPH1	4.54828	2.10931	-1.10855	-3.10792	5e-05	0.000969808	yes
DST	36.9793	17.1158	-1.11139	-4.53541	5e-05	0.000969808	yes
PLCB4	4.87111	2.24856	-1.11525	-3.8765	5e-05	0.000969808	yes
MAPK13	3.79633	1.75031	-1.11699	-3.01443	5e-05	0.000969808	yes
FAT4	5.51775	2.53211	-1.12374	-3.6178	5e-05	0.000969808	yes
CNN2	76.1738	34.9435	-1.12427	-4.9799	5e-05	0.000969808	yes
ALDH6A1	4.61395	2.10555	-1.1318	-3.87787	5e-05	0.000969808	yes
MID1	4.22411	1.91566	-1.1408	-3.90737	5e-05	0.000969808	yes
GLUD1	228.494	103.568	-1.14157	-5.01022	5e-05	0.000969808	yes
MYEF2	4.97593	2.24188	-1.15025	-2.82206	5e-05	0.000969808	yes
PKP3	33.0729	14.9004	-1.1503	-4.75723	5e-05	0.000969808	yes
GABRE	8.57927	3.85298	-1.15488	-4.04127	5e-05	0.000969808	yes
SEMA3B	13.7632	6.16878	-1.15776	-4.28439	5e-05	0.000969808	yes
TMEM139	2.81496	1.25034	-1.17079	-3.03852	5e-05	0.000969808	yes
RASSF7	13.3726	5.9275	-1.17378	-4.30772	5e-05	0.000969808	yes
LIMA1	40.0001	17.6223	-1.1826	-5.20474	5e-05	0.000969808	yes
SEPP1	19.4086	8.54688	-1.18323	-4.55894	5e-05	0.000969808	yes
EEF2K	15.4002	6.76444	-1.18691	-4.38156	5e-05	0.000969808	yes
TPM1	107.362	47.0055	-1.19158	-4.93735	5e-05	0.000969808	yes
GAS6	63.0196	27.4895	-1.19692	-4.88712	5e-05	0.000969808	yes
JUP	39.9127	17.399	-1.19784	-5.21622	5e-05	0.000969808	yes
PTPRF	17.6878	7.68131	-1.20333	-5.3	5e-05	0.000969808	yes
IFI30	20.101	8.71589	-1.20555	-4.31065	5e-05	0.000969808	yes
TCEA2	12.7386	5.5181	-1.20696	-4.10052	5e-05	0.000969808	yes
SLC25A23	4.24594	1.83874	-1.20737	-4.20787	5e-05	0.000969808	yes
LPAR2	6.8614	2.97089	-1.20761	-3.62675	5e-05	0.000969808	yes
ANGPT1	3.71434	1.60638	-1.20929	-4.07235	5e-05	0.000969808	yes
EIF3H	3.89096	1.68053	-1.21121	-3.24556	5e-05	0.000969808	yes
CTSH	25.7816	11.0961	-1.21628	-4.78519	5e-05	0.000969808	yes
EIF2AK3	7.59152	3.25265	-1.22277	-4.599	5e-05	0.000969808	yes
C11orf1	17.7307	7.58909	-1.22425	-3.58607	5e-05	0.000969808	yes
SGPP2	6.64992	2.84013	-1.22738	-3.18775	5e-05	0.000969808	yes
DSC2	3.11295	1.32849	-1.22849	-3.95161	5e-05	0.000969808	yes
ADRB2	11.9623	5.10219	-1.2293	-3.70214	5e-05	0.000969808	yes
DLG5	64.7158	27.5849	-1.23024	-5.15043	5e-05	0.000969808	yes
ADA	19.0583	8.10695	-1.23319	-4.75507	5e-05	0.000969808	yes
P2RY2	2.0882	0.882369	-1.24281	-3.04213	5e-05	0.000969808	yes
BTG2	6.568	2.73548	-1.26366	-4.22385	5e-05	0.000969808	yes
NEURL1B	4.03956	1.6797	-1.26599	-3.96326	5e-05	0.000969808	yes
DSP	29.8076	12.2955	-1.27755	-5.61687	5e-05	0.000969808	yes
NPAS2	7.25824	2.98341	-1.28266	-3.19381	5e-05	0.000969808	yes
ASAP3,TCEA3	6.37847	2.62109	-1.28304	-4.09246	5e-05	0.000969808	yes
PAWR	26.4525	10.8676	-1.28337	-5.43123	5e-05	0.000969808	yes
HSPG2	32.485	13.3164	-1.28657	-5.67805	5e-05	0.000969808	yes
MMP15	2.15037	0.880285	-1.28854	-4.06299	5e-05	0.000969808	yes
FOXN3	8.7653	3.56098	-1.29953	-5.2698	5e-05	0.000969808	yes
DDR1	21.1564	8.58562	-1.3011	-5.43123	5e-05	0.000969808	yes
TSC22D3	62.6123	25.2749	-1.30874	-5.61181	5e-05	0.000969808	yes
RUNX2	4.03539	1.61935	-1.31729	-3.80354	5e-05	0.000969808	yes
ARHGEF3	6.50027	2.60284	-1.32041	-4.73005	5e-05	0.000969808	yes
GPR87	32.3421	12.9119	-1.32472	-5.0138	5e-05	0.000969808	yes
PLD5	31.1299	12.4175	-1.32593	-5.07621	5e-05	0.000969808	yes
F2R	14.2251	5.6457	-1.33322	-5.25322	5e-05	0.000969808	yes
WNT5A	22.2254	8.77616	-1.34055	-4.64174	5e-05	0.000969808	yes
FBN1	9.85014	3.86881	-1.34825	-5.69671	5e-05	0.000969808	yes
HSD11B1L	3.2252	1.26653	-1.3485	-3.47769	5e-05	0.000969808	yes
C9orf3	16.4034	6.43142	-1.35079	-4.20328	5e-05	0.000969808	yes
LPHN1	5.28763	2.06039	-1.3597	-3.80153	5e-05	0.000969808	yes
CLMN	2.39511	0.932527	-1.36087	-3.60297	5e-05	0.000969808	yes
SEMA3C	38.7135	15.0721	-1.36095	-5.89016	5e-05	0.000969808	yes
RBP4	8.29868	3.22752	-1.36245	-3.86616	5e-05	0.000969808	yes
RGS11	2.78343	1.08164	-1.36365	-3.37642	5e-05	0.000969808	yes
ALDH3A1	8.93554	3.46404	-1.3671	-4.61408	5e-05	0.000969808	yes
ARHGAP29	18.7373	7.2473	-1.3704	-6.02518	5e-05	0.000969808	yes
MAP3K9	6.1089	2.35981	-1.37224	-3.90739	5e-05	0.000969808	yes
MSLN	41.5865	16.0002	-1.37803	-5.30811	5e-05	0.000969808	yes
RBMS3	4.04862	1.55712	-1.37855	-4.12825	5e-05	0.000969808	yes
PLK2	35.9022	13.7708	-1.38246	-4.87852	5e-05	0.000969808	yes
TM7SF2	7.74548	2.96777	-1.38398	-3.44568	5e-05	0.000969808	yes
NFIL3	20.9863	8.01423	-1.38881	-5.34768	5e-05	0.000969808	yes
GBP2	4.44102	1.69353	-1.39086	-4.38129	5e-05	0.000969808	yes
PCSK6	5.73792	2.18393	-1.3936	-4.02192	5e-05	0.000969808	yes
TFCP2L1	14.1278	5.35512	-1.39955	-5.99105	5e-05	0.000969808	yes
F11R,TSTD1	46.1442	17.4789	-1.40053	-3.07819	5e-05	0.000969808	yes
LOC100505783	2.10337	0.785414	-1.42118	-2.63899	5e-05	0.000969808	yes
PTPLB	69.4697	25.8526	-1.42607	-6.29079	5e-05	0.000969808	yes
C10orf47	14.4971	5.39025	-1.42734	-5.45372	5e-05	0.000969808	yes
FGD4	8.73481	3.22965	-1.4354	-5.78011	5e-05	0.000969808	yes
LAPTM5	25.1081	9.22075	-1.4452	-4.06033	5e-05	0.000969808	yes
CADM4	2.26701	0.829455	-1.45056	-3.20634	5e-05	0.000969808	yes
EPS8L2	31.9886	11.6581	-1.45622	-4.55543	5e-05	0.000969808	yes
S1PR1	3.78729	1.36481	-1.47246	-4.44118	5e-05	0.000969808	yes
PAPSS2	6.76961	2.43414	-1.47566	-5.26634	5e-05	0.000969808	yes
TCEAL3	38.1597	13.7201	-1.47576	-5.95525	5e-05	0.000969808	yes
TINAGL1	14.2765	5.13132	-1.47624	-5.46479	5e-05	0.000969808	yes
EFNB3	2.24765	0.807679	-1.47656	-3.91894	5e-05	0.000969808	yes
SYNE2	10.1595	3.63087	-1.48444	-5.38662	5e-05	0.000969808	yes
BDNF	5.05043	1.79837	-1.48972	-4.71707	5e-05	0.000969808	yes
METTL7A	27.5461	9.80043	-1.49093	-6.12478	5e-05	0.000969808	yes
JUB	26.1858	9.23718	-1.50326	-6.06599	5e-05	0.000969808	yes
CITED2	43.8261	15.1775	-1.52985	-6.33131	5e-05	0.000969808	yes
GATA3	10.1211	3.49276	-1.53493	-5.44288	5e-05	0.000969808	yes
LAMC2	132.249	45.5016	-1.53926	-6.26058	5e-05	0.000969808	yes
IGSF3	3.56894	1.22596	-1.54158	-5.48781	5e-05	0.000969808	yes
FOSL2	46.6362	15.9954	-1.54379	-6.71543	5e-05	0.000969808	yes
ITGB2	17.109	5.86336	-1.54496	-4.05462	5e-05	0.000969808	yes
TCEAL1	39.3051	13.3621	-1.55657	-5.84523	5e-05	0.000969808	yes
C2orf55	2.18527	0.740247	-1.56173	-3.39586	5e-05	0.000969808	yes
HAPLN3	2.02996	0.683228	-1.57101	-3.23311	5e-05	0.000969808	yes
ALDH1A3	23.924	8.02348	-1.57616	-5.90709	5e-05	0.000969808	yes
KRT15	10.2361	3.41536	-1.58355	-5.0692	5e-05	0.000969808	yes
TP53	31.4942	10.4791	-1.58757	-4.98808	5e-05	0.000969808	yes
MBP	3.48009	1.15663	-1.5892	-5.14203	5e-05	0.000969808	yes
NRP2	10.8046	3.58535	-1.59145	-4.47614	5e-05	0.000969808	yes
MOSC1	3.41919	1.13321	-1.59324	-4.18215	5e-05	0.000969808	yes
RTN4R	3.99603	1.32349	-1.59422	-4.6319	5e-05	0.000969808	yes
C1orf226,NOS1AP	2.61284	0.861056	-1.60144	-4.7773	5e-05	0.000969808	yes
LOXL1	4.37158	1.43688	-1.60522	-3.72616	5e-05	0.000969808	yes
RNF144B	5.93284	1.91626	-1.63043	-5.82457	5e-05	0.000969808	yes
LYPD6	3.90728	1.259	-1.63389	-4.32107	5e-05	0.000969808	yes
PCDH9	7.70296	2.46836	-1.64186	-5.53819	5e-05	0.000969808	yes
C1S	3.11466	0.994085	-1.64763	-4.76937	5e-05	0.000969808	yes
INPP4B	3.09294	0.980138	-1.65792	-4.83202	5e-05	0.000969808	yes
KRT14,KRT16	4.93853	1.55988	-1.66264	-4.24862	5e-05	0.000969808	yes
PDZK1IP1	7.55352	2.37356	-1.67009	-4.43454	5e-05	0.000969808	yes
SLC44A3	1.94156	0.609609	-1.67126	-3.48494	5e-05	0.000969808	yes
SAMD10	2.29181	0.7166	-1.67725	-3.99805	5e-05	0.000969808	yes
NOXA1	3.8575	1.19761	-1.68751	-3.78185	5e-05	0.000969808	yes
PLA2G16	5.14668	1.57978	-1.70392	-4.82982	5e-05	0.000969808	yes
PRSS16	4.65011	1.40877	-1.72283	-4.62243	5e-05	0.000969808	yes
FBXO32	8.41928	2.54435	-1.7264	-3.98724	5e-05	0.000969808	yes
DOCK8	6.40737	1.92721	-1.73322	-4.31604	5e-05	0.000969808	yes
PLXNB1	14.2107	4.25885	-1.73844	-6.83588	5e-05	0.000969808	yes
ITGB4	151.535	45.216	-1.74474	-7.41504	5e-05	0.000969808	yes
NFYB	36.1155	10.7483	-1.74851	-4.36304	5e-05	0.000969808	yes
CFI	6.98051	2.07618	-1.7494	-5.42936	5e-05	0.000969808	yes
ALS2CL	16.4245	4.86761	-1.75457	-5.98125	5e-05	0.000969808	yes
GAB1	9.94905	2.94244	-1.75755	-5.15617	5e-05	0.000969808	yes
PDE7B	2.76792	0.813528	-1.76654	-4.10089	5e-05	0.000969808	yes
HEG1	12.2031	3.57748	-1.77023	-7.41316	5e-05	0.000969808	yes
TGFBR3	7.20811	2.11156	-1.77131	-6.73991	5e-05	0.000969808	yes
IFIT1	2.5975	0.759325	-1.77434	-4.15732	5e-05	0.000969808	yes
CA2	7.62503	2.21097	-1.78606	-5.29939	5e-05	0.000969808	yes
MEST	18.9756	5.5011	-1.78635	-5.1762	5e-05	0.000969808	yes
SLC7A5	332.585	96.4008	-1.78661	-7.73956	5e-05	0.000969808	yes
PRR5L	12.2685	3.55561	-1.78679	-4.9243	5e-05	0.000969808	yes
CADM3,DARC	165.416	47.8744	-1.78877	-5.45162	5e-05	0.000969808	yes
DTX4	3.02201	0.870898	-1.79493	-5.73658	5e-05	0.000969808	yes
C10orf54	25.0524	7.21051	-1.79678	-7.62932	5e-05	0.000969808	yes
SLPI	47.1261	13.5129	-1.80218	-6.39536	5e-05	0.000969808	yes
C3	196.703	56.3183	-1.80434	-7.83727	5e-05	0.000969808	yes
LPAR1	2.28837	0.651792	-1.81184	-3.70004	5e-05	0.000969808	yes
LOC100131825	99.5077	28.2594	-1.81608	-3.27928	5e-05	0.000969808	yes
TAGLN	40.3081	11.4206	-1.81943	-6.92968	5e-05	0.000969808	yes
LOC645638	24.6658	6.91876	-1.83393	-4.80915	5e-05	0.000969808	yes
CABLES1	2.02714	0.568128	-1.83515	-5.21855	5e-05	0.000969808	yes
FBLN1	208.107	58.0614	-1.84167	-8.26947	5e-05	0.000969808	yes
EDN1	18.9206	5.25332	-1.84866	-4.08442	5e-05	0.000969808	yes
MAP7	3.88082	1.07557	-1.85126	-5.9215	5e-05	0.000969808	yes
TUFT1	23.6659	6.55258	-1.85268	-7.42513	5e-05	0.000969808	yes
THBS1	269.282	74.4128	-1.8555	-7.83685	5e-05	0.000969808	yes
SYBU	7.39233	2.04157	-1.85635	-6.09061	5e-05	0.000969808	yes
PCDH1	1.87435	0.516784	-1.85876	-5.29216	5e-05	0.000969808	yes
SLC22A5	65.7176	18.0754	-1.86225	-5.47249	5e-05	0.000969808	yes
CLU	9.15505	2.51246	-1.86547	-6.53586	5e-05	0.000969808	yes
CDC42EP3	25.1644	6.88226	-1.87043	-7.62969	5e-05	0.000969808	yes
SCNN1A	84.0791	22.6471	-1.89242	-8.10513	5e-05	0.000969808	yes
RHPN1	6.28086	1.68771	-1.89589	-3.51168	5e-05	0.000969808	yes
PISD	63.0697	16.8617	-1.9032	-5.6909	5e-05	0.000969808	yes
ACPL2	13.8249	3.68269	-1.90844	-7.0887	5e-05	0.000969808	yes
CDS1	4.78225	1.26284	-1.92102	-6.16607	5e-05	0.000969808	yes
CCDC80	58.475	15.3132	-1.93305	-8.33496	5e-05	0.000969808	yes
EFNA1	9.42192	2.4635	-1.93531	-5.69751	5e-05	0.000969808	yes
PLEKHA7	8.92932	2.32466	-1.94153	-6.7699	5e-05	0.000969808	yes
ELMO3	9.18855	2.38987	-1.9429	-6.46462	5e-05	0.000969808	yes
IGFBP7	135.207	35.0687	-1.94692	-4.12181	5e-05	0.000969808	yes
TGM1	3.07409	0.795405	-1.9504	-4.13612	5e-05	0.000969808	yes
PALLD	54.7047	14.1303	-1.95287	-7.51366	5e-05	0.000969808	yes
SDC1	48.7609	12.5771	-1.95492	-8.49412	5e-05	0.000969808	yes
GPRC5C	5.45561	1.39993	-1.96239	-5.37478	5e-05	0.000969808	yes
PLCH2	6.39431	1.63394	-1.96843	-6.23906	5e-05	0.000969808	yes
MITF	3.84799	0.980789	-1.97209	-6.1298	5e-05	0.000969808	yes
C1orf172	3.73496	0.948459	-1.97744	-5.35178	5e-05	0.000969808	yes
DCN	127.096	31.8996	-1.99431	-8.75666	5e-05	0.000969808	yes
GPR1	10.5632	2.63229	-2.00465	-6.40264	5e-05	0.000969808	yes
S100A2	716.936	178.486	-2.00603	-8.79671	5e-05	0.000969808	yes
TCEAL4	172.483	42.899	-2.00744	-8.8979	5e-05	0.000969808	yes
LIMCH1	28.6815	7.12808	-2.00853	-7.83881	5e-05	0.000969808	yes
CDH4	9.67352	2.38883	-2.01773	-6.67666	5e-05	0.000969808	yes
MYO5B	3.49382	0.859869	-2.02262	-3.45427	5e-05	0.000969808	yes
SLC46A3	19.8194	4.83993	-2.03386	-7.46009	5e-05	0.000969808	yes
CD82	17.3751	4.2313	-2.03785	-7.2348	5e-05	0.000969808	yes
PLXDC2	5.77712	1.3995	-2.04544	-6.29968	5e-05	0.000969808	yes
SH2D3A	11.3963	2.69754	-2.07885	-4.99849	5e-05	0.000969808	yes
SLC44A2	18.988	4.45838	-2.0905	-8.26768	5e-05	0.000969808	yes
TACSTD2	57.2056	13.3526	-2.09903	-5.36101	5e-05	0.000969808	yes
ARHGEF16	5.02804	1.17299	-2.09981	-4.0577	5e-05	0.000969808	yes
SFRP1	36.4537	8.46363	-2.10672	-8.72506	5e-05	0.000969808	yes
CFB	4.7281	1.09116	-2.1154	-6.4989	5e-05	0.000969808	yes
RNF182	3.86095	0.885296	-2.12472	-5.93258	5e-05	0.000969808	yes
RPS6KL1	2.7466	0.628604	-2.12742	-4.06246	5e-05	0.000969808	yes
SHISA9	5.86703	1.33862	-2.13188	-7.18913	5e-05	0.000969808	yes
ABI3BP	6.70847	1.51582	-2.14589	-5.84348	5e-05	0.000969808	yes
KCNIP3	14.8033	3.33893	-2.14846	-6.16141	5e-05	0.000969808	yes
SUSD2	2.22634	0.498293	-2.15961	-5.51908	5e-05	0.000969808	yes
MYPN	15.2976	3.41846	-2.16189	-8.22736	5e-05	0.000969808	yes
LOC152742	11.0523	2.44724	-2.17512	-5.98686	5e-05	0.000969808	yes
LOC100288413	8.49623	1.87523	-2.17976	-7.25037	5e-05	0.000969808	yes
KLRC2,KLRC3,KLRC4,KLRC4-KLRK1,KLRK1	5.25451	1.15819	-2.18168	-3.96104	5e-05	0.000969808	yes
MDFI	9.24139	2.00405	-2.20519	-7.04403	5e-05	0.000969808	yes
FAM46B	17.2155	3.68016	-2.22587	-8.25529	5e-05	0.000969808	yes
GJB5	21.6735	4.62296	-2.22904	-7.91844	5e-05	0.000969808	yes
CCDC120	2.74271	0.582016	-2.23647	-6.40032	5e-05	0.000969808	yes
SPINT2	76.0165	16.1114	-2.23823	-5.70123	5e-05	0.000969808	yes
TGFB2	12.1352	2.54535	-2.25326	-8.29433	5e-05	0.000969808	yes
EPB41L4A	8.41896	1.7657	-2.2534	-5.51147	5e-05	0.000969808	yes
SERINC2	79.0723	16.3396	-2.2748	-8.62361	5e-05	0.000969808	yes
FAM198B	3.67826	0.74833	-2.29728	-5.03798	5e-05	0.000969808	yes
MST1R	5.46869	1.11063	-2.29981	-7.40771	5e-05	0.000969808	yes
CDK18	6.26038	1.22538	-2.35302	-7.6486	5e-05	0.000969808	yes
DAAM1	14.9445	2.91991	-2.35562	-7.0394	5e-05	0.000969808	yes
EFEMP1	359.751	69.667	-2.36845	-10.1574	5e-05	0.000969808	yes
LLGL2	6.46215	1.23481	-2.38773	-6.40556	5e-05	0.000969808	yes
NRG1	3.016	0.575528	-2.38968	-4.29568	5e-05	0.000969808	yes
CELSR2	4.12543	0.781342	-2.40052	-8.97332	5e-05	0.000969808	yes
SLC16A14	9.51099	1.79879	-2.40257	-7.94776	5e-05	0.000969808	yes
DSC3	7.514	1.39644	-2.42783	-8.28313	5e-05	0.000969808	yes
FGFBP1	9.90761	1.83349	-2.43394	-6.86314	5e-05	0.000969808	yes
PDK4	33.8727	6.17451	-2.45573	-9.51905	5e-05	0.000969808	yes
L1CAM	8.74903	1.59353	-2.45689	-9.4287	5e-05	0.000969808	yes
XDH	2.66889	0.47946	-2.47676	-5.18192	5e-05	0.000969808	yes
MYLK	3.5375	0.634695	-2.47859	-6.91131	5e-05	0.000969808	yes
CLDN7	31.5058	5.60548	-2.49071	-4.7883	5e-05	0.000969808	yes
NUP210	6.42522	1.09003	-2.55937	-9.23297	5e-05	0.000969808	yes
CPM	2.42291	0.403169	-2.58728	-3.75725	5e-05	0.000969808	yes
TRIM29	59.0447	9.74516	-2.59905	-10.6159	5e-05	0.000969808	yes
BIK	3.35758	0.548477	-2.61392	-4.26599	5e-05	0.000969808	yes
PKP2	16.264	2.63605	-2.62523	-10.1329	5e-05	0.000969808	yes
JPH2	9.31742	1.50558	-2.62961	-6.95826	5e-05	0.000969808	yes
KSR1,LGALS9	2.18151	0.352476	-2.62973	-5.37301	5e-05	0.000969808	yes
MYL9	22.7344	3.61734	-2.65188	-9.14369	5e-05	0.000969808	yes
MAP7D2	2.31593	0.357531	-2.69545	-3.67546	5e-05	0.000969808	yes
COL12A1	20.6278	3.10579	-2.73155	-11.338	5e-05	0.000969808	yes
PRR15	3.14497	0.469993	-2.74234	-4.82562	5e-05	0.000969808	yes
PRR16	6.66607	0.980749	-2.76488	-6.86642	5e-05	0.000969808	yes
RERG	6.27318	0.908379	-2.78783	-6.33267	5e-05	0.000969808	yes
MUC1	53.7886	7.73891	-2.7971	-8.62519	5e-05	0.000969808	yes
ADAP1	2.70562	0.385018	-2.81296	-6.27124	5e-05	0.000969808	yes
RAB40A	5.01798	0.708681	-2.8239	-4.35468	5e-05	0.000969808	yes
MMP28	7.65207	1.08004	-2.82477	-5.35773	5e-05	0.000969808	yes
SNCA	28.195	3.86158	-2.86818	-4.18221	5e-05	0.000969808	yes
TMEM40	1.9427	0.265455	-2.87152	-4.93917	5e-05	0.000969808	yes
HES2	3.33493	0.449093	-2.89257	-3.19942	5e-05	0.000969808	yes
HOGA1	2.82114	0.379023	-2.89592	-5.22323	5e-05	0.000969808	yes
C19orf21	4.0504	0.543845	-2.8968	-8.39764	5e-05	0.000969808	yes
CLIC3	18.876	2.4739	-2.93169	-7.97259	5e-05	0.000969808	yes
SDC2	19.3613	2.46465	-2.97372	-10.4838	5e-05	0.000969808	yes
GPR56	3.59841	0.45582	-2.98082	-8.18462	5e-05	0.000969808	yes
RIPK4	9.20671	1.1654	-2.98187	-8.78225	5e-05	0.000969808	yes
HOOK1	3.63323	0.454357	-2.99936	-7.8272	5e-05	0.000969808	yes
PTGS1	4.31824	0.534657	-3.01376	-8.65568	5e-05	0.000969808	yes
CYP1B1-AS1	5.12366	0.628622	-3.02691	-4.17811	5e-05	0.000969808	yes
CLDN1	11.0613	1.35663	-3.02742	-9.34318	5e-05	0.000969808	yes
ETNK2	13.6363	1.64026	-3.05546	-9.87148	5e-05	0.000969808	yes
TCEAL4	2.27105	0.272951	-3.05665	-4.24698	5e-05	0.000969808	yes
POSTN	6.96513	0.835485	-3.05946	-7.88973	5e-05	0.000969808	yes
AIF1L	2.0139	0.240685	-3.06478	-6.54538	5e-05	0.000969808	yes
ABCA12	3.67865	0.431335	-3.0923	-4.76258	5e-05	0.000969808	yes
MATN2	1.95549	0.225496	-3.11635	-6.86664	5e-05	0.000969808	yes
RAB17	2.20119	0.252465	-3.12413	-4.97577	5e-05	0.000969808	yes
NXN	13.5064	1.54231	-3.13048	-10.7663	5e-05	0.000969808	yes
CYP1B1	13.706	1.5574	-3.1376	-7.44497	5e-05	0.000969808	yes
CDKN1C	11.8229	1.33893	-3.14243	-8.67992	5e-05	0.000969808	yes
TMPRSS3	1.81497	0.201508	-3.17103	-3.49333	5e-05	0.000969808	yes
FAP	15.7682	1.73612	-3.18308	-10.1136	5e-05	0.000969808	yes
IGFBP3	112.028	12.3004	-3.18708	-12.5801	5e-05	0.000969808	yes
CDC42BPG	2.97103	0.325842	-3.18872	-4.28518	5e-05	0.000969808	yes
C1orf106	3.72631	0.406926	-3.19491	-8.64095	5e-05	0.000969808	yes
BMP4	1.93433	0.209945	-3.20375	-5.15054	5e-05	0.000969808	yes
MEGF6	20.4777	2.17823	-3.23283	-7.90633	5e-05	0.000969808	yes
SVEP1	21.4599	2.18622	-3.29513	-13.5961	5e-05	0.000969808	yes
ANO9	10.6464	1.07608	-3.30651	-7.7277	5e-05	0.000969808	yes
LEPREL1	9.32818	0.930259	-3.32589	-9.7924	5e-05	0.000969808	yes
C1R	7.23121	0.719321	-3.32953	-9.1991	5e-05	0.000969808	yes
CNR1	2.84298	0.282285	-3.33218	-3.23897	5e-05	0.000969808	yes
INPP5D	4.38251	0.434015	-3.33594	-9.76725	5e-05	0.000969808	yes
PRR5L	3.70204	0.365097	-3.34197	-5.23158	5e-05	0.000969808	yes
NEDD9	2.18905	0.215276	-3.34604	-6.18075	5e-05	0.000969808	yes
PPP1R14C	5.52039	0.528576	-3.38459	-7.64025	5e-05	0.000969808	yes
MAP2	22.7824	2.137	-3.41426	-11.7346	5e-05	0.000969808	yes
TSPAN1	13.2628	1.22698	-3.43419	-7.83184	5e-05	0.000969808	yes
PTGER2	5.33466	0.473667	-3.49345	-7.86701	5e-05	0.000969808	yes
PRUNE2	3.91451	0.344374	-3.50678	-7.33916	5e-05	0.000969808	yes
PAPPA	5.88361	0.517479	-3.50713	-12.0963	5e-05	0.000969808	yes
ACSF2	11.1638	0.975695	-3.51626	-9.40655	5e-05	0.000969808	yes
CYP4B1	8.3509	0.717104	-3.54168	-8.77693	5e-05	0.000969808	yes
SMPDL3B	2.57736	0.220952	-3.54409	-5.38124	5e-05	0.000969808	yes
CCDC64	2.16474	0.183483	-3.56047	-5.50396	5e-05	0.000969808	yes
ANKRD2	9.44612	0.798868	-3.56369	-8.53939	5e-05	0.000969808	yes
EHF	2.57691	0.215938	-3.57696	-8.15975	5e-05	0.000969808	yes
EPCAM	6.98332	0.566865	-3.62284	-7.89658	5e-05	0.000969808	yes
SULF2	5.95014	0.481087	-3.62856	-8.37218	5e-05	0.000969808	yes
RASL11A	9.61592	0.722165	-3.73502	-7.92444	5e-05	0.000969808	yes
MPZL2	8.26506	0.605599	-3.77059	-8.68204	5e-05	0.000969808	yes
CBLC	3.52386	0.251231	-3.81007	-6.70227	5e-05	0.000969808	yes
GMPR	2.99436	0.207072	-3.85404	-5.25361	5e-05	0.000969808	yes
VGLL3	24.0524	1.64856	-3.86691	-15.1431	5e-05	0.000969808	yes
PPL	5.99502	0.406004	-3.8842	-12.2383	5e-05	0.000969808	yes
FAT2	2.22842	0.144703	-3.94486	-5.51534	5e-05	0.000969808	yes
LPHN3	2.49698	0.16021	-3.96215	-4.88158	5e-05	0.000969808	yes
LSR	11.9502	0.752861	-3.98851	-9.90602	5e-05	0.000969808	yes
TIMP3	27.5429	1.70211	-4.01628	-14.669	5e-05	0.000969808	yes
EPPK1	3.8675	0.238392	-4.01999	-12.2093	5e-05	0.000969808	yes
S100A14	109.016	6.30472	-4.11196	-15.2253	5e-05	0.000969808	yes
MYBPC1	8.46754	0.48486	-4.1263	-10.4358	5e-05	0.000969808	yes
KRT5,KRT6A	771.097	42.2885	-4.18857	-17.8693	5e-05	0.000969808	yes
KCNK15	2.48224	0.130563	-4.24882	-3.56116	5e-05	0.000969808	yes
EDN2	11.1706	0.579001	-4.27	-9.08157	5e-05	0.000969808	yes
GAS1	13.3422	0.686146	-4.28134	-11.375	5e-05	0.000969808	yes
SRGAP3	2.07487	0.106111	-4.28938	-6.92845	5e-05	0.000969808	yes
LAMA3	58.5351	2.90583	-4.33228	-18.1075	5e-05	0.000969808	yes
PRSS8	3.24549	0.159267	-4.34892	-7.02937	5e-05	0.000969808	yes
LOC643650,LOC728643	13.8925	0.631614	-4.45912	-9.78912	5e-05	0.000969808	yes
ST14	16.1717	0.684492	-4.56229	-14.3057	5e-05	0.000969808	yes
COL17A1	37.2939	1.53897	-4.5989	-14.9101	5e-05	0.000969808	yes
DSG3	8.69019	0.353531	-4.61948	-12.6406	5e-05	0.000969808	yes
ITGB6	12.1258	0.477815	-4.66548	-6.60938	5e-05	0.000969808	yes
PSG4	4.17156	0.160849	-4.69681	-5.82867	5e-05	0.000969808	yes
PNLIPRP3	6.2896	0.240584	-4.70835	-6.64923	5e-05	0.000969808	yes
CDH3	21.9335	0.825065	-4.73249	-15.5048	5e-05	0.000969808	yes
CD24	72.9687	2.67172	-4.77144	-16.3102	5e-05	0.000969808	yes
COL8A1	106.018	3.88135	-4.77161	-11.7741	5e-05	0.000969808	yes
COBL	1.95204	0.0625461	-4.96392	-6.98769	5e-05	0.000969808	yes
ANXA8L2	16.1294	0.511929	-4.9776	-7.09113	5e-05	0.000969808	yes
SORT1	7.45073	0.213253	-5.12674	-12.8801	5e-05	0.000969808	yes
LOC100507632	3.56043	0.100735	-5.14341	-6.87988	5e-05	0.000969808	yes
ANKRD1	36.2516	1.01338	-5.1608	-12.7193	5e-05	0.000969808	yes
KRT17	99.7954	2.6649	-5.22682	-16.2552	5e-05	0.000969808	yes
LOC642587	291.054	7.44127	-5.2896	-16.6992	5e-05	0.000969808	yes
IRF6	20.1084	0.492622	-5.35118	-14.4269	5e-05	0.000969808	yes
PLAC8	46.1685	1.10188	-5.38886	-12.1204	5e-05	0.000969808	yes
CXADR	2.4103	0.0555558	-5.43913	-5.38109	5e-05	0.000969808	yes
PTAFR	2.49282	0.0541396	-5.52495	-7.01552	5e-05	0.000969808	yes
MAL2	51.1594	0.863282	-5.88902	-13.2892	5e-05	0.000969808	yes
C1orf116	6.0595	0.100897	-5.90825	-11.9302	5e-05	0.000969808	yes
ESRP1	3.96455	0.0559401	-6.14713	-6.79282	5e-05	0.000969808	yes
ABCA8	13.9715	0.178413	-6.29112	-8.7343	5e-05	0.000969808	yes
CLCA2	26.5008	0.274877	-6.5911	-15.6146	5e-05	0.000969808	yes
WISP2	51.7396	0.512841	-6.65661	-13.0524	5e-05	0.000969808	yes
TP63	5.1818	0.0471014	-6.78154	-7.55868	5e-05	0.000969808	yes
SYT8,TNNI2	54.7064	0.159633	-8.42081	-8.90249	5e-05	0.000969808	yes
PLB1	21.1611	0.0236683	-9.80424	-3.35709	5e-05	0.000969808	yes
TRMT6	1.00653	3.71216	1.88287	3.2174	0.0001	0.00182938	yes
ARHGAP22	2.97025	8.10739	1.44865	2.88116	0.0001	0.00182938	yes
C6orf141	3.03421	6.36243	1.06826	3.0587	0.0001	0.00182938	yes
TNFRSF11A	1.04774	2.06098	0.976049	2.69754	0.0001	0.00182938	yes
LRRK2	1.71842	3.36756	0.970624	3.05252	0.0001	0.00182938	yes
DNMT3A	1.55137	3.01895	0.960502	2.81323	0.0001	0.00182938	yes
CCDC41,TMCC3	4.61562	8.59604	0.897148	2.85473	0.0001	0.00182938	yes
SYT12	1.21785	2.20248	0.854791	2.70471	0.0001	0.00182938	yes
PELI1	2.25063	4.01706	0.835811	2.7499	0.0001	0.00182938	yes
RGL2	6.77583	11.994	0.823848	3.22959	0.0001	0.00182938	yes
PPAP2C	7.6002	13.3861	0.816625	2.97518	0.0001	0.00182938	yes
PPP2R3C	7.40141	12.8613	0.797159	2.88176	0.0001	0.00182938	yes
SLC35E4	3.08625	5.33679	0.790115	2.83564	0.0001	0.00182938	yes
C15orf52	10.5577	17.7623	0.750525	2.86952	0.0001	0.00182938	yes
BPGM	6.86811	11.5151	0.745547	2.64214	0.0001	0.00182938	yes
BNIP3	68.9652	115.48	0.743699	2.71472	0.0001	0.00182938	yes
MXD1	2.23583	3.73488	0.740251	2.66661	0.0001	0.00182938	yes
POPDC3	15.114	25.1877	0.736831	2.83045	0.0001	0.00182938	yes
SEMA4C	5.15906	8.41598	0.706025	2.67196	0.0001	0.00182938	yes
ASNS	17.1351	27.8119	0.69875	2.7222	0.0001	0.00182938	yes
FTH1	3209.63	5202.51	0.6968	2.6485	0.0001	0.00182938	yes
TUBB3	30.1774	48.8195	0.693986	2.95302	0.0001	0.00182938	yes
KCTD5	16.5167	26.6666	0.691111	2.91874	0.0001	0.00182938	yes
MGRN1	9.36832	15.0665	0.685481	2.94595	0.0001	0.00182938	yes
MDFIC	7.70762	12.3697	0.682455	2.75597	0.0001	0.00182938	yes
COX17	82.6478	132.386	0.679708	2.76821	0.0001	0.00182938	yes
SECISBP2	7.1782	11.4824	0.677731	2.72572	0.0001	0.00182938	yes
PNP	49.2786	78.4485	0.670785	2.70915	0.0001	0.00182938	yes
FAM136A	25.0804	39.8982	0.669766	2.77796	0.0001	0.00182938	yes
JUN	15.7237	24.9892	0.668362	2.88091	0.0001	0.00182938	yes
PLEKHG4	7.24585	11.3365	0.645751	2.65993	0.0001	0.00182938	yes
HIF1A	190.989	298.737	0.645381	2.84273	0.0001	0.00182938	yes
TGOLN2	38.3872	59.9047	0.642044	2.71965	0.0001	0.00182938	yes
SH3PXD2B	7.43653	11.5897	0.640145	2.77357	0.0001	0.00182938	yes
SHROOM1	11.4122	17.7856	0.640132	2.6632	0.0001	0.00182938	yes
PXN	81.4647	126.94	0.639903	2.65819	0.0001	0.00182938	yes
MAP1B	4.33924	6.73819	0.634919	2.72727	0.0001	0.00182938	yes
ANXA6	19.282	29.8445	0.630211	2.64127	0.0001	0.00182938	yes
ACOT7	93.3444	144.455	0.629983	2.69667	0.0001	0.00182938	yes
MSN	137.967	213.077	0.627055	2.77791	0.0001	0.00182938	yes
CERK	14.004	21.4776	0.61699	2.67777	0.0001	0.00182938	yes
NOTCH2	24.9795	38.1694	0.611675	2.73436	0.0001	0.00182938	yes
CASC4	24.7801	37.7699	0.608057	2.6336	0.0001	0.00182938	yes
LAMC1	70.0012	106.387	0.60387	2.63034	0.0001	0.00182938	yes
RDX	52.1997	79.2441	0.602263	2.72203	0.0001	0.00182938	yes
ELOVL5	106.677	70.1902	-0.603901	-2.61701	0.0001	0.00182938	yes
AFF1	15.9844	10.1511	-0.655025	-2.79568	0.0001	0.00182938	yes
ZMAT3	22.7241	14.3946	-0.658695	-2.89158	0.0001	0.00182938	yes
FGF2	17.5922	10.9011	-0.690466	-2.63656	0.0001	0.00182938	yes
FBXL16	20.2732	12.4996	-0.69769	-2.78692	0.0001	0.00182938	yes
SLC16A5	22.4855	13.7689	-0.707584	-2.67364	0.0001	0.00182938	yes
BAIAP2	37.7242	23.0886	-0.708309	-2.93096	0.0001	0.00182938	yes
B4GALNT4	13.5034	8.20811	-0.718201	-2.90703	0.0001	0.00182938	yes
TNFRSF21	7.70551	4.47796	-0.783048	-2.99933	0.0001	0.00182938	yes
ACBD4	3.41172	1.67197	-1.02895	-2.9369	0.0001	0.00182938	yes
KCNS3	3.75646	1.83262	-1.03547	-2.96347	0.0001	0.00182938	yes
IRF5	3.31771	1.50428	-1.14112	-2.92807	0.0001	0.00182938	yes
MKL1	11.6927	5.21555	-1.16472	-3.0217	0.0001	0.00182938	yes
HSD17B8	3.95868	1.65237	-1.26048	-3.11721	0.0001	0.00182938	yes
TSPAN15	1.82737	0.688329	-1.4086	-3.0794	0.0001	0.00182938	yes
GLIS1	2.46669	0.928194	-1.41008	-3.02849	0.0001	0.00182938	yes
OR10J5	8.7716	2.8265	-1.63383	-3.09938	0.0001	0.00182938	yes
LHPP	2.93849	0.935616	-1.65108	-3.05656	0.0001	0.00182938	yes
ESRP2	11.1819	1.69694	-2.72016	-3.84959	0.0001	0.00182938	yes
METTL7B	0.227313	2.41256	3.40781	4.28271	0.00015	0.00263574	yes
BEGAIN	0.821623	2.40112	1.54716	2.76023	0.00015	0.00263574	yes
AKR1CL1	1.2057	3.31912	1.46092	2.58907	0.00015	0.00263574	yes
NRGN	4.83724	9.19833	0.92719	2.88668	0.00015	0.00263574	yes
TRIM45	1.09264	2.07482	0.92517	2.5791	0.00015	0.00263574	yes
BDKRB1	4.11537	7.7156	0.906756	2.71124	0.00015	0.00263574	yes
KATNAL1	7.21492	13.2364	0.875453	2.74571	0.00015	0.00263574	yes
KIAA1949	20.521	36.7287	0.839804	2.81874	0.00015	0.00263574	yes
BCAP29	22.9994	41.0716	0.836548	2.64263	0.00015	0.00263574	yes
SLC6A6	13.4618	23.4144	0.798525	2.89743	0.00015	0.00263574	yes
KRT80	3.12093	5.42138	0.796683	2.8722	0.00015	0.00263574	yes
C17orf51	3.36307	5.75257	0.774429	2.65625	0.00015	0.00263574	yes
PTPRJ	1.88444	3.10741	0.721574	2.69163	0.00015	0.00263574	yes
BTN2A1	6.98909	11.4985	0.718272	2.80557	0.00015	0.00263574	yes
HES1	77.8437	124.67	0.679461	2.92751	0.00015	0.00263574	yes
TJP2	17.1853	27.4127	0.673668	2.8874	0.00015	0.00263574	yes
NSF	11.9888	19.0816	0.670492	2.72841	0.00015	0.00263574	yes
LOC221710	8.00512	12.7159	0.66764	2.67963	0.00015	0.00263574	yes
MLLT4	11.7973	18.6899	0.663794	2.67814	0.00015	0.00263574	yes
MOBKL2A	16.6933	26.438	0.663345	2.8584	0.00015	0.00263574	yes
DGKD	5.49767	8.66741	0.656781	2.70441	0.00015	0.00263574	yes
FERMT2	36.0948	56.824	0.654708	2.91867	0.00015	0.00263574	yes
RUSC2	9.85415	15.439	0.647776	2.75737	0.00015	0.00263574	yes
CMAS	39.8373	61.8002	0.633492	2.73173	0.00015	0.00263574	yes
IGFBP6	141.552	218.786	0.628188	2.71444	0.00015	0.00263574	yes
WASL	13.4139	20.6678	0.623654	2.61081	0.00015	0.00263574	yes
MALAT1	36.0578	55.5353	0.623094	2.7609	0.00015	0.00263574	yes
LTBP1	122.435	187.68	0.616262	2.65111	0.00015	0.00263574	yes
SGMS2	16.1587	24.7688	0.616216	2.6815	0.00015	0.00263574	yes
UFD1L	34.7078	53.1654	0.615229	2.58728	0.00015	0.00263574	yes
CD97	21.2612	32.3156	0.604006	2.64613	0.00015	0.00263574	yes
CASP4	35.9549	54.5259	0.600754	2.57635	0.00015	0.00263574	yes
IGF2R	39.4876	59.2412	0.5852	2.60126	0.00015	0.00263574	yes
TM4SF1	75.4873	112.957	0.581472	2.57516	0.00015	0.00263574	yes
LBR	58.8331	87.0814	0.565737	2.5284	0.00015	0.00263574	yes
CDC42SE2	43.1389	27.8132	-0.633221	-2.76982	0.00015	0.00263574	yes
LITAF	60.9944	39.3154	-0.633583	-2.7546	0.00015	0.00263574	yes
SLC26A6	36.0864	23.0852	-0.644485	-2.6563	0.00015	0.00263574	yes
ACADSB	7.60152	4.70647	-0.691642	-2.68661	0.00015	0.00263574	yes
ROS1	99.6143	61.0998	-0.705185	-2.86277	0.00015	0.00263574	yes
LETMD1	26.8254	16.4036	-0.70959	-2.71596	0.00015	0.00263574	yes
OPLAH	13.0672	7.94113	-0.71853	-2.79316	0.00015	0.00263574	yes
GRAMD3	14.4505	8.71808	-0.729042	-2.61008	0.00015	0.00263574	yes
NKX2-5	6.90833	3.88789	-0.829351	-2.76133	0.00015	0.00263574	yes
RNF103	2.00322	1.00078	-1.00119	-2.81425	0.00015	0.00263574	yes
C10orf10	2.6353	1.21853	-1.11282	-2.83909	0.00015	0.00263574	yes
PTPN6	7.998	3.53773	-1.17681	-3.16232	0.00015	0.00263574	yes
FAM134B	2.41995	0.954639	-1.34195	-3.52252	0.00015	0.00263574	yes
C1orf21	30.4628	10.3702	-1.55461	-2.83754	0.00015	0.00263574	yes
MAP3K8	2.56055	0.689221	-1.89341	-3.28514	0.00015	0.00263574	yes
CADPS	0.959497	3.44977	1.84615	3.07747	0.0002	0.00339708	yes
PRKAR2B	0.838554	1.83931	1.13319	2.8423	0.0002	0.00339708	yes
PI4KAP2	3.06343	6.41625	1.06658	2.60853	0.0002	0.00339708	yes
CD58	11.9613	21.2864	0.831559	2.71816	0.0002	0.00339708	yes
PGBD1	2.30797	4.09747	0.828111	2.62945	0.0002	0.00339708	yes
C10orf125	17.8921	31.2426	0.804195	2.73933	0.0002	0.00339708	yes
C11orf95	2.28153	3.95423	0.793397	2.85768	0.0002	0.00339708	yes
SNRNP48	9.05035	15.4205	0.768808	2.46259	0.0002	0.00339708	yes
SCARA3	3.20295	5.42181	0.759375	2.76717	0.0002	0.00339708	yes
TPST1	10.0846	16.9585	0.749859	2.69563	0.0002	0.00339708	yes
SLC1A1	3.16009	5.29461	0.744559	2.65831	0.0002	0.00339708	yes
TUBB2A	7.59134	12.4965	0.7191	2.75159	0.0002	0.00339708	yes
MEAF6	36.737	59.9461	0.706433	2.67225	0.0002	0.00339708	yes
CARD6	4.5452	7.2388	0.671406	2.62813	0.0002	0.00339708	yes
ARPC5L	42.2172	67.0619	0.667663	2.79585	0.0002	0.00339708	yes
CAPN2	303	472.779	0.641845	2.73288	0.0002	0.00339708	yes
SMURF2	13.3499	20.8289	0.64176	2.6994	0.0002	0.00339708	yes
VMP1	95.4176	147.853	0.631837	2.7514	0.0002	0.00339708	yes
PIP4K2A	9.32534	14.323	0.619108	2.554	0.0002	0.00339708	yes
ENG	25.0756	37.8956	0.595748	2.61671	0.0002	0.00339708	yes
GARS	65.1921	97.9381	0.587173	2.62493	0.0002	0.00339708	yes
MAP7D1	39.4157	59.1829	0.58641	2.66155	0.0002	0.00339708	yes
CALM3	123.38	180.477	0.548704	2.46544	0.0002	0.00339708	yes
SPOCK1	21.0361	13.5946	-0.629832	-2.65586	0.0002	0.00339708	yes
DMD	2.8495	1.64727	-0.790631	-2.47695	0.0002	0.00339708	yes
IQCJ,IQCJ-SCHIP1,SCHIP1	6.43545	3.62112	-0.829603	-2.57564	0.0002	0.00339708	yes
SLC2A5	3.88951	2.07613	-0.905694	-2.6018	0.0002	0.00339708	yes
ENOX1	2.60777	1.32805	-0.973505	-2.78296	0.0002	0.00339708	yes
PROM2	2.51911	1.26085	-0.998515	-2.78457	0.0002	0.00339708	yes
PCSK1N	4.39025	1.8388	-1.25554	-3.1126	0.0002	0.00339708	yes
NALCN	7.33388	2.96115	-1.30842	-2.5994	0.0002	0.00339708	yes
HIST1H4E	2.38044	0.129676	-4.19824	-4.64843	0.0002	0.00339708	yes
RFTN1	1.32707	3.99786	1.59098	2.97303	0.00025	0.00413807	yes
PTPDC1	3.26107	5.85487	0.844289	2.42849	0.00025	0.00413807	yes
PLA2G15	4.97859	8.0881	0.700064	2.61694	0.00025	0.00413807	yes
RHBDF1	9.26376	14.9026	0.685893	2.6036	0.00025	0.00413807	yes
MCAM	9.59588	15.2809	0.671242	2.7395	0.00025	0.00413807	yes
LRP12	12.5124	19.6401	0.650443	2.74409	0.00025	0.00413807	yes
FRMD8	9.21573	14.0496	0.608354	2.50633	0.00025	0.00413807	yes
EIF4EBP1	51.0842	77.5402	0.602068	2.57201	0.00025	0.00413807	yes
NDRG1	26.0643	39.5321	0.600947	2.61677	0.00025	0.00413807	yes
SDCBP	151.818	225.984	0.573881	2.58608	0.00025	0.00413807	yes
DNAJA1	80.4882	119.281	0.567508	2.54199	0.00025	0.00413807	yes
F3	135.611	90.8528	-0.577868	-2.52635	0.00025	0.00413807	yes
IFITM3	403.318	268.54	-0.586781	-2.63838	0.00025	0.00413807	yes
BMP1	27.3876	18.1012	-0.597438	-2.55742	0.00025	0.00413807	yes
WEE1	18.9574	11.869	-0.675567	-2.45763	0.00025	0.00413807	yes
DSEL	5.70009	3.52891	-0.691762	-2.59033	0.00025	0.00413807	yes
CHRNB1,FGF11,TMEM102	6.31705	3.6252	-0.80119	-2.56807	0.00025	0.00413807	yes
SPECC1	13.0364	6.97181	-0.902938	-2.54374	0.00025	0.00413807	yes
ASB9	2.43055	1.00072	-1.28025	-2.61886	0.00025	0.00413807	yes
C11orf35	2.15759	0.740076	-1.54368	-2.82344	0.00025	0.00413807	yes
PKIA	2.01143	5.66622	1.49416	2.61099	0.0003	0.00487555	yes
CNRIP1	0.843044	2.23917	1.40928	2.83133	0.0003	0.00487555	yes
IL15RA	2.12202	4.7397	1.15935	3.01886	0.0003	0.00487555	yes
TTLL7	2.38311	4.39668	0.883569	2.67121	0.0003	0.00487555	yes
B3GALNT1	4.1744	6.83743	0.711885	2.55445	0.0003	0.00487555	yes
ADAMTSL4	7.15965	11.0365	0.62432	2.52506	0.0003	0.00487555	yes
ATP13A3	40.6563	62.0055	0.608918	2.7338	0.0003	0.00487555	yes
DYRK3	6.15441	9.37777	0.607625	2.57218	0.0003	0.00487555	yes
CFL2	26.767	40.5724	0.600043	2.59401	0.0003	0.00487555	yes
TMED5	25.8761	38.7366	0.58208	2.62034	0.0003	0.00487555	yes
AP1S1	53.0535	78.798	0.570712	2.47056	0.0003	0.00487555	yes
DENND5A	16.885	24.9949	0.565888	2.48493	0.0003	0.00487555	yes
SELENBP1	18.6592	12.0772	-0.627599	-2.46719	0.0003	0.00487555	yes
PYCR1	19.013	12.1216	-0.649406	-2.6102	0.0003	0.00487555	yes
LACTB2	19.4902	12.1465	-0.682206	-2.56672	0.0003	0.00487555	yes
SPATA18	7.39998	4.47069	-0.727025	-2.70393	0.0003	0.00487555	yes
FAM107B	5.96523	3.44593	-0.791684	-2.74355	0.0003	0.00487555	yes
MILR1	2.43251	6.16193	1.34094	2.90383	0.00035	0.00556734	yes
KHDRBS3	2.9821	6.07362	1.02623	2.72496	0.00035	0.00556734	yes
GNG2	0.93926	1.87857	1.00004	2.69777	0.00035	0.00556734	yes
PHF16	1.9344	3.25601	0.751217	2.62024	0.00035	0.00556734	yes
ARHGAP27,PLEKHM1	10.5653	17.5104	0.728871	2.41133	0.00035	0.00556734	yes
MAPRE2	6.26358	9.96363	0.669684	2.5908	0.00035	0.00556734	yes
CSRNP2	7.49098	11.564	0.626412	2.55649	0.00035	0.00556734	yes
CAPG	90.1777	136.636	0.5995	2.56052	0.00035	0.00556734	yes
RASAL2	7.03234	10.6105	0.593414	2.44853	0.00035	0.00556734	yes
SC4MOL	100.258	151.069	0.59149	2.65521	0.00035	0.00556734	yes
SMS	94.3644	141.899	0.588548	2.60856	0.00035	0.00556734	yes
PPP1R10	14.4038	21.6413	0.587334	2.57766	0.00035	0.00556734	yes
MYO1B	35.8296	53.5727	0.580349	2.57369	0.00035	0.00556734	yes
RAB14	34.1361	50.8037	0.573632	2.54814	0.00035	0.00556734	yes
GDI1	42.9342	63.8871	0.573396	2.50783	0.00035	0.00556734	yes
ANKRD52	15.8223	23.3881	0.563819	2.51107	0.00035	0.00556734	yes
TMTC1	30.121	44.0627	0.548787	2.45984	0.00035	0.00556734	yes
CALD1	74.9124	50.5694	-0.566939	-2.54305	0.00035	0.00556734	yes
SCD5	10.8896	6.88216	-0.66202	-2.57138	0.00035	0.00556734	yes
HOXC13	25.0854	15.685	-0.67746	-2.49254	0.00035	0.00556734	yes
PAQR7	9.7544	6.09622	-0.678138	-2.50421	0.00035	0.00556734	yes
HSPC159	3.56694	2.03989	-0.806196	-2.59653	0.00035	0.00556734	yes
CDH24	5.74232	2.78717	-1.04283	-2.7361	0.00035	0.00556734	yes
TGM5	2.0879	0.0323967	-6.01006	-4.97075	0.00035	0.00556734	yes
ZBED2	3.38838	0.0406712	-6.38044	-4.56406	0.00035	0.00556734	yes
MCF2L2	1.24067	15.2032	3.61518	3.26103	0.0004	0.00625788	yes
CATSPER1	1.33907	3.13183	1.22578	2.72255	0.0004	0.00625788	yes
C9orf72	3.72395	7.83152	1.07246	2.7848	0.0004	0.00625788	yes
UBTD1	6.43246	10.3558	0.687	2.58213	0.0004	0.00625788	yes
EAF1	7.15582	10.9465	0.613286	2.51095	0.0004	0.00625788	yes
EFTUD1	9.15647	13.852	0.597227	2.49216	0.0004	0.00625788	yes
ITPR2	4.08839	6.11619	0.581102	2.40629	0.0004	0.00625788	yes
ANXA1	270.476	396.392	0.551429	2.47628	0.0004	0.00625788	yes
STAT2	10.5512	6.92089	-0.608383	-2.47969	0.0004	0.00625788	yes
TRAPPC9	10.4086	6.64532	-0.64736	-2.51864	0.0004	0.00625788	yes
ZNF33A	7.11443	4.53775	-0.64877	-2.55128	0.0004	0.00625788	yes
ELAVL2	3.02025	1.73471	-0.799972	-2.43094	0.0004	0.00625788	yes
NEGR1	2.4317	1.31862	-0.882938	-2.67119	0.0004	0.00625788	yes
IFT88	5.1701	8.41951	0.703544	2.52865	0.00045	0.00694389	yes
TMEM132A	11.5171	18.707	0.699803	2.4274	0.00045	0.00694389	yes
TBC1D7	11.5394	18.6341	0.691381	2.48893	0.00045	0.00694389	yes
SATB2	3.81489	6.12857	0.683909	2.55469	0.00045	0.00694389	yes
RGMB	5.99546	9.30305	0.633834	2.45312	0.00045	0.00694389	yes
CSNK1D	52.2207	79.4811	0.60599	2.56621	0.00045	0.00694389	yes
ARHGEF2	25.6483	38.657	0.591864	2.61484	0.00045	0.00694389	yes
EMP1	103.81	152.759	0.557313	2.50561	0.00045	0.00694389	yes
F2RL1	16.0356	10.6222	-0.59419	-2.40875	0.00045	0.00694389	yes
ADAMTS7	5.70483	3.62838	-0.652857	-2.52697	0.00045	0.00694389	yes
IL7R	5.46348	3.40559	-0.681915	-2.44915	0.00045	0.00694389	yes
ABTB2	5.04609	3.11183	-0.697404	-2.43385	0.00045	0.00694389	yes
THOC6	19.7729	11.6569	-0.762344	-2.52133	0.00045	0.00694389	yes
TLE4	2.37723	1.33673	-0.830573	-2.62203	0.00045	0.00694389	yes
AGFG2	9.47666	5.12313	-0.887352	-2.53823	0.00045	0.00694389	yes
LOC344595	4.64461	1.78647	-1.37845	-2.59677	0.00045	0.00694389	yes
DLK2	14.1519	3.46376	-2.03059	-3.15457	0.00045	0.00694389	yes
CCL20	2.25508	6.72701	1.57679	2.90665	0.0005	0.00764126	yes
MTRNR2L9	3.98573	8.63788	1.11583	2.5768	0.0005	0.00764126	yes
MIR210HG	1.56333	2.82246	0.852333	2.54322	0.0005	0.00764126	yes
NKX3-1	1.98806	3.446	0.793565	2.55378	0.0005	0.00764126	yes
CCNA1	3.44132	5.77356	0.746499	2.4627	0.0005	0.00764126	yes
NAV2	34.1991	52.2105	0.610383	2.59546	0.0005	0.00764126	yes
KLF7	8.19313	12.238	0.578877	2.45268	0.0005	0.00764126	yes
TNIP1	50.9666	75.7556	0.5718	2.49827	0.0005	0.00764126	yes
PLK1	54.2122	79.5931	0.554025	2.46939	0.0005	0.00764126	yes
HK1	69.8999	100.897	0.529519	2.39404	0.0005	0.00764126	yes
AMT	5.50928	3.50357	-0.653038	-2.39644	0.0005	0.00764126	yes
TC2N	2.1056	1.02388	-1.04019	-2.55437	0.0005	0.00764126	yes
PDCD1LG2	2.10113	4.12144	0.971981	2.43407	0.00055	0.00830759	yes
MXRA8	3.591	6.45838	0.846787	2.55892	0.00055	0.00830759	yes
SLC37A1	3.83326	6.16893	0.686449	2.39425	0.00055	0.00830759	yes
PDZD8	12.4788	19.2494	0.625332	2.493	0.00055	0.00830759	yes
HERPUD1	14.6791	22.0341	0.585972	2.41534	0.00055	0.00830759	yes
ALAS1	16.2571	24.2769	0.578517	2.44448	0.00055	0.00830759	yes
PGD	122.862	179.718	0.548699	2.44579	0.00055	0.00830759	yes
TMX4	8.15697	11.9256	0.54795	2.43596	0.00055	0.00830759	yes
TEX2	21.9233	14.8182	-0.565091	-2.42981	0.00055	0.00830759	yes
MMP2	6.24794	3.92375	-0.671146	-2.45751	0.00055	0.00830759	yes
FAS	27.5031	16.0041	-0.781154	-2.40072	0.00055	0.00830759	yes
COMTD1	12.7067	7.27969	-0.803642	-2.60965	0.00055	0.00830759	yes
HSP90AB2P	1.17159	1.99464	0.767656	2.46766	0.0006	0.00896203	yes
GDF15	12.413	19.5059	0.652062	2.52141	0.0006	0.00896203	yes
NUF2	17.3203	26.1932	0.59673	2.46477	0.0006	0.00896203	yes
FAT1	25.0555	17.2524	-0.538325	-2.31048	0.0006	0.00896203	yes
VSTM2L	16.221	10.6857	-0.602188	-2.41997	0.0006	0.00896203	yes
C8orf55	19.4434	12.7843	-0.604913	-2.49371	0.0006	0.00896203	yes
CELSR3	4.01453	2.38466	-0.75145	-2.31521	0.0006	0.00896203	yes
ZBED3	4.58328	2.71588	-0.75496	-2.23858	0.0006	0.00896203	yes
GALNTL4	5.42043	3.2057	-0.757769	-2.51125	0.0006	0.00896203	yes
SERPINB7	2.30334	1.0391	-1.14839	-2.50762	0.0006	0.00896203	yes
CHAC1	0	3.33053	inf	#NAME?	0.00065	0.00959662	yes
MIR31	1.1909	4.51497	1.92266	2.42849	0.00065	0.00959662	yes
PGAM2,POLM	10.7494	25.1219	1.22469	2.52207	0.00065	0.00959662	yes
KAT2B	3.48038	6.99515	1.00711	2.4818	0.00065	0.00959662	yes
ZNF643	1.14847	2.13453	0.894199	2.26817	0.00065	0.00959662	yes
C5orf30	7.8584	12.3225	0.648987	2.45808	0.00065	0.00959662	yes
FUT8	7.96533	12.1479	0.608895	2.44014	0.00065	0.00959662	yes
PLK3	9.01234	13.7188	0.606177	2.40189	0.00065	0.00959662	yes
ANXA5	357.071	525.4	0.557206	2.49734	0.00065	0.00959662	yes
ARF1	372.655	545.15	0.548811	2.4207	0.00065	0.00959662	yes
ATXN7L3B	21.551	31.4169	0.543783	2.35034	0.00065	0.00959662	yes
ZNF217	8.76197	5.83952	-0.585404	-2.40226	0.00065	0.00959662	yes
CCDC15,SLC37A2	15.8966	8.95146	-0.828527	-2.27787	0.00065	0.00959662	yes
PRICKLE4	2.50427	1.29253	-0.954195	-2.43582	0.00065	0.00959662	yes
DNAJC15	46.9658	23.751	-0.983619	-2.38397	0.00065	0.00959662	yes
SAT1	1.67722	15.556	3.21333	3.16815	0.0007	0.0102513	yes
FLJ43663	2.39417	4.62206	0.949008	2.51275	0.0007	0.0102513	yes
MIDN	14.5336	25.9804	0.838027	2.26086	0.0007	0.0102513	yes
CLCF1	14.7847	26.0571	0.817575	2.29613	0.0007	0.0102513	yes
SNRNP27	25.6563	39.6937	0.629596	2.43696	0.0007	0.0102513	yes
TSHZ1	6.6294	10.0553	0.601003	2.43851	0.0007	0.0102513	yes
TAOK3	8.58586	12.9396	0.591753	2.44497	0.0007	0.0102513	yes
CLIC1	256.994	381.156	0.568645	2.40217	0.0007	0.0102513	yes
ISY1,ISY1-RAB43,RAB43	12.6193	18.3462	0.539846	2.30726	0.0007	0.0102513	yes
SOAT1	18.2538	26.4339	0.534198	2.36681	0.0007	0.0102513	yes
ATP6V0A4	2.50148	1.46493	-0.771948	-2.3898	0.0007	0.0102513	yes
GOLGA2B	1.79516	0.844114	-1.0886	-2.2644	0.0007	0.0102513	yes
PRKCZ	5.53436	0.585836	-3.23985	-3.58757	0.0007	0.0102513	yes
TMEM194B	12.2896	23.7243	0.948926	2.44232	0.00075	0.0108711	yes
TAF13	23.9019	44.5241	0.89746	2.41808	0.00075	0.0108711	yes
NRBF2	8.9438	13.8132	0.627085	2.39675	0.00075	0.0108711	yes
FN1	273.262	421.511	0.625282	2.48749	0.00075	0.0108711	yes
HSPA1B	9.97522	14.9041	0.579285	2.44597	0.00075	0.0108711	yes
RAB27A	7.97989	11.9171	0.578598	2.30308	0.00075	0.0108711	yes
DBN1	44.3483	64.7032	0.544958	2.37632	0.00075	0.0108711	yes
GLT25D1	57.4439	82.4822	0.521929	2.34348	0.00075	0.0108711	yes
CCNB1IP1	34.8126	23.1529	-0.588416	-2.35278	0.00075	0.0108711	yes
ZNF561	5.17969	3.35953	-0.624607	-2.32165	0.00075	0.0108711	yes
BDH1	5.34317	3.39859	-0.652759	-2.36411	0.00075	0.0108711	yes
ZNF362	5.14274	3.17059	-0.697786	-2.30159	0.00075	0.0108711	yes
SLC1A3	3.91992	2.28099	-0.781165	-2.49766	0.00075	0.0108711	yes
IRX5	7.61361	4.33604	-0.812202	-2.20998	0.00075	0.0108711	yes
ZNF117	1.86359	0.982835	-0.923063	-2.4464	0.00075	0.0108711	yes
MARVELD2	2.43603	1.16893	-1.05934	-2.57288	0.00075	0.0108711	yes
BMP6	0.344472	42.5955	6.95017	1.96288	0.0008	0.0114741	yes
MMP17	1.28007	2.5986	1.02151	2.51431	0.0008	0.0114741	yes
ZNF92	2.33416	3.87712	0.732081	2.42554	0.0008	0.0114741	yes
TMEM41B	20.8539	32.5845	0.643867	1.73828	0.0008	0.0114741	yes
CCDC22	5.10108	7.91906	0.634527	2.3876	0.0008	0.0114741	yes
STARD3NL	32.6206	48.6509	0.576684	2.43011	0.0008	0.0114741	yes
EFHD2	40.396	59.2945	0.553686	2.47955	0.0008	0.0114741	yes
PLEKHA1	17.2967	11.5197	-0.586399	-2.2188	0.0008	0.0114741	yes
TGIF1	40.262	26.6058	-0.597677	-2.40273	0.0008	0.0114741	yes
CCDC51	20.4807	13.4268	-0.609146	-2.41514	0.0008	0.0114741	yes
HES4	12.4937	7.45616	-0.744696	-2.51965	0.0008	0.0114741	yes
LOC100288911	3.74566	1.69687	-1.14235	-2.50154	0.0008	0.0114741	yes
HSD17B11	10.6075	16.5426	0.6411	2.44378	0.00085	0.0120889	yes
IFNGR2	46.7913	71.6687	0.615104	2.39645	0.00085	0.0120889	yes
KANK2	20.9467	31.8655	0.605275	2.37452	0.00085	0.0120889	yes
PAQR3	10.8543	16.2855	0.585325	2.37784	0.00085	0.0120889	yes
SEMA4B	12.9112	19.2144	0.573568	2.46895	0.00085	0.0120889	yes
C20orf20	13.0747	19.4284	0.571392	2.30426	0.00085	0.0120889	yes
TTL	19.5478	28.3132	0.534465	2.27498	0.00085	0.0120889	yes
FAM3C	60.5872	87.7213	0.533914	2.37293	0.00085	0.0120889	yes
PTPN12	41.5559	60.0699	0.531591	2.37868	0.00085	0.0120889	yes
PON2	244.066	172.119	-0.503862	-2.27044	0.00085	0.0120889	yes
ZNF219	8.615	3.69546	-1.2211	-2.76771	0.00085	0.0120889	yes
RNU11	0	23331.4	inf	#NAME?	0.0009	0.0126957	yes
IFLTD1	0.739055	1.8068	1.28968	2.17808	0.0009	0.0126957	yes
GPR37	1.21142	2.17804	0.846337	2.42921	0.0009	0.0126957	yes
PLAU	9.10368	13.8204	0.602275	2.30488	0.0009	0.0126957	yes
GPX8	16.4866	24.1231	0.549124	2.36044	0.0009	0.0126957	yes
TXNRD1	210.568	304.821	0.533681	2.37348	0.0009	0.0126957	yes
ZDHHC7	57.4906	39.9656	-0.524566	-2.28571	0.0009	0.0126957	yes
FAM84B	5.62988	3.66855	-0.617893	-2.30636	0.0009	0.0126957	yes
GLI3	4.02904	2.61237	-0.625077	-1.97999	0.0009	0.0126957	yes
SLC27A5	13.9257	8.11163	-0.779686	-2.40274	0.0009	0.0126957	yes
LOC151009	3.17268	1.84586	-0.781406	-2.30156	0.0009	0.0126957	yes
RAB26	2.27501	1.08941	-1.06232	-2.54408	0.0009	0.0126957	yes
DUSP16	4.99259	2.30317	-1.11617	-2.49467	0.0009	0.0126957	yes
FHOD3	3.30661	7.10241	1.10296	2.51898	0.00095	0.0132855	yes
NQO1	242.49	381.886	0.655216	2.33068	0.00095	0.0132855	yes
TMED8	6.58685	9.77278	0.56918	2.37594	0.00095	0.0132855	yes
ECE1	15.3313	22.5238	0.55497	2.45238	0.00095	0.0132855	yes
SLC39A13	30.0515	43.8879	0.546385	2.34909	0.00095	0.0132855	yes
CLTC	72.0703	104.329	0.533667	2.31678	0.00095	0.0132855	yes
CALU	74.8172	107.827	0.52727	2.37727	0.00095	0.0132855	yes
CDKN1A	94.0328	133.907	0.509997	2.27023	0.00095	0.0132855	yes
LGALS3BP	95.0267	66.9285	-0.505711	-2.28365	0.00095	0.0132855	yes
DBNDD1	4.54893	1.67571	-1.44076	-2.70058	0.00095	0.0132855	yes
LPAL2	0.778817	2.05415	1.39919	2.61698	0.001	0.0138751	yes
POLR3G	11.7591	19.4744	0.727796	2.39007	0.001	0.0138751	yes
SEC14L1	17.5833	26.5967	0.597042	2.42052	0.001	0.0138751	yes
NEU1	11.746	17.7021	0.591748	2.36788	0.001	0.0138751	yes
HGS	37.0283	54.6929	0.562725	2.36555	0.001	0.0138751	yes
ITPRIPL2	9.78814	14.1731	0.534048	2.31256	0.001	0.0138751	yes
ATP6V1E1	93.5015	135.251	0.532581	2.35797	0.001	0.0138751	yes
TJP1	23.2873	16.2496	-0.519134	-2.29204	0.001	0.0138751	yes
SLC2A1	20.3554	13.7403	-0.566993	-2.37633	0.001	0.0138751	yes
CDK5RAP3	33.1749	22.3459	-0.57008	-2.26975	0.001	0.0138751	yes
C5orf38	15.6698	9.21853	-0.765376	-2.3182	0.001	0.0138751	yes
HSPA2	2.21194	1.29507	-0.77228	-2.38592	0.001	0.0138751	yes
HOOK2	6.47304	3.63157	-0.833852	-2.39258	0.001	0.0138751	yes
BBC3	2.05495	0.946233	-1.11884	-2.54087	0.001	0.0138751	yes
PF4	0.590034	3.32668	2.49521	3.14823	0.00105	0.0144966	yes
EPN2	10.2945	15.4668	0.587292	2.3579	0.00105	0.0144966	yes
MRPS5	36.158	52.8246	0.546896	2.34304	0.00105	0.0144966	yes
REXO2	67.1271	96.9325	0.530085	2.258	0.00105	0.0144966	yes
TMEM14A	57.8348	38.7479	-0.577819	-2.31745	0.00105	0.0144966	yes
SLC43A2	3.34286	2.11686	-0.659155	-2.27377	0.00105	0.0144966	yes
TFAP4	7.41988	4.63571	-0.678607	-2.36956	0.00105	0.0144966	yes
BCKDHB	15.4411	9.25403	-0.738624	-2.24521	0.00105	0.0144966	yes
NCRNA00263	4.70462	2.50359	-0.910081	-2.34131	0.00105	0.0144966	yes
MOBKL2B	2.36958	1.03206	-1.19911	-2.60045	0.00105	0.0144966	yes
SNX9	20.3737	30.2289	0.569218	2.33264	0.0011	0.0150906	yes
P4HA1	20.4043	30.0398	0.558003	2.3829	0.0011	0.0150906	yes
C4orf3	26.0916	37.9547	0.540689	2.32679	0.0011	0.0150906	yes
C6orf48	137.691	95.4194	-0.529085	-2.27511	0.0011	0.0150906	yes
ULK2	7.37034	4.85738	-0.601553	-2.28949	0.0011	0.0150906	yes
LARP6	9.60716	18.3903	0.936764	2.34174	0.00115	0.0156717	yes
ABCA6,ABCA9	5.67136	9.12466	0.686075	2.2706	0.00115	0.0156717	yes
CYP4F11	4.14961	6.57192	0.663339	2.29027	0.00115	0.0156717	yes
DOCK11	1.77638	2.79404	0.653414	2.35078	0.00115	0.0156717	yes
SNX25	6.27471	9.49963	0.598322	2.30485	0.00115	0.0156717	yes
GBP1	10.9657	7.38872	-0.569599	-2.25845	0.00115	0.0156717	yes
TP53I3	51.8942	33.5472	-0.629379	-2.42262	0.00115	0.0156717	yes
TMTC2	4.89378	3.10084	-0.658289	-2.27476	0.00115	0.0156717	yes
PRSS23	2.20961	1.22273	-0.853692	-2.50889	0.00115	0.0156717	yes
RARRES3	2.93858	1.27337	-1.20647	-2.38298	0.00115	0.0156717	yes
SLC35A1	8.17705	13.2178	0.69283	2.39414	0.0012	0.0162563	yes
UHRF1BP1L	6.80177	10.3007	0.598755	2.30884	0.0012	0.0162563	yes
TNFRSF1A	77.8125	113.094	0.539444	2.30436	0.0012	0.0162563	yes
GBE1	46.6747	66.6227	0.513374	2.27417	0.0012	0.0162563	yes
CDCA7L	22.0828	14.3656	-0.620298	-2.3754	0.0012	0.0162563	yes
SLC2A9	7.98277	4.64532	-0.781111	-2.28627	0.0012	0.0162563	yes
P4HTM	12.0086	6.34314	-0.920796	-2.42554	0.0012	0.0162563	yes
PTGS2	1.31132	2.27654	0.795824	2.4195	0.00125	0.0168575	yes
LTBP3	27.2675	42.1839	0.629509	2.34396	0.00125	0.0168575	yes
PAK1	9.63203	14.1885	0.558809	2.30166	0.00125	0.0168575	yes
APLP2	240.988	347.557	0.528287	2.29666	0.00125	0.0168575	yes
FZD6	56.6229	39.3202	-0.526114	-2.26835	0.00125	0.0168575	yes
DFNB31	3.54749	2.07284	-0.775189	-2.29323	0.00125	0.0168575	yes
SFR1	4.79131	7.94121	0.728937	2.31932	0.0013	0.0174172	yes
PMP22	4.41703	7.2507	0.715042	2.30101	0.0013	0.0174172	yes
RPN1	120.454	171.801	0.512255	2.30456	0.0013	0.0174172	yes
MEGF8	10.037	6.94727	-0.530805	-2.22147	0.0013	0.0174172	yes
IRX2	33.9226	23.247	-0.545202	-2.3216	0.0013	0.0174172	yes
LACTB	19.7655	12.8446	-0.621821	-2.18282	0.0013	0.0174172	yes
LNX2	5.25783	3.38691	-0.6345	-2.33205	0.0013	0.0174172	yes
ALDH4A1	3.81559	2.2672	-0.750996	-2.14239	0.0013	0.0174172	yes
ATP7A	2.62937	4.18285	0.669768	2.2778	0.00135	0.017985	yes
MZT1	27.872	40.5898	0.542304	2.29207	0.00135	0.017985	yes
MYO9B	9.13954	13.0948	0.518796	2.24537	0.00135	0.017985	yes
MYO1E	27.5142	19.2872	-0.512537	-2.25817	0.00135	0.017985	yes
DHTKD1	10.0965	6.9663	-0.535387	-2.22772	0.00135	0.017985	yes
GALNT4,POC1B,POC1B-GALNT4	8.45947	12.809	0.598515	2.27583	0.0014	0.0185654	yes
ARSB	8.84269	13.3413	0.593342	2.24023	0.0014	0.0185654	yes
CEP70	16.4083	10.4877	-0.645726	-2.32116	0.0014	0.0185654	yes
ZNF48	3.18851	1.93852	-0.717929	-2.24719	0.0014	0.0185654	yes
SUGT1	34.0464	49.4797	0.539338	2.27972	0.00145	0.0191502	yes
PDPN	19.4819	13.3549	-0.544764	-2.21924	0.00145	0.0191502	yes
EIF3F	1.94404	1.18149	-0.718453	-2.2343	0.00145	0.0191502	yes
SLC25A15	8.13506	12.3561	0.602999	2.33594	0.0015	0.0197236	yes
FAM8A1	9.93629	14.6649	0.561591	2.34046	0.0015	0.0197236	yes
ABL2	9.57795	13.5763	0.503306	2.14436	0.0015	0.0197236	yes
KREMEN1	2.07533	1.34628	-0.624364	-2.1617	0.0015	0.0197236	yes
ABCA7	3.80594	2.34193	-0.700555	-2.30376	0.0015	0.0197236	yes
BEND7	3.69967	2.16968	-0.769914	-2.18819	0.0015	0.0197236	yes
IFIH1	2.30596	1.30486	-0.821475	-2.26065	0.0015	0.0197236	yes
ELOVL4	6.86907	11.2805	0.715648	2.28539	0.00155	0.0202783	yes
HSPA8	821.28	1198.41	0.545182	2.26756	0.00155	0.0202783	yes
RNF145	37.9511	26.6596	-0.509486	-2.23374	0.00155	0.0202783	yes
SCPEP1	45.5331	31.8431	-0.515937	-2.21998	0.00155	0.0202783	yes
TPD52L1	9.55676	5.91188	-0.692904	-2.33786	0.00155	0.0202783	yes
NMB	4.66318	8.27829	0.828019	2.26712	0.0016	0.0208206	yes
PARP2	9.24865	13.9459	0.592523	2.26517	0.0016	0.0208206	yes
ACVR1B	5.46909	8.09373	0.565504	2.03283	0.0016	0.0208206	yes
PDE8A	9.05727	13.3082	0.555163	2.24316	0.0016	0.0208206	yes
FAM171A1	7.47168	10.8894	0.543423	2.25029	0.0016	0.0208206	yes
VPS25	36.6217	53.0741	0.535307	2.25301	0.0016	0.0208206	yes
PSTPIP2	7.19725	4.76371	-0.595359	-2.23261	0.0016	0.0208206	yes
CERCAM	6.7916	4.40716	-0.6239	-2.21884	0.0016	0.0208206	yes
LOC100505761	4.75895	2.63051	-0.855301	-2.21358	0.0016	0.0208206	yes
FAM198B	2.2172	0.351019	-2.65912	-2.99878	0.0016	0.0208206	yes
ATP8B2	4.82866	7.26448	0.589236	2.25653	0.00165	0.0214176	yes
ACO1	15.6315	22.4294	0.520938	2.26184	0.00165	0.0214176	yes
ID1	262.581	374.04	0.510426	2.29607	0.00165	0.0214176	yes
MET	25.5472	36.2627	0.50532	2.25167	0.00165	0.0214176	yes
OAS1	5.7864	3.24851	-0.832886	-2.12461	0.00165	0.0214176	yes
TP53TG1	22.2073	10.2701	-1.11258	-2.34253	0.00165	0.0214176	yes
CDKN1B	11.6225	7.79317	-0.576632	-2.20228	0.0017	0.0219896	yes
PODXL2	11.4644	7.64569	-0.584439	-2.27471	0.0017	0.0219896	yes
KIAA1539	12.2723	17.8969	0.544305	2.22191	0.00175	0.0225353	yes
RPS6KC1	11.0578	15.9413	0.527707	2.23539	0.00175	0.0225353	yes
VPS4A	42.3158	59.2859	0.486494	2.15156	0.00175	0.0225353	yes
FAM123B	2.21029	1.46974	-0.588671	-2.1749	0.00175	0.0225353	yes
TRAF3IP2	16.0701	10.3172	-0.639333	-2.22421	0.00175	0.0225353	yes
FRAT2	7.32169	4.67155	-0.648274	-2.30267	0.00175	0.0225353	yes
PAPLN	4.22351	0.499586	-3.07964	-1.49293	0.00175	0.0225353	yes
PXDNL	0.26404	2.61733	3.30927	3.69414	0.0018	0.0230876	yes
GAB3	1.28413	2.11124	0.717303	2.23703	0.0018	0.0230876	yes
ST3GAL2	4.37244	6.47219	0.565813	2.19478	0.0018	0.0230876	yes
NTAN1	28.6362	42.1724	0.558461	2.25312	0.0018	0.0230876	yes
PROCR	36.4198	52.4729	0.526847	2.26475	0.0018	0.0230876	yes
GPR125	21.8444	15.5058	-0.494454	-2.14212	0.0018	0.0230876	yes
ELL2	42.1426	29.3936	-0.51978	-2.22193	0.0018	0.0230876	yes
GPD1L	9.26351	6.30744	-0.554504	-2.20697	0.0018	0.0230876	yes
CYP39A1	3.07632	1.25781	-1.29029	-2.29978	0.0018	0.0230876	yes
DUSP10	5.67136	8.87504	0.646058	2.26195	0.00185	0.02362	yes
CSGALNACT1	7.82223	11.6998	0.580827	2.21276	0.00185	0.02362	yes
TUSC3	47.9194	69.7097	0.540748	2.16783	0.00185	0.02362	yes
TCIRG1	14.2409	20.4696	0.523449	2.19537	0.00185	0.02362	yes
NACC2	9.59698	13.3915	0.480664	2.09963	0.00185	0.02362	yes
SCARB1	97.1097	67.5863	-0.522886	-2.24518	0.00185	0.02362	yes
C6orf145	18.1178	12.0489	-0.588507	-2.23142	0.00185	0.02362	yes
PLXNA3	15.5894	25.2694	0.696827	1.74989	0.0019	0.0241633	yes
GAMT	5.27623	3.00327	-0.812974	-2.35945	0.0019	0.0241633	yes
LOC678655	4.96359	2.80863	-0.821517	-2.192	0.0019	0.0241633	yes
GCNT2	1.10996	2.58511	1.21972	2.58688	0.00195	0.0246904	yes
SKIL	16.7103	24.7492	0.566643	1.94014	0.00195	0.0246904	yes
RAD51D,RFFL	10.4186	15.2728	0.551804	2.18163	0.00195	0.0246904	yes
ZAK	51.1341	71.626	0.486197	2.15169	0.00195	0.0246904	yes
MRAS	2.93667	1.85285	-0.664433	-2.19571	0.00195	0.0246904	yes
LTBP1	0.0434822	3.62208	6.38025	0.859158	0.002	0.0252619	yes
C9orf125	5.98506	9.55576	0.675005	2.20363	0.002	0.0252619	yes
C20orf194	2.01064	3.09819	0.62377	2.274	0.002	0.0252619	yes
DCK	18.9459	27.7106	0.548554	2.24606	0.002	0.0252619	yes
ACACA	18.983	13.4954	-0.492244	-2.17564	0.002	0.0252619	yes
CHMP4C	5.71051	3.601	-0.665222	-2.19459	0.002	0.0252619	yes
BRAF	4.10866	6.28726	0.613763	2.24376	0.00205	0.0258014	yes
SLC25A25	5.40206	8.01261	0.568763	2.22465	0.00205	0.0258014	yes
ETV3	7.58799	11.197	0.561319	2.1391	0.00205	0.0258014	yes
CNKSR1	5.7066	3.49086	-0.70905	-2.2234	0.00205	0.0258014	yes
TNIK	2.20075	3.6449	0.727887	2.05606	0.0021	0.0263286	yes
FAM40B,LOC100287482	6.73772	10.9954	0.706564	2.27271	0.0021	0.0263286	yes
LOC100506930	9.27039	5.69117	-0.703904	-2.23255	0.0021	0.0263286	yes
TRIML2	4.60496	2.59947	-0.824971	-2.23836	0.0021	0.0263286	yes
LMCD1	2.52985	1.32726	-0.930603	-2.18294	0.0021	0.0263286	yes
JUB	2.59989	1.31771	-0.980414	-2.2344	0.0021	0.0263286	yes
STX2	16.8832	24.9584	0.563934	2.18988	0.00215	0.026869	yes
NKAP	9.11742	13.4521	0.561133	2.13246	0.00215	0.026869	yes
C20orf111	19.511	13.3681	-0.545501	-2.17904	0.00215	0.026869	yes
DEPDC7	2.85762	1.56354	-0.869999	-2.24938	0.00215	0.026869	yes
RGS3	2.29411	3.79691	0.726888	2.12285	0.0022	0.0273796	yes
HSPA12A	1.73348	2.71117	0.645247	2.15031	0.0022	0.0273796	yes
CNO	8.90074	13.4229	0.592702	2.16267	0.0022	0.0273796	yes
NDE1	12.0565	17.9615	0.575102	2.15535	0.0022	0.0273796	yes
ALDH1B1	29.1725	20.588	-0.502807	-2.1776	0.0022	0.0273796	yes
C11orf68	0.382152	1.8726	2.29282	2.62023	0.00225	0.0279171	yes
SIGIRR	8.76089	13.9515	0.671267	2.16195	0.00225	0.0279171	yes
TANC2	7.69231	10.9353	0.507498	2.05308	0.00225	0.0279171	yes
TWF1	64.7467	91.0405	0.491702	2.24115	0.00225	0.0279171	yes
AP1G2,JPH4	26.4032	17.2805	-0.611572	-2.21087	0.00225	0.0279171	yes
NT5DC3	5.123	3.06907	-0.739189	-2.04368	0.00225	0.0279171	yes
DUSP22	11.293	17.6559	0.64472	2.15106	0.0023	0.0284108	yes
BCAT2	27.5061	19.1884	-0.519518	-2.13536	0.0023	0.0284108	yes
LDLRAP1	12.1792	8.42236	-0.532117	-2.11037	0.0023	0.0284108	yes
FAM117B	1.78873	1.08207	-0.725136	-2.18095	0.0023	0.0284108	yes
DMKN	11.1684	5.95513	-0.907216	-2.09756	0.0023	0.0284108	yes
C10orf35	3.30713	1.74771	-0.920115	-2.23396	0.0023	0.0284108	yes
NNMT	3.55137	1.86482	-0.929339	-2.22461	0.0023	0.0284108	yes
CEBPB	78.0422	115.537	0.566024	2.19229	0.00235	0.0289641	yes
C20orf24,TGIF2,TGIF2-C20ORF24	134.44	193.812	0.527694	2.18543	0.00235	0.0289641	yes
GCAT	13.0042	8.76391	-0.569326	-2.15412	0.00235	0.0289641	yes
ALKBH7	15.0879	10.1253	-0.575424	-2.13697	0.00235	0.0289641	yes
FPR1	4.09445	2.34709	-0.802797	-2.19964	0.00235	0.0289641	yes
CEP19	1.93263	3.22196	0.737372	2.18698	0.0024	0.0294592	yes
PPP6R1,TMEM86B	29.8474	42.5857	0.512765	2.17043	0.0024	0.0294592	yes
ATP6V0B	79.4138	111.615	0.491076	2.09417	0.0024	0.0294592	yes
TPM3	183.511	257.292	0.487536	2.1727	0.0024	0.0294592	yes
INPPL1	23.4055	32.7373	0.48409	2.11819	0.0024	0.0294592	yes
FXYD5	82.9639	116.029	0.483932	2.13922	0.0024	0.0294592	yes
SLC12A8,ZNF148	16.7082	11.2097	-0.575819	-2.20555	0.0024	0.0294592	yes
NNMT	246.885	163.433	-0.595142	-2.14093	0.0024	0.0294592	yes
CMTM4	8.79267	12.6379	0.523384	2.19925	0.00245	0.0299879	yes
MTRF1L	12.6842	18.2082	0.521546	2.18012	0.00245	0.0299879	yes
CBFB	37.6202	52.9166	0.492213	2.14546	0.00245	0.0299879	yes
ABLIM1	21.1445	15.1478	-0.481173	-2.0992	0.00245	0.0299879	yes
CDKN3	37.6209	54.1526	0.525498	2.1285	0.0025	0.0304754	yes
LOC553103	6.636	1.69352	-1.97029	-2.12309	0.0025	0.0304754	yes
FAM195B	12.5092	18.4798	0.562958	2.12014	0.00255	0.0309975	yes
MOCS2	31.3086	44.9834	0.522832	2.15244	0.00255	0.0309975	yes
ALDOA	655.249	933.224	0.510179	2.2038	0.00255	0.0309975	yes
ZMYND8	14.0543	19.9599	0.506097	2.18223	0.00255	0.0309975	yes
FOXO1	43.4985	30.7933	-0.49835	-2.08719	0.00255	0.0309975	yes
DCAF4	10.3589	6.90899	-0.584324	-2.08687	0.00255	0.0309975	yes
PCGF1	10.8808	16.7454	0.621972	2.12123	0.0026	0.0315119	yes
RGS10	24.7636	37.3293	0.592084	2.11779	0.0026	0.0315119	yes
B3GNT2,COMMD1	29.2514	46.8683	0.680107	2.07523	0.00265	0.0319687	yes
GNPNAT1	40.8322	57.5771	0.495787	2.20924	0.00265	0.0319687	yes
AMOTL1	7.971	11.1849	0.48872	2.12045	0.00265	0.0319687	yes
IRX1	11.8534	7.9093	-0.583677	-2.107	0.00265	0.0319687	yes
PCDHA1,PCDHA10,PCDHA11,PCDHA12,PCDHA13,PCDHA2,PCDHA3,PCDHA4,PCDHA5,PCDHA6,PCDHA7,PCDHA8,PCDHA9,PCDHAC1,PCDHAC2	6.03557	3.74944	-0.686814	-2.12893	0.00265	0.0319687	yes
SHMT1	18.7245	10.469	-0.838809	-2.32796	0.00265	0.0319687	yes
CXCL16	4.38144	1.76941	-1.30814	-2.40639	0.00265	0.0319687	yes
C11orf68	15.979	22.9282	0.520942	2.11934	0.0027	0.0324763	yes
SLC16A3	240.095	331.626	0.465952	2.10249	0.0027	0.0324763	yes
ROGDI	8.01581	5.12697	-0.644741	-2.12948	0.0027	0.0324763	yes
ALOX5AP	4.67453	2.48416	-0.912066	-2.20059	0.0027	0.0324763	yes
TFPI	62.9511	93.1662	0.565575	2.21131	0.00275	0.0329708	yes
MTFP1,SEC14L2	61.3107	89.8925	0.552063	2.05009	0.00275	0.0329708	yes
PXK	7.42772	10.8185	0.542506	2.13155	0.00275	0.0329708	yes
GAS2L1	12.7069	18.3397	0.529359	2.07118	0.00275	0.0329708	yes
HIP1	9.04878	6.49406	-0.478604	-2.05003	0.00275	0.0329708	yes
AASS	4.981	3.33349	-0.579403	-2.05221	0.00275	0.0329708	yes
SLC25A29	6.10105	3.81147	-0.67871	-2.16752	0.00275	0.0329708	yes
ST3GAL5	1.13023	2.05523	0.862679	2.20172	0.0028	0.0334313	yes
ZNF385A	3.50534	5.58441	0.671849	2.11267	0.0028	0.0334313	yes
FBXL14	7.7071	11.3209	0.554725	2.15591	0.0028	0.0334313	yes
ADM	21.1226	14.6218	-0.530663	-2.10328	0.0028	0.0334313	yes
ANKRD33B	1.90554	1.26382	-0.59241	-2.11218	0.0028	0.0334313	yes
HEXIM2	3.35873	1.94625	-0.787221	-2.16456	0.0028	0.0334313	yes
S100A9	4.356	2.20648	-0.981259	-2.17673	0.0028	0.0334313	yes
LOC100505633	2.45862	1.16988	-1.07149	-2.2077	0.0028	0.0334313	yes
C11orf41	0.40842	2.42854	2.57197	0.677666	0.00285	0.0339503	yes
N4BP2	2.76951	4.59851	0.731537	1.68128	0.00285	0.0339503	yes
COL4A6	14.786	21.5664	0.544555	2.08032	0.00285	0.0339503	yes
C18orf54	2.1846	3.73793	0.774867	2.13527	0.0029	0.0344773	yes
S100A3	13.6807	8.3515	-0.712031	-2.12947	0.0029	0.0344773	yes
ANP32E	58.4709	81.6178	0.481166	2.13569	0.00295	0.0349597	yes
SNHG7	58.9543	40.9958	-0.524119	-2.09624	0.00295	0.0349597	yes
LOC375295	4.19131	7.04803	0.749818	2.12191	0.003	0.0354283	yes
USP13	7.63834	11.2101	0.553466	2.0663	0.003	0.0354283	yes
MTMR9	5.02996	7.26339	0.530096	2.16482	0.003	0.0354283	yes
BIN1	50.834	73.1437	0.524939	2.13114	0.003	0.0354283	yes
HOXC4,HOXC5,HOXC6	13.5951	8.98543	-0.597422	-2.07533	0.003	0.0354283	yes
ZNF766	3.28904	2.10826	-0.641615	-2.09121	0.00305	0.0358882	yes
TMEM87B	10.8978	15.401	0.498987	2.12011	0.0031	0.036394	yes
OTUD5	13.867	19.6734	0.504584	2.09136	0.0032	0.037427	yes
HIP1R	9.4834	13.3433	0.492643	2.09375	0.0032	0.037427	yes
CARS	17.9222	25.0977	0.485806	2.0808	0.0032	0.037427	yes
ODC1	131.864	182.22	0.466626	2.09244	0.0032	0.037427	yes
SVIP	9.80611	5.17673	-0.921641	-2.13891	0.0032	0.037427	yes
PGK1	312.156	440.204	0.495906	2.16621	0.00325	0.0378527	yes
BLMH	16.6732	23.4796	0.493881	2.03624	0.00325	0.0378527	yes
AIDA	97.2562	133.837	0.460613	2.08413	0.00325	0.0378527	yes
SNHG9	16.7166	31.5582	0.916732	2.16123	0.0033	0.0383433	yes
PNPO	17.088	12.1323	-0.494133	-2.05285	0.0033	0.0383433	yes
PINX1,SOX7	9.26242	14.948	0.690492	2.04955	0.00335	0.0388143	yes
FH	138.98	192.082	0.466841	2.09778	0.00335	0.0388143	yes
CTF1	2.0621	1.09089	-0.918603	-2.12717	0.00335	0.0388143	yes
CDKN2D	3.67365	5.9282	0.690381	2.08242	0.0034	0.0392942	yes
JMJD6	10.3111	16.3967	0.669201	2.12098	0.0034	0.0392942	yes
STAM	15.1314	22.3068	0.559933	2.01585	0.0034	0.0392942	yes
ATP6V1D	42.299	58.709	0.47296	2.04996	0.0034	0.0392942	yes
CAP1	154.556	213.956	0.469184	2.09893	0.0034	0.0392942	yes
FSTL1	69.9407	50.7188	-0.463612	-2.08321	0.0034	0.0392942	yes
CORO2A	2.32027	1.554	-0.578306	-2.03485	0.0034	0.0392942	yes
ZNF57	1.83746	1.06609	-0.785391	-2.09478	0.0034	0.0392942	yes
ROR1	5.93966	1.72659	-1.78245	-2.54362	0.0034	0.0392942	yes
RPIA	8.00019	11.8587	0.567839	2.02039	0.00345	0.0397718	yes
SYNJ1	2.28744	3.36648	0.557512	2.0724	0.00345	0.0397718	yes
PLEKHB2	44.7191	62.2353	0.476844	2.09023	0.00345	0.0397718	yes
WDR66	11.5645	6.33611	-0.868033	-2.05974	0.00345	0.0397718	yes
FAM54B	15.8915	24.2782	0.611407	2.07938	0.00355	0.0407077	yes
TTC9C	8.53857	13.0725	0.614465	2.04537	0.0036	0.0411297	yes
C15orf57	4.99059	7.50573	0.588782	2.03562	0.0036	0.0411297	yes
PPP5C	55.315	79.4136	0.521715	2.02914	0.0036	0.0411297	yes
TUBGCP2	30.3468	43.428	0.517079	2.00977	0.0036	0.0411297	yes
ZNF281	11.5807	16.3769	0.499947	2.07945	0.0036	0.0411297	yes
MND1	12.9449	19.3167	0.577471	2.01311	0.00365	0.0416337	yes
EPB41L1	4.3611	2.87345	-0.601907	-2.03583	0.00365	0.0416337	yes
PVRL4	2.49527	1.49237	-0.741593	-2.07162	0.00365	0.0416337	yes
IFI27	1.92675	0.442134	-2.12362	-2.32761	0.00365	0.0416337	yes
SLC25A18	2.67978	4.21698	0.654094	2.09656	0.0037	0.0420931	yes
TRIM23	4.44694	6.65508	0.581642	2.10634	0.0037	0.0420931	yes
NUP188	25.6041	36.1521	0.497706	2.0487	0.0037	0.0420931	yes
IRAK1	56.165	77.2773	0.460373	2.08872	0.0037	0.0420931	yes
ARHGAP35	16.4627	11.6144	-0.503285	-2.05271	0.0037	0.0420931	yes
PCK2	9.1737	13.1891	0.523769	2.05553	0.00375	0.0425749	yes
RAB7A	102.932	144.258	0.486966	2.01548	0.00375	0.0425749	yes
TUB	2.4733	1.5901	-0.637323	-1.98372	0.00375	0.0425749	yes
SDR42E1	2.25602	1.33101	-0.761255	-2.07654	0.00375	0.0425749	yes
GORAB	4.46845	6.76634	0.598602	2.12562	0.0038	0.0430484	yes
PTTG1IP	109.001	79.2917	-0.459105	-2.03914	0.0038	0.0430484	yes
BTN3A3	5.00541	3.13293	-0.675976	-1.96158	0.0038	0.0430484	yes
CREM	9.59046	14.492	0.595585	2.04551	0.00385	0.0435578	yes
HMGXB3	17.3305	24.7533	0.51431	2.06508	0.00385	0.0435578	yes
IMPA1	20.0353	27.9864	0.482178	2.04385	0.00385	0.0435578	yes
GSTP1	947.663	678.266	-0.482522	-2.00952	0.0039	0.0440531	yes
WDFY2	13.0233	21.2386	0.705591	2.02139	0.00395	0.044476	yes
LRRC8B,LRRC8C	9.42078	13.7082	0.541123	1.99744	0.00395	0.044476	yes
NRD1	59.8288	86.3048	0.528602	2.00533	0.00395	0.044476	yes
VASP	41.36	56.8624	0.459239	1.99735	0.00395	0.044476	yes
KIAA1161	3.52733	2.44814	-0.526889	-1.97981	0.00395	0.044476	yes
FAM65B	2.62603	1.57014	-0.741984	-2.09613	0.00395	0.044476	yes
HOXC8	4.40198	6.632	0.59129	2.07371	0.004	0.0449416	yes
RAET1E	13.8822	20.2103	0.541854	2.03639	0.004	0.0449416	yes
CDH2	19.2753	13.6094	-0.502146	-2.08263	0.004	0.0449416	yes
ADAMTS1	2.20997	1.41485	-0.643371	-2.04465	0.004	0.0449416	yes
CCNJL	1.11383	1.95635	0.812631	2.0768	0.00405	0.0454182	yes
S100A11	944.851	1302.42	0.463031	2.062	0.00405	0.0454182	yes
LMO4	9.85251	15.0417	0.610401	2.0848	0.0041	0.0458403	yes
SMPD1	10.7468	15.7658	0.552889	2.00315	0.0041	0.0458403	yes
RNF181	40.0607	56.6731	0.500476	2.03427	0.0041	0.0458403	yes
TUBA4A	97.0267	69.4183	-0.483067	-1.99268	0.00415	0.0463129	yes
ETHE1	57.585	39.1855	-0.555375	-2.00926	0.00415	0.0463129	yes
ERGIC2	11.523	16.4511	0.513664	2.06156	0.0042	0.046757	yes
XBP1	32.8517	45.2847	0.463056	1.98712	0.0042	0.046757	yes
GRPEL1	43.9739	60.6046	0.462779	1.99453	0.0042	0.046757	yes
TALDO1	118.1	161.337	0.45007	2.00691	0.0042	0.046757	yes
DDIT4	195.901	143.252	-0.451575	-2.03226	0.0042	0.046757	yes
RNF217	5.06759	3.23182	-0.648954	-1.99636	0.0042	0.046757	yes
GLCE	11.499	18.4225	0.679966	1.96872	0.00425	0.0472259	yes
HIST2H2BE	3.20365	5.01076	0.645314	2.02174	0.00425	0.0472259	yes
STXBP1	14.5524	20.5684	0.499168	2.0631	0.00425	0.0472259	yes
PAPSS1	35.4868	49.2307	0.472275	2.06122	0.00425	0.0472259	yes
SEL1L	19.0048	26.1304	0.459362	2.04168	0.00425	0.0472259	yes
SFXN1	48.8615	67.0162	0.455812	2.01732	0.00425	0.0472259	yes
SH3BP4	48.1534	35.3165	-0.447293	-1.97412	0.00425	0.0472259	yes
BEND6	1.37674	2.25202	0.709968	2.02131	0.0043	0.0476999	yes
FAM43A	1.70204	2.66715	0.648033	2.04076	0.00435	0.0481859	yes
LRP6	5.49272	7.7824	0.502694	1.99705	0.00435	0.0481859	yes
PSMD12	44.7264	63.2447	0.499818	2.00602	0.00435	0.0481859	yes
PIAS2	7.90195	11.8492	0.584514	2.00134	0.0044	0.0486291	yes
ECM1,TARS2	21.6546	29.9532	0.468036	1.98065	0.0044	0.0486291	yes
PLEKHG2	5.2734	10.296	0.965275	1.42918	0.00445	0.0490773	yes
CYTH2	21.4849	31.8186	0.56655	1.98541	0.00445	0.0490773	yes
LIMS1	17.6415	24.487	0.473047	2.01327	0.00445	0.0490773	yes
RCOR1	16.08	22.0347	0.454512	1.9882	0.00445	0.0490773	yes
E2F1,PXMP4	10.5295	14.9517	0.505875	2.0248	0.0045	0.0495585	yes
TFE3	14.8296	20.6396	0.476931	2.03016	0.0045	0.0495585	yes
LOC100127888	0.60393	2.10148	1.79895	2.05948	0.00455	0.0500102	yes
LOC646329	0.968803	2.50268	1.3692	1.94443	0.00455	0.0500102	yes
S100P	5.01107	8.59999	0.779215	1.99435	0.00455	0.0500102	yes
CHD7	1.41217	2.04145	0.531679	2.02694	0.00455	0.0500102	yes
SLC44A1	30.3271	42.283	0.479469	2.02148	0.00455	0.0500102	yes
CHP	53.0325	38.5854	-0.458821	-2.03939	0.00455	0.0500102	yes
XPC	18.3026	13.2325	-0.467963	-2.00393	0.00455	0.0500102	yes
CDK17	8.1513	11.58	0.506536	2.02645	0.0046	0.0504601	yes
ITPR3	31.4993	43.0617	0.451085	2.02549	0.00465	0.0509512	yes
MSLNL	2.26374	0.795955	-1.50795	-2.17765	0.00465	0.0509512	yes
CCNYL1	7.94046	11.2507	0.502726	2.00066	0.0047	0.0514122	yes
SLC3A2	168.603	123.102	-0.453771	-2.02042	0.0047	0.0514122	yes
CYB5A	57.1081	41.0348	-0.476847	-1.97515	0.0047	0.0514122	yes
ENTPD7	1.70632	4.15975	1.2856	2.10018	0.00475	0.0518064	yes
S100A13	171.086	267.368	0.644102	2.03154	0.00475	0.0518064	yes
TXNDC9	28.4484	39.6416	0.478665	2.0121	0.00475	0.0518064	yes
MBNL2	14.8107	10.1819	-0.540626	-1.99515	0.00475	0.0518064	yes
RTKN	15.4502	10.2627	-0.590218	-2.02992	0.00475	0.0518064	yes
RAMP1	3.56771	1.95817	-0.865493	-2.0813	0.00475	0.0518064	yes
SPOPL	6.26355	8.84428	0.497764	2.04627	0.00485	0.0527273	yes
MSI2	19.0743	13.7396	-0.473288	-1.9639	0.0049	0.0531818	yes
DAZAP2	91.016	65.5269	-0.474032	-1.94863	0.0049	0.0531818	yes
EVI2B	6.14628	16.3988	1.4158	2.15996	0.005	0.0541464	yes
CLIP4	21.4403	29.8441	0.477125	1.99334	0.005	0.0541464	yes
LSS	31.6929	23.0127	-0.461732	-1.98583	0.005	0.0541464	yes
RRAGA	58.0757	79.2098	0.447743	1.97185	0.00505	0.0545968	yes
SH3RF2	2.1329	1.04406	-1.03061	-1.89072	0.00505	0.0545968	yes
PIK3R1	30.5683	22.4834	-0.443178	-1.96938	0.0051	0.0550609	yes
NIPSNAP1	30.8557	22.4175	-0.460909	-1.96371	0.0051	0.0550609	yes
MPHOSPH6	42.2573	58.8599	0.478083	1.99045	0.00515	0.0555391	yes
STRN	8.31751	12.5476	0.593184	1.99558	0.0052	0.0559776	yes
ZNF295	3.72326	2.59331	-0.521772	-1.94162	0.0052	0.0559776	yes
DCP1A	6.50824	9.32656	0.519077	1.99382	0.00525	0.0564379	yes
CYBRD1	14.9735	10.7855	-0.473314	-1.97545	0.00525	0.0564379	yes
PRRG4	3.40074	2.30637	-0.560228	-1.98546	0.00525	0.0564379	yes
AHNAK2	27.6101	17.0401	-0.696264	-1.95946	0.00525	0.0564379	yes
SYT5	0.239071	1.93297	3.01531	2.26246	0.0053	0.0569125	yes
NOM1	9.38129	13.4236	0.51691	2.00488	0.0053	0.0569125	yes
PRR12	5.75513	8.46024	0.555851	1.9337	0.00535	0.0573941	yes
C6orf62	60.2857	87.4773	0.537093	1.99138	0.0054	0.0578667	yes
CNFN	4.24165	1.9167	-1.146	-2.13329	0.0054	0.0578667	yes
ITGA3	138.008	186.122	0.431496	1.90127	0.00545	0.0583223	yes
ARHGEF9	8.92239	5.27173	-0.759153	-1.95849	0.00545	0.0583223	yes
CBR3	6.98317	10.585	0.60006	1.95372	0.0055	0.0586559	yes
UQCRH	387.122	525.138	0.439909	1.95592	0.0055	0.0586559	yes
UBE2S	152.832	206.202	0.432111	1.98458	0.0055	0.0586559	yes
PGRMC2	35.1588	25.0858	-0.487014	-2.01591	0.0055	0.0586559	yes
PKM2	681.95	942.542	0.466892	1.95238	0.00555	0.0591001	yes
YTHDC2	12.6467	8.6058	-0.555384	-1.67625	0.00555	0.0591001	yes
ATXN1	1.17284	2.10082	0.840938	1.93471	0.0056	0.0594862	yes
PYGO2,SHC1	295.18	423.969	0.522362	1.95423	0.0056	0.0594862	yes
CPS1	8.43801	6.06555	-0.476264	-1.95147	0.0056	0.0594862	yes
GLS2	1.80221	0.38571	-2.22418	-2.68475	0.0056	0.0594862	yes
HSPA5	160.446	217.516	0.439035	1.9487	0.00565	0.0598622	yes
LMLN	1.27801	1.9009	0.572784	1.95942	0.0057	0.0602853	yes
C11orf84	9.00055	12.7896	0.506887	1.98137	0.0057	0.0602853	yes
COQ10B	17.547	24.6978	0.493158	1.99452	0.0057	0.0602853	yes
SH3BP2	4.21374	5.85727	0.475125	1.96528	0.0057	0.0602853	yes
ALDH18A1	36.176	26.67	-0.439816	-1.93843	0.0058	0.061152	yes
ACER3	7.42972	10.3887	0.48364	1.95397	0.00585	0.0616041	yes
PRDM4	12.2499	16.6095	0.439241	1.87489	0.00585	0.0616041	yes
CRYAB	2.67858	1.26829	-1.07859	-2.01401	0.00585	0.0616041	yes
MARCKS	24.8095	18.1922	-0.447569	-1.90324	0.0059	0.0620384	yes
KCTD12	4.87815	6.83141	0.48585	1.90624	0.006	0.0629031	yes
ZNF619,ZNF620	2.16453	1.38644	-0.642667	-1.91608	0.006	0.0629031	yes
SPRYD3	10.2135	18.8833	0.886626	1.94057	0.00605	0.0632485	yes
DAB2	1.76256	2.79442	0.664875	1.93945	0.00605	0.0632485	yes
SLC19A2	14.285	20.2296	0.501965	1.96048	0.00605	0.0632485	yes
RAB11FIP2	6.27337	8.78877	0.486419	1.99885	0.00605	0.0632485	yes
UBE2E3	60.0865	82.0498	0.449458	1.94119	0.00605	0.0632485	yes
CDC42BPB	29.6987	40.3989	0.443914	1.9555	0.0061	0.0636858	yes
MAPRE3	7.73161	10.9373	0.500417	1.89121	0.00615	0.0640789	yes
SP4	1.98243	1.30489	-0.603337	-1.95389	0.00615	0.0640789	yes
SIPA1L2	4.76158	2.90951	-0.710663	-1.91606	0.00615	0.0640789	yes
CUX1	15.3799	10.5761	-0.540236	-1.90368	0.0062	0.0645136	yes
XRCC5	3.32422	1.81872	-0.870093	-1.96648	0.0062	0.0645136	yes
MCF2L2	0.793422	3.75094	2.24109	1.98948	0.00625	0.0649471	yes
FLOT1	63.7049	46.6826	-0.44852	-1.92124	0.00625	0.0649471	yes
FIGN	2.26466	1.54091	-0.555514	-1.91812	0.00625	0.0649471	yes
PDK2	4.96637	3.007	-0.723869	-1.97059	0.00625	0.0649471	yes
CXCR7	7.0628	0.0401843	-7.45746	-6.18154	0.00625	0.0649471	yes
KLHL15	2.78721	4.02203	0.529101	1.92096	0.0063	0.0653534	yes
CD44	89.9222	124.852	0.473466	1.88313	0.00635	0.0658107	yes
ACSL1	91.8421	68.1818	-0.429768	-1.91667	0.00635	0.0658107	yes
TXNDC16	4.67578	3.18436	-0.554204	-1.97172	0.00635	0.0658107	yes
KLF9	11.3716	15.9204	0.485442	1.94184	0.0064	0.0662496	yes
RHOC	143.943	194.716	0.435868	1.9466	0.0064	0.0662496	yes
N6AMT1	4.95122	7.67932	0.633196	1.90166	0.00645	0.0666608	yes
TOP1	55.8202	75.4112	0.433993	1.94368	0.00645	0.0666608	yes
TMEM22	9.01027	17.7474	0.977967	2.03527	0.0065	0.0671242	yes
SPTY2D1	5.49168	7.60951	0.470555	1.91836	0.0065	0.0671242	yes
UBE2Q2	14.8613	20.4484	0.460431	1.92769	0.00655	0.067542	yes
GFPT1	13.2182	17.9233	0.439312	1.93595	0.00655	0.067542	yes
CD109	48.7603	35.7175	-0.449076	-1.94559	0.00655	0.067542	yes
YRDC	16.1298	26.2212	0.701005	1.95949	0.0066	0.0679048	yes
C13orf15	15.5714	9.22396	-0.75544	-1.94051	0.0066	0.0679048	yes
SELS	34.0432	46.7277	0.456913	1.89328	0.00665	0.068347	yes
LOC554202	0.363503	2.14896	2.5636	2.26975	0.0067	0.0687973	yes
U2AF1L4	6.47523	3.96416	-0.707916	-1.90924	0.0067	0.0687973	yes
PANX2	2.58945	3.82479	0.562732	1.99727	0.00675	0.0691922	yes
SHCBP1	18.5571	25.3969	0.452681	1.93082	0.00675	0.0691922	yes
TCTN1	19.3498	13.7654	-0.491273	-1.91204	0.00675	0.0691922	yes
TSPAN13	31.028	42.684	0.460124	1.90942	0.0068	0.0696039	yes
AKIRIN1	32.4163	44.0782	0.443343	1.92708	0.0068	0.0696039	yes
BCL7A	4.75667	3.30614	-0.524805	-1.92915	0.00685	0.0699962	yes
GTF3C6	40.8029	56.2938	0.464304	1.95087	0.0069	0.0704055	yes
DNTTIP2,GCLM	46.7889	63.1516	0.432654	1.92155	0.0069	0.0704055	yes
SCNN1B	8.48365	6.04217	-0.489619	-1.89326	0.00705	0.0716638	yes
STK3	11.8859	8.31064	-0.516216	-1.918	0.00705	0.0716638	yes
EIF5A2	2.85753	4.13879	0.534443	1.94967	0.0071	0.0720217	yes
UROS	30.0379	42.4236	0.498081	1.90448	0.00715	0.0723969	yes
FHL1	12.5471	19.955	0.6694	1.95227	0.0072	0.072818	yes
PPPDE2	34.9614	51.4386	0.557089	1.89314	0.00725	0.0732666	yes
CFDP1	28.0417	40.3013	0.523252	1.8989	0.0073	0.0736476	yes
NDUFAF2	36.6471	50.6156	0.465883	1.87638	0.0073	0.0736476	yes
TGFBR2	2.40025	3.52444	0.554214	1.81811	0.00735	0.0740562	yes
HDAC8	9.18586	13.3896	0.543629	1.91283	0.00735	0.0740562	yes
C1orf97	10.8127	16.5411	0.613325	1.91021	0.0074	0.0745021	yes
WDR13	30.6494	41.761	0.446297	1.91257	0.0074	0.0745021	yes
TLN2	3.38727	2.37189	-0.514082	-1.90675	0.0074	0.0745021	yes
NDUFAF4	21.2126	34.7543	0.712269	1.89353	0.00745	0.0748314	yes
WDR60	4.03461	5.7263	0.505172	1.89017	0.00745	0.0748314	yes
CBR1	62.3783	83.6018	0.42249	1.84806	0.00745	0.0748314	yes
KIAA1522	11.9565	5.90284	-1.01831	-2.02302	0.00745	0.0748314	yes
SCARB1	1.97258	0.561956	-1.81155	-2.02393	0.00745	0.0748314	yes
PLEKHM3	1.6832	2.37245	0.495165	1.85507	0.0075	0.0751882	yes
MEGF9	5.35537	7.45559	0.477335	1.87687	0.0075	0.0751882	yes
CTDSPL	20.0128	14.5589	-0.459022	-1.87816	0.0075	0.0751882	yes
EPB49	7.6143	5.31198	-0.519461	-1.86219	0.0075	0.0751882	yes
POLR2A	30.5595	40.6282	0.410859	1.85355	0.00755	0.0756311	yes
FKBP5	10.0494	6.11326	-0.71709	-1.86624	0.00755	0.0756311	yes
OBFC1	16.9097	24.5392	0.537238	1.91637	0.0076	0.0760537	yes
C1RL	9.51304	6.1559	-0.627937	-1.91145	0.0076	0.0760537	yes
ST5	7.65184	10.8239	0.500335	1.92235	0.0077	0.0769259	yes
ADRA1B	1.84948	0.981175	-0.914536	-1.92665	0.0077	0.0769259	yes
MSX1	3.30765	5.08902	0.621578	1.83783	0.0078	0.0777953	yes
FAAH,NSUN4	14.6295	10.4609	-0.483867	-1.81647	0.0078	0.0777953	yes
ZADH2	14.34	19.456	0.440173	1.90883	0.00785	0.0782138	yes
TTLL1	2.48157	1.52054	-0.706671	-1.87069	0.00785	0.0782138	yes
CDH1	10.4964	0.0147798	-9.47205	-7.66727	0.00785	0.0782138	yes
H3F3B	183.083	243.798	0.413191	1.85446	0.0079	0.0786416	yes
L3MBTL3	4.16901	6.05558	0.538558	1.87008	0.008	0.0794847	yes
CHORDC1	13.8546	19.0677	0.460771	1.91896	0.0081	0.0802735	yes
LDLR	43.2069	57.5315	0.413089	1.85304	0.00815	0.0806766	yes
PERP	84.4888	62.8993	-0.425716	-1.9141	0.00815	0.0806766	yes
TNC	2.3481	1.6266	-0.529631	-1.92905	0.0082	0.081048	yes
GREB1L	5.44098	3.85571	-0.49687	-1.87405	0.00825	0.0814491	yes
CES4A	3.94167	2.37524	-0.730733	-1.85602	0.00825	0.0814491	yes
NAA20	73.0173	105.106	0.52553	1.85453	0.0083	0.0818909	yes
KIF18B	8.14937	11.5327	0.500969	1.88811	0.0083	0.0818909	yes
NECAP1	16.4895	22.5155	0.449371	1.87248	0.00845	0.0831707	yes
PDGFA	7.33907	5.01631	-0.548972	-1.86666	0.00845	0.0831707	yes
FCRLB	2.47018	4.13851	0.744494	1.86945	0.00855	0.0839957	yes
GTSE1	13.6718	21.1425	0.62894	1.80913	0.00855	0.0839957	yes
SESN2	5.27734	7.38628	0.485036	1.88506	0.0086	0.0844018	yes
MCCC2	33.6875	25.0711	-0.426191	-1.84931	0.0086	0.0844018	yes
ZCCHC11	16.4735	11.1661	-0.561022	-1.88386	0.00865	0.084775	yes
CPVL	19.879	27.3617	0.460916	1.81578	0.0087	0.0851793	yes
HSPA4L	11.3982	8.52479	-0.419064	-1.80175	0.0087	0.0851793	yes
TPM2	244.43	326.36	0.417043	1.82716	0.00875	0.0855935	yes
CA9	1.39309	2.29363	0.719342	1.88921	0.0088	0.0859747	yes
BRPF3	7.43406	9.99071	0.426437	1.7986	0.0088	0.0859747	yes
FSTL3	68.6314	51.317	-0.419432	-1.86113	0.0088	0.0859747	yes
MME	17.5301	13.0362	-0.427316	-1.87385	0.0088	0.0859747	yes
DDAH1	12.8665	9.16177	-0.489923	-1.84194	0.0088	0.0859747	yes
RGS14	5.03055	7.60025	0.595331	1.85662	0.00885	0.0863332	yes
LNPEP	9.13135	12.396	0.44098	1.83725	0.00885	0.0863332	yes
NBPF10,NOTCH2NL	20.1903	27.8688	0.46499	1.86371	0.00895	0.0871233	yes
SOX12	9.72242	6.32763	-0.619648	-1.88559	0.00895	0.0871233	yes
NEXN	8.05066	2.07519	-1.95587	-2.15733	0.009	0.0875115	yes
ITGA3	2.00008	5.07913	1.34453	2.06837	0.00905	0.0878661	yes
SIPA1L1	9.91921	17.5834	0.825918	1.11932	0.00915	0.0886602	yes
TANK	31.766	47.7251	0.587263	1.89192	0.00915	0.0886602	yes
ABLIM3,AFAP1L1	100.189	141.911	0.502268	1.45552	0.00915	0.0886602	yes
BUB1	21.5625	28.7386	0.414465	1.80154	0.00915	0.0886602	yes
THRB	2.36104	3.32825	0.495338	1.88009	0.0092	0.0890782	yes
CAMTA2	32.9705	44.6279	0.436773	1.82173	0.00925	0.0894067	yes
BCOR	7.28298	5.37522	-0.438206	-1.81374	0.00925	0.0894067	yes
C4orf14	21.1709	15.6079	-0.439806	-1.83256	0.00925	0.0894067	yes
PNPLA2	45.6168	33.814	-0.431946	-1.86251	0.0093	0.0897452	yes
SLC25A38	22.739	16.5849	-0.455299	-1.83781	0.0093	0.0897452	yes
NR4A3	4.19355	0.0373869	-6.80949	-1.8888	0.0093	0.0897452	yes
CYB561	21.6239	16.0116	-0.433505	-1.81051	0.0094	0.0905084	yes
LMF1	2.32789	1.22728	-0.923557	-1.87081	0.0094	0.0905084	yes
ADCY7	6.18859	9.78986	0.661678	1.8253	0.00945	0.0909561	yes
XKR8	6.20453	8.81226	0.50619	1.81465	0.0095	0.0913696	yes
ATE1	10.2086	14.2917	0.485391	1.8536	0.0095	0.0913696	yes
SOCS4	9.19437	12.5108	0.444352	1.88262	0.0095	0.0913696	yes
ARAP1	13.9411	18.9226	0.440769	1.83641	0.00955	0.0917486	yes
CYR61	279.054	209.547	-0.413269	-1.81727	0.00955	0.0917486	yes
PRPS2	38.4965	28.814	-0.417954	-1.81302	0.00955	0.0917486	yes
TMEM43	68.4185	51.3844	-0.413056	-1.82696	0.0096	0.092138	yes
ZBTB12	2.51395	1.59594	-0.655544	-1.84921	0.0096	0.092138	yes
IDI1	79.0579	105.598	0.417608	1.82738	0.00965	0.0925495	yes
CKS2	191.289	254.894	0.41414	1.8056	0.00965	0.0925495	yes
CCDC117	6.56094	9.17178	0.483298	1.86039	0.0097	0.0929032	yes
SNRPB2	48.5428	66.7467	0.45944	1.83797	0.0097	0.0929032	yes
ARL4D	8.5602	12.2395	0.515826	1.79887	0.00975	0.0933132	yes
LEPRE1	17.2733	23.2848	0.430844	1.82548	0.0098	0.0936881	yes
MGA	1.95377	1.38835	-0.492885	-1.7994	0.0098	0.0936881	yes
KLC2	19.2209	25.8136	0.425453	1.8242	0.0099	0.0944008	yes
FBXO5	12.0341	16.5765	0.462009	1.81144	0.00995	0.094808	yes
UBL3	18.0376	13.3396	-0.435291	-1.82505	0.00995	0.094808	yes
SYTL3	1.35236	2.17345	0.68451	1.76837	0.01	0.0951796	yes
ACYP1	10.5901	16.4241	0.633105	1.85926	0.01005	0.0955504	yes
FAM168A	5.77216	7.83301	0.440455	1.81133	0.01005	0.0955504	yes
CD70	17.307	11.669	-0.568684	-1.8415	0.01005	0.0955504	yes
COBLL1	3.28365	2.27747	-0.527865	-1.80458	0.0101	0.0959672	yes
METRNL	4.71572	7.28122	0.626701	1.79315	0.01015	0.0963366	yes
EXOC8	9.2591	12.6328	0.448227	1.84882	0.01015	0.0963366	yes
TEAD1	37.1985	26.7264	-0.476975	-0.879435	0.0102	0.0967286	yes
CDC25C	7.96669	11.0446	0.471282	1.80523	0.01025	0.0971318	yes
SMAGP	10.0644	27.1904	1.43383	1.95283	0.0103	0.0974397	yes
TRIM38	7.53415	10.8451	0.525525	1.76453	0.01035	0.0977584	yes
CNTNAP1	4.66855	6.52836	0.483746	1.43861	0.01035	0.0977584	yes
SEC24D	17.8196	23.7777	0.416146	1.82355	0.01035	0.0977584	yes
IPO7	104.965	139.966	0.415168	1.78474	0.01035	0.0977584	yes
C3orf54	2.42213	1.41831	-0.772106	-1.80956	0.01035	0.0977584	yes
FAM35B	2.49833	0.424545	-2.55697	-2.76549	0.01035	0.0977584	yes
HSPB8	8.06487	5.69828	-0.501124	-1.783	0.0104	0.0981235	yes
LOC643650	2.21653	0.328285	-2.75528	-1.83975	0.01045	0.0985237	yes
SGPP1	18.5209	25.1659	0.442316	1.82038	0.0105	0.0988515	yes
KDM5C	22.9849	30.6493	0.415168	1.73169	0.0105	0.0988515	yes
PABPC1	1222.75	906.117	-0.432355	-1.77317	0.0105	0.0988515	yes
GRAMD1C	1.03038	2.57042	1.31883	2.06311	0.01055	0.0992623	yes
IMPDH2	187.055	140.975	-0.40802	-1.82855	0.01055	0.0992623	yes
FLJ42709	3.11138	7.11275	1.19285	1.92754	0.0106	0.0996605	yes
DET1	2.46318	3.76094	0.610572	1.78956	0.0107	0.100467	no
KLHL21	12.5281	17.0002	0.440386	1.82579	0.0107	0.100467	no
RHOD	2.16394	0.825672	-1.39002	-2.01085	0.01075	0.100888	no
DSCR3	16.6215	22.1966	0.417288	1.76076	0.0108	0.10126	no
SAP18	39.705	52.3728	0.3995	1.74888	0.0108	0.10126	no
FADS2	33.7553	21.4806	-0.652076	-1.8172	0.0108	0.10126	no
MED24	44.1676	61.1768	0.469997	1.80067	0.01085	0.101594	no
BOLA3	53.3605	73.2067	0.456202	1.7957	0.01085	0.101594	no
LOC100287616	2.30446	1.19144	-0.95172	-1.79153	0.01085	0.101594	no
CXCL5	0.0413392	2.42571	5.87476	5.03775	0.0109	0.101891	no
SLC35D1	11.3381	15.2528	0.427899	1.80614	0.0109	0.101891	no
IRS1	12.9367	9.61841	-0.427597	-1.80697	0.0109	0.101891	no
SLC45A4	4.01783	2.35902	-0.768231	-1.78843	0.0109	0.101891	no
COL18A1	3.00701	1.69576	-0.826399	-1.87456	0.0109	0.101891	no
C2orf69	8.6667	11.9716	0.466057	1.84801	0.01095	0.102297	no
THOC5	10.78	14.4479	0.422503	1.75145	0.01095	0.102297	no
RAPGEFL1	4.11375	2.82794	-0.540707	-1.79221	0.01095	0.102297	no
AREG	0.00726192	2.81833	8.60027	0.527696	0.011	0.102665	no
RTEL1,TNFRSF6B	12.0094	26.9657	1.16696	1.95295	0.011	0.102665	no
IL32	4.20989	1.71623	-1.29454	-2.08835	0.011	0.102665	no
NOP10	154.373	205.093	0.409857	1.78934	0.01105	0.103046	no
MANEA	6.05262	8.385	0.470251	1.84853	0.0111	0.103388	no
C9orf89	24.2866	33.5233	0.465003	1.81177	0.0111	0.103388	no
LYPLA2	37.9906	50.9067	0.422213	1.81735	0.0112	0.104083	no
HERC6	3.19493	2.22812	-0.519956	-1.75548	0.0112	0.104083	no
LOC400027	1.95742	2.9849	0.608731	1.79422	0.01125	0.104398	no
CDH13	31.4021	41.6079	0.405996	1.72615	0.01125	0.104398	no
ARHGEF40	2.96061	4.57862	0.629017	1.88715	0.0113	0.1048	no
IFI16	39.1445	51.8354	0.405128	1.68633	0.0113	0.1048	no
NCAPG2	20.0401	26.724	0.415243	1.8057	0.01135	0.105176	no
CARHSP1	25.9424	36.8424	0.506058	1.79718	0.01145	0.105964	no
NEK8	2.22611	1.22448	-0.862355	-1.7433	0.01145	0.105964	no
AKR1C2	34.0793	153.675	2.17292	2.03318	0.0115	0.106313	no
RP2	6.26427	8.84332	0.497442	1.85298	0.0115	0.106313	no
C10orf46	11.3523	15.1611	0.41739	1.78191	0.0115	0.106313	no
SLC6A8	53.3866	39.3592	-0.439776	-1.7622	0.0115	0.106313	no
HELZ	9.13331	6.6073	-0.467078	-1.77138	0.0115	0.106313	no
UPRT	5.8162	8.16475	0.489332	1.76626	0.01155	0.106636	no
HGSNAT	17.5321	23.2856	0.409437	1.77463	0.01155	0.106636	no
HTRA1	0.972953	2.46842	1.34315	1.82584	0.0116	0.106945	no
NDUFV2	132.729	184.935	0.478537	1.78952	0.0116	0.106945	no
CYP26B1	4.89014	6.70317	0.454968	1.77257	0.0116	0.106945	no
PEAK1	2.90346	3.93103	0.437134	1.77692	0.0116	0.106945	no
SERPINB2	1.40184	2.56819	0.873432	1.7627	0.01165	0.107229	no
MAN2B1	27.7093	20.835	-0.411359	-1.81498	0.01165	0.107229	no
SNCG	18.624	13.3578	-0.479478	-1.77754	0.01165	0.107229	no
D4S234E	2.12328	0.341852	-2.63485	-2.57125	0.01165	0.107229	no
CSTB	216.532	285.631	0.399567	1.77395	0.0117	0.107575	no
[truncated: 21,307 more rows]
