# Supplementary material for: Targeting RAS-driven human cancer cells with antibodies to upregulated and essential cell-surface proteins
Source: eLife. 2018 Jan 23;7:e31098. doi: 10.7554/eLife.31098 (PMC5796798; doi:10.7554/eLife.31098)
Supplement: Supplementary file 6. [file elife-31098-supp6.xls]

## Sheet: Supplementary file 6
sgRNA ID	Gene	Oligo Sequence	Protospacer Sequence
ACAN_+_89347139.23-P1P2	ACAN	CCACCTTGTTGGAGCTCTAGGGCGGAGACCAGTTTAAGAGCTAAGCTG	GAGCTCTAGGGCGGAGACCA
ACAN_+_89347151.23-P1P2	ACAN	CCACCTTGTTGGCCCGGCACACATAGCTCTAGTTTAAGAGCTAAGCTG	GCCCGGCACACATAGCTCTA
ACAN_-_89346701.23-P1P2	ACAN	CCACCTTGTTGGctccccgccGCTCCAGAGGGTTTAAGAGCTAAGCTG	GctccccgccGCTCCAGAGG
ACAN_-_89347101.23-P1P2	ACAN	CCACCTTGTTGGCGCCCGGCGAGCCAGGAACGTTTAAGAGCTAAGCTG	GCGCCCGGCGAGCCAGGAAC
ACAN_+_89347148.23-P1P2	ACAN	CCACCTTGTTGGGGCACACATAGCTCTAGGGGTTTAAGAGCTAAGCTG	GGGCACACATAGCTCTAGGG
ACPT_+_51294074.23-ENST00000270593.1	ACPT	CCACCTTGTTGGACTCAGGAAGGCCTCGTAGGTTTAAGAGCTAAGCTG	GACTCAGGAAGGCCTCGTAG
ACPT_-_51294122.23-ENST00000270593.1	ACPT	CCACCTTGTTGGGTACCGGCGGGAGGAGGTAGTTTAAGAGCTAAGCTG	GGTACCGGCGGGAGGAGGTA
ACPT_+_51293697.23-ENST00000270593.1	ACPT	CCACCTTGTTGGcagcagGAGAGGTCCAGCAGTTTAAGAGCTAAGCTG	GcagcagGAGAGGTCCAGCA
ACPT_+_51293761.23-ENST00000270593.1	ACPT	CCACCTTGTTGGCCAGAGCCACGAACACCAGGTTTAAGAGCTAAGCTG	GCCAGAGCCACGAACACCAG
ACPT_-_51293910.23-ENST00000270593.1	ACPT	CCACCTTGTTGGCCCATGGACCCACACAAGGGTTTAAGAGCTAAGCTG	GCCCATGGACCCACACAAGG
ACVR1_+_158732232.23-P1P2	ACVR1	CCACCTTGTTGGGGTAGCCTAGCGGGAGAAGGTTTAAGAGCTAAGCTG	GGGTAGCCTAGCGGGAGAAG
ACVR1_+_158732258.23-P1P2	ACVR1	CCACCTTGTTGGCTGGAGCCGGGAGGACTGAGTTTAAGAGCTAAGCTG	GCTGGAGCCGGGAGGACTGA
ACVR1_-_158732511.23-P1P2	ACVR1	CCACCTTGTTGGtgcggtggctgcagcggagGTTTAAGAGCTAAGCTG	Gtgcggtggctgcagcggag
ACVR1_+_158732198.23-P1P2	ACVR1	CCACCTTGTTGGGTGGCAGGGTGGGCGTCTGGTTTAAGAGCTAAGCTG	GGTGGCAGGGTGGGCGTCTG
ACVR1_+_158732079.23-P1P2	ACVR1	CCACCTTGTTGGACTGCTGGTGGGATATGGGGTTTAAGAGCTAAGCTG	GACTGCTGGTGGGATATGGG
ACVR1B_+_52345561.23-P1P2	ACVR1B	CCACCTTGTTGGGCGAGCAGGAGGACAACAAGTTTAAGAGCTAAGCTG	GGCGAGCAGGAGGACAACAA
ACVR1B_-_52345530.23-P1P2	ACVR1B	CCACCTTGTTGGgcggcggcggtggTTACTAGTTTAAGAGCTAAGCTG	GgcggcggcggtggTTACTA
ACVR1B_+_52345897.23-P1P2	ACVR1B	CCACCTTGTTGGTCCCCTCTCTGGAACACGAGTTTAAGAGCTAAGCTG	GTCCCCTCTCTGGAACACGA
ACVR1B_+_52345907.23-P1P2	ACVR1B	CCACCTTGTTGGAGGCTCAGACTCCCCTCTCGTTTAAGAGCTAAGCTG	GAGGCTCAGACTCCCCTCTC
ACVR1B_-_52345917.23-P1P2	ACVR1B	CCACCTTGTTGGGCCCTCGTGTTCCAGAGAGGTTTAAGAGCTAAGCTG	GGCCCTCGTGTTCCAGAGAG
ACVR1C_+_158484938.23-P1P2	ACVR1C	CCACCTTGTTGGAGCGCCAGTCGGATTGAGGGTTTAAGAGCTAAGCTG	GAGCGCCAGTCGGATTGAGG
ACVR1C_-_158485307.23-P1P2	ACVR1C	CCACCTTGTTGGGGTTGGCTCTAGTCAGTGTGTTTAAGAGCTAAGCTG	GGGTTGGCTCTAGTCAGTGT
ACVR1C_+_158485339.23-P1P2	ACVR1C	CCACCTTGTTGGGCGCACCGCCAGCCGCAGGGTTTAAGAGCTAAGCTG	GGCGCACCGCCAGCCGCAGG
ACVR1C_+_158484889.23-P1P2	ACVR1C	CCACCTTGTTGGTGACGTCTGGCAGCCGTAGGTTTAAGAGCTAAGCTG	GTGACGTCTGGCAGCCGTAG
ACVR1C_+_158484901.23-P1P2	ACVR1C	CCACCTTGTTGGAGCGTGGGCACCTGACGTCGTTTAAGAGCTAAGCTG	GAGCGTGGGCACCTGACGTC
ACVR2A_-_148602102.23-P1P2	ACVR2A	CCACCTTGTTGGGGCCAGGAGACCGAAAACGGTTTAAGAGCTAAGCTG	GGGCCAGGAGACCGAAAACG
ACVR2A_-_148602669.23-P1P2	ACVR2A	CCACCTTGTTGGTGTCTCCGAGGAAGACCCAGTTTAAGAGCTAAGCTG	GTGTCTCCGAGGAAGACCCA
ACVR2A_+_148602346.23-P1P2	ACVR2A	CCACCTTGTTGGCCAGGCTGAGGCGACGAAGGTTTAAGAGCTAAGCTG	GCCAGGCTGAGGCGACGAAG
ACVR2A_+_148602343.23-P1P2	ACVR2A	CCACCTTGTTGGGGCTGAGGCGACGAAGAGGGTTTAAGAGCTAAGCTG	GGGCTGAGGCGACGAAGAGG
ACVR2A_+_148602294.23-P1P2	ACVR2A	CCACCTTGTTGGGGACAGTCTGGGAACTGACGTTTAAGAGCTAAGCTG	GGGACAGTCTGGGAACTGAC
ACVR2B_+_38495339.23-P1P2	ACVR2B	CCACCTTGTTGGTGGATACAAAGAGGCGGGCGTTTAAGAGCTAAGCTG	GTGGATACAAAGAGGCGGGC
ACVR2B_+_38495606.23-P1P2	ACVR2B	CCACCTTGTTGGgccgggctcagggccgctgGTTTAAGAGCTAAGCTG	Ggccgggctcagggccgctg
ACVR2B_-_38495819.23-P1P2	ACVR2B	CCACCTTGTTGGgcggcgccgcggAACATGAGTTTAAGAGCTAAGCTG	GgcggcgccgcggAACATGA
ACVR2B_+_38495842.23-P1P2	ACVR2B	CCACCTTGTTGGGGCGCACAGCGATCCCCAGGTTTAAGAGCTAAGCTG	GGGCGCACAGCGATCCCCAG
ACVR2B_+_38495450.23-P1P2	ACVR2B	CCACCTTGTTGGCCGGAGGGGCCATGAACGGGTTTAAGAGCTAAGCTG	GCCGGAGGGGCCATGAACGG
ACVRL1_-_52300776.23-P1P2	ACVRL1	CCACCTTGTTGGGGACCCCCGGGCTGAGGGTGTTTAAGAGCTAAGCTG	GGGACCCCCGGGCTGAGGGT
ACVRL1_+_52300726.23-P1P2	ACVRL1	CCACCTTGTTGGAGGAGGCTTGCAGCAATGAGTTTAAGAGCTAAGCTG	GAGGAGGCTTGCAGCAATGA
ACVRL1_+_52300742.23-P1P2	ACVRL1	CCACCTTGTTGGCGGGGGTCCTCGGTCTAGGGTTTAAGAGCTAAGCTG	GCGGGGGTCCTCGGTCTAGG
ACVRL1_-_52301119.23-P1P2	ACVRL1	CCACCTTGTTGGGAGGGGAGGCCGCCCTGAGGTTTAAGAGCTAAGCTG	GGAGGGGAGGCCGCCCTGAG
ACVRL1_+_52300819.23-P1P2	ACVRL1	CCACCTTGTTGGGGAAGGGGCCACCGAGGAAGTTTAAGAGCTAAGCTG	GGGAAGGGGCCACCGAGGAA
ADAM10_-_59041501.23-P1P2	ADAM10	CCACCTTGTTGGTCCTCGGCCCGCCACCGAAGTTTAAGAGCTAAGCTG	GTCCTCGGCCCGCCACCGAA
ADAM10_-_59041703.23-P1P2	ADAM10	CCACCTTGTTGGCATCCCCGCCGCCCAGGAGGTTTAAGAGCTAAGCTG	GCATCCCCGCCGCCCAGGAG
ADAM10_-_59041337.23-P1P2	ADAM10	CCACCTTGTTGGGCCCGCCGAGCAGACTGGAGTTTAAGAGCTAAGCTG	GGCCCGCCGAGCAGACTGGA
ADAM10_+_59041886.23-P1P2	ADAM10	CCACCTTGTTGGGCGTTGCCGGCCCCTGAAGGTTTAAGAGCTAAGCTG	GGCGTTGCCGGCCCCTGAAG
ADAM10_+_59041561.23-P1P2	ADAM10	CCACCTTGTTGGAGTCAGCCCAGCCGGCCAGGTTTAAGAGCTAAGCTG	GAGTCAGCCCAGCCGGCCAG
ADAM11_+_42836787.23-P1P2	ADAM11	CCACCTTGTTGGCGGCCAGCTGGGGACAGGTGTTTAAGAGCTAAGCTG	GCGGCCAGCTGGGGACAGGT
ADAM11_+_42836832.23-P1P2	ADAM11	CCACCTTGTTGGTGCAGAGCTGGCCGGTCGGGTTTAAGAGCTAAGCTG	GTGCAGAGCTGGCCGGTCGG
ADAM11_+_42836733.23-P1P2	ADAM11	CCACCTTGTTGGACCCTCCCGCGCTCCGGACGTTTAAGAGCTAAGCTG	GACCCTCCCGCGCTCCGGAC
ADAM11_+_42836963.23-P1P2	ADAM11	CCACCTTGTTGGGCCCTAGGGCGATCCGGGTGTTTAAGAGCTAAGCTG	GGCCCTAGGGCGATCCGGGT
ADAM11_-_42836572.23-P1P2	ADAM11	CCACCTTGTTGGGAGGAATGAGCGAGCCATGGTTTAAGAGCTAAGCTG	GGAGGAATGAGCGAGCCATG
ADAM12_+_128076607.23-P1P2	ADAM12	CCACCTTGTTGGGAGGTAAGTCGCCGAACTAGTTTAAGAGCTAAGCTG	GGAGGTAAGTCGCCGAACTA
ADAM12_-_128077031.23-P1P2	ADAM12	CCACCTTGTTGGGAAGAGCGTTAGTGAGAGAGTTTAAGAGCTAAGCTG	GGAAGAGCGTTAGTGAGAGA
ADAM12_+_128076604.23-P1P2	ADAM12	CCACCTTGTTGGGTAAGTCGCCGAACTAGGGGTTTAAGAGCTAAGCTG	GGTAAGTCGCCGAACTAGGG
ADAM12_-_128076617.23-P1P2	ADAM12	CCACCTTGTTGGGCAGCGAGCCGCCCTAGTTGTTTAAGAGCTAAGCTG	GGCAGCGAGCCGCCCTAGTT
ADAM12_-_128076590.23-P1P2	ADAM12	CCACCTTGTTGGCAGCGTGCGGTGCCCTCGGGTTTAAGAGCTAAGCTG	GCAGCGTGCGGTGCCCTCGG
ADAM17_-_9695930.23-P1P2	ADAM17	CCACCTTGTTGGGTGCAGGTGGCGTTACCAAGTTTAAGAGCTAAGCTG	GGTGCAGGTGGCGTTACCAA
ADAM17_+_9695837.23-P1P2	ADAM17	CCACCTTGTTGGGAGGGAAAAGAGGATTGAGGTTTAAGAGCTAAGCTG	GGAGGGAAAAGAGGATTGAG
ADAM17_+_9695867.23-P1P2	ADAM17	CCACCTTGTTGGGCGGTAGAATCTTCCCAGTGTTTAAGAGCTAAGCTG	GGCGGTAGAATCTTCCCAGT
ADAM17_+_9695885.23-P1P2	ADAM17	CCACCTTGTTGGCTGGGGGCGTCGAGCCTGGGTTTAAGAGCTAAGCTG	GCTGGGGGCGTCGAGCCTGG
ADAM17_-_9695934.23-P1P2	ADAM17	CCACCTTGTTGGAGGTGGCGTTACCAAAGGCGTTTAAGAGCTAAGCTG	GAGGTGGCGTTACCAAAGGC
ADAM18_-_39442196.23-P1P2	ADAM18	CCACCTTGTTGGGAAGACTGCAAGCCCACGAGTTTAAGAGCTAAGCTG	GGAAGACTGCAAGCCCACGA
ADAM18_+_39442286.23-P1P2	ADAM18	CCACCTTGTTGGGGATCCCAGAAGGGAGAGGGTTTAAGAGCTAAGCTG	GGGATCCCAGAAGGGAGAGG
ADAM18_+_39442161.23-P1P2	ADAM18	CCACCTTGTTGGCAGTCTTCCAAGCTCAGTGGTTTAAGAGCTAAGCTG	GCAGTCTTCCAAGCTCAGTG
ADAM18_-_39442133.23-P1P2	ADAM18	CCACCTTGTTGGGGCTGTGGCTCCTGCGCTCGTTTAAGAGCTAAGCTG	GGGCTGTGGCTCCTGCGCTC
ADAM18_+_39442506.23-P1P2	ADAM18	CCACCTTGTTGGTTGCTTCCTCAGGACTCTGGTTTAAGAGCTAAGCTG	GTTGCTTCCTCAGGACTCTG
ADAM19_+_157002746.23-P1P2	ADAM19	CCACCTTGTTGGGCCGGGCAGTGGGCAGGTAGTTTAAGAGCTAAGCTG	GGCCGGGCAGTGGGCAGGTA
ADAM19_-_157002314.23-P1P2	ADAM19	CCACCTTGTTGGGGAGGATAAGCCCCGAGAAGTTTAAGAGCTAAGCTG	GGGAGGATAAGCCCCGAGAA
ADAM19_-_157002317.23-P1P2	ADAM19	CCACCTTGTTGGGGATAAGCCCCGAGAACGGGTTTAAGAGCTAAGCTG	GGGATAAGCCCCGAGAACGG
ADAM19_-_157002452.23-P1P2	ADAM19	CCACCTTGTTGGCTCCCAGGGCGCAGAACGTGTTTAAGAGCTAAGCTG	GCTCCCAGGGCGCAGAACGT
ADAM19_-_157002294.23-P1P2	ADAM19	CCACCTTGTTGGAGGGACCGTGAGAAAACGGGTTTAAGAGCTAAGCTG	GAGGGACCGTGAGAAAACGG
ADAM2_-_39695737.23-P1P2	ADAM2	CCACCTTGTTGGTGGGTCCCAGCCGGAATAAGTTTAAGAGCTAAGCTG	GTGGGTCCCAGCCGGAATAA
ADAM2_-_39695635.23-P1P2	ADAM2	CCACCTTGTTGGTCCCAAAAGGCCAGAGGAGGTTTAAGAGCTAAGCTG	GTCCCAAAAGGCCAGAGGAG
ADAM2_-_39695260.23-P1P2	ADAM2	CCACCTTGTTGGGGAGTATTGCCCTGTAGGTGTTTAAGAGCTAAGCTG	GGGAGTATTGCCCTGTAGGT
ADAM2_+_39695270.23-P1P2	ADAM2	CCACCTTGTTGGGCTTGAACCTATTGACCCAGTTTAAGAGCTAAGCTG	GGCTTGAACCTATTGACCCA
ADAM2_-_39695623.23-P1P2	ADAM2	CCACCTTGTTGGTAGCGCTGAGGGTCCCAAAGTTTAAGAGCTAAGCTG	GTAGCGCTGAGGGTCCCAAA
ADAM20_-_71001696.23-P1P2	ADAM20	CCACCTTGTTGGGGGAATCTGAGATTGATGTGTTTAAGAGCTAAGCTG	GGGGAATCTGAGATTGATGT
ADAM20_+_71001702.23-P1P2	ADAM20	CCACCTTGTTGGAGCAGTGTGTTTAAGACTAGTTTAAGAGCTAAGCTG	GAGCAGTGTGTTTAAGACTA
ADAM20_-_71001740.23-P1P2	ADAM20	CCACCTTGTTGGCTGCTGAACTCCCATCCAAGTTTAAGAGCTAAGCTG	GCTGCTGAACTCCCATCCAA
ADAM20_-_71001316.23-P1P2	ADAM20	CCACCTTGTTGGcagaatgattccacttacgGTTTAAGAGCTAAGCTG	Gcagaatgattccacttacg
ADAM20_-_71001647.23-P1P2	ADAM20	CCACCTTGTTGGAGACACAAGACTTGGTACTGTTTAAGAGCTAAGCTG	GAGACACAAGACTTGGTACT
ADAM21_+_70918885.23-P1P2	ADAM21	CCACCTTGTTGGAGCTGAGGCCACAGAACAAGTTTAAGAGCTAAGCTG	GAGCTGAGGCCACAGAACAA
ADAM21_-_70918928.23-P1P2	ADAM21	CCACCTTGTTGGACAAACCATTGATAAAGCAGTTTAAGAGCTAAGCTG	GACAAACCATTGATAAAGCA
ADAM21_-_70919038.23-P1P2	ADAM21	CCACCTTGTTGGGGTATCCAGAGTAGTCCACGTTTAAGAGCTAAGCTG	GGGTATCCAGAGTAGTCCAC
ADAM21_+_70919032.23-P1P2	ADAM21	CCACCTTGTTGGGAGACTTCACATTATCCAGGTTTAAGAGCTAAGCTG	GGAGACTTCACATTATCCAG
ADAM21_+_70919022.23-P1P2	ADAM21	CCACCTTGTTGGATTATCCAGTGGACTACTCGTTTAAGAGCTAAGCTG	GATTATCCAGTGGACTACTC
ADAM22_+_87563621.23-P1P2	ADAM22	CCACCTTGTTGGGGCGCTGCAACCTCCACCGGTTTAAGAGCTAAGCTG	GGGCGCTGCAACCTCCACCG
ADAM22_-_87563632.23-P1P2	ADAM22	CCACCTTGTTGGCAGCACTGAGCCGCGGTGGGTTTAAGAGCTAAGCTG	GCAGCACTGAGCCGCGGTGG
ADAM22_-_87563945.23-P1P2	ADAM22	CCACCTTGTTGGCTCAGGCGTATTGAAAAGGGTTTAAGAGCTAAGCTG	GCTCAGGCGTATTGAAAAGG
ADAM22_-_87564057.23-P1P2	ADAM22	CCACCTTGTTGGTGGAGGCGCGCAGATGCACGTTTAAGAGCTAAGCTG	GTGGAGGCGCGCAGATGCAC
ADAM22_+_87563949.23-P1P2	ADAM22	CCACCTTGTTGGCCCGCGCACTCGGGAAATGGTTTAAGAGCTAAGCTG	GCCCGCGCACTCGGGAAATG
ADAM23_+_207308275.23-P1P2	ADAM23	CCACCTTGTTGGGCCGCTTCAGCGACTGCGGGTTTAAGAGCTAAGCTG	GGCCGCTTCAGCGACTGCGG
ADAM23_+_207308623.23-P1P2	ADAM23	CCACCTTGTTGGCAAGGCTGCAGCCCGCCAGGTTTAAGAGCTAAGCTG	GCAAGGCTGCAGCCCGCCAG
ADAM23_-_207308263.23-P1P2	ADAM23	CCACCTTGTTGGgcgccgccTCAGCATCCTCGTTTAAGAGCTAAGCTG	GgcgccgccTCAGCATCCTC
ADAM23_-_207308295.23-P1P2	ADAM23	CCACCTTGTTGGGCCCCCGCAGTCGCTGAAGGTTTAAGAGCTAAGCTG	GGCCCCCGCAGTCGCTGAAG
ADAM23_+_207308716.23-P1P2	ADAM23	CCACCTTGTTGGGGACGAGAAGCAGGCGGCAGTTTAAGAGCTAAGCTG	GGGACGAGAAGCAGGCGGCA
ADAM28_+_24151604.23-P1P2	ADAM28	CCACCTTGTTGGCGCTCAGGTGGGTGCTGCTGTTTAAGAGCTAAGCTG	GCGCTCAGGTGGGTGCTGCT
ADAM28_+_24151691.23-P1P2	ADAM28	CCACCTTGTTGGTGTACCTGCAACAGAGAGGGTTTAAGAGCTAAGCTG	GTGTACCTGCAACAGAGAGG
ADAM28_+_24151656.23-P1P2	ADAM28	CCACCTTGTTGGGGAGACCTTGCAACATGCTGTTTAAGAGCTAAGCTG	GGGAGACCTTGCAACATGCT
ADAM28_+_24151615.23-P1P2	ADAM28	CCACCTTGTTGGTCTGCTCTTCTCGCTCAGGGTTTAAGAGCTAAGCTG	GTCTGCTCTTCTCGCTCAGG
ADAM28_+_24151646.23-P1P2	ADAM28	CCACCTTGTTGGCAACATGCTGGGTGATTCCGTTTAAGAGCTAAGCTG	GCAACATGCTGGGTGATTCC
ADAM29_+_175839643.23-P1P2	ADAM29	CCACCTTGTTGGTGTGTAAAGAGTACAGGTAGTTTAAGAGCTAAGCTG	GTGTGTAAAGAGTACAGGTA
ADAM29_+_175839595.23-P1P2	ADAM29	CCACCTTGTTGGTGTGATCGAGGGCGTCCTCGTTTAAGAGCTAAGCTG	GTGTGATCGAGGGCGTCCTC
ADAM29_-_175839539.23-P1P2	ADAM29	CCACCTTGTTGGATCCACTAACCAAATGGGGGTTTAAGAGCTAAGCTG	GATCCACTAACCAAATGGGG
ADAM29_+_175839605.23-P1P2	ADAM29	CCACCTTGTTGGATAACCTGCTTGTGATCGAGTTTAAGAGCTAAGCTG	GATAACCTGCTTGTGATCGA
ADAM29_-_175839601.23-P1P2	ADAM29	CCACCTTGTTGGTGTTCCTGCACATTTCCTGGTTTAAGAGCTAAGCTG	GTGTTCCTGCACATTTCCTG
ADAM30_+_120439094.23-P1P2	ADAM30	CCACCTTGTTGGACCGAGCCCTGGGAGGCTAGTTTAAGAGCTAAGCTG	GACCGAGCCCTGGGAGGCTA
ADAM30_-_120439090.23-P1P2	ADAM30	CCACCTTGTTGGCCCCTGGCAGGGTTTCCGGGTTTAAGAGCTAAGCTG	GCCCCTGGCAGGGTTTCCGG
ADAM30_+_120439103.23-P1P2	ADAM30	CCACCTTGTTGGGCCAGCTAGACCGAGCCCTGTTTAAGAGCTAAGCTG	GGCCAGCTAGACCGAGCCCT
ADAM30_-_120439075.23-P1P2	ADAM30	CCACCTTGTTGGGCTCAAAACCCGGCTCCCCGTTTAAGAGCTAAGCTG	GGCTCAAAACCCGGCTCCCC
ADAM30_+_120439037.23-P1P2	ADAM30	CCACCTTGTTGGTGAGCTCAGGCGCCTCTAGGTTTAAGAGCTAAGCTG	GTGAGCTCAGGCGCCTCTAG
ADAM32_-_38965521.23-P1P2	ADAM32	CCACCTTGTTGGCGGATGGAGAAGCGACTCAGTTTAAGAGCTAAGCTG	GCGGATGGAGAAGCGACTCA
ADAM32_+_38965299.23-P1P2	ADAM32	CCACCTTGTTGGGGCCAGCAGCAACCAGAGGGTTTAAGAGCTAAGCTG	GGGCCAGCAGCAACCAGAGG
ADAM32_+_38965287.23-P1P2	ADAM32	CCACCTTGTTGGCCAGAGGCGGAACATGGTGGTTTAAGAGCTAAGCTG	GCCAGAGGCGGAACATGGTG
ADAM32_-_38965264.23-P1P2	ADAM32	CCACCTTGTTGGGCAATTCCCGACTTCCCAAGTTTAAGAGCTAAGCTG	GGCAATTCCCGACTTCCCAA
ADAM32_+_38965125.23-P1P2	ADAM32	CCACCTTGTTGGTTAGCGTCCGGAACACGAAGTTTAAGAGCTAAGCTG	GTTAGCGTCCGGAACACGAA
ADAM33_-_3662638.23-P1P2	ADAM33	CCACCTTGTTGGGGGTCCCCCGAGCTCTCCGGTTTAAGAGCTAAGCTG	GGGGTCCCCCGAGCTCTCCG
ADAM33_-_3662194.23-P1P2	ADAM33	CCACCTTGTTGGGCAGGAGCGGGTCACACGGGTTTAAGAGCTAAGCTG	GGCAGGAGCGGGTCACACGG
ADAM33_+_3662271.23-P1P2	ADAM33	CCACCTTGTTGGATGGCTCCCTCCCCCTCGGGTTTAAGAGCTAAGCTG	GATGGCTCCCTCCCCCTCGG
ADAM33_+_3662642.23-P1P2	ADAM33	CCACCTTGTTGGGGAGCTCACAGCTATGGGCGTTTAAGAGCTAAGCTG	GGGAGCTCACAGCTATGGGC
ADAM33_-_3662191.23-P1P2	ADAM33	CCACCTTGTTGGGGAGCAGGAGCGGGTCACAGTTTAAGAGCTAAGCTG	GGGAGCAGGAGCGGGTCACA
ADAM7_-_24298561.23-P1P2	ADAM7	CCACCTTGTTGGCCCTGCAGTGGAAGTGAGGGTTTAAGAGCTAAGCTG	GCCCTGCAGTGGAAGTGAGG
ADAM7_-_24298558.23-P1P2	ADAM7	CCACCTTGTTGGCATCCCTGCAGTGGAAGTGGTTTAAGAGCTAAGCTG	GCATCCCTGCAGTGGAAGTG
ADAM7_+_24298515.23-P1P2	ADAM7	CCACCTTGTTGGAAGCACCTCACAGATAGGTGTTTAAGAGCTAAGCTG	GAAGCACCTCACAGATAGGT
ADAM7_+_24298519.23-P1P2	ADAM7	CCACCTTGTTGGGATGAAGCACCTCACAGATGTTTAAGAGCTAAGCTG	GGATGAAGCACCTCACAGAT
ADAM7_+_24298600.23-P1P2	ADAM7	CCACCTTGTTGGTTCTGAGTGATTCTGGTAGGTTTAAGAGCTAAGCTG	GTTCTGAGTGATTCTGGTAG
ADAM8_-_135089932.23-P1P2	ADAM8	CCACCTTGTTGGCTCCTCGGCTAAATAGTGGGTTTAAGAGCTAAGCTG	GCTCCTCGGCTAAATAGTGG
ADAM8_-_135090331.23-P1P2	ADAM8	CCACCTTGTTGGAGGCCGCGCATGGCCGGGTGTTTAAGAGCTAAGCTG	GAGGCCGCGCATGGCCGGGT
ADAM8_-_135090373.23-P1P2	ADAM8	CCACCTTGTTGGAGCCCCGCGGGACACGGTCGTTTAAGAGCTAAGCTG	GAGCCCCGCGGGACACGGTC
ADAM8_+_135090313.23-P1P2	ADAM8	CCACCTTGTTGGTCCCCGACCCGGCCATGCGGTTTAAGAGCTAAGCTG	GTCCCCGACCCGGCCATGCG
ADAM8_-_135089929.23-P1P2	ADAM8	CCACCTTGTTGGTCCCTCCTCGGCTAAATAGGTTTAAGAGCTAAGCTG	GTCCCTCCTCGGCTAAATAG
ADAM9_+_38854902.23-P1P2	ADAM9	CCACCTTGTTGGTCCATCGAACAGGACACGGGTTTAAGAGCTAAGCTG	GTCCATCGAACAGGACACGG
ADAM9_-_38854499.23-P1P2	ADAM9	CCACCTTGTTGGGCGCTTCCCGGCCAGACTTGTTTAAGAGCTAAGCTG	GGCGCTTCCCGGCCAGACTT
ADAM9_+_38854489.23-P1P2	ADAM9	CCACCTTGTTGGCCTGCCGGGGCCCCAAGTCGTTTAAGAGCTAAGCTG	GCCTGCCGGGGCCCCAAGTC
ADAM9_-_38854669.23-P1P2	ADAM9	CCACCTTGTTGGGTGGGCCCAGTCCTCGGTGGTTTAAGAGCTAAGCTG	GGTGGGCCCAGTCCTCGGTG
ADAM9_-_38854525.23-P1P2	ADAM9	CCACCTTGTTGGCGGCAGGGTTGGAAAATGAGTTTAAGAGCTAAGCTG	GCGGCAGGGTTGGAAAATGA
ADAMTS1_+_28217664.23-P1	ADAMTS1	CCACCTTGTTGGGCCAGGGTGCGCTACCGGAGTTTAAGAGCTAAGCTG	GGCCAGGGTGCGCTACCGGA
ADAMTS1_+_28217696.23-P1	ADAMTS1	CCACCTTGTTGGGAAAGCGGCTCCGAGCCAGGTTTAAGAGCTAAGCTG	GGAAAGCGGCTCCGAGCCAG
ADAMTS1_+_28217278.23-P1	ADAMTS1	CCACCTTGTTGGCTACGAGCGGTGTCTCCTGGTTTAAGAGCTAAGCTG	GCTACGAGCGGTGTCTCCTG
ADAMTS1_+_28217659.23-P1	ADAMTS1	CCACCTTGTTGGGGTGCGCTACCGGACGGAGGTTTAAGAGCTAAGCTG	GGGTGCGCTACCGGACGGAG
ADAMTS1_-_28217257.23-P1	ADAMTS1	CCACCTTGTTGGTGCGCCTTCCGAACCCCTCGTTTAAGAGCTAAGCTG	GTGCGCCTTCCGAACCCCTC
ADAMTS1_+_28216570.23-P2	ADAMTS1	CCACCTTGTTGGCAGTGGTCGCCGCAGGACCGTTTAAGAGCTAAGCTG	GCAGTGGTCGCCGCAGGACC
ADAMTS1_+_28216594.23-P2	ADAMTS1	CCACCTTGTTGGACTGAGGGCGAGGACGAAGGTTTAAGAGCTAAGCTG	GACTGAGGGCGAGGACGAAG
ADAMTS1_+_28216554.23-P2	ADAMTS1	CCACCTTGTTGGACCCGGCACTGCAAGGCGTGTTTAAGAGCTAAGCTG	GACCCGGCACTGCAAGGCGT
ADAMTS1_-_28216131.23-P2	ADAMTS1	CCACCTTGTTGGGAGCGCAGGATGCACGCACGTTTAAGAGCTAAGCTG	GGAGCGCAGGATGCACGCAC
ADAMTS1_-_28216582.23-P2	ADAMTS1	CCACCTTGTTGGCTTGCAGTGCCGGGTCCTGGTTTAAGAGCTAAGCTG	GCTTGCAGTGCCGGGTCCTG
ADAMTS10_+_8675562.23-P1P2	ADAMTS10	CCACCTTGTTGGGCgcggggcggcgagacagGTTTAAGAGCTAAGCTG	GGCgcggggcggcgagacag
ADAMTS10_+_8675521.23-P1P2	ADAMTS10	CCACCTTGTTGGccgggcgcggcgcaggtagGTTTAAGAGCTAAGCTG	Gccgggcgcggcgcaggtag
ADAMTS10_-_8675371.23-P1P2	ADAMTS10	CCACCTTGTTGGCAACCCCGGGCGTGATCAGGTTTAAGAGCTAAGCTG	GCAACCCCGGGCGTGATCAG
ADAMTS10_+_8675559.23-P1P2	ADAMTS10	CCACCTTGTTGGcggggcggcgagacagcggGTTTAAGAGCTAAGCTG	Gcggggcggcgagacagcgg
ADAMTS10_-_8675595.23-P1P2	ADAMTS10	CCACCTTGTTGGcgccccgcGCGCGCAGGAAGTTTAAGAGCTAAGCTG	GcgccccgcGCGCGCAGGAA
ADAMTS12_-_33892078.23-P1P2	ADAMTS12	CCACCTTGTTGGTGCATGGTCAGGCGCGAGAGTTTAAGAGCTAAGCTG	GTGCATGGTCAGGCGCGAGA
ADAMTS12_+_33892096.23-P1P2	ADAMTS12	CCACCTTGTTGGAAAAGCACAGGGAGATCGCGTTTAAGAGCTAAGCTG	GAAAAGCACAGGGAGATCGC
ADAMTS12_-_33891689.23-P1P2	ADAMTS12	CCACCTTGTTGGGAGAAAGCCTAGGCTCCTGGTTTAAGAGCTAAGCTG	GGAGAAAGCCTAGGCTCCTG
ADAMTS12_+_33891838.23-P1P2	ADAMTS12	CCACCTTGTTGGGGTTCGCTTCCCGGACAGGGTTTAAGAGCTAAGCTG	GGGTTCGCTTCCCGGACAGG
ADAMTS12_-_33892035.23-P1P2	ADAMTS12	CCACCTTGTTGGGAAATAAAGCGCTCGCCTGGTTTAAGAGCTAAGCTG	GGAAATAAAGCGCTCGCCTG
ADAMTS14_+_72432279.23-P1P2	ADAMTS14	CCACCTTGTTGGGTGCCAACTGCCGGCTGGTGTTTAAGAGCTAAGCTG	GGTGCCAACTGCCGGCTGGT
ADAMTS14_-_72432290.23-P1P2	ADAMTS14	CCACCTTGTTGGGGCGGGCTGACCGACCAGCGTTTAAGAGCTAAGCTG	GGGCGGGCTGACCGACCAGC
ADAMTS14_-_72432297.23-P1P2	ADAMTS14	CCACCTTGTTGGTGACCGACCAGCCGGCAGTGTTTAAGAGCTAAGCTG	GTGACCGACCAGCCGGCAGT
ADAMTS14_+_72432594.23-P1P2	ADAMTS14	CCACCTTGTTGGCGCAGAGCGCACAGTGCAAGTTTAAGAGCTAAGCTG	GCGCAGAGCGCACAGTGCAA
ADAMTS14_-_72432269.23-P1P2	ADAMTS14	CCACCTTGTTGGGTCCCGGAGCGTCACTGCGGTTTAAGAGCTAAGCTG	GGTCCCGGAGCGTCACTGCG
ADAMTS15_+_130318981.23-P1P2	ADAMTS15	CCACCTTGTTGGGGGACCCCGCCAGTAGTAGGTTTAAGAGCTAAGCTG	GGGGACCCCGCCAGTAGTAG
ADAMTS15_+_130318978.23-P1P2	ADAMTS15	CCACCTTGTTGGACCCCGCCAGTAGTAGCGGGTTTAAGAGCTAAGCTG	GACCCCGCCAGTAGTAGCGG
ADAMTS15_+_130318578.23-P1P2	ADAMTS15	CCACCTTGTTGGGCAGCCGAGAACTAGCGGAGTTTAAGAGCTAAGCTG	GGCAGCCGAGAACTAGCGGA
ADAMTS15_+_130318949.23-P1P2	ADAMTS15	CCACCTTGTTGGTGTCCGGGTCCAGTCGGATGTTTAAGAGCTAAGCTG	GTGTCCGGGTCCAGTCGGAT
ADAMTS15_-_130318977.23-P1P2	ADAMTS15	CCACCTTGTTGGGACTGGACCCGGACATTAAGTTTAAGAGCTAAGCTG	GGACTGGACCCGGACATTAA
ADAMTS16_+_5146341.23-P1	ADAMTS16	CCACCTTGTTGGAGGTGAAGAGACTCAACCTGTTTAAGAGCTAAGCTG	GAGGTGAAGAGACTCAACCT
ADAMTS16_+_5146334.23-P1	ADAMTS16	CCACCTTGTTGGGAGACTCAACCTCGGACACGTTTAAGAGCTAAGCTG	GGAGACTCAACCTCGGACAC
ADAMTS16_+_5146377.23-P1	ADAMTS16	CCACCTTGTTGGTCCATGTGGAAGTCGTGCCGTTTAAGAGCTAAGCTG	GTCCATGTGGAAGTCGTGCC
ADAMTS16_-_5146381.23-P1	ADAMTS16	CCACCTTGTTGGCCTTCGGCTGAAAGGCTCCGTTTAAGAGCTAAGCTG	GCCTTCGGCTGAAAGGCTCC
ADAMTS16_-_5146595.23-P1	ADAMTS16	CCACCTTGTTGGACAGCGCAAGCCCCAGGTAGTTTAAGAGCTAAGCTG	GACAGCGCAAGCCCCAGGTA
ADAMTS16_+_5140497.23-P2	ADAMTS16	CCACCTTGTTGGGGCAGGGAGGACCCGACCCGTTTAAGAGCTAAGCTG	GGGCAGGGAGGACCCGACCC
ADAMTS16_+_5140912.23-P2	ADAMTS16	CCACCTTGTTGGGAGATTACGAGCTGCTAAAGTTTAAGAGCTAAGCTG	GGAGATTACGAGCTGCTAAA
ADAMTS16_+_5140486.23-P2	ADAMTS16	CCACCTTGTTGGCCCGACCCAGGCAGAGCGCGTTTAAGAGCTAAGCTG	GCCCGACCCAGGCAGAGCGC
ADAMTS16_+_5140760.23-P2	ADAMTS16	CCACCTTGTTGGAGGTGCCTGCGGAAAACAGGTTTAAGAGCTAAGCTG	GAGGTGCCTGCGGAAAACAG
ADAMTS16_+_5140517.23-P2	ADAMTS16	CCACCTTGTTGGCGGCCGGCAGCGTGCGAGCGTTTAAGAGCTAAGCTG	GCGGCCGGCAGCGTGCGAGC
ADAMTS17_-_100882166.23-P1P2	ADAMTS17	CCACCTTGTTGGGCAGGAGCGCGCTAGGCGGGTTTAAGAGCTAAGCTG	GGCAGGAGCGCGCTAGGCGG
ADAMTS17_-_100882118.23-P1P2	ADAMTS17	CCACCTTGTTGGCACACATGGTACCCGGGACGTTTAAGAGCTAAGCTG	GCACACATGGTACCCGGGAC
ADAMTS17_-_100882163.23-P1P2	ADAMTS17	CCACCTTGTTGGGAAGCAGGAGCGCGCTAGGGTTTAAGAGCTAAGCTG	GGAAGCAGGAGCGCGCTAGG
ADAMTS17_-_100882079.23-P1P2	ADAMTS17	CCACCTTGTTGGGCAGCACGGGCAGGACGAGGTTTAAGAGCTAAGCTG	GGCAGCACGGGCAGGACGAG
ADAMTS17_+_100882122.23-P1P2	ADAMTS17	CCACCTTGTTGGTCGCCGCCACGGTCCGGGGGTTTAAGAGCTAAGCTG	GTCGCCGCCACGGTCCGGGG
ADAMTS18_+_77468890.23-P1P2	ADAMTS18	CCACCTTGTTGGGACAGACGCACAGACGGGCGTTTAAGAGCTAAGCTG	GGACAGACGCACAGACGGGC
ADAMTS18_-_77468873.23-P1P2	ADAMTS18	CCACCTTGTTGGGACTGGAGCGCAAACGGTTGTTTAAGAGCTAAGCTG	GGACTGGAGCGCAAACGGTT
ADAMTS18_+_77468714.23-P1P2	ADAMTS18	CCACCTTGTTGGCCCGCTGCGATGTGAACGGGTTTAAGAGCTAAGCTG	GCCCGCTGCGATGTGAACGG
ADAMTS18_-_77468494.23-P1P2	ADAMTS18	CCACCTTGTTGGCTCTCGGAGCTCCGCTCGGGTTTAAGAGCTAAGCTG	GCTCTCGGAGCTCCGCTCGG
ADAMTS18_+_77468466.23-P1P2	ADAMTS18	CCACCTTGTTGGGCGGAGCTCCGAGAGCGGGGTTTAAGAGCTAAGCTG	GGCGGAGCTCCGAGAGCGGG
ADAMTS19_+_128796021.23-P1P2	ADAMTS19	CCACCTTGTTGGTCCAGCGCGATCCACTCCGGTTTAAGAGCTAAGCTG	GTCCAGCGCGATCCACTCCG
ADAMTS19_+_128796013.23-P1P2	ADAMTS19	CCACCTTGTTGGGATCCACTCCGGGGCGCAGGTTTAAGAGCTAAGCTG	GGATCCACTCCGGGGCGCAG
ADAMTS19_-_128796009.23-P1P2	ADAMTS19	CCACCTTGTTGGCCGGCCTCCTAGCGCTCCGGTTTAAGAGCTAAGCTG	GCCGGCCTCCTAGCGCTCCG
ADAMTS19_-_128796244.23-P1P2	ADAMTS19	CCACCTTGTTGGAGACCGCGAACGTACGGGTGTTTAAGAGCTAAGCTG	GAGACCGCGAACGTACGGGT
ADAMTS19_-_128796089.23-P1P2	ADAMTS19	CCACCTTGTTGGGCCGCGGGAGCGCAGTATGGTTTAAGAGCTAAGCTG	GGCCGCGGGAGCGCAGTATG
ADAMTS2_-_178772408.23-P1P2	ADAMTS2	CCACCTTGTTGGGCCGCCCAGCCCACATCTGGTTTAAGAGCTAAGCTG	GGCCGCCCAGCCCACATCTG
ADAMTS2_-_178772444.23-P1P2	ADAMTS2	CCACCTTGTTGGCCGCAGCTGCAGCACCGCAGTTTAAGAGCTAAGCTG	GCCGCAGCTGCAGCACCGCA
ADAMTS2_-_178772008.23-P1P2	ADAMTS2	CCACCTTGTTGGCCCGGCCCAAGGCGCTCGGGTTTAAGAGCTAAGCTG	GCCCGGCCCAAGGCGCTCGG
ADAMTS2_+_178772088.23-P1P2	ADAMTS2	CCACCTTGTTGGGCGTCGTCCAGCCTGACTTGTTTAAGAGCTAAGCTG	GGCGTCGTCCAGCCTGACTT
ADAMTS2_+_178772185.23-P1P2	ADAMTS2	CCACCTTGTTGGCGCCGCCGACCCCCCAGGTGTTTAAGAGCTAAGCTG	GCGCCGCCGACCCCCCAGGT
ADAMTS20_+_43945551.23-P1P2	ADAMTS20	CCACCTTGTTGGTGCAGGTCGCGGGGACGAGGTTTAAGAGCTAAGCTG	GTGCAGGTCGCGGGGACGAG
ADAMTS20_+_43945593.23-P1P2	ADAMTS20	CCACCTTGTTGGGCCTTCAGCGGCTAAGTGGGTTTAAGAGCTAAGCTG	GGCCTTCAGCGGCTAAGTGG
ADAMTS20_+_43945717.23-P1P2	ADAMTS20	CCACCTTGTTGGCCCCAGGGTGGAACCATGTGTTTAAGAGCTAAGCTG	GCCCCAGGGTGGAACCATGT
ADAMTS20_+_43945604.23-P1P2	ADAMTS20	CCACCTTGTTGGCACCGCGAGACGCCTTCAGGTTTAAGAGCTAAGCTG	GCACCGCGAGACGCCTTCAG
ADAMTS20_-_43945984.23-P1P2	ADAMTS20	CCACCTTGTTGGCCTCAGAAACTCTCTGCTCGTTTAAGAGCTAAGCTG	GCCTCAGAAACTCTCTGCTC
ADAMTS3_-_73434891.23-P1P2	ADAMTS3	CCACCTTGTTGGGGTTCCCCGGAGCACAGCAGTTTAAGAGCTAAGCTG	GGGTTCCCCGGAGCACAGCA
ADAMTS3_-_73434871.23-P1P2	ADAMTS3	CCACCTTGTTGGGTTAGCGCGGAGAATGCTTGTTTAAGAGCTAAGCTG	GGTTAGCGCGGAGAATGCTT
ADAMTS3_-_73434922.23-P1P2	ADAMTS3	CCACCTTGTTGGAGCGAGAGAGACGAGCGAGGTTTAAGAGCTAAGCTG	GAGCGAGAGAGACGAGCGAG
ADAMTS3_-_73434879.23-P1P2	ADAMTS3	CCACCTTGTTGGGGAGAATGCTTGGGTTCCCGTTTAAGAGCTAAGCTG	GGGAGAATGCTTGGGTTCCC
ADAMTS3_-_73434972.23-P1P2	ADAMTS3	CCACCTTGTTGGGACTCCGCCGCACACGCAgGTTTAAGAGCTAAGCTG	GGACTCCGCCGCACACGCAg
ADAMTS4_-_161168458.23-P1P2	ADAMTS4	CCACCTTGTTGGGAGGGACTGAGGCCGTCTAGTTTAAGAGCTAAGCTG	GGAGGGACTGAGGCCGTCTA
ADAMTS4_+_161168828.23-P1P2	ADAMTS4	CCACCTTGTTGGAGGCTGGGGAGAACCCACAGTTTAAGAGCTAAGCTG	GAGGCTGGGGAGAACCCACA
ADAMTS4_-_161168836.23-P1P2	ADAMTS4	CCACCTTGTTGGTGTCTGTGGGTCTCCCTGTGTTTAAGAGCTAAGCTG	GTGTCTGTGGGTCTCCCTGT
ADAMTS4_-_161168418.23-P1P2	ADAMTS4	CCACCTTGTTGGTGCGAGCCTGTCTGGGACAGTTTAAGAGCTAAGCTG	GTGCGAGCCTGTCTGGGACA
ADAMTS4_-_161168616.23-P1P2	ADAMTS4	CCACCTTGTTGGGCTTGGGAGAGGTGCCCAGGTTTAAGAGCTAAGCTG	GGCTTGGGAGAGGTGCCCAG
ADAMTS5_-_28339372.23-P1P2	ADAMTS5	CCACCTTGTTGGGCCCGCCGTCATCCCCAGTGTTTAAGAGCTAAGCTG	GGCCCGCCGTCATCCCCAGT
ADAMTS5_-_28338950.23-P1P2	ADAMTS5	CCACCTTGTTGGCGTGCTCCAGAAAGAGGTGGTTTAAGAGCTAAGCTG	GCGTGCTCCAGAAAGAGGTG
ADAMTS5_-_28339421.23-P1P2	ADAMTS5	CCACCTTGTTGGGCGCTGTGAAGATGCGAGGGTTTAAGAGCTAAGCTG	GGCGCTGTGAAGATGCGAGG
ADAMTS5_+_28339363.23-P1P2	ADAMTS5	CCACCTTGTTGGCGCTCGCAGCTGCCGACTGGTTTAAGAGCTAAGCTG	GCGCTCGCAGCTGCCGACTG
ADAMTS5_+_28339356.23-P1P2	ADAMTS5	CCACCTTGTTGGAGCTGCCGACTGGGGATGAGTTTAAGAGCTAAGCTG	GAGCTGCCGACTGGGGATGA
ADAMTS6_+_64777661.23-P1P2	ADAMTS6	CCACCTTGTTGGGGGCCGGTAGTGAGATCTAGTTTAAGAGCTAAGCTG	GGGGCCGGTAGTGAGATCTA
ADAMTS6_-_64777602.23-P1P2	ADAMTS6	CCACCTTGTTGGACATGTGCAGAGCATCAAAGTTTAAGAGCTAAGCTG	GACATGTGCAGAGCATCAAA
ADAMTS6_-_64777679.23-P1P2	ADAMTS6	CCACCTTGTTGGTAGCCCTAGATCTCACTACGTTTAAGAGCTAAGCTG	GTAGCCCTAGATCTCACTAC
ADAMTS6_+_64777310.23-P1P2	ADAMTS6	CCACCTTGTTGGTGGCTGCAGAATAACTGGCGTTTAAGAGCTAAGCTG	GTGGCTGCAGAATAACTGGC
ADAMTS6_+_64777340.23-P1P2	ADAMTS6	CCACCTTGTTGGCCGGGTTAGCCAGACCATAGTTTAAGAGCTAAGCTG	GCCGGGTTAGCCAGACCATA
ADAMTS7_-_79103729.23-P1P2	ADAMTS7	CCACCTTGTTGGCTCGGTCCGCGGGCAACAAGTTTAAGAGCTAAGCTG	GCTCGGTCCGCGGGCAACAA
ADAMTS7_-_79103383.23-P1P2	ADAMTS7	CCACCTTGTTGGGCCGGCGCGGGGTCCACAAGTTTAAGAGCTAAGCTG	GGCCGGCGCGGGGTCCACAA
ADAMTS7_-_79103352.23-P1P2	ADAMTS7	CCACCTTGTTGGGGAAGACGCGACCAACTCCGTTTAAGAGCTAAGCTG	GGGAAGACGCGACCAACTCC
ADAMTS7_-_79103411.23-P1P2	ADAMTS7	CCACCTTGTTGGGGGACAAAACCGAGACTGGGTTTAAGAGCTAAGCTG	GGGGACAAAACCGAGACTGG
ADAMTS7_+_79103687.23-P1P2	ADAMTS7	CCACCTTGTTGGGCGCAGCCGAACGGAGTCGGTTTAAGAGCTAAGCTG	GGCGCAGCCGAACGGAGTCG
ADAMTS8_-_130298054.23-P1P2	ADAMTS8	CCACCTTGTTGGCGCTGCCGGGCAACCGCGTGTTTAAGAGCTAAGCTG	GCGCTGCCGGGCAACCGCGT
ADAMTS8_-_130298510.23-P1P2	ADAMTS8	CCACCTTGTTGGACCCCGGGAAGCACCGAGTGTTTAAGAGCTAAGCTG	GACCCCGGGAAGCACCGAGT
ADAMTS8_+_130298490.23-P1P2	ADAMTS8	CCACCTTGTTGGGCCCACTCGGTGCTTCCCGGTTTAAGAGCTAAGCTG	GGCCCACTCGGTGCTTCCCG
ADAMTS8_-_130297973.23-P1P2	ADAMTS8	CCACCTTGTTGGGCGCTAGGAAGCTGTCGTCGTTTAAGAGCTAAGCTG	GGCGCTAGGAAGCTGTCGTC
ADAMTS8_-_130298160.23-P1P2	ADAMTS8	CCACCTTGTTGGcaggagcggaggccaccggGTTTAAGAGCTAAGCTG	Gcaggagcggaggccaccgg
ADAMTS9_-_64673267.23-P1P2	ADAMTS9	CCACCTTGTTGGCACGGCCGCCGCGGCGTCTGTTTAAGAGCTAAGCTG	GCACGGCCGCCGCGGCGTCT
ADAMTS9_-_64673280.23-P1P2	ADAMTS9	CCACCTTGTTGGGCGTCTGGGCTCCCCATCTGTTTAAGAGCTAAGCTG	GGCGTCTGGGCTCCCCATCT
ADAMTS9_+_64673234.23-P1P2	ADAMTS9	CCACCTTGTTGGGGCGGCCGTGCGCAAGGACGTTTAAGAGCTAAGCTG	GGGCGGCCGTGCGCAAGGAC
ADAMTS9_-_64673170.23-P1P2	ADAMTS9	CCACCTTGTTGGCTGCCCAGGAGCGAGGACCGTTTAAGAGCTAAGCTG	GCTGCCCAGGAGCGAGGACC
ADAMTS9_-_64673627.23-P1P2	ADAMTS9	CCACCTTGTTGGCGCATAATGCCCAGCGAGCGTTTAAGAGCTAAGCTG	GCGCATAATGCCCAGCGAGC
ADAMTSL1_+_18474201.23-P1P2	ADAMTSL1	CCACCTTGTTGGTCCTTGCCGGAATCAGAATGTTTAAGAGCTAAGCTG	GTCCTTGCCGGAATCAGAAT
ADAMTSL1_-_18474157.23-P1P2	ADAMTSL1	CCACCTTGTTGGGGAGTGTTAGCACCAGTACGTTTAAGAGCTAAGCTG	GGGAGTGTTAGCACCAGTAC
ADAMTSL1_+_18474148.23-P1P2	ADAMTSL1	CCACCTTGTTGGCTGCTGTCACATCCAGTACGTTTAAGAGCTAAGCTG	GCTGCTGTCACATCCAGTAC
ADAMTSL1_-_18474595.23-P1P2	ADAMTSL1	CCACCTTGTTGGGAGCTGAGGACTGTATATAGTTTAAGAGCTAAGCTG	GGAGCTGAGGACTGTATATA
ADAMTSL1_+_18474327.23-P1P2	ADAMTSL1	CCACCTTGTTGGCAACAGCACCCAGACTCAAGTTTAAGAGCTAAGCTG	GCAACAGCACCCAGACTCAA
ADAMTSL3_-_84323067.23-P1P2	ADAMTSL3	CCACCTTGTTGGGCGCAGGGCGGCCCCTCAGGTTTAAGAGCTAAGCTG	GGCGCAGGGCGGCCCCTCAG
ADAMTSL3_+_84322918.23-P1P2	ADAMTSL3	CCACCTTGTTGGCAACACCTCGTGCGGAATCGTTTAAGAGCTAAGCTG	GCAACACCTCGTGCGGAATC
ADAMTSL3_-_84322944.23-P1P2	ADAMTSL3	CCACCTTGTTGGTTCCGCACGAGGTGTTGACGTTTAAGAGCTAAGCTG	GTTCCGCACGAGGTGTTGAC
ADAMTSL3_-_84322947.23-P1P2	ADAMTSL3	CCACCTTGTTGGCGCACGAGGTGTTGACGGGGTTTAAGAGCTAAGCTG	GCGCACGAGGTGTTGACGGG
ADAMTSL3_-_84323104.23-P1P2	ADAMTSL3	CCACCTTGTTGGCCCCAGAGGGAGTAAGACTGTTTAAGAGCTAAGCTG	GCCCCAGAGGGAGTAAGACT
ADAMTSL4_+_150522285.23-P1P2	ADAMTSL4	CCACCTTGTTGGGAGCACCCTCCTAGAGAGAGTTTAAGAGCTAAGCTG	GGAGCACCCTCCTAGAGAGA
ADAMTSL4_-_150521934.23-P1P2	ADAMTSL4	CCACCTTGTTGGTTGCCTGGAGAGAGCGCCTGTTTAAGAGCTAAGCTG	GTTGCCTGGAGAGAGCGCCT
ADAMTSL4_+_150521916.23-P1P2	ADAMTSL4	CCACCTTGTTGGGCGCCCAGGCGCTCTCTCCGTTTAAGAGCTAAGCTG	GGCGCCCAGGCGCTCTCTCC
ADAMTSL4_+_150521953.23-P1P2	ADAMTSL4	CCACCTTGTTGGCTGCTCTGCGAGCCCCCGGGTTTAAGAGCTAAGCTG	GCTGCTCTGCGAGCCCCCGG
ADAMTSL4_+_150521897.23-P1P2	ADAMTSL4	CCACCTTGTTGGAGGCAACCTCGCTCCGCGGGTTTAAGAGCTAAGCTG	GAGGCAACCTCGCTCCGCGG
ADCYAP1R1_+_31092317.23-P1P2	ADCYAP1R1	CCACCTTGTTGGAGACGGCCGAGGCGTGGAGGTTTAAGAGCTAAGCTG	GAGACGGCCGAGGCGTGGAG
ADCYAP1R1_+_31092380.23-P1P2	ADCYAP1R1	CCACCTTGTTGGAGACCGCCAAGCCAGAGGAGTTTAAGAGCTAAGCTG	GAGACCGCCAAGCCAGAGGA
ADCYAP1R1_+_31092343.23-P1P2	ADCYAP1R1	CCACCTTGTTGGCTGGGCGAAGGTTCTGGAGGTTTAAGAGCTAAGCTG	GCTGGGCGAAGGTTCTGGAG
ADCYAP1R1_-_31092299.23-P1P2	ADCYAP1R1	CCACCTTGTTGGCCCCGCAGTGAGCAGGTAAGTTTAAGAGCTAAGCTG	GCCCCGCAGTGAGCAGGTAA
ADCYAP1R1_+_31092421.23-P1P2	ADCYAP1R1	CCACCTTGTTGGGCCCTCGCCCGCTCTCCGTGTTTAAGAGCTAAGCTG	GGCCCTCGCCCGCTCTCCGT
AGER_-_32151597.23-P1P2	AGER	CCACCTTGTTGGACTGTGAGGCAGAGTGACGGTTTAAGAGCTAAGCTG	GACTGTGAGGCAGAGTGACG
AGER_+_32151761.23-P1P2	AGER	CCACCTTGTTGGCCATGGTGCTATCTCCCAGGTTTAAGAGCTAAGCTG	GCCATGGTGCTATCTCCCAG
AGER_+_32151976.23-P1P2	AGER	CCACCTTGTTGGTGGCTGCCGGAACAGCAGTGTTTAAGAGCTAAGCTG	GTGGCTGCCGGAACAGCAGT
AGER_+_32151968.23-P1P2	AGER	CCACCTTGTTGGGGAACAGCAGTTGGAGCCTGTTTAAGAGCTAAGCTG	GGGAACAGCAGTTGGAGCCT
AGER_+_32152038.23-P1P2	AGER	CCACCTTGTTGGTAGGGCGGAGGCCACAGCAGTTTAAGAGCTAAGCTG	GTAGGGCGGAGGCCACAGCA
AGRN_+_955534.23-P1P2	AGRN	CCACCTTGTTGGCCATGGCGCAGGCGAGAGGGTTTAAGAGCTAAGCTG	GCCATGGCGCAGGCGAGAGG
AGRN_+_955469.23-P1P2	AGRN	CCACCTTGTTGGcgggacgCAGCTCCGGAggGTTTAAGAGCTAAGCTG	GcgggacgCAGCTCCGGAgg
AGRN_+_955594.23-P1P2	AGRN	CCACCTTGTTGGACGCGGCCACCACAAGGAGGTTTAAGAGCTAAGCTG	GACGCGGCCACCACAAGGAG
AGRN_+_955472.23-P1P2	AGRN	CCACCTTGTTGGggacgggacgCAGCTCCGGGTTTAAGAGCTAAGCTG	GggacgggacgCAGCTCCGG
AGRN_-_955702.23-P1P2	AGRN	CCACCTTGTTGGAACGTGGTGCTCACCGGGAGTTTAAGAGCTAAGCTG	GAACGTGGTGCTCACCGGGA
AKT1_+_105262020.23-P1P2	AKT1	CCACCTTGTTGGCGCAGCGCGGCCCGAAGACGTTTAAGAGCTAAGCTG	GCGCAGCGCGGCCCGAAGAC
AKT1_+_105262011.23-P1P2	AKT1	CCACCTTGTTGGGCCCGAAGACGGGAGCAGGGTTTAAGAGCTAAGCTG	GGCCCGAAGACGGGAGCAGG
AKT1_+_105261705.23-P1P2	AKT1	CCACCTTGTTGGcgcggcgccgccAGAATggGTTTAAGAGCTAAGCTG	GcgcggcgccgccAGAATgg
AKT1_+_105261975.23-P1P2	AKT1	CCACCTTGTTGGCTGGGCACCGGGCACCGAGGTTTAAGAGCTAAGCTG	GCTGGGCACCGGGCACCGAG
AKT1_+_105261633.23-P1P2	AKT1	CCACCTTGTTGGgcgcgggcccggccaagggGTTTAAGAGCTAAGCTG	Ggcgcgggcccggccaaggg
AKT2_+_40791298.23-P1P2	AKT2	CCACCTTGTTGGGTATTTCCGTCCAgagggtGTTTAAGAGCTAAGCTG	GGTATTTCCGTCCAgagggt
AKT2_-_40791096.23-P1P2	AKT2	CCACCTTGTTGGTGGCGCACTCACCTGTCACGTTTAAGAGCTAAGCTG	GTGGCGCACTCACCTGTCAC
AKT2_-_40791241.23-P1P2	AKT2	CCACCTTGTTGGTCCTCCGAGGCAGGCCCAAGTTTAAGAGCTAAGCTG	GTCCTCCGAGGCAGGCCCAA
AKT2_-_40791188.23-P1P2	AKT2	CCACCTTGTTGGTGTTTCCcggcagcggcaaGTTTAAGAGCTAAGCTG	GTGTTTCCcggcagcggcaa
AKT2_+_40791162.23-P1P2	AKT2	CCACCTTGTTGGgccgctgccgGGAAACACAGTTTAAGAGCTAAGCTG	GgccgctgccgGGAAACACA
AKT3_+_244013158.23-P1P2	AKT3	CCACCTTGTTGGGCGGGGGCTGGGTCACCGGGTTTAAGAGCTAAGCTG	GGCGGGGGCTGGGTCACCGG
AKT3_-_244013352.23-P1P2	AKT3	CCACCTTGTTGGtggctgttacctgcaacggGTTTAAGAGCTAAGCTG	Gtggctgttacctgcaacgg
AKT3_-_244013349.23-P1P2	AKT3	CCACCTTGTTGGcggtggctgttacctgcaaGTTTAAGAGCTAAGCTG	Gcggtggctgttacctgcaa
AKT3_-_244013164.23-P1P2	AKT3	CCACCTTGTTGGCACCCACACCCGAAGCCTCGTTTAAGAGCTAAGCTG	GCACCCACACCCGAAGCCTC
AKT3_-_244013548.23-P1P2	AKT3	CCACCTTGTTGGgggcaagcgaagggctgcaGTTTAAGAGCTAAGCTG	Ggggcaagcgaagggctgca
ALCAM_+_105086147.23-P1P2	ALCAM	CCACCTTGTTGGCTGGCGGGTCCCGACGCAGGTTTAAGAGCTAAGCTG	GCTGGCGGGTCCCGACGCAG
ALCAM_+_105085800.23-P1P2	ALCAM	CCACCTTGTTGGggcggcgggtctcctcaggGTTTAAGAGCTAAGCTG	Gggcggcgggtctcctcagg
ALCAM_+_105085743.23-P1P2	ALCAM	CCACCTTGTTGGTCCGGGCTGCTCTGAGTAGGTTTAAGAGCTAAGCTG	GTCCGGGCTGCTCTGAGTAG
ALCAM_+_105085737.23-P1P2	ALCAM	CCACCTTGTTGGCTGCTCTGAGTAGAGGGACGTTTAAGAGCTAAGCTG	GCTGCTCTGAGTAGAGGGAC
ALCAM_-_105086158.23-P1P2	ALCAM	CCACCTTGTTGGGAAGACGCTGCCCCTGCGTGTTTAAGAGCTAAGCTG	GGAAGACGCTGCCCCTGCGT
ALK_+_30144436.23-P1P2	ALK	CCACCTTGTTGGCCAGGCAGATGCGATCCAGGTTTAAGAGCTAAGCTG	GCCAGGCAGATGCGATCCAG
ALK_-_30144392.23-P1P2	ALK	CCACCTTGTTGGCCCGCGACCCTCCGAACAGGTTTAAGAGCTAAGCTG	GCCCGCGACCCTCCGAACAG
ALK_-_30144395.23-P1P2	ALK	CCACCTTGTTGGGCGACCCTCCGAACAGAGGGTTTAAGAGCTAAGCTG	GGCGACCCTCCGAACAGAGG
ALK_-_30144402.23-P1P2	ALK	CCACCTTGTTGGTCCGAACAGAGGCGGCGGGGTTTAAGAGCTAAGCTG	GTCCGAACAGAGGCGGCGGG
ALK_-_30144068.23-P1P2	ALK	CCACCTTGTTGGCGGTCTGGGCGGGAACCGAGTTTAAGAGCTAAGCTG	GCGGTCTGGGCGGGAACCGA
ALPI_+_233321300.23-P1P2	ALPI	CCACCTTGTTGGTCCTGGTGGCTGTCACCGTGTTTAAGAGCTAAGCTG	GTCCTGGTGGCTGTCACCGT
ALPI_-_233321239.23-P1P2	ALPI	CCACCTTGTTGGCGGCACCCGGGACCTTCAGGTTTAAGAGCTAAGCTG	GCGGCACCCGGGACCTTCAG
ALPI_+_233320899.23-P1P2	ALPI	CCACCTTGTTGGGGGCCCCTGCATGTCTTGGGTTTAAGAGCTAAGCTG	GGGGCCCCTGCATGTCTTGG
ALPI_-_233320917.23-P1P2	ALPI	CCACCTTGTTGGCTGCCCCCAAGACATGCAGGTTTAAGAGCTAAGCTG	GCTGCCCCCAAGACATGCAG
ALPI_+_233320902.23-P1P2	ALPI	CCACCTTGTTGGCCAGGGCCCCTGCATGTCTGTTTAAGAGCTAAGCTG	GCCAGGGCCCCTGCATGTCT
ALPL_+_21835978.23-P1	ALPL	CCACCTTGTTGGCACTGGCGAGGGTCCGTCCGTTTAAGAGCTAAGCTG	GCACTGGCGAGGGTCCGTCC
ALPL_+_21836361.23-P1	ALPL	CCACCTTGTTGGCTCAGTCACGGGGCACCAAGTTTAAGAGCTAAGCTG	GCTCAGTCACGGGGCACCAA
ALPL_+_21835943.23-P1	ALPL	CCACCTTGTTGGGAGCACGGAGCCAGGATAGGTTTAAGAGCTAAGCTG	GGAGCACGGAGCCAGGATAG
ALPL_+_21835964.23-P1	ALPL	CCACCTTGTTGGCGTCCAGGCACAAGCGCGTGTTTAAGAGCTAAGCTG	GCGTCCAGGCACAAGCGCGT
ALPL_-_21836424.23-P1	ALPL	CCACCTTGTTGGGCCGTAGCTCTAGAGACCTGTTTAAGAGCTAAGCTG	GGCCGTAGCTCTAGAGACCT
ALPL_-_21877787.23-P2	ALPL	CCACCTTGTTGGcacttagaaactcccggtgGTTTAAGAGCTAAGCTG	Gcacttagaaactcccggtg
ALPL_+_21878169.23-P2	ALPL	CCACCTTGTTGGGCCAGAAGTGACGGCTCTGGTTTAAGAGCTAAGCTG	GGCCAGAAGTGACGGCTCTG
ALPL_+_21877779.23-P2	ALPL	CCACCTTGTTGGgccatctcagctgccacacGTTTAAGAGCTAAGCTG	Ggccatctcagctgccacac
ALPL_-_21877871.23-P2	ALPL	CCACCTTGTTGGgaggtggcatgaagctcagGTTTAAGAGCTAAGCTG	Ggaggtggcatgaagctcag
ALPL_-_21877856.23-P2	ALPL	CCACCTTGTTGGgtacatgcgatgtttgaggGTTTAAGAGCTAAGCTG	Ggtacatgcgatgtttgagg
ALPP_+_233243502.23-P1P2	ALPP	CCACCTTGTTGGGGGCCCCAGCATGTCTGGAGTTTAAGAGCTAAGCTG	GGGGCCCCAGCATGTCTGGA
ALPP_+_233243871.23-P1P2	ALPP	CCACCTTGTTGGGTGTGAGGCTTGGGCCCCAGTTTAAGAGCTAAGCTG	GGTGTGAGGCTTGGGCCCCA
ALPP_+_233243879.23-P1P2	ALPP	CCACCTTGTTGGACAGAAATGTGTGAGGCTTGTTTAAGAGCTAAGCTG	GACAGAAATGTGTGAGGCTT
ALPP_+_233243599.23-P1P2	ALPP	CCACCTTGTTGGGTTGTGTAGGGGCAGCTCGGTTTAAGAGCTAAGCTG	GGTTGTGTAGGGGCAGCTCG
ALPP_+_233243506.23-P1P2	ALPP	CCACCTTGTTGGTGCAGGGCCCCAGCATGTCGTTTAAGAGCTAAGCTG	GTGCAGGGCCCCAGCATGTC
ALPPL2_+_233271588.23-P1P2	ALPPL2	CCACCTTGTTGGCTGCATGTCTGGAAGCAGTGTTTAAGAGCTAAGCTG	GCTGCATGTCTGGAAGCAGT
ALPPL2_+_233271581.23-P1P2	ALPPL2	CCACCTTGTTGGTCTGGAAGCAGTCGGAGAGGTTTAAGAGCTAAGCTG	GTCTGGAAGCAGTCGGAGAG
ALPPL2_+_233271563.23-P1P2	ALPPL2	CCACCTTGTTGGGCGGCGAGGCGGAAATCCCGTTTAAGAGCTAAGCTG	GGCGGCGAGGCGGAAATCCC
ALPPL2_+_233271948.23-P1P2	ALPPL2	CCACCTTGTTGGTTGCTCCCCAGGGCTGTCCGTTTAAGAGCTAAGCTG	GTTGCTCCCCAGGGCTGTCC
ALPPL2_-_233271568.23-P1P2	ALPPL2	CCACCTTGTTGGCAGCTCATACTCCATACCTGTTTAAGAGCTAAGCTG	GCAGCTCATACTCCATACCT
AMBN_+_71458058.23-P1P2	AMBN	CCACCTTGTTGGGACATGCACTGTGCTCTCAGTTTAAGAGCTAAGCTG	GGACATGCACTGTGCTCTCA
AMBN_+_71457964.23-P1P2	AMBN	CCACCTTGTTGGGCTCTGTACTTCTCATTCAGTTTAAGAGCTAAGCTG	GGCTCTGTACTTCTCATTCA
AMBN_+_71458228.23-P1P2	AMBN	CCACCTTGTTGGTGTTAGGCATGTCATCTCTGTTTAAGAGCTAAGCTG	GTGTTAGGCATGTCATCTCT
AMBN_+_71458216.23-P1P2	AMBN	CCACCTTGTTGGCATCTCTGGGACATGCTAAGTTTAAGAGCTAAGCTG	GCATCTCTGGGACATGCTAA
AMBN_-_71458090.23-P1P2	AMBN	CCACCTTGTTGGCAGTGCATGTCAGCATCTAGTTTAAGAGCTAAGCTG	GCAGTGCATGTCAGCATCTA
AMELX_-_11311536.23-P1P2	AMELX	CCACCTTGTTGGATAGTTGGAAGAAATCTAAGTTTAAGAGCTAAGCTG	GATAGTTGGAAGAAATCTAA
AMELX_+_11311546.23-P1P2	AMELX	CCACCTTGTTGGAGTTTCTGTTTGAAACTCAGTTTAAGAGCTAAGCTG	GAGTTTCTGTTTGAAACTCA
AMELX_-_11311877.23-P1P2	AMELX	CCACCTTGTTGGGTAAAAATAATACATTCACGTTTAAGAGCTAAGCTG	GGTAAAAATAATACATTCAC
AMELX_-_11311809.23-P1P2	AMELX	CCACCTTGTTGGTAATTCCAAAGGTCTTTCTGTTTAAGAGCTAAGCTG	GTAATTCCAAAGGTCTTTCT
AMELX_+_11311720.23-P1P2	AMELX	CCACCTTGTTGGCAGAGTCTAATTTAATTATGTTTAAGAGCTAAGCTG	GCAGAGTCTAATTTAATTAT
AMELY_+_6742063.23-P1P2	AMELY	CCACCTTGTTGGATAGTTAAAGAAAATCTAGGTTTAAGAGCTAAGCTG	GATAGTTAAAGAAAATCTAG
AMELY_-_6742053.23-P1P2	AMELY	CCACCTTGTTGGACTTTCTTTGTGCTACACAGTTTAAGAGCTAAGCTG	GACTTTCTTTGTGCTACACA
AMELY_-_6741928.23-P1P2	AMELY	CCACCTTGTTGGGCATAAAGTATTAGAAACAGTTTAAGAGCTAAGCTG	GGCATAAAGTATTAGAAACA
AMELY_+_6741881.23-P1P2	AMELY	CCACCTTGTTGGAAGAATCAGTTACTTCTGTGTTTAAGAGCTAAGCTG	GAAGAATCAGTTACTTCTGT
AMELY_-_6742061.23-P1P2	AMELY	CCACCTTGTTGGTGTGCTACACAGGGAGGCTGTTTAAGAGCTAAGCTG	GTGTGCTACACAGGGAGGCT
AMHR2_-_53818886.23-P1P2	AMHR2	CCACCTTGTTGGAGACGCAAGCTCTCAGGAGGTTTAAGAGCTAAGCTG	GAGACGCAAGCTCTCAGGAG
AMHR2_+_53818923.23-P1P2	AMHR2	CCACCTTGTTGGGACATCAAGGCAAGAATGCGTTTAAGAGCTAAGCTG	GGACATCAAGGCAAGAATGC
AMHR2_+_53819383.23-P1P2	AMHR2	CCACCTTGTTGGAACCTCCAGGAGTGCCCAGGTTTAAGAGCTAAGCTG	GAACCTCCAGGAGTGCCCAG
AMHR2_+_53819137.23-P1P2	AMHR2	CCACCTTGTTGGTGAGAGGTCATGGGAGTCCGTTTAAGAGCTAAGCTG	GTGAGAGGTCATGGGAGTCC
AMHR2_-_53819370.23-P1P2	AMHR2	CCACCTTGTTGGTCTCCCAGGTGCCCCAGGGGTTTAAGAGCTAAGCTG	GTCTCCCAGGTGCCCCAGGG
AMIGO1_-_110051950.23-P1P2	AMIGO1	CCACCTTGTTGGAGCTGAGGGAAGGTCAACAGTTTAAGAGCTAAGCTG	GAGCTGAGGGAAGGTCAACA
AMIGO1_-_110052323.23-P1P2	AMIGO1	CCACCTTGTTGGGGAGGCGCAGCGATCCCAGGTTTAAGAGCTAAGCTG	GGGAGGCGCAGCGATCCCAG
AMIGO1_-_110051890.23-P1P2	AMIGO1	CCACCTTGTTGGGGAGTCACAGGGATGGCACGTTTAAGAGCTAAGCTG	GGGAGTCACAGGGATGGCAC
AMIGO1_-_110052326.23-P1P2	AMIGO1	CCACCTTGTTGGGGCGCAGCGATCCCAGCGGGTTTAAGAGCTAAGCTG	GGGCGCAGCGATCCCAGCGG
AMIGO1_-_110052295.23-P1P2	AMIGO1	CCACCTTGTTGGGGCCTGGCGCGGATCGGTGGTTTAAGAGCTAAGCTG	GGGCCTGGCGCGGATCGGTG
AMIGO2_+_47473290.23-P1P2	AMIGO2	CCACCTTGTTGGGGACGCGCAGACCTTCGGAGTTTAAGAGCTAAGCTG	GGGACGCGCAGACCTTCGGA
AMIGO2_+_47473698.23-P1P2	AMIGO2	CCACCTTGTTGGCAGGAGGCAGGACGCGCAGGTTTAAGAGCTAAGCTG	GCAGGAGGCAGGACGCGCAG
AMIGO2_+_47473318.23-P1P2	AMIGO2	CCACCTTGTTGGGGTGCAAGAGTGACAGACAGTTTAAGAGCTAAGCTG	GGGTGCAAGAGTGACAGACA
AMIGO2_+_47473279.23-P1P2	AMIGO2	CCACCTTGTTGGCCTTCGGAAGGCACTGCGTGTTTAAGAGCTAAGCTG	GCCTTCGGAAGGCACTGCGT
AMIGO2_+_47473349.23-P1P2	AMIGO2	CCACCTTGTTGGCGCCGGGAGCCGGAGGGAAGTTTAAGAGCTAAGCTG	GCGCCGGGAGCCGGAGGGAA
AMIGO3_+_49761355.23-P1	AMIGO3	CCACCTTGTTGGGGGCCAGCAGCCGTCTACCGTTTAAGAGCTAAGCTG	GGGGCCAGCAGCCGTCTACC
AMIGO3_-_49761331.23-P1	AMIGO3	CCACCTTGTTGGCGCCCTGACGCCGGATCCAGTTTAAGAGCTAAGCTG	GCGCCCTGACGCCGGATCCA
AMIGO3_-_49760950.23-P1	AMIGO3	CCACCTTGTTGGGGGCTCAGTCAGAAGGTACGTTTAAGAGCTAAGCTG	GGGGCTCAGTCAGAAGGTAC
AMIGO3_+_49760960.23-P1	AMIGO3	CCACCTTGTTGGAGGGATGGCCAGCGACTAGGTTTAAGAGCTAAGCTG	GAGGGATGGCCAGCGACTAG
AMIGO3_-_49761366.23-P1	AMIGO3	CCACCTTGTTGGGAACGCGACACCGGGTAGAGTTTAAGAGCTAAGCTG	GGAACGCGACACCGGGTAGA
AMIGO3_-_49757052.23-P2	AMIGO3	CCACCTTGTTGGGCCGACGGCCCCTACTCTCGTTTAAGAGCTAAGCTG	GGCCGACGGCCCCTACTCTC
AMIGO3_+_49757093.23-P2	AMIGO3	CCACCTTGTTGGGAGGGCTAGCGAAGCCGAAGTTTAAGAGCTAAGCTG	GGAGGGCTAGCGAAGCCGAA
AMIGO3_-_49757076.23-P2	AMIGO3	CCACCTTGTTGGCCCAGGTTGTGAGGCGGTGGTTTAAGAGCTAAGCTG	GCCCAGGTTGTGAGGCGGTG
AMIGO3_+_49757040.23-P2	AMIGO3	CCACCTTGTTGGACCTGGGAACCGGAGAGTAGTTTAAGAGCTAAGCTG	GACCTGGGAACCGGAGAGTA
AMIGO3_-_49756732.23-P2	AMIGO3	CCACCTTGTTGGTAGCGGCAGGTAACTCGGCGTTTAAGAGCTAAGCTG	GTAGCGGCAGGTAACTCGGC
AMN_-_103389029.23-P1	AMN	CCACCTTGTTGGCAAGGAGCCGAGGCGAGATGTTTAAGAGCTAAGCTG	GCAAGGAGCCGAGGCGAGAT
AMN_+_103389039.23-P1	AMN	CCACCTTGTTGGCTGCAGCCACAGCAGGACCGTTTAAGAGCTAAGCTG	GCTGCAGCCACAGCAGGACC
AMN_-_103389087.23-P1	AMN	CCACCTTGTTGGCGGTGAGCCGGGACCACACGTTTAAGAGCTAAGCTG	GCGGTGAGCCGGGACCACAC
AMN_+_103389216.23-P1	AMN	CCACCTTGTTGGCGCACTCGCCAGACGAGGGGTTTAAGAGCTAAGCTG	GCGCACTCGCCAGACGAGGG
AMN_-_103389054.23-P1	AMN	CCACCTTGTTGGCCTGGGCCGGGTCCTGCTGGTTTAAGAGCTAAGCTG	GCCTGGGCCGGGTCCTGCTG
AMN_+_103395419.23-P2	AMN	CCACCTTGTTGGCCCCACCGGAGCCAGCCCGGTTTAAGAGCTAAGCTG	GCCCCACCGGAGCCAGCCCG
AMN_+_103395231.23-P2	AMN	CCACCTTGTTGGCGCGGAAGGAGGCACTAGGGTTTAAGAGCTAAGCTG	GCGCGGAAGGAGGCACTAGG
AMN_+_103395370.23-P2	AMN	CCACCTTGTTGGCAACGTGTGCAGACCAGGAGTTTAAGAGCTAAGCTG	GCAACGTGTGCAGACCAGGA
AMN_-_103395024.23-P2	AMN	CCACCTTGTTGGGAGGTCGTGCTCAGACgcgGTTTAAGAGCTAAGCTG	GGAGGTCGTGCTCAGACgcg
AMN_-_103395326.23-P2	AMN	CCACCTTGTTGGGGGCCGGGTGAGCACTGAGGTTTAAGAGCTAAGCTG	GGGGCCGGGTGAGCACTGAG
AMY2A_+_104159553.23-P1P2	AMY2A	CCACCTTGTTGGCCAACCCTGACAGACTGACGTTTAAGAGCTAAGCTG	GCCAACCCTGACAGACTGAC
AMY2A_+_104159726.23-P1P2	AMY2A	CCACCTTGTTGGTCTCTTTAAAGATCCAGAAGTTTAAGAGCTAAGCTG	GTCTCTTTAAAGATCCAGAA
AMY2A_+_104159834.23-P1P2	AMY2A	CCACCTTGTTGGTAATGTTTTTCTTAGGTTCGTTTAAGAGCTAAGCTG	GTAATGTTTTTCTTAGGTTC
AMY2A_-_104159817.23-P1P2	AMY2A	CCACCTTGTTGGAGCAACAGGTCACTGTTTAGTTTAAGAGCTAAGCTG	GAGCAACAGGTCACTGTTTA
AMY2A_-_104159734.23-P1P2	AMY2A	CCACCTTGTTGGGTTTTTTTGTATGCCATTCGTTTAAGAGCTAAGCTG	GGTTTTTTTGTATGCCATTC
ANG_+_21152724.23-P1P2	ANG	CCACCTTGTTGGTGTACACGGACGGAGATGGGTTTAAGAGCTAAGCTG	GTGTACACGGACGGAGATGG
ANG_+_21152942.23-P1P2	ANG	CCACCTTGTTGGTATGAAGCTACCAGAGAGGGTTTAAGAGCTAAGCTG	GTATGAAGCTACCAGAGAGG
ANG_+_21153194.23-P1P2	ANG	CCACCTTGTTGGGCCTCCTAGGGCTTCCCTTGTTTAAGAGCTAAGCTG	GGCCTCCTAGGGCTTCCCTT
ANG_-_21153211.23-P1P2	ANG	CCACCTTGTTGGCGAACCTAAGGGAAGCCCTGTTTAAGAGCTAAGCTG	GCGAACCTAAGGGAAGCCCT
ANG_-_21153201.23-P1P2	ANG	CCACCTTGTTGGACAGAATCGCCGAACCTAAGTTTAAGAGCTAAGCTG	GACAGAATCGCCGAACCTAA
ANTXR1_+_69240562.23-P1P2	ANTXR1	CCACCTTGTTGGGAACTCGCCACGACCCTCAGTTTAAGAGCTAAGCTG	GGAACTCGCCACGACCCTCA
ANTXR1_+_69240935.23-P1P2	ANTXR1	CCACCTTGTTGGGAGGAGCGCGCCCCAACAAGTTTAAGAGCTAAGCTG	GGAGGAGCGCGCCCCAACAA
ANTXR1_-_69240675.23-P1P2	ANTXR1	CCACCTTGTTGGCCTCGGCATCGGCTTCCAGGTTTAAGAGCTAAGCTG	GCCTCGGCATCGGCTTCCAG
ANTXR1_-_69240719.23-P1P2	ANTXR1	CCACCTTGTTGGTCATCTGCGCCGGGCAAGGGTTTAAGAGCTAAGCTG	GTCATCTGCGCCGGGCAAGG
ANTXR1_+_69240686.23-P1P2	ANTXR1	CCACCTTGTTGGGCGCAGATGAGCACCAGAGGTTTAAGAGCTAAGCTG	GGCGCAGATGAGCACCAGAG
ANTXR2_-_80994347.23-P1P2	ANTXR2	CCACCTTGTTGGTGGAGAGAAGCCACGCCGAGTTTAAGAGCTAAGCTG	GTGGAGAGAAGCCACGCCGA
ANTXR2_+_80993930.23-P1P2	ANTXR2	CCACCTTGTTGGGATTCGTCAAGAGTTCCGGGTTTAAGAGCTAAGCTG	GGATTCGTCAAGAGTTCCGG
ANTXR2_-_80994189.23-P1P2	ANTXR2	CCACCTTGTTGGGGCGACGGCAGAACAAACTGTTTAAGAGCTAAGCTG	GGGCGACGGCAGAACAAACT
ANTXR2_-_80994328.23-P1P2	ANTXR2	CCACCTTGTTGGTGGCCCTGGGACTCCCGGCGTTTAAGAGCTAAGCTG	GTGGCCCTGGGACTCCCGGC
ANTXR2_-_80993779.23-P1P2	ANTXR2	CCACCTTGTTGGAAGCTCAGGAGGGTCGCAAGTTTAAGAGCTAAGCTG	GAAGCTCAGGAGGGTCGCAA
AOC1_-_150549631.23-P1	AOC1	CCACCTTGTTGGGCTGGAAGCAGAGCGAACTGTTTAAGAGCTAAGCTG	GGCTGGAAGCAGAGCGAACT
AOC1_-_150549683.23-P1	AOC1	CCACCTTGTTGGATTCGGGAGAGTCAAGAAGGTTTAAGAGCTAAGCTG	GATTCGGGAGAGTCAAGAAG
AOC1_-_150549660.23-P1	AOC1	CCACCTTGTTGGCACACAGGTGCGTTCTGATGTTTAAGAGCTAAGCTG	GCACACAGGTGCGTTCTGAT
AOC1_-_150550032.23-P1	AOC1	CCACCTTGTTGGAAAGAAACGTGGGTATAAGGTTTAAGAGCTAAGCTG	GAAAGAAACGTGGGTATAAG
AOC1_-_150549732.23-P1	AOC1	CCACCTTGTTGGAAGGAGGGCACAGAGTGAGGTTTAAGAGCTAAGCTG	GAAGGAGGGCACAGAGTGAG
AOC1_+_150553853.23-P2	AOC1	CCACCTTGTTGGTGGTCACCAAAGAAGATGAGTTTAAGAGCTAAGCTG	GTGGTCACCAAAGAAGATGA
AOC1_+_150554088.23-P2	AOC1	CCACCTTGTTGGGAAGGCCAGGCATCTGTCAGTTTAAGAGCTAAGCTG	GGAAGGCCAGGCATCTGTCA
AOC1_+_150553698.23-P2	AOC1	CCACCTTGTTGGCAGCTCCTTCTTGGACCAGGTTTAAGAGCTAAGCTG	GCAGCTCCTTCTTGGACCAG
AOC1_-_150553650.23-P2	AOC1	CCACCTTGTTGGGACTCTGCCCAGGAAGGCAGTTTAAGAGCTAAGCTG	GGACTCTGCCCAGGAAGGCA
AOC1_-_150554129.23-P2	AOC1	CCACCTTGTTGGTCACCGATGTGGCCCCCCGGTTTAAGAGCTAAGCTG	GTCACCGATGTGGCCCCCCG
AOC2_+_40996638.23-P1P2	AOC2	CCACCTTGTTGGACTATCTTGAGATGCATGGGTTTAAGAGCTAAGCTG	GACTATCTTGAGATGCATGG
AOC2_+_40997007.23-P1P2	AOC2	CCACCTTGTTGGTGTCCACCAAAGAGGACGAGTTTAAGAGCTAAGCTG	GTGTCCACCAAAGAGGACGA
AOC2_-_40996949.23-P1P2	AOC2	CCACCTTGTTGGGAGCTGCAGCTGCCCCCCAGTTTAAGAGCTAAGCTG	GGAGCTGCAGCTGCCCCCCA
AOC2_+_40996680.23-P1P2	AOC2	CCACCTTGTTGGAGGGCAAAGATGGTAATGAGTTTAAGAGCTAAGCTG	GAGGGCAAAGATGGTAATGA
AOC2_+_40997074.23-P1P2	AOC2	CCACCTTGTTGGCACATCCCGCATGTACGAGGTTTAAGAGCTAAGCTG	GCACATCCCGCATGTACGAG
APCDD1_+_10454664.23-P1P2	APCDD1	CCACCTTGTTGGGCGCCGCTCTGAGCTGCAGGTTTAAGAGCTAAGCTG	GGCGCCGCTCTGAGCTGCAG
APCDD1_-_10454694.23-P1P2	APCDD1	CCACCTTGTTGGCTCAGAGCGGCGCACgcggGTTTAAGAGCTAAGCTG	GCTCAGAGCGGCGCACgcgg
APCDD1_+_10455021.23-P1P2	APCDD1	CCACCTTGTTGGAACTCACCGTGAAGCAGGAGTTTAAGAGCTAAGCTG	GAACTCACCGTGAAGCAGGA
APCDD1_-_10455126.23-P1P2	APCDD1	CCACCTTGTTGGAGGCGTCGGGTCTGGATCGGTTTAAGAGCTAAGCTG	GAGGCGTCGGGTCTGGATCG
APCDD1_-_10455050.23-P1P2	APCDD1	CCACCTTGTTGGCTTCACGGTGAGTTCCCGAGTTTAAGAGCTAAGCTG	GCTTCACGGTGAGTTCCCGA
APCDD1L_-_57089971.23-P1P2	APCDD1L	CCACCTTGTTGGAGCGGAGCTGCGCACTCATGTTTAAGAGCTAAGCTG	GAGCGGAGCTGCGCACTCAT
APCDD1L_-_57090166.23-P1P2	APCDD1L	CCACCTTGTTGGCAAGCTCTGGTCCCGGCCAGTTTAAGAGCTAAGCTG	GCAAGCTCTGGTCCCGGCCA
APCDD1L_+_57090000.23-P1P2	APCDD1L	CCACCTTGTTGGGGTGTGCGCGCCTCGCCGGGTTTAAGAGCTAAGCTG	GGGTGTGCGCGCCTCGCCGG
APCDD1L_+_57090390.23-P1P2	APCDD1L	CCACCTTGTTGGCGGCCTCATTTACAGACAGGTTTAAGAGCTAAGCTG	GCGGCCTCATTTACAGACAG
APCDD1L_+_57090384.23-P1P2	APCDD1L	CCACCTTGTTGGCATTTACAGACAGAGGCCGGTTTAAGAGCTAAGCTG	GCATTTACAGACAGAGGCCG
APLP1_+_36359911.23-P1P2	APLP1	CCACCTTGTTGGGCTGGACTTCTGGGACCAGGTTTAAGAGCTAAGCTG	GGCTGGACTTCTGGGACCAG
APLP1_-_36359489.23-P1P2	APLP1	CCACCTTGTTGGGGAGCTCCTGTCACCGCTGGTTTAAGAGCTAAGCTG	GGGAGCTCCTGTCACCGCTG
APLP1_+_36359871.23-P1P2	APLP1	CCACCTTGTTGGCTATGCTCGAGATGGGAGGGTTTAAGAGCTAAGCTG	GCTATGCTCGAGATGGGAGG
APLP1_-_36359530.23-P1P2	APLP1	CCACCTTGTTGGAGGGGACGTGAGGGCGCAAGTTTAAGAGCTAAGCTG	GAGGGGACGTGAGGGCGCAA
APLP1_-_36359512.23-P1P2	APLP1	CCACCTTGTTGGCGGGCCGGGCGGGAGTGCAGTTTAAGAGCTAAGCTG	GCGGGCCGGGCGGGAGTGCA
APLP2_-_129939865.23-P1P2	APLP2	CCACCTTGTTGGGCCGCGCGCTAGAGCGACCGTTTAAGAGCTAAGCTG	GGCCGCGCGCTAGAGCGACC
APLP2_-_129939875.23-P1P2	APLP2	CCACCTTGTTGGAGAGCGACCCGGCGAGGGAGTTTAAGAGCTAAGCTG	GAGAGCGACCCGGCGAGGGA
APLP2_+_129940269.23-P1P2	APLP2	CCACCTTGTTGGggcACTGGGTCCCCGGAGGGTTTAAGAGCTAAGCTG	GggcACTGGGTCCCCGGAGG
APLP2_-_129940207.23-P1P2	APLP2	CCACCTTGTTGGGGCCAAATGAAAGGCGTCGGTTTAAGAGCTAAGCTG	GGGCCAAATGAAAGGCGTCG
APLP2_+_129939845.23-P1P2	APLP2	CCACCTTGTTGGGCCGGGTCGCTCTAGCGCGGTTTAAGAGCTAAGCTG	GGCCGGGTCGCTCTAGCGCG
APOO_-_23925881.23-P1P2	APOO	CCACCTTGTTGGGGCCACGCCCACTATAGAGGTTTAAGAGCTAAGCTG	GGGCCACGCCCACTATAGAG
APOO_+_23925598.23-P1P2	APOO	CCACCTTGTTGGAGGCGGGAGACCCCCGGGTGTTTAAGAGCTAAGCTG	GAGGCGGGAGACCCCCGGGT
APOO_+_23925989.23-P1P2	APOO	CCACCTTGTTGGCGACGCGGCTTCTAGAACCGTTTAAGAGCTAAGCTG	GCGACGCGGCTTCTAGAACC
APOO_-_23925841.23-P1P2	APOO	CCACCTTGTTGGTCGCTGGCAGCGGAGGCTCGTTTAAGAGCTAAGCTG	GTCGCTGGCAGCGGAGGCTC
APOO_-_23925835.23-P1P2	APOO	CCACCTTGTTGGAACATGTCGCTGGCAGCGGGTTTAAGAGCTAAGCTG	GAACATGTCGCTGGCAGCGG
APP_+_27543048.23-P1P2	APP	CCACCTTGTTGGGGTAGGCGAGAGCACGCGGGTTTAAGAGCTAAGCTG	GGGTAGGCGAGAGCACGCGG
APP_-_27542651.23-P1P2	APP	CCACCTTGTTGGCCGGGCTGGCGCGGAACCAGTTTAAGAGCTAAGCTG	GCCGGGCTGGCGCGGAACCA
APP_+_27543051.23-P1P2	APP	CCACCTTGTTGGAGCGGTAGGCGAGAGCACGGTTTAAGAGCTAAGCTG	GAGCGGTAGGCGAGAGCACG
APP_-_27542705.23-P1P2	APP	CCACCTTGTTGGGCCGGAGCGCGACTCCCTGGTTTAAGAGCTAAGCTG	GGCCGGAGCGCGACTCCCTG
APP_+_27543064.23-P1P2	APP	CCACCTTGTTGGCAGTTTCCTCGGCAGCGGTGTTTAAGAGCTAAGCTG	GCAGTTTCCTCGGCAGCGGT
ARAF_-_47420629.23-P1P2	ARAF	CCACCTTGTTGGAGGCCCAAGATGGAGACGGGTTTAAGAGCTAAGCTG	GAGGCCCAAGATGGAGACGG
ARAF_+_47420611.23-P1P2	ARAF	CCACCTTGTTGGCCGCCGCCGTCTCCATCTTGTTTAAGAGCTAAGCTG	GCCGCCGCCGTCTCCATCTT
ARAF_-_47420655.23-P1P2	ARAF	CCACCTTGTTGGTGTAGCGGCGTGACAGGTGGTTTAAGAGCTAAGCTG	GTGTAGCGGCGTGACAGGTG
ARAF_-_47420581.23-P1P2	ARAF	CCACCTTGTTGGAGAGTCCGAGAGGCGACGGGTTTAAGAGCTAAGCTG	GAGAGTCCGAGAGGCGACGG
ARAF_-_47420650.23-P1P2	ARAF	CCACCTTGTTGGGCGGCTGTAGCGGCGTGACGTTTAAGAGCTAAGCTG	GGCGGCTGTAGCGGCGTGAC
AREG_+_75311479.23-P1P2	AREG	CCACCTTGTTGGTAGACAGAGATGGAGAATTGTTTAAGAGCTAAGCTG	GTAGACAGAGATGGAGAATT
AREG_-_75311544.23-P1P2	AREG	CCACCTTGTTGGAGAGGGACTTAGAGTATCCGTTTAAGAGCTAAGCTG	GAGAGGGACTTAGAGTATCC
AREG_+_75311516.23-P1P2	AREG	CCACCTTGTTGGACTCTAAGTCCCTCTAGGAGTTTAAGAGCTAAGCTG	GACTCTAAGTCCCTCTAGGA
AREG_+_75311472.23-P1P2	AREG	CCACCTTGTTGGAGATGGAGAATTAGGCAGGGTTTAAGAGCTAAGCTG	GAGATGGAGAATTAGGCAGG
AREG_+_75311475.23-P1P2	AREG	CCACCTTGTTGGCAGAGATGGAGAATTAGGCGTTTAAGAGCTAAGCTG	GCAGAGATGGAGAATTAGGC
ART3_-_76995916.23-P1	ART3	CCACCTTGTTGGGCTTACCACAACTGAGAGTGTTTAAGAGCTAAGCTG	GGCTTACCACAACTGAGAGT
ART3_+_76995900.23-P1	ART3	CCACCTTGTTGGGACTCCCCACTCTCAGTTGGTTTAAGAGCTAAGCTG	GGACTCCCCACTCTCAGTTG
ART3_+_76995879.23-P1	ART3	CCACCTTGTTGGGTAAGCAAGTCTTCAGGATGTTTAAGAGCTAAGCTG	GGTAAGCAAGTCTTCAGGAT
ART3_+_76996238.23-P1	ART3	CCACCTTGTTGGATGAGAATGAACAGCACAGGTTTAAGAGCTAAGCTG	GATGAGAATGAACAGCACAG
ART3_+_76995850.23-P1	ART3	CCACCTTGTTGGTGACAGTGAGAGCTGAGACGTTTAAGAGCTAAGCTG	GTGACAGTGAGAGCTGAGAC
ART3_+_76932405.23-P2	ART3	CCACCTTGTTGGTGGCAGCAAACGTACCCAGGTTTAAGAGCTAAGCTG	GTGGCAGCAAACGTACCCAG
ART3_-_76932371.23-P2	ART3	CCACCTTGTTGGTCAGTGAGGAGGTTATACCGTTTAAGAGCTAAGCTG	GTCAGTGAGGAGGTTATACC
ART3_-_76932374.23-P2	ART3	CCACCTTGTTGGGTGAGGAGGTTATACCCGGGTTTAAGAGCTAAGCTG	GGTGAGGAGGTTATACCCGG
ART3_+_76932367.23-P2	ART3	CCACCTTGTTGGAGCGAGCGTCGAGACCTCCGTTTAAGAGCTAAGCTG	GAGCGAGCGTCGAGACCTCC
ART3_-_76932744.23-P2	ART3	CCACCTTGTTGGGGCCCTTCGGATAAGAGAAGTTTAAGAGCTAAGCTG	GGGCCCTTCGGATAAGAGAA
ART4_-_14996007.23-P1P2	ART4	CCACCTTGTTGGTTGCAGGAGGTACAGTAGTGTTTAAGAGCTAAGCTG	GTTGCAGGAGGTACAGTAGT
ART4_-_14996357.23-P1P2	ART4	CCACCTTGTTGGTGATCTAGTCTGTATTCAGGTTTAAGAGCTAAGCTG	GTGATCTAGTCTGTATTCAG
ART4_+_14996362.23-P1P2	ART4	CCACCTTGTTGGCTGACACTTAACAGGACTTGTTTAAGAGCTAAGCTG	GCTGACACTTAACAGGACTT
ART4_-_14995969.23-P1P2	ART4	CCACCTTGTTGGGAATGGCAGCAGGCCTCCAGTTTAAGAGCTAAGCTG	GGAATGGCAGCAGGCCTCCA
ART4_+_14996070.23-P1P2	ART4	CCACCTTGTTGGGATGAAGCTGCAAGGGCAAGTTTAAGAGCTAAGCTG	GGATGAAGCTGCAAGGGCAA
ASPN_+_95244763.23-P1P2	ASPN	CCACCTTGTTGGACTAACATGGACTAATCTGGTTTAAGAGCTAAGCTG	GACTAACATGGACTAATCTG
ASPN_-_95244323.23-P1P2	ASPN	CCACCTTGTTGGTATGGTAAGGCATAATGACGTTTAAGAGCTAAGCTG	GTATGGTAAGGCATAATGAC
ASPN_+_95244720.23-P1P2	ASPN	CCACCTTGTTGGCCCAGGGTGCAGCCACACCGTTTAAGAGCTAAGCTG	GCCCAGGGTGCAGCCACACC
ASPN_-_95244740.23-P1P2	ASPN	CCACCTTGTTGGTCCTGGTGTGGCTGCACCCGTTTAAGAGCTAAGCTG	GTCCTGGTGTGGCTGCACCC
ASPN_+_95244735.23-P1P2	ASPN	CCACCTTGTTGGTTTATTCCAGTATCACCCAGTTTAAGAGCTAAGCTG	GTTTATTCCAGTATCACCCA
ASTN1_-_177133425.23-P1P2	ASTN1	CCACCTTGTTGGGGATCCGGGAGGTAGGAGTGTTTAAGAGCTAAGCTG	GGGATCCGGGAGGTAGGAGT
ASTN1_+_177133808.23-P1P2	ASTN1	CCACCTTGTTGGAGGCGGCCGGGGCTCAAGAGTTTAAGAGCTAAGCTG	GAGGCGGCCGGGGCTCAAGA
ASTN1_-_177133359.23-P1P2	ASTN1	CCACCTTGTTGGGGAGAAGTCAGGTGCACAGGTTTAAGAGCTAAGCTG	GGGAGAAGTCAGGTGCACAG
ASTN1_+_177133827.23-P1P2	ASTN1	CCACCTTGTTGGCATCGCAGCGCTAGGAGGAGTTTAAGAGCTAAGCTG	GCATCGCAGCGCTAGGAGGA
ASTN1_-_177133855.23-P1P2	ASTN1	CCACCTTGTTGGCCTAGCGCTGCGATGGTggGTTTAAGAGCTAAGCTG	GCCTAGCGCTGCGATGGTgg
ASTN2_-_120177339.23-P1P2	ASTN2	CCACCTTGTTGGGGACGCCCGAGCTAAGGAGGTTTAAGAGCTAAGCTG	GGGACGCCCGAGCTAAGGAG
ASTN2_-_120176875.23-P1P2	ASTN2	CCACCTTGTTGGAGCAGGAGGCGCGACTCGGGTTTAAGAGCTAAGCTG	GAGCAGGAGGCGCGACTCGG
ASTN2_+_120176971.23-P1P2	ASTN2	CCACCTTGTTGGCCCTGCGGGAGAGCGACATGTTTAAGAGCTAAGCTG	GCCCTGCGGGAGAGCGACAT
ASTN2_-_120177334.23-P1P2	ASTN2	CCACCTTGTTGGAACCAGGACGCCCGAGCTAGTTTAAGAGCTAAGCTG	GAACCAGGACGCCCGAGCTA
ASTN2_+_120176962.23-P1P2	ASTN2	CCACCTTGTTGGAGAGCGACATCggctggagGTTTAAGAGCTAAGCTG	GAGAGCGACATCggctggag
ATP6AP2_+_40440237.23-P1P2	ATP6AP2	CCACCTTGTTGGCGACAGCCGCAGCGTGAGGGTTTAAGAGCTAAGCTG	GCGACAGCCGCAGCGTGAGG
ATP6AP2_+_40440214.23-P1P2	ATP6AP2	CCACCTTGTTGGGACGCGCTCGGACTCGTCCGTTTAAGAGCTAAGCTG	GGACGCGCTCGGACTCGTCC
ATP6AP2_+_40440259.23-P1P2	ATP6AP2	CCACCTTGTTGGGAACGGGCCGGCGGGACACGTTTAAGAGCTAAGCTG	GGAACGGGCCGGCGGGACAC
ATP6AP2_+_40440598.23-P1P2	ATP6AP2	CCACCTTGTTGGGGACGCGCCGCCCTCAAAGGTTTAAGAGCTAAGCTG	GGGACGCGCCGCCCTCAAAG
ATP6AP2_+_40440280.23-P1P2	ATP6AP2	CCACCTTGTTGGGCAGCACTGCGGGGCGACAGTTTAAGAGCTAAGCTG	GGCAGCACTGCGGGGCGACA
ATRN_-_3452205.23-P1P2	ATRN	CCACCTTGTTGGGAGGGTCGGGTCCAACCAGGTTTAAGAGCTAAGCTG	GGAGGGTCGGGTCCAACCAG
ATRN_-_3452079.23-P1P2	ATRN	CCACCTTGTTGGACCGGCCCTGTGTCAACGGGTTTAAGAGCTAAGCTG	GACCGGCCCTGTGTCAACGG
ATRN_-_3451695.23-P1P2	ATRN	CCACCTTGTTGGCCCGCACGGCCAGGCGAAGGTTTAAGAGCTAAGCTG	GCCCGCACGGCCAGGCGAAG
ATRN_-_3452100.23-P1P2	ATRN	CCACCTTGTTGGGTCGCTGCAACCCTGGCACGTTTAAGAGCTAAGCTG	GGTCGCTGCAACCCTGGCAC
ATRN_-_3452130.23-P1P2	ATRN	CCACCTTGTTGGTCTGCCCCGCCGGCTGGGTGTTTAAGAGCTAAGCTG	GTCTGCCCCGCCGGCTGGGT
ATRNL1_+_116853176.23-P1P2	ATRNL1	CCACCTTGTTGGCTCCTGAGGGGACCTGACCGTTTAAGAGCTAAGCTG	GCTCCTGAGGGGACCTGACC
ATRNL1_-_116853323.23-P1P2	ATRNL1	CCACCTTGTTGGGATGCCCGAGTGCGACTGGGTTTAAGAGCTAAGCTG	GGATGCCCGAGTGCGACTGG
ATRNL1_-_116853522.23-P1P2	ATRNL1	CCACCTTGTTGGCGGGGAAGATGGAGACTGGGTTTAAGAGCTAAGCTG	GCGGGGAAGATGGAGACTGG
ATRNL1_+_116853173.23-P1P2	ATRNL1	CCACCTTGTTGGCTGAGGGGACCTGACCGGGGTTTAAGAGCTAAGCTG	GCTGAGGGGACCTGACCGGG
ATRNL1_+_116853187.23-P1P2	ATRNL1	CCACCTTGTTGGTGCGCCCGGCGCTCCTGAGGTTTAAGAGCTAAGCTG	GTGCGCCCGGCGCTCCTGAG
AXL_+_41725166.23-P1P2	AXL	CCACCTTGTTGGCTGCCTGGCACAGCGGCAGGTTTAAGAGCTAAGCTG	GCTGCCTGGCACAGCGGCAG
AXL_-_41725592.23-P1P2	AXL	CCACCTTGTTGGgactgagagaggaactgaaGTTTAAGAGCTAAGCTG	Ggactgagagaggaactgaa
AXL_-_41725144.23-P1P2	AXL	CCACCTTGTTGGTGCTGAGAAGGCGGCTGCTGTTTAAGAGCTAAGCTG	GTGCTGAGAAGGCGGCTGCT
AXL_-_41725322.23-P1P2	AXL	CCACCTTGTTGGCGTGGCGGTGCCCCAGGATGTTTAAGAGCTAAGCTG	GCGTGGCGGTGCCCCAGGAT
AXL_-_41725205.23-P1P2	AXL	CCACCTTGTTGGGCAGGCAGTGCCAAATCCGGTTTAAGAGCTAAGCTG	GGCAGGCAGTGCCAAATCCG
BACE1_+_117186910.23-P1P2	BACE1	CCACCTTGTTGGGCCGCGAGCTGGATTATGGGTTTAAGAGCTAAGCTG	GGCCGCGAGCTGGATTATGG
BACE1_+_117186573.23-P1P2	BACE1	CCACCTTGTTGGCAGCACCACCCAGACTTGGGTTTAAGAGCTAAGCTG	GCAGCACCACCCAGACTTGG
BACE1_-_117186976.23-P1P2	BACE1	CCACCTTGTTGGGAGGCGGAAAGACTTGTGGGTTTAAGAGCTAAGCTG	GGAGGCGGAAAGACTTGTGG
BACE1_+_117186913.23-P1P2	BACE1	CCACCTTGTTGGCGAGCCGCGAGCTGGATTAGTTTAAGAGCTAAGCTG	GCGAGCCGCGAGCTGGATTA
BACE1_-_117186930.23-P1P2	BACE1	CCACCTTGTTGGGCCACCATAATCCAGCTCGGTTTAAGAGCTAAGCTG	GGCCACCATAATCCAGCTCG
BACE2_+_42540135.23-P1P2	BACE2	CCACCTTGTTGGTAGCCGGTCCCGTCCCGTCGTTTAAGAGCTAAGCTG	GTAGCCGGTCCCGTCCCGTC
BACE2_-_42540515.23-P1P2	BACE2	CCACCTTGTTGGCGCAGAAGGTAGGGACCCCGTTTAAGAGCTAAGCTG	GCGCAGAAGGTAGGGACCCC
BACE2_+_42540283.23-P1P2	BACE2	CCACCTTGTTGGTGGCCGCGGCCACCCGGAGGTTTAAGAGCTAAGCTG	GTGGCCGCGGCCACCCGGAG
BACE2_-_42540506.23-P1P2	BACE2	CCACCTTGTTGGGGACCCCCCCGCAGAAGGTGTTTAAGAGCTAAGCTG	GGGACCCCCCCGCAGAAGGT
BACE2_+_42540126.23-P1P2	BACE2	CCACCTTGTTGGCCGTCCCGTCCGGCAGCCGGTTTAAGAGCTAAGCTG	GCCGTCCCGTCCGGCAGCCG
BAI1_+_143531422.23-P1P2	BAI1	CCACCTTGTTGGCGCCGGCGAGGACTCGATCGTTTAAGAGCTAAGCTG	GCGCCGGCGAGGACTCGATC
BAI1_-_143531483.23-P1P2	BAI1	CCACCTTGTTGGAAGGTAAGGAAGGCTCCggGTTTAAGAGCTAAGCTG	GAAGGTAAGGAAGGCTCCgg
BAI1_-_143531007.23-P1P2	BAI1	CCACCTTGTTGGTCGCCAGGAAGGGGAAAAAGTTTAAGAGCTAAGCTG	GTCGCCAGGAAGGGGAAAAA
BAI1_-_143531524.23-P1P2	BAI1	CCACCTTGTTGGgtgggggcgcagcgagggtGTTTAAGAGCTAAGCTG	Ggtgggggcgcagcgagggt
BAI1_-_143531298.23-P1P2	BAI1	CCACCTTGTTGGGCCGGCGGGTGCTCTCCAGGTTTAAGAGCTAAGCTG	GGCCGGCGGGTGCTCTCCAG
BAI2_-_32229945.23-P1P2	BAI2	CCACCTTGTTGGCGCGCGCCGGGCCGAGTGAGTTTAAGAGCTAAGCTG	GCGCGCGCCGGGCCGAGTGA
BAI2_+_32229880.23-P1P2	BAI2	CCACCTTGTTGGCCGGAGGAACCGGGTTCGGGTTTAAGAGCTAAGCTG	GCCGGAGGAACCGGGTTCGG
BAI2_-_32229588.23-P1P2	BAI2	CCACCTTGTTGGACCGGGCCGGGCGCAGGGTGTTTAAGAGCTAAGCTG	GACCGGGCCGGGCGCAGGGT
BAI2_-_32229328.23-P1P2	BAI2	CCACCTTGTTGGGGAGTTCCCCAGAAGATGGGTTTAAGAGCTAAGCTG	GGGAGTTCCCCAGAAGATGG
BAI2_+_32229554.23-P1P2	BAI2	CCACCTTGTTGGCGGCCCGGTCCCCGACTTAGTTTAAGAGCTAAGCTG	GCGGCCCGGTCCCCGACTTA
BAI3_+_69345575.23-P1P2	BAI3	CCACCTTGTTGGGAGGGAGAAGCCCCCCCAAGTTTAAGAGCTAAGCTG	GGAGGGAGAAGCCCCCCCAA
BAI3_+_69345564.23-P1P2	BAI3	CCACCTTGTTGGCCCCCCAAGGGAGACTCTAGTTTAAGAGCTAAGCTG	GCCCCCCAAGGGAGACTCTA
BAI3_+_69345220.23-P1P2	BAI3	CCACCTTGTTGGCGAGGAGGGAGGCGCGAGAGTTTAAGAGCTAAGCTG	GCGAGGAGGGAGGCGCGAGA
BAI3_+_69345458.23-P1P2	BAI3	CCACCTTGTTGGTGAGACGAGAAGTGACCGGGTTTAAGAGCTAAGCTG	GTGAGACGAGAAGTGACCGG
BAI3_+_69345275.23-P1P2	BAI3	CCACCTTGTTGGGAGCGGGGAAAAAAATCCTGTTTAAGAGCTAAGCTG	GGAGCGGGGAAAAAAATCCT
BAMBI_+_28966480.23-P1P2	BAMBI	CCACCTTGTTGGGGGTCTCCACAGCACGCAAGTTTAAGAGCTAAGCTG	GGGGTCTCCACAGCACGCAA
BAMBI_-_28966451.23-P1P2	BAMBI	CCACCTTGTTGGCGCGGAGCCGGAGAGACCTGTTTAAGAGCTAAGCTG	GCGCGGAGCCGGAGAGACCT
BAMBI_-_28966906.23-P1P2	BAMBI	CCACCTTGTTGGCGTGCTGCTCACCAAAGGTGTTTAAGAGCTAAGCTG	GCGTGCTGCTCACCAAAGGT
BAMBI_+_28966499.23-P1P2	BAMBI	CCACCTTGTTGGGTTCTCAGCGAAGAGAGTAGTTTAAGAGCTAAGCTG	GGTTCTCAGCGAAGAGAGTA
BAMBI_+_28966878.23-P1P2	BAMBI	CCACCTTGTTGGTTGGTGAGCAGCACGGCCAGTTTAAGAGCTAAGCTG	GTTGGTGAGCAGCACGGCCA
BCAM_+_45312387.23-P1P2	BCAM	CCACCTTGTTGGcctgggccggTGCGTCCGGGTTTAAGAGCTAAGCTG	GcctgggccggTGCGTCCGG
BCAM_+_45312370.23-P1P2	BCAM	CCACCTTGTTGGGGGGGCTCCATGTTCACGGGTTTAAGAGCTAAGCTG	GGGGGGCTCCATGTTCACGG
BCAM_+_45312367.23-P1P2	BCAM	CCACCTTGTTGGGGCTCCATGTTCACGGCGGGTTTAAGAGCTAAGCTG	GGGCTCCATGTTCACGGCGG
BCAM_-_45312592.23-P1P2	BCAM	CCACCTTGTTGGCCCCAAGGAGGAGGGATATGTTTAAGAGCTAAGCTG	GCCCCAAGGAGGAGGGATAT
BCAM_-_45312402.23-P1P2	BCAM	CCACCTTGTTGGATGGAGCCCCCGGACGCAcGTTTAAGAGCTAAGCTG	GATGGAGCCCCCGGACGCAc
BCAN_+_156611934.23-P1P2	BCAN	CCACCTTGTTGGACTGCGCGAGCGTGAGGAGGTTTAAGAGCTAAGCTG	GACTGCGCGAGCGTGAGGAG
BCAN_+_156612323.23-P1P2	BCAN	CCACCTTGTTGGGAAGATGCGAGGACCCGAGGTTTAAGAGCTAAGCTG	GGAAGATGCGAGGACCCGAG
BCAN_-_156612006.23-P1P2	BCAN	CCACCTTGTTGGGACTGAGCCGTGCACCCGGGTTTAAGAGCTAAGCTG	GGACTGAGCCGTGCACCCGG
BCAN_+_156612057.23-P1P2	BCAN	CCACCTTGTTGGGGAGGCACTCACCTACCCAGTTTAAGAGCTAAGCTG	GGGAGGCACTCACCTACCCA
BCAN_-_156612331.23-P1P2	BCAN	CCACCTTGTTGGGTCTGATCAGCAACCCCTCGTTTAAGAGCTAAGCTG	GGTCTGATCAGCAACCCCTC
BGN_+_152760628.23-P1P2	BGN	CCACCTTGTTGGCCAGGGCTTGGGACAGCGGGTTTAAGAGCTAAGCTG	GCCAGGGCTTGGGACAGCGG
BGN_+_152760894.23-P1P2	BGN	CCACCTTGTTGGACCCAGCCACGCTCTAGGGGTTTAAGAGCTAAGCTG	GACCCAGCCACGCTCTAGGG
BGN_-_152760510.23-P1P2	BGN	CCACCTTGTTGGCACCGGACAGATAGACGTGGTTTAAGAGCTAAGCTG	GCACCGGACAGATAGACGTG
BGN_+_152760897.23-P1P2	BGN	CCACCTTGTTGGGTCACCCAGCCACGCTCTAGTTTAAGAGCTAAGCTG	GGTCACCCAGCCACGCTCTA
BGN_+_152760479.23-P1P2	BGN	CCACCTTGTTGGATCTGTCCGGTGTGTCCGGGTTTAAGAGCTAAGCTG	GATCTGTCCGGTGTGTCCGG
BMP4_+_54423527.23-P1	BMP4	CCACCTTGTTGGgaggaaggaagatgcgagaGTTTAAGAGCTAAGCTG	Ggaggaaggaagatgcgaga
BMP4_+_54423466.23-P1	BMP4	CCACCTTGTTGGCCCGGAAGCTAGGTGAGTGGTTTAAGAGCTAAGCTG	GCCCGGAAGCTAGGTGAGTG
BMP4_+_54423266.23-P1	BMP4	CCACCTTGTTGGCCGCTACTGCAGGGACCTAGTTTAAGAGCTAAGCTG	GCCGCTACTGCAGGGACCTA
BMP4_+_54423475.23-P1	BMP4	CCACCTTGTTGGGGAGCCCGGCCCGGAAGCTGTTTAAGAGCTAAGCTG	GGGAGCCCGGCCCGGAAGCT
BMP4_-_54423062.23-P1	BMP4	CCACCTTGTTGGCAAAGGTGAGAATCTCCCAGTTTAAGAGCTAAGCTG	GCAAAGGTGAGAATCTCCCA
BMP4_-_54420114.23-P2	BMP4	CCACCTTGTTGGTCGGGATGGCACTACGGAAGTTTAAGAGCTAAGCTG	GTCGGGATGGCACTACGGAA
BMP4_-_54419675.23-P2	BMP4	CCACCTTGTTGGGAACGCGCCACGGAGACACGTTTAAGAGCTAAGCTG	GGAACGCGCCACGGAGACAC
BMP4_-_54419696.23-P2	BMP4	CCACCTTGTTGGGGGGCTCTCCCAGACAAGTGTTTAAGAGCTAAGCTG	GGGGGCTCTCCCAGACAAGT
BMP4_-_54419666.23-P2	BMP4	CCACCTTGTTGGAGAGAGTGGGAACGCGCCAGTTTAAGAGCTAAGCTG	GAGAGAGTGGGAACGCGCCA
BMP4_-_54420101.23-P2	BMP4	CCACCTTGTTGGAGCAGTGCGTTGCTCGGGAGTTTAAGAGCTAAGCTG	GAGCAGTGCGTTGCTCGGGA
BMPR1A_-_88516386.23-P1P2	BMPR1A	CCACCTTGTTGGCCCTCCTGGCAAGAGTCGGGTTTAAGAGCTAAGCTG	GCCCTCCTGGCAAGAGTCGG
BMPR1A_-_88516383.23-P1P2	BMPR1A	CCACCTTGTTGGcTCCCCTCCTGGCAAGAGTGTTTAAGAGCTAAGCTG	GcTCCCCTCCTGGCAAGAGT
BMPR1A_-_88516389.23-P1P2	BMPR1A	CCACCTTGTTGGTCCTGGCAAGAGTCGGCGGGTTTAAGAGCTAAGCTG	GTCCTGGCAAGAGTCGGCGG
BMPR1A_+_88516399.23-P1P2	BMPR1A	CCACCTTGTTGGCGGATTCCAATCTCTGCAGGTTTAAGAGCTAAGCTG	GCGGATTCCAATCTCTGCAG
BMPR1A_-_88516862.23-P1P2	BMPR1A	CCACCTTGTTGGCCGCCCAGCCAGAGACCCAGTTTAAGAGCTAAGCTG	GCCGCCCAGCCAGAGACCCA
BMPR1B_-_95679535.23-P1P2	BMPR1B	CCACCTTGTTGGCTGCGCAGGCGAGGAGTCGGTTTAAGAGCTAAGCTG	GCTGCGCAGGCGAGGAGTCG
BMPR1B_-_95679116.23-P1P2	BMPR1B	CCACCTTGTTGGcgcggcggcCAGAAGTTGAGTTTAAGAGCTAAGCTG	GcgcggcggcCAGAAGTTGA
BMPR1B_-_95679183.23-P1P2	BMPR1B	CCACCTTGTTGGCCGGGCAGTGCGGAGACCGGTTTAAGAGCTAAGCTG	GCCGGGCAGTGCGGAGACCG
BMPR1B_-_95679577.23-P1P2	BMPR1B	CCACCTTGTTGGACACGTGCTTCGGGCTGTAGTTTAAGAGCTAAGCTG	GACACGTGCTTCGGGCTGTA
BMPR1B_-_95679541.23-P1P2	BMPR1B	CCACCTTGTTGGAGGCGAGGAGTCGGGGCAGGTTTAAGAGCTAAGCTG	GAGGCGAGGAGTCGGGGCAG
BMPR2_+_203241081.23-P1P2	BMPR2	CCACCTTGTTGGCTCCGGGAGGCACTTCCAGGTTTAAGAGCTAAGCTG	GCTCCGGGAGGCACTTCCAG
BMPR2_+_203241093.23-P1P2	BMPR2	CCACCTTGTTGGCACCCTGCGTCCCTCCGGGGTTTAAGAGCTAAGCTG	GCACCCTGCGTCCCTCCGGG
BMPR2_+_203241453.23-P1P2	BMPR2	CCACCTTGTTGGCGGTCCGGGCTCCCCGAGAGTTTAAGAGCTAAGCTG	GCGGTCCGGGCTCCCCGAGA
BMPR2_+_203241440.23-P1P2	BMPR2	CCACCTTGTTGGCCGAGACGGCAGGCGGAGTGTTTAAGAGCTAAGCTG	GCCGAGACGGCAGGCGGAGT
BMPR2_-_203241426.23-P1P2	BMPR2	CCACCTTGTTGGGCCGCCGGGAGGACTAGAAGTTTAAGAGCTAAGCTG	GGCCGCCGGGAGGACTAGAA
BOC_+_112930423.23-P1P2	BOC	CCACCTTGTTGGCGCACCCGGTCCCTCCATAGTTTAAGAGCTAAGCTG	GCGCACCCGGTCCCTCCATA
BOC_+_112930804.23-P1P2	BOC	CCACCTTGTTGGGCCCGGGGGCCAGCGTGGTGTTTAAGAGCTAAGCTG	GGCCCGGGGGCCAGCGTGGT
BOC_-_112930359.23-P1P2	BOC	CCACCTTGTTGGctcctcGCACGGTAATGGGGTTTAAGAGCTAAGCTG	GctcctcGCACGGTAATGGG
BOC_+_112930840.23-P1P2	BOC	CCACCTTGTTGGTCTGCTGCAGCCGGCGCCTGTTTAAGAGCTAAGCTG	GTCTGCTGCAGCCGGCGCCT
BOC_+_112930825.23-P1P2	BOC	CCACCTTGTTGGGCCTGGGAAGGGCGAGCCGGTTTAAGAGCTAAGCTG	GGCCTGGGAAGGGCGAGCCG
BRAF_-_140624520.23-P1P2	BRAF	CCACCTTGTTGGCCATCTTATAACCGAGAGCGTTTAAGAGCTAAGCTG	GCCATCTTATAACCGAGAGC
BRAF_-_140624678.23-P1P2	BRAF	CCACCTTGTTGGagggcgccTGGGCCACCTCGTTTAAGAGCTAAGCTG	GagggcgccTGGGCCACCTC
BRAF_+_140624087.23-P1P2	BRAF	CCACCTTGTTGGGCGGGAGGCTATCAATAGGGTTTAAGAGCTAAGCTG	GGCGGGAGGCTATCAATAGG
BRAF_-_140624725.23-P1P2	BRAF	CCACCTTGTTGGCCGAGCCTGAGGGGATTGGGTTTAAGAGCTAAGCTG	GCCGAGCCTGAGGGGATTGG
BRAF_-_140624717.23-P1P2	BRAF	CCACCTTGTTGGgggcgcAGCCGAGCCTGAGGTTTAAGAGCTAAGCTG	GgggcgcAGCCGAGCCTGAG
BSG_-_572618.23-P1P2	BSG	CCACCTTGTTGGCGGTTGGAGGTTGTAGGACGTTTAAGAGCTAAGCTG	GCGGTTGGAGGTTGTAGGAC
BSG_+_572680.23-P1P2	BSG	CCACCTTGTTGGCCAGCCCCGGAGGCTCCGTGTTTAAGAGCTAAGCTG	GCCAGCCCCGGAGGCTCCGT
BSG_-_572629.23-P1P2	BSG	CCACCTTGTTGGTGTAGGACCGGCGAGGAATGTTTAAGAGCTAAGCTG	GTGTAGGACCGGCGAGGAAT
BSG_-_573030.23-P1P2	BSG	CCACCTTGTTGGGGCCGGTCTTGGTCAGGGGGTTTAAGAGCTAAGCTG	GGGCCGGTCTTGGTCAGGGG
BSG_-_573027.23-P1P2	BSG	CCACCTTGTTGGCCAGGCCGGTCTTGGTCAGGTTTAAGAGCTAAGCTG	GCCAGGCCGGTCTTGGTCAG
BST1_-_15704748.23-P1P2	BST1	CCACCTTGTTGGAGTGGAGGAAGCACGGGACGTTTAAGAGCTAAGCTG	GAGTGGAGGAAGCACGGGAC
BST1_-_15704751.23-P1P2	BST1	CCACCTTGTTGGGGAGGAAGCACGGGACTGGGTTTAAGAGCTAAGCTG	GGGAGGAAGCACGGGACTGG
BST1_+_15704762.23-P1P2	BST1	CCACCTTGTTGGCACCCCTGGGCCGCCATCGGTTTAAGAGCTAAGCTG	GCACCCCTGGGCCGCCATCG
BST1_-_15704960.23-P1P2	BST1	CCACCTTGTTGGTGAGTCCCGAGCAGCGGTGGTTTAAGAGCTAAGCTG	GTGAGTCCCGAGCAGCGGTG
BST1_-_15705074.23-P1P2	BST1	CCACCTTGTTGGCAATGAGAGAGGCCTTGAGGTTTAAGAGCTAAGCTG	GCAATGAGAGAGGCCTTGAG
BTC_-_75719643.23-P1P2	BTC	CCACCTTGTTGGGCCTGGAAACTAATCCCGGGTTTAAGAGCTAAGCTG	GGCCTGGAAACTAATCCCGG
BTC_-_75719690.23-P1P2	BTC	CCACCTTGTTGGGGCTGGCACCCTGGCTACAGTTTAAGAGCTAAGCTG	GGGCTGGCACCCTGGCTACA
BTC_+_75719238.23-P1P2	BTC	CCACCTTGTTGGGACGCGTGAGAAGGCCCGAGTTTAAGAGCTAAGCTG	GGACGCGTGAGAAGGCCCGA
BTC_-_75719695.23-P1P2	BTC	CCACCTTGTTGGGCACCCTGGCTACAAGGCAGTTTAAGAGCTAAGCTG	GGCACCCTGGCTACAAGGCA
BTC_+_75719285.23-P1P2	BTC	CCACCTTGTTGGTCTGGCAATTGGGCACCTGGTTTAAGAGCTAAGCTG	GTCTGGCAATTGGGCACCTG
BTD_-_15643491.23-P1P2	BTD	CCACCTTGTTGGCGCCCAGTTGGACTTGGGGGTTTAAGAGCTAAGCTG	GCGCCCAGTTGGACTTGGGG
BTD_+_15643742.23-P1P2	BTD	CCACCTTGTTGGAAACAGGATTCAGGATCTCGTTTAAGAGCTAAGCTG	GAAACAGGATTCAGGATCTC
BTD_+_15643305.23-P1P2	BTD	CCACCTTGTTGGCTGGCCGACTCGGAGACAAGTTTAAGAGCTAAGCTG	GCTGGCCGACTCGGAGACAA
BTD_-_15643297.23-P1P2	BTD	CCACCTTGTTGGGGTAAGAAGCCGAACTCTGGTTTAAGAGCTAAGCTG	GGGTAAGAAGCCGAACTCTG
BTD_+_15644015.23-P1P2	BTD	CCACCTTGTTGGAGAGGGTCTAATGACTCCAGTTTAAGAGCTAAGCTG	GAGAGGGTCTAATGACTCCA
BTLA_-_112218302.23-P1P2	BTLA	CCACCTTGTTGGGTCAGTTTACCTACCCCAGGTTTAAGAGCTAAGCTG	GGTCAGTTTACCTACCCCAG
BTLA_-_112217925.23-P1P2	BTLA	CCACCTTGTTGGTGATGCGATGCCTATGATTGTTTAAGAGCTAAGCTG	GTGATGCGATGCCTATGATT
BTLA_+_112217914.23-P1P2	BTLA	CCACCTTGTTGGTATTCACCTGCCTAATCATGTTTAAGAGCTAAGCTG	GTATTCACCTGCCTAATCAT
BTLA_-_112218247.23-P1P2	BTLA	CCACCTTGTTGGGAAAAACTGCTCAAGTAGAGTTTAAGAGCTAAGCTG	GGAAAAACTGCTCAAGTAGA
BTLA_+_112217895.23-P1P2	BTLA	CCACCTTGTTGGAGGCATCGCATCAATAGCTGTTTAAGAGCTAAGCTG	GAGGCATCGCATCAATAGCT
BTN1A1_+_26501882.23-ENST00000244513.6	BTN1A1	CCACCTTGTTGGCGTTCGGAGACAGGCGACAGTTTAAGAGCTAAGCTG	GCGTTCGGAGACAGGCGACA
BTN1A1_-_26501474.23-ENST00000244513.6	BTN1A1	CCACCTTGTTGGCTAGGCTGAAGCTCCTGAGGTTTAAGAGCTAAGCTG	GCTAGGCTGAAGCTCCTGAG
BTN1A1_+_26501670.23-ENST00000244513.6	BTN1A1	CCACCTTGTTGGGATCCAGTGGAGGTCTCCAGTTTAAGAGCTAAGCTG	GGATCCAGTGGAGGTCTCCA
BTN1A1_+_26501846.23-ENST00000244513.6	BTN1A1	CCACCTTGTTGGCACCCACAACGGCCAGGATGTTTAAGAGCTAAGCTG	GCACCCACAACGGCCAGGAT
BTN1A1_-_26501511.23-ENST00000244513.6	BTN1A1	CCACCTTGTTGGCTTGCTGCTCCAGAAGGGTGTTTAAGAGCTAAGCTG	GCTTGCTGCTCCAGAAGGGT
BTN2A1_-_26458417.23-P1P2	BTN2A1	CCACCTTGTTGGGCTCCGGGGTGGGCACAGTGTTTAAGAGCTAAGCTG	GGCTCCGGGGTGGGCACAGT
BTN2A1_+_26458245.23-P1P2	BTN2A1	CCACCTTGTTGGACACAAACCTTCCCAAAAGGTTTAAGAGCTAAGCTG	GACACAAACCTTCCCAAAAG
BTN2A1_-_26458220.23-P1P2	BTN2A1	CCACCTTGTTGGTCTCCAAACATGGCGACCTGTTTAAGAGCTAAGCTG	GTCTCCAAACATGGCGACCT
BTN2A1_+_26458202.23-P1P2	BTN2A1	CCACCTTGTTGGTCTCCTAGGTCGCCATGTTGTTTAAGAGCTAAGCTG	GTCTCCTAGGTCGCCATGTT
BTN2A1_+_26458282.23-P1P2	BTN2A1	CCACCTTGTTGGTTCTCTCCAATCTGCCCAGGTTTAAGAGCTAAGCTG	GTTCTCTCCAATCTGCCCAG
BTN2A2_-_26383797.23-P1P2	BTN2A2	CCACCTTGTTGGGGACTGTGGCCCGAGAAGTGTTTAAGAGCTAAGCTG	GGGACTGTGGCCCGAGAAGT
BTN2A2_-_26383760.23-P1P2	BTN2A2	CCACCTTGTTGGGAGGGTGTGAAAGAATCCAGTTTAAGAGCTAAGCTG	GGAGGGTGTGAAAGAATCCA
BTN2A2_+_26383703.23-P1P2	BTN2A2	CCACCTTGTTGGCCCTCCCCGAGACCCAGGTGTTTAAGAGCTAAGCTG	GCCCTCCCCGAGACCCAGGT
BTN2A2_-_26383667.23-P1P2	BTN2A2	CCACCTTGTTGGAGACAGGAAGCCTACTGGTGTTTAAGAGCTAAGCTG	GAGACAGGAAGCCTACTGGT
BTN2A2_-_26383720.23-P1P2	BTN2A2	CCACCTTGTTGGTGTCCCGACCTGGGTCTCGGTTTAAGAGCTAAGCTG	GTGTCCCGACCTGGGTCTCG
BTN3A1_+_26402505.23-P1P2	BTN3A1	CCACCTTGTTGGAGACTGTCGGGTCATCGTGGTTTAAGAGCTAAGCTG	GAGACTGTCGGGTCATCGTG
BTN3A1_+_26402516.23-P1P2	BTN3A1	CCACCTTGTTGGAAAGAAAGCAGAGACTGTCGTTTAAGAGCTAAGCTG	GAAAGAAAGCAGAGACTGTC
BTN3A1_+_26402548.23-P1P2	BTN3A1	CCACCTTGTTGGCTATGGTTAAATCTCCTTCGTTTAAGAGCTAAGCTG	GCTATGGTTAAATCTCCTTC
BTN3A1_-_26402650.23-P1P2	BTN3A1	CCACCTTGTTGGAATGCTAAGAGGTGAGTGGGTTTAAGAGCTAAGCTG	GAATGCTAAGAGGTGAGTGG
BTN3A1_+_26402759.23-P1P2	BTN3A1	CCACCTTGTTGGTGTGCGTGCGCACCCCCTCGTTTAAGAGCTAAGCTG	GTGTGCGTGCGCACCCCCTC
BTN3A2_-_26365494.23-P1P2	BTN3A2	CCACCTTGTTGGTTCCTTTCTTCCGGATGAGGTTTAAGAGCTAAGCTG	GTTCCTTTCTTCCGGATGAG
BTN3A2_-_26365623.23-P1P2	BTN3A2	CCACCTTGTTGGAGCCTGGGCTACAACGCATGTTTAAGAGCTAAGCTG	GAGCCTGGGCTACAACGCAT
BTN3A2_-_26365832.23-P1P2	BTN3A2	CCACCTTGTTGGAAAGTATAAGGAACTGCAGGTTTAAGAGCTAAGCTG	GAAAGTATAAGGAACTGCAG
BTN3A2_-_26365799.23-P1P2	BTN3A2	CCACCTTGTTGGTATGGGCACGTGGGAAGACGTTTAAGAGCTAAGCTG	GTATGGGCACGTGGGAAGAC
BTN3A2_-_26365626.23-P1P2	BTN3A2	CCACCTTGTTGGCTGGGCTACAACGCATGGGGTTTAAGAGCTAAGCTG	GCTGGGCTACAACGCATGGG
BTN3A3_+_26440775.23-P1P2	BTN3A3	CCACCTTGTTGGAGTCTCTCATTCCGAAGAAGTTTAAGAGCTAAGCTG	GAGTCTCTCATTCCGAAGAA
BTN3A3_-_26440981.23-P1P2	BTN3A3	CCACCTTGTTGGCAGGGAGAGTACTTGCCCAGTTTAAGAGCTAAGCTG	GCAGGGAGAGTACTTGCCCA
BTN3A3_-_26440919.23-P1P2	BTN3A3	CCACCTTGTTGGAGCCTGGGCTACAATGCCTGTTTAAGAGCTAAGCTG	GAGCCTGGGCTACAATGCCT
BTN3A3_-_26441137.23-P1P2	BTN3A3	CCACCTTGTTGGACCTGCAGATATTGGGATTGTTTAAGAGCTAAGCTG	GACCTGCAGATATTGGGATT
BTN3A3_-_26440986.23-P1P2	BTN3A3	CCACCTTGTTGGAGAGTACTTGCCCAGGGAAGTTTAAGAGCTAAGCTG	GAGAGTACTTGCCCAGGGAA
BTNL3_+_180415939.23-P1P2	BTNL3	CCACCTTGTTGGAGGTCAGGCCAGCTGTCTCGTTTAAGAGCTAAGCTG	GAGGTCAGGCCAGCTGTCTC
BTNL3_-_180416279.23-P1P2	BTNL3	CCACCTTGTTGGGAATTGAGGAAGACTCCTTGTTTAAGAGCTAAGCTG	GGAATTGAGGAAGACTCCTT
BTNL3_-_180415886.23-P1P2	BTNL3	CCACCTTGTTGGCATGTTTAGGGAGGCTCTAGTTTAAGAGCTAAGCTG	GCATGTTTAGGGAGGCTCTA
BTNL3_-_180416327.23-P1P2	BTNL3	CCACCTTGTTGGCACAGTAGCTCAGAATAATGTTTAAGAGCTAAGCTG	GCACAGTAGCTCAGAATAAT
BTNL3_-_180416372.23-P1P2	BTNL3	CCACCTTGTTGGGAACACATTGAGAACGCCAGTTTAAGAGCTAAGCTG	GGAACACATTGAGAACGCCA
BTNL8_+_180326192.23-P1P2	BTNL8	CCACCTTGTTGGAGGTGCGGAAGCCACGGAGGTTTAAGAGCTAAGCTG	GAGGTGCGGAAGCCACGGAG
BTNL8_+_180326206.23-P1P2	BTNL8	CCACCTTGTTGGTGGCCTAATGCTCAAGGTGGTTTAAGAGCTAAGCTG	GTGGCCTAATGCTCAAGGTG
BTNL8_+_180326197.23-P1P2	BTNL8	CCACCTTGTTGGGCTCAAGGTGCGGAAGCCAGTTTAAGAGCTAAGCTG	GGCTCAAGGTGCGGAAGCCA
BTNL8_+_180326560.23-P1P2	BTNL8	CCACCTTGTTGGGTGTCCCCGTCAACGATCAGTTTAAGAGCTAAGCTG	GGTGTCCCCGTCAACGATCA
BTNL8_-_180326635.23-P1P2	BTNL8	CCACCTTGTTGGTTCTCCCAGATGGGCTGAGGTTTAAGAGCTAAGCTG	GTTCTCCCAGATGGGCTGAG
BTNL9_+_180467694.23-P1	BTNL9	CCACCTTGTTGGAGATGGACTGCCCCAAGAAGTTTAAGAGCTAAGCTG	GAGATGGACTGCCCCAAGAA
BTNL9_+_180467681.23-P1	BTNL9	CCACCTTGTTGGCAAGAAGGGAACCGCAATGGTTTAAGAGCTAAGCTG	GCAAGAAGGGAACCGCAATG
BTNL9_+_180467304.23-P1	BTNL9	CCACCTTGTTGGAGATTCCCTAGACGTGGACGTTTAAGAGCTAAGCTG	GAGATTCCCTAGACGTGGAC
BTNL9_-_180467320.23-P1	BTNL9	CCACCTTGTTGGAGCTGCCAGTCCACGTCTAGTTTAAGAGCTAAGCTG	GAGCTGCCAGTCCACGTCTA
BTNL9_-_180467630.23-P1	BTNL9	CCACCTTGTTGGAGGTGGGCCGCATCTCAGGGTTTAAGAGCTAAGCTG	GAGGTGGGCCGCATCTCAGG
BTNL9_-_180480501.23-P2	BTNL9	CCACCTTGTTGGAGCAGGCGGAGAAGAGACAGTTTAAGAGCTAAGCTG	GAGCAGGCGGAGAAGAGACA
BTNL9_+_180480090.23-P2	BTNL9	CCACCTTGTTGGCCTCCCGCGGGACCTTCTCGTTTAAGAGCTAAGCTG	GCCTCCCGCGGGACCTTCTC
BTNL9_-_180480107.23-P2	BTNL9	CCACCTTGTTGGGCGCCCGGAGAAGGTCCCGGTTTAAGAGCTAAGCTG	GGCGCCCGGAGAAGGTCCCG
BTNL9_-_180480119.23-P2	BTNL9	CCACCTTGTTGGGGTCCCGCGGGAGGTTTCCGTTTAAGAGCTAAGCTG	GGGTCCCGCGGGAGGTTTCC
BTNL9_+_180480101.23-P2	BTNL9	CCACCTTGTTGGGTGCCGGGAAACCTCCCGCGTTTAAGAGCTAAGCTG	GGTGCCGGGAAACCTCCCGC
C10orf128_+_50396368.23-P1P2	C10orf128	CCACCTTGTTGGAGCGCCAGCATGAACTTGGGTTTAAGAGCTAAGCTG	GAGCGCCAGCATGAACTTGG
C10orf128_+_50396278.23-P1P2	C10orf128	CCACCTTGTTGGCTCAGTGGGCAGGAAACTGGTTTAAGAGCTAAGCTG	GCTCAGTGGGCAGGAAACTG
C10orf128_-_50396429.23-P1P2	C10orf128	CCACCTTGTTGGTCCTGGCTGCTGGCAGCGCGTTTAAGAGCTAAGCTG	GTCCTGGCTGCTGGCAGCGC
C10orf128_+_50395891.23-P1P2	C10orf128	CCACCTTGTTGGCATGTAGGCATGTAGATACGTTTAAGAGCTAAGCTG	GCATGTAGGCATGTAGATAC
C10orf128_-_50396310.23-P1P2	C10orf128	CCACCTTGTTGGTGCCCACTGAGGCTCCCCCGTTTAAGAGCTAAGCTG	GTGCCCACTGAGGCTCCCCC
C10orf54_+_73533265.23-P1P2	C10orf54	CCACCTTGTTGGGCTCGCACTCAGTCGCGGGGTTTAAGAGCTAAGCTG	GGCTCGCACTCAGTCGCGGG
C10orf54_-_73532929.23-P1P2	C10orf54	CCACCTTGTTGGTGTGCCCGATGCCTAGCTGGTTTAAGAGCTAAGCTG	GTGTGCCCGATGCCTAGCTG
C10orf54_+_73532875.23-P1P2	C10orf54	CCACCTTGTTGGTGACAGCTGCCCAAGTGGCGTTTAAGAGCTAAGCTG	GTGACAGCTGCCCAAGTGGC
C10orf54_+_73533269.23-P1P2	C10orf54	CCACCTTGTTGGACTCGCTCGCACTCAGTCGGTTTAAGAGCTAAGCTG	GACTCGCTCGCACTCAGTCG
C10orf54_+_73532789.23-P1P2	C10orf54	CCACCTTGTTGGAGCTTCTGCAAAGAAGGAGGTTTAAGAGCTAAGCTG	GAGCTTCTGCAAAGAAGGAG
C11orf24_-_68039370.23-P1P2	C11orf24	CCACCTTGTTGGCTGGTGGCCCTCGGACAGTGTTTAAGAGCTAAGCTG	GCTGGTGGCCCTCGGACAGT
C11orf24_-_68039374.23-P1P2	C11orf24	CCACCTTGTTGGTGGCCCTCGGACAGTAGGAGTTTAAGAGCTAAGCTG	GTGGCCCTCGGACAGTAGGA
C11orf24_+_68038998.23-P1P2	C11orf24	CCACCTTGTTGGGGCCGGCTTGTCCCATTGTGTTTAAGAGCTAAGCTG	GGGCCGGCTTGTCCCATTGT
C11orf24_-_68039419.23-P1P2	C11orf24	CCACCTTGTTGGGTGGCCGGCAGCGCAACCCGTTTAAGAGCTAAGCTG	GGTGGCCGGCAGCGCAACCC
C11orf24_-_68039306.23-P1P2	C11orf24	CCACCTTGTTGGCTGACAGCAGCTACCCGGAGTTTAAGAGCTAAGCTG	GCTGACAGCAGCTACCCGGA
C11orf34_-_112130899.23-P1P2	C11orf34	CCACCTTGTTGGCTGGGACTCAGTGAATCTGGTTTAAGAGCTAAGCTG	GCTGGGACTCAGTGAATCTG
C11orf34_-_112131313.23-P1P2	C11orf34	CCACCTTGTTGGATGTCATGGAAGACTGCCAGTTTAAGAGCTAAGCTG	GATGTCATGGAAGACTGCCA
C11orf34_+_112130916.23-P1P2	C11orf34	CCACCTTGTTGGCCTTGTGAACTCAAGCCACGTTTAAGAGCTAAGCTG	GCCTTGTGAACTCAAGCCAC
C11orf34_+_112130861.23-P1P2	C11orf34	CCACCTTGTTGGCCCAGCAAGAGCACACTTGGTTTAAGAGCTAAGCTG	GCCCAGCAAGAGCACACTTG
C11orf34_-_112131235.23-P1P2	C11orf34	CCACCTTGTTGGGTGCTACTGTACCTTATAAGTTTAAGAGCTAAGCTG	GGTGCTACTGTACCTTATAA
C11orf87_-_109293001.23-P1P2	C11orf87	CCACCTTGTTGGGCGGTCCAGGTAAGAGACAGTTTAAGAGCTAAGCTG	GGCGGTCCAGGTAAGAGACA
C11orf87_+_109292961.23-P1P2	C11orf87	CCACCTTGTTGGCGCCGGCTGGCTGCAAGGAGTTTAAGAGCTAAGCTG	GCGCCGGCTGGCTGCAAGGA
C11orf87_-_109293380.23-P1P2	C11orf87	CCACCTTGTTGGCAGGCTACTGCCAAGTTGGGTTTAAGAGCTAAGCTG	GCAGGCTACTGCCAAGTTGG
C11orf87_-_109292955.23-P1P2	C11orf87	CCACCTTGTTGGCGCCACTGCAGCCGCGCGGGTTTAAGAGCTAAGCTG	GCGCCACTGCAGCCGCGCGG
C11orf87_+_109293345.23-P1P2	C11orf87	CCACCTTGTTGGGTAGCCTGCTTCTTTCTAGGTTTAAGAGCTAAGCTG	GGTAGCCTGCTTCTTTCTAG
C14orf37_+_58618906.23-ENST00000267485.7	C14orf37	CCACCTTGTTGGCCCCTAGCGTCCCAGACAGGTTTAAGAGCTAAGCTG	GCCCCTAGCGTCCCAGACAG
C14orf37_+_58618903.23-ENST00000267485.7	C14orf37	CCACCTTGTTGGCTAGCGTCCCAGACAGCGGGTTTAAGAGCTAAGCTG	GCTAGCGTCCCAGACAGCGG
C14orf37_-_58618866.23-ENST00000267485.7	C14orf37	CCACCTTGTTGGGCGCTCGGCATCCCAGCGGGTTTAAGAGCTAAGCTG	GGCGCTCGGCATCCCAGCGG
C14orf37_-_58618498.23-ENST00000267485.7	C14orf37	CCACCTTGTTGGGCTCCGCCAGCACAAAGGCGTTTAAGAGCTAAGCTG	GGCTCCGCCAGCACAAAGGC
C14orf37_-_58618639.23-ENST00000267485.7	C14orf37	CCACCTTGTTGGGCGCTCCGGAGGAGGATCGGTTTAAGAGCTAAGCTG	GGCGCTCCGGAGGAGGATCG
C16orf91_+_1470729.23-P1P2	C16orf91	CCACCTTGTTGGGGCGTCAGTCGAGGAGTCAGTTTAAGAGCTAAGCTG	GGGCGTCAGTCGAGGAGTCA
C16orf91_+_1470677.23-P1P2	C16orf91	CCACCTTGTTGGCGGCCGGGTGAGCTCCTCAGTTTAAGAGCTAAGCTG	GCGGCCGGGTGAGCTCCTCA
C16orf91_+_1470333.23-P1P2	C16orf91	CCACCTTGTTGGGGAGAGCGAGGCGGACCAGGTTTAAGAGCTAAGCTG	GGGAGAGCGAGGCGGACCAG
C16orf91_-_1470704.23-P1P2	C16orf91	CCACCTTGTTGGGGAGCTCACCCGGCCGCCGGTTTAAGAGCTAAGCTG	GGGAGCTCACCCGGCCGCCG
C16orf91_-_1470465.23-P1P2	C16orf91	CCACCTTGTTGGGGTATGGCCCACCGACCAGGTTTAAGAGCTAAGCTG	GGGTATGGCCCACCGACCAG
C19orf18_+_58485465.23-P1P2	C19orf18	CCACCTTGTTGGGGGCTGCCTCGAGATCCACGTTTAAGAGCTAAGCTG	GGGGCTGCCTCGAGATCCAC
C19orf18_-_58485480.23-P1P2	C19orf18	CCACCTTGTTGGGACTCACCCGTGGATCTCGGTTTAAGAGCTAAGCTG	GGACTCACCCGTGGATCTCG
C19orf18_+_58485484.23-P1P2	C19orf18	CCACCTTGTTGGCAGTTGCCTGGGATTCAAGGTTTAAGAGCTAAGCTG	GCAGTTGCCTGGGATTCAAG
C19orf18_-_58485499.23-P1P2	C19orf18	CCACCTTGTTGGAGGCAGCCCCTTGAATCCCGTTTAAGAGCTAAGCTG	GAGGCAGCCCCTTGAATCCC
C19orf18_-_58485668.23-P1P2	C19orf18	CCACCTTGTTGGCTGAGTCACATAAAACCAGGTTTAAGAGCTAAGCTG	GCTGAGTCACATAAAACCAG
C19orf24_+_1275614.23-P1P2	C19orf24	CCACCTTGTTGGAGGCCTCTTCGGCACCGCAGTTTAAGAGCTAAGCTG	GAGGCCTCTTCGGCACCGCA
C19orf24_-_1276081.23-P1P2	C19orf24	CCACCTTGTTGGGCGCCGCCTCTTAACTCGGGTTTAAGAGCTAAGCTG	GGCGCCGCCTCTTAACTCGG
C19orf24_+_1276063.23-P1P2	C19orf24	CCACCTTGTTGGTCACCCCCGAGTTAAGAGGGTTTAAGAGCTAAGCTG	GTCACCCCCGAGTTAAGAGG
C19orf24_-_1275518.23-P1P2	C19orf24	CCACCTTGTTGGTGACTGACAGCGCGCATAGGTTTAAGAGCTAAGCTG	GTGACTGACAGCGCGCATAG
C19orf24_+_1275546.23-P1P2	C19orf24	CCACCTTGTTGGtgcagcaCGCGCGGCCCCAGTTTAAGAGCTAAGCTG	GtgcagcaCGCGCGGCCCCA
C19orf38_+_10959097.23-P1P2	C19orf38	CCACCTTGTTGGCTCCTGTGAGGCCAGATCGGTTTAAGAGCTAAGCTG	GCTCCTGTGAGGCCAGATCG
C19orf38_-_10959545.23-P1P2	C19orf38	CCACCTTGTTGGAGCAGGAGGGTCTACCTAGGTTTAAGAGCTAAGCTG	GAGCAGGAGGGTCTACCTAG
C19orf38_-_10959125.23-P1P2	C19orf38	CCACCTTGTTGGCTGGCCTCACAGGAGGAGTGTTTAAGAGCTAAGCTG	GCTGGCCTCACAGGAGGAGT
C19orf38_-_10959558.23-P1P2	C19orf38	CCACCTTGTTGGACCTAGGGGGATATCAGTGGTTTAAGAGCTAAGCTG	GACCTAGGGGGATATCAGTG
C19orf38_-_10959522.23-P1P2	C19orf38	CCACCTTGTTGGGAAGGCTCCTTGAGTGCTGGTTTAAGAGCTAAGCTG	GGAAGGCTCCTTGAGTGCTG
C19orf77_-_3480119.23-P1P2	C19orf77	CCACCTTGTTGGGGAGGCCCGAGCTCAGAGTGTTTAAGAGCTAAGCTG	GGGAGGCCCGAGCTCAGAGT
C19orf77_-_3480083.23-P1P2	C19orf77	CCACCTTGTTGGAAGAGGCGGGGACTCAGATGTTTAAGAGCTAAGCTG	GAAGAGGCGGGGACTCAGAT
C19orf77_+_3480103.23-P1P2	C19orf77	CCACCTTGTTGGTCGGCCCCACTCTGAGCTCGTTTAAGAGCTAAGCTG	GTCGGCCCCACTCTGAGCTC
C19orf77_-_3480099.23-P1P2	C19orf77	CCACCTTGTTGGGATGGGGAGGGGCTTGTAAGTTTAAGAGCTAAGCTG	GGATGGGGAGGGGCTTGTAA
C19orf77_-_3480553.23-P1P2	C19orf77	CCACCTTGTTGGGCCCTGCCTCCCCGTGATAGTTTAAGAGCTAAGCTG	GGCCCTGCCTCCCCGTGATA
C1orf101_+_244624738.23-P1P2	C1orf101	CCACCTTGTTGGAGCAGCACGGCCACTTCCCGTTTAAGAGCTAAGCTG	GAGCAGCACGGCCACTTCCC
C1orf101_-_244624692.23-P1P2	C1orf101	CCACCTTGTTGGGAATGCGCGAGGCCTGGACGTTTAAGAGCTAAGCTG	GGAATGCGCGAGGCCTGGAC
C1orf101_+_244624729.23-P1P2	C1orf101	CCACCTTGTTGGGCCACTTCCCGGGCTGACAGTTTAAGAGCTAAGCTG	GGCCACTTCCCGGGCTGACA
C1orf101_+_244624786.23-P1P2	C1orf101	CCACCTTGTTGGGCGTCTCTCTACCTCCAAAGTTTAAGAGCTAAGCTG	GGCGTCTCTCTACCTCCAAA
C1orf101_-_244624749.23-P1P2	C1orf101	CCACCTTGTTGGGCCATGTCAGCCCGGGAAGGTTTAAGAGCTAAGCTG	GGCCATGTCAGCCCGGGAAG
C1orf159_+_1051446.23-P1P2	C1orf159	CCACCTTGTTGGTACGAAAGAGAAACCCGGAGTTTAAGAGCTAAGCTG	GTACGAAAGAGAAACCCGGA
C1orf159_+_1051438.23-P1P2	C1orf159	CCACCTTGTTGGAGAAACCCGGAGGGCGCCGGTTTAAGAGCTAAGCTG	GAGAAACCCGGAGGGCGCCG
C1orf159_+_1051101.23-P1P2	C1orf159	CCACCTTGTTGGggagggggtccctaaggagGTTTAAGAGCTAAGCTG	Gggagggggtccctaaggag
C1orf159_-_1051454.23-P1P2	C1orf159	CCACCTTGTTGGACTCACCCCGGCGCCCTCCGTTTAAGAGCTAAGCTG	GACTCACCCCGGCGCCCTCC
C1orf159_+_1051475.23-P1P2	C1orf159	CCACCTTGTTGGGCGCGGCGCCACCGCCTGAGTTTAAGAGCTAAGCTG	GGCGCGGCGCCACCGCCTGA
C1orf233_-_1535284.23-P1P2	C1orf233	CCACCTTGTTGGCTCGGGCAGCACCTTGTAGGTTTAAGAGCTAAGCTG	GCTCGGGCAGCACCTTGTAG
C1orf233_-_1535137.23-P1P2	C1orf233	CCACCTTGTTGGCCACTGCAGGAGGACGCTGGTTTAAGAGCTAAGCTG	GCCACTGCAGGAGGACGCTG
C1orf233_-_1535005.23-P1P2	C1orf233	CCACCTTGTTGGGTCGGGCAGCAGGTAGTCGGTTTAAGAGCTAAGCTG	GGTCGGGCAGCAGGTAGTCG
C1orf233_-_1535038.23-P1P2	C1orf233	CCACCTTGTTGGGAGGAGCACGCGCTCGCACGTTTAAGAGCTAAGCTG	GGAGGAGCACGCGCTCGCAC
C1orf233_-_1534969.23-P1P2	C1orf233	CCACCTTGTTGGCTGCAGGCACAGGCGGTAGGTTTAAGAGCTAAGCTG	GCTGCAGGCACAGGCGGTAG
C2orf82_-_233740584.23-P1	C2orf82	CCACCTTGTTGGGGCAACTTGCTTAACCTAGGTTTAAGAGCTAAGCTG	GGGCAACTTGCTTAACCTAG
C2orf82_+_233740577.23-P1	C2orf82	CCACCTTGTTGGGACGTCACCCCCCACCTCTGTTTAAGAGCTAAGCTG	GGACGTCACCCCCCACCTCT
C2orf82_-_233740591.23-P1	C2orf82	CCACCTTGTTGGTGCTTAACCTAGAGGTGGGGTTTAAGAGCTAAGCTG	GTGCTTAACCTAGAGGTGGG
C2orf82_+_233740947.23-P1	C2orf82	CCACCTTGTTGGGGCCCCAGCGACCCTGCGGGTTTAAGAGCTAAGCTG	GGGCCCCAGCGACCCTGCGG
C2orf82_+_233740630.23-P1	C2orf82	CCACCTTGTTGGCGTCTGCAAAGCCAAGGAGGTTTAAGAGCTAAGCTG	GCGTCTGCAAAGCCAAGGAG
C2orf82_+_233734986.23-P2	C2orf82	CCACCTTGTTGGACTGCGCTGGTTAACTTCAGTTTAAGAGCTAAGCTG	GACTGCGCTGGTTAACTTCA
C2orf82_-_233735368.23-P2	C2orf82	CCACCTTGTTGGAGAAGGAGGACAACTTGGGGTTTAAGAGCTAAGCTG	GAGAAGGAGGACAACTTGGG
C2orf82_+_233735150.23-P2	C2orf82	CCACCTTGTTGGGGCCCTGGGAGGCTAGTGGGTTTAAGAGCTAAGCTG	GGGCCCTGGGAGGCTAGTGG
C2orf82_+_233735008.23-P2	C2orf82	CCACCTTGTTGGCGGCGGGCGGGACGCACGGGTTTAAGAGCTAAGCTG	GCGGCGGGCGGGACGCACGG
C2orf82_-_233735406.23-P2	C2orf82	CCACCTTGTTGGTTGCTGTTGAGGGGGACATGTTTAAGAGCTAAGCTG	GTTGCTGTTGAGGGGGACAT
C3orf80_+_159943620.23-P1P2	C3orf80	CCACCTTGTTGGTGTCCAGGAAGGCGTGCAGGTTTAAGAGCTAAGCTG	GTGTCCAGGAAGGCGTGCAG
C3orf80_-_159943648.23-P1P2	C3orf80	CCACCTTGTTGGACGCCTTCCTGGACAACGTGTTTAAGAGCTAAGCTG	GACGCCTTCCTGGACAACGT
C3orf80_+_159944032.23-P1P2	C3orf80	CCACCTTGTTGGAGCCGCATGGACTCCTCGTGTTTAAGAGCTAAGCTG	GAGCCGCATGGACTCCTCGT
C3orf80_-_159944051.23-P1P2	C3orf80	CCACCTTGTTGGCACCTACGAGGAGTCCATGGTTTAAGAGCTAAGCTG	GCACCTACGAGGAGTCCATG
C3orf80_-_159944016.23-P1P2	C3orf80	CCACCTTGTTGGCAGCTGCCCAGCTACGAGGGTTTAAGAGCTAAGCTG	GCAGCTGCCCAGCTACGAGG
C5orf15_-_133304201.23-P1P2	C5orf15	CCACCTTGTTGGGGCCGCGCCAACCCCACAAGTTTAAGAGCTAAGCTG	GGGCCGCGCCAACCCCACAA
C5orf15_+_133304271.23-P1P2	C5orf15	CCACCTTGTTGGCTCCCAGCCGAGTCCGTTAGTTTAAGAGCTAAGCTG	GCTCCCAGCCGAGTCCGTTA
C5orf15_-_133304264.23-P1P2	C5orf15	CCACCTTGTTGGCCCCTCATCCTCTTCGGGAGTTTAAGAGCTAAGCTG	GCCCCTCATCCTCTTCGGGA
C5orf15_+_133304244.23-P1P2	C5orf15	CCACCTTGTTGGGCCGTCCCGAAGAGGATGAGTTTAAGAGCTAAGCTG	GGCCGTCCCGAAGAGGATGA
C5orf15_+_133304251.23-P1P2	C5orf15	CCACCTTGTTGGGGCCGCTGCCGTCCCGAAGGTTTAAGAGCTAAGCTG	GGGCCGCTGCCGTCCCGAAG
C6orf15_-_31080287.23-P1P2	C6orf15	CCACCTTGTTGGTGGGAGATGAAGACAGACCGTTTAAGAGCTAAGCTG	GTGGGAGATGAAGACAGACC
C6orf15_+_31079918.23-P1P2	C6orf15	CCACCTTGTTGGGACCCTAGGTCTAATGACTGTTTAAGAGCTAAGCTG	GGACCCTAGGTCTAATGACT
C6orf15_-_31079947.23-P1P2	C6orf15	CCACCTTGTTGGTTAGACCTAGGGTCCAGAGGTTTAAGAGCTAAGCTG	GTTAGACCTAGGGTCCAGAG
C6orf15_+_31079931.23-P1P2	C6orf15	CCACCTTGTTGGGCAGCCCGCTCTGGACCCTGTTTAAGAGCTAAGCTG	GGCAGCCCGCTCTGGACCCT
C6orf15_-_31080269.23-P1P2	C6orf15	CCACCTTGTTGGCATCACGGCCTCCATACCTGTTTAAGAGCTAAGCTG	GCATCACGGCCTCCATACCT
CA12_+_63674036.23-P1P2	CA12	CCACCTTGTTGGAAGCCAGGAGAGCGAAGGGGTTTAAGAGCTAAGCTG	GAAGCCAGGAGAGCGAAGGG
CA12_+_63674039.23-P1P2	CA12	CCACCTTGTTGGGGGAAGCCAGGAGAGCGAAGTTTAAGAGCTAAGCTG	GGGGAAGCCAGGAGAGCGAA
CA12_+_63673833.23-P1P2	CA12	CCACCTTGTTGGCCAGCCCGGCCCCAGTGAAGTTTAAGAGCTAAGCTG	GCCAGCCCGGCCCCAGTGAA
CA12_+_63673971.23-P1P2	CA12	CCACCTTGTTGGTGTGCAGCTGGAGAGCGAGGTTTAAGAGCTAAGCTG	GTGTGCAGCTGGAGAGCGAG
CA12_+_63674021.23-P1P2	CA12	CCACCTTGTTGGAGGGCGGACGTACTCGCCAGTTTAAGAGCTAAGCTG	GAGGGCGGACGTACTCGCCA
CA14_+_150230498.23-P1P2	CA14	CCACCTTGTTGGGTCCCAGGAAGGGGTGCAGGTTTAAGAGCTAAGCTG	GGTCCCAGGAAGGGGTGCAG
CA14_-_150230678.23-P1P2	CA14	CCACCTTGTTGGGGTGTGAAAGGAAGCCTAGGTTTAAGAGCTAAGCTG	GGGTGTGAAAGGAAGCCTAG
CA14_-_150230796.23-P1P2	CA14	CCACCTTGTTGGGGAGGTCGGGGAGAACTAGGTTTAAGAGCTAAGCTG	GGGAGGTCGGGGAGAACTAG
CA14_-_150230691.23-P1P2	CA14	CCACCTTGTTGGGCCTAGAGGCTGGAATAATGTTTAAGAGCTAAGCTG	GGCCTAGAGGCTGGAATAAT
CA14_+_150230512.23-P1P2	CA14	CCACCTTGTTGGGAGAACAACATAGTGTCCCGTTTAAGAGCTAAGCTG	GGAGAACAACATAGTGTCCC
CA4_-_58227740.23-P1P2	CA4	CCACCTTGTTGGGAGTTGGGAGTCCCTGATAGTTTAAGAGCTAAGCTG	GGAGTTGGGAGTCCCTGATA
CA4_-_58227726.23-P1P2	CA4	CCACCTTGTTGGTGGCCCGGCGAGACGAGTTGTTTAAGAGCTAAGCTG	GTGGCCCGGCGAGACGAGTT
CA4_-_58227374.23-P1P2	CA4	CCACCTTGTTGGTGCGCGACCCCCGGCTCAGGTTTAAGAGCTAAGCTG	GTGCGCGACCCCCGGCTCAG
CA4_+_58227730.23-P1P2	CA4	CCACCTTGTTGGcTGAGACGCATCCTTATCAGTTTAAGAGCTAAGCTG	GcTGAGACGCATCCTTATCA
CA4_-_58227431.23-P1P2	CA4	CCACCTTGTTGGGCGCTCCTGGCCCTCTCCGGTTTAAGAGCTAAGCTG	GGCGCTCCTGGCCCTCTCCG
CACHD1_+_64935988.23-P1P2	CACHD1	CCACCTTGTTGGAGGCGGCGGCGAGGACTGAGTTTAAGAGCTAAGCTG	GAGGCGGCGGCGAGGACTGA
CACHD1_+_64935985.23-P1P2	CACHD1	CCACCTTGTTGGCGGCGGCGAGGACTGACGGGTTTAAGAGCTAAGCTG	GCGGCGGCGAGGACTGACGG
CACHD1_+_64935917.23-P1P2	CACHD1	CCACCTTGTTGGCACCCGAGCGAGGAGGGAAGTTTAAGAGCTAAGCTG	GCACCCGAGCGAGGAGGGAA
CACHD1_+_64935922.23-P1P2	CACHD1	CCACCTTGTTGGGCAGCCACCCGAGCGAGGAGTTTAAGAGCTAAGCTG	GGCAGCCACCCGAGCGAGGA
CACHD1_+_64935976.23-P1P2	CACHD1	CCACCTTGTTGGGGACTGACGGCGGCCCCCGGTTTAAGAGCTAAGCTG	GGGACTGACGGCGGCCCCCG
CACNA2D1_-_82073246.23-P1P2	CACNA2D1	CCACCTTGTTGGAGAGACTTGTGGAAGCGAGGTTTAAGAGCTAAGCTG	GAGAGACTTGTGGAAGCGAG
CACNA2D1_-_82073236.23-P1P2	CACNA2D1	CCACCTTGTTGGTGGCAGGCAGAGAGACTTGGTTTAAGAGCTAAGCTG	GTGGCAGGCAGAGAGACTTG
CACNA2D1_-_82072843.23-P1P2	CACNA2D1	CCACCTTGTTGGGAGCGGCGCTGGAAACCGCGTTTAAGAGCTAAGCTG	GGAGCGGCGCTGGAAACCGC
CACNA2D1_-_82072818.23-P1P2	CACNA2D1	CCACCTTGTTGGCCCCTCCCTGCCCAAGCGGGTTTAAGAGCTAAGCTG	GCCCCTCCCTGCCCAAGCGG
CACNA2D1_-_82073256.23-P1P2	CACNA2D1	CCACCTTGTTGGGGAAGCGAGAGGCTCCGTCGTTTAAGAGCTAAGCTG	GGGAAGCGAGAGGCTCCGTC
CACNA2D2_-_50540709.23-P1P2	CACNA2D2	CCACCTTGTTGGcggcgagcagcggtagaagGTTTAAGAGCTAAGCTG	Gcggcgagcagcggtagaag
CACNA2D2_-_50540593.23-P1P2	CACNA2D2	CCACCTTGTTGGAAGGAGTAGCGCGGACCGGGTTTAAGAGCTAAGCTG	GAAGGAGTAGCGCGGACCGG
CACNA2D2_-_50540994.23-P1P2	CACNA2D2	CCACCTTGTTGGTCTCCGCGAGGGGCCTCCGGTTTAAGAGCTAAGCTG	GTCTCCGCGAGGGGCCTCCG
CACNA2D2_+_50540967.23-P1P2	CACNA2D2	CCACCTTGTTGGAGGCCCCTCGCGGAGAAGGGTTTAAGAGCTAAGCTG	GAGGCCCCTCGCGGAGAAGG
CACNA2D2_-_50541020.23-P1P2	CACNA2D2	CCACCTTGTTGGACGGGCCGCAGCGCCTCTGGTTTAAGAGCTAAGCTG	GACGGGCCGCAGCGCCTCTG
CACNA2D3_+_54156980.23-P1P2	CACNA2D3	CCACCTTGTTGGCCCGAAAGGCAGGTGCGAGGTTTAAGAGCTAAGCTG	GCCCGAAAGGCAGGTGCGAG
CACNA2D3_-_54157094.23-P1P2	CACNA2D3	CCACCTTGTTGGAGAGGCTCACCTCAAGTGAGTTTAAGAGCTAAGCTG	GAGAGGCTCACCTCAAGTGA
CACNA2D3_+_54157047.23-P1P2	CACNA2D3	CCACCTTGTTGGATCTCACTCGGCAACCTGCGTTTAAGAGCTAAGCTG	GATCTCACTCGGCAACCTGC
CACNA2D3_+_54156594.23-P1P2	CACNA2D3	CCACCTTGTTGGTCGCGCGCCCGGCTCACTTGTTTAAGAGCTAAGCTG	GTCGCGCGCCCGGCTCACTT
CACNA2D3_+_54157004.23-P1P2	CACNA2D3	CCACCTTGTTGGCCGGCCTCGCCGCCCGACGGTTTAAGAGCTAAGCTG	GCCGGCCTCGCCGCCCGACG
CACNA2D4_-_2027822.23-ENST00000382722.5	CACNA2D4	CCACCTTGTTGGCCTCGGAGACAGGGACTGGGTTTAAGAGCTAAGCTG	GCCTCGGAGACAGGGACTGG
CACNA2D4_-_2027814.23-ENST00000382722.5	CACNA2D4	CCACCTTGTTGGCAAGCAGGCCTCGGAGACAGTTTAAGAGCTAAGCTG	GCAAGCAGGCCTCGGAGACA
CACNA2D4_-_2027366.23-ENST00000382722.5	CACNA2D4	CCACCTTGTTGGCCCAGCCCGGGAAGAAAGTGTTTAAGAGCTAAGCTG	GCCCAGCCCGGGAAGAAAGT
CACNA2D4_+_2027783.23-ENST00000382722.5	CACNA2D4	CCACCTTGTTGGGAGGCCTGCTTGCTAGGTGGTTTAAGAGCTAAGCTG	GGAGGCCTGCTTGCTAGGTG
CACNA2D4_+_2027416.23-ENST00000382722.5	CACNA2D4	CCACCTTGTTGGGGACAGGCCAAGATTCCTCGTTTAAGAGCTAAGCTG	GGGACAGGCCAAGATTCCTC
CACNA2D4_-_2027822.23-ENST00000586184.1	CACNA2D4	CCACCTTGTTGGCCTCGGAGACAGGGACTGGGTTTAAGAGCTAAGCTG	GCCTCGGAGACAGGGACTGG
CACNA2D4_-_2027366.23-ENST00000586184.1	CACNA2D4	CCACCTTGTTGGCCCAGCCCGGGAAGAAAGTGTTTAAGAGCTAAGCTG	GCCCAGCCCGGGAAGAAAGT
CACNA2D4_-_2027814.23-ENST00000586184.1	CACNA2D4	CCACCTTGTTGGCAAGCAGGCCTCGGAGACAGTTTAAGAGCTAAGCTG	GCAAGCAGGCCTCGGAGACA
CACNA2D4_+_2027416.23-ENST00000586184.1	CACNA2D4	CCACCTTGTTGGGGACAGGCCAAGATTCCTCGTTTAAGAGCTAAGCTG	GGGACAGGCCAAGATTCCTC
CACNA2D4_+_2027783.23-ENST00000586184.1	CACNA2D4	CCACCTTGTTGGGAGGCCTGCTTGCTAGGTGGTTTAAGAGCTAAGCTG	GGAGGCCTGCTTGCTAGGTG
CADM1_+_115375108.23-P1P2	CADM1	CCACCTTGTTGGCTGAGGCAGGTGCCCGACAGTTTAAGAGCTAAGCTG	GCTGAGGCAGGTGCCCGACA
CADM1_+_115375124.23-P1P2	CADM1	CCACCTTGTTGGAGCCAACGCCGCCAGTCTGGTTTAAGAGCTAAGCTG	GAGCCAACGCCGCCAGTCTG
CADM1_-_115375117.23-P1P2	CADM1	CCACCTTGTTGGGCACTACACTCGCCATGTCGTTTAAGAGCTAAGCTG	GGCACTACACTCGCCATGTC
CADM1_+_115375069.23-P1P2	CADM1	CCACCTTGTTGGAGCGGATCCCAGTGTgcggGTTTAAGAGCTAAGCTG	GAGCGGATCCCAGTGTgcgg
CADM1_+_115375063.23-P1P2	CADM1	CCACCTTGTTGGTCCCAGTGTgcggcggcagGTTTAAGAGCTAAGCTG	GTCCCAGTGTgcggcggcag
CADM2_+_85008120.23-P1P2	CADM2	CCACCTTGTTGGTACGAAGCACCAGACACAAGTTTAAGAGCTAAGCTG	GTACGAAGCACCAGACACAA
CADM2_+_85008585.23-P1P2	CADM2	CCACCTTGTTGGGGATCGGCGGCAGCAGAAGGTTTAAGAGCTAAGCTG	GGGATCGGCGGCAGCAGAAG
CADM2_-_85008679.23-P1P2	CADM2	CCACCTTGTTGGGCCGGGAGGAGGACACCAGGTTTAAGAGCTAAGCTG	GGCCGGGAGGAGGACACCAG
CADM2_+_85008360.23-P1P2	CADM2	CCACCTTGTTGGGGCGAGGGCTGCAAGGAGTGTTTAAGAGCTAAGCTG	GGGCGAGGGCTGCAAGGAGT
CADM2_+_85008106.23-P1P2	CADM2	CCACCTTGTTGGCACAAGGGCAAGCTCAGAGGTTTAAGAGCTAAGCTG	GCACAAGGGCAAGCTCAGAG
CADM4_+_44143915.23-P1P2	CADM4	CCACCTTGTTGGCCGGGCCCGGCGCTTCCAGGTTTAAGAGCTAAGCTG	GCCGGGCCCGGCGCTTCCAG
CADM4_-_44143506.23-P1P2	CADM4	CCACCTTGTTGGACTGAGGGATAGAGGACAAGTTTAAGAGCTAAGCTG	GACTGAGGGATAGAGGACAA
CADM4_-_44143533.23-P1P2	CADM4	CCACCTTGTTGGGGACGAGGAGCCAGACGGGGTTTAAGAGCTAAGCTG	GGGACGAGGAGCCAGACGGG
CADM4_-_44143570.23-P1P2	CADM4	CCACCTTGTTGGGACAGAGGGACGCAGAGACGTTTAAGAGCTAAGCTG	GGACAGAGGGACGCAGAGAC
CADM4_-_44143557.23-P1P2	CADM4	CCACCTTGTTGGTCAGAGACGGGCGGACAGAGTTTAAGAGCTAAGCTG	GTCAGAGACGGGCGGACAGA
CALCR_+_93203982.23-P1P2	CALCR	CCACCTTGTTGGGGTGAGCCTCCTGGACTCTGTTTAAGAGCTAAGCTG	GGGTGAGCCTCCTGGACTCT
CALCR_+_93203789.23-P1P2	CALCR	CCACCTTGTTGGAGCCCACCAGCGTCTGGGTGTTTAAGAGCTAAGCTG	GAGCCCACCAGCGTCTGGGT
CALCR_-_93203808.23-P1P2	CALCR	CCACCTTGTTGGAGCCCACCCAGACGCTGGTGTTTAAGAGCTAAGCTG	GAGCCCACCCAGACGCTGGT
CALCR_+_93204017.23-P1P2	CALCR	CCACCTTGTTGGTTCACAGCTGGGAGAGCGCGTTTAAGAGCTAAGCTG	GTTCACAGCTGGGAGAGCGC
CALCR_+_93203990.23-P1P2	CALCR	CCACCTTGTTGGGCCGGGAAGGTGAGCCTCCGTTTAAGAGCTAAGCTG	GGCCGGGAAGGTGAGCCTCC
CALCRL_-_188312944.23-P1P2	CALCRL	CCACCTTGTTGGTTGATGGTCCTAAAGCAGGGTTTAAGAGCTAAGCTG	GTTGATGGTCCTAAAGCAGG
CALCRL_-_188312929.23-P1P2	CALCRL	CCACCTTGTTGGTTCAGTTAGCAGAGCTTGAGTTTAAGAGCTAAGCTG	GTTCAGTTAGCAGAGCTTGA
CALCRL_-_188312901.23-P1P2	CALCRL	CCACCTTGTTGGGCAATGTGATCCTGCAATTGTTTAAGAGCTAAGCTG	GGCAATGTGATCCTGCAATT
CALCRL_-_188312863.23-P1P2	CALCRL	CCACCTTGTTGGATTTACCCACAAGCAAGGTGTTTAAGAGCTAAGCTG	GATTTACCCACAAGCAAGGT
CALCRL_-_188312618.23-P1P2	CALCRL	CCACCTTGTTGGGTATTCATGTTGGGGTAGTGTTTAAGAGCTAAGCTG	GGTATTCATGTTGGGGTAGT
CASD1_+_94139518.23-P1P2	CASD1	CCACCTTGTTGGGGCCCGCTCACCTCGGTAGGTTTAAGAGCTAAGCTG	GGGCCCGCTCACCTCGGTAG
CASD1_-_94139167.23-P1P2	CASD1	CCACCTTGTTGGAACCGGCACGGCGGAGCAGGTTTAAGAGCTAAGCTG	GAACCGGCACGGCGGAGCAG
CASD1_-_94139215.23-P1P2	CASD1	CCACCTTGTTGGGTCGGCCGCGGCCGAGGAGGTTTAAGAGCTAAGCTG	GGTCGGCCGCGGCCGAGGAG
CASD1_-_94139865.23-P1P2	CASD1	CCACCTTGTTGGGGGAGACGCTCCAGATCAGGTTTAAGAGCTAAGCTG	GGGGAGACGCTCCAGATCAG
CASD1_+_94139338.23-P1P2	CASD1	CCACCTTGTTGGGGAAAGGGGCGCCGCACAGGTTTAAGAGCTAAGCTG	GGGAAAGGGGCGCCGCACAG
CASR_-_121902759.23-P1P2	CASR	CCACCTTGTTGGCCCTCGGCACAGAGAACGTGTTTAAGAGCTAAGCTG	GCCCTCGGCACAGAGAACGT
CASR_-_121903029.23-P1P2	CASR	CCACCTTGTTGGAAGGAACCGGGACTAACTGGTTTAAGAGCTAAGCTG	GAAGGAACCGGGACTAACTG
CASR_-_121902593.23-P1P2	CASR	CCACCTTGTTGGcgcgcaggagagtggaaggGTTTAAGAGCTAAGCTG	Gcgcgcaggagagtggaagg
CASR_+_121902954.23-P1P2	CASR	CCACCTTGTTGGGACTCTTCAGGGTCGCTGAGTTTAAGAGCTAAGCTG	GGACTCTTCAGGGTCGCTGA
CASR_+_121902901.23-P1P2	CASR	CCACCTTGTTGGGGCTCGGGTCCCCAGCAGAGTTTAAGAGCTAAGCTG	GGGCTCGGGTCCCCAGCAGA
CATSPERG_-_38827112.23-P1P2	CATSPERG	CCACCTTGTTGGCAGGAGCGGAAGCAGAGTGGTTTAAGAGCTAAGCTG	GCAGGAGCGGAAGCAGAGTG
CATSPERG_-_38827084.23-P1P2	CATSPERG	CCACCTTGTTGGAGACCAAGTGGAGGAGTAGGTTTAAGAGCTAAGCTG	GAGACCAAGTGGAGGAGTAG
CATSPERG_+_38826543.23-P1P2	CATSPERG	CCACCTTGTTGGGCATCCCCCCGCCCCTGGAGTTTAAGAGCTAAGCTG	GGCATCCCCCCGCCCCTGGA
CATSPERG_-_38827584.23-P1P2	CATSPERG	CCACCTTGTTGGCGATACCCACGAGGGTcggGTTTAAGAGCTAAGCTG	GCGATACCCACGAGGGTcgg
CATSPERG_-_38826591.23-P1P2	CATSPERG	CCACCTTGTTGGACGGGGAGGAACTAggaagGTTTAAGAGCTAAGCTG	GACGGGGAGGAACTAggaag
CCDC107_+_35658450.23-P1P2	CCDC107	CCACCTTGTTGGCCGGAGGTCGGGATTGGCGGTTTAAGAGCTAAGCTG	GCCGGAGGTCGGGATTGGCG
CCDC107_-_35658369.23-P1P2	CCDC107	CCACCTTGTTGGGCCCGATCCCTCCACCCGTGTTTAAGAGCTAAGCTG	GGCCCGATCCCTCCACCCGT
CCDC107_+_35658326.23-P1P2	CCDC107	CCACCTTGTTGGGGGCGGTGCCGAAGCGGTCGTTTAAGAGCTAAGCTG	GGGGCGGTGCCGAAGCGGTC
CCDC107_-_35658494.23-P1P2	CCDC107	CCACCTTGTTGGCACACCCAGGTACCAGCTAGTTTAAGAGCTAAGCTG	GCACACCCAGGTACCAGCTA
CCDC107_-_35658379.23-P1P2	CCDC107	CCACCTTGTTGGTCCACCCGTGGGCCGGCAAGTTTAAGAGCTAAGCTG	GTCCACCCGTGGGCCGGCAA
CCDC47_+_61850884.23-P1P2	CCDC47	CCACCTTGTTGGGGTTCTGGCTGCGTCCTAGGTTTAAGAGCTAAGCTG	GGGTTCTGGCTGCGTCCTAG
CCDC47_+_61850946.23-P1P2	CCDC47	CCACCTTGTTGGTCGCATTCTACGTAACGGAGTTTAAGAGCTAAGCTG	GTCGCATTCTACGTAACGGA
CCDC47_+_61850875.23-P1P2	CCDC47	CCACCTTGTTGGTGCGTCCTAGAGGCATCCGGTTTAAGAGCTAAGCTG	GTGCGTCCTAGAGGCATCCG
CCDC47_+_61850904.23-P1P2	CCDC47	CCACCTTGTTGGGCGCGGCGTGACTGAGCTAGTTTAAGAGCTAAGCTG	GGCGCGGCGTGACTGAGCTA
CCDC47_+_61850925.23-P1P2	CCDC47	CCACCTTGTTGGGCGGAGGCTACGTGAAGAGGTTTAAGAGCTAAGCTG	GGCGGAGGCTACGTGAAGAG
CCDC80_+_112359509.23-P1P2	CCDC80	CCACCTTGTTGGCTGTGTCAGCACAAGGGACGTTTAAGAGCTAAGCTG	GCTGTGTCAGCACAAGGGAC
CCDC80_-_112359897.23-P1P2	CCDC80	CCACCTTGTTGGCAGCAGCCACTGGAAATCAGTTTAAGAGCTAAGCTG	GCAGCAGCCACTGGAAATCA
CCDC80_-_112359977.23-P1P2	CCDC80	CCACCTTGTTGGGTTCAGAGTGGACTCAGTGGTTTAAGAGCTAAGCTG	GGTTCAGAGTGGACTCAGTG
CCDC80_+_112359939.23-P1P2	CCDC80	CCACCTTGTTGGTGAACGTGCTAAAATGGGAGTTTAAGAGCTAAGCTG	GTGAACGTGCTAAAATGGGA
CCDC80_+_112359514.23-P1P2	CCDC80	CCACCTTGTTGGACGTCCTGTGTCAGCACAAGTTTAAGAGCTAAGCTG	GACGTCCTGTGTCAGCACAA
CCR7_-_38721690.23-P1	CCR7	CCACCTTGTTGGCTGGGCGGTAAAACCACACGTTTAAGAGCTAAGCTG	GCTGGGCGGTAAAACCACAC
CCR7_-_38721673.23-P1	CCR7	CCACCTTGTTGGCAGGTCCATGACGCTCTCTGTTTAAGAGCTAAGCTG	GCAGGTCCATGACGCTCTCT
CCR7_-_38721256.23-P1	CCR7	CCACCTTGTTGGAAAGGTCCTAAGCTCTCTAGTTTAAGAGCTAAGCTG	GAAAGGTCCTAAGCTCTCTA
CCR7_-_38721727.23-P1	CCR7	CCACCTTGTTGGCTCGCACTACCCCTGTCTGGTTTAAGAGCTAAGCTG	GCTCGCACTACCCCTGTCTG
CCR7_-_38721676.23-P1	CCR7	CCACCTTGTTGGGTCCATGACGCTCTCTGGGGTTTAAGAGCTAAGCTG	GGTCCATGACGCTCTCTGGG
CCR7_+_38717072.23-P2	CCR7	CCACCTTGTTGGGAGCGCAGGCTGGGAACGAGTTTAAGAGCTAAGCTG	GGAGCGCAGGCTGGGAACGA
CCR7_+_38716713.23-P2	CCR7	CCACCTTGTTGGACCTGGGTGCCATGCAGGGGTTTAAGAGCTAAGCTG	GACCTGGGTGCCATGCAGGG
CCR7_+_38716976.23-P2	CCR7	CCACCTTGTTGGCTGCCAGGCCAAGCATCAGGTTTAAGAGCTAAGCTG	GCTGCCAGGCCAAGCATCAG
CCR7_+_38716933.23-P2	CCR7	CCACCTTGTTGGGAGCCCCTGAGGATTTAGGGTTTAAGAGCTAAGCTG	GGAGCCCCTGAGGATTTAGG
CCR7_-_38716733.23-P2	CCR7	CCACCTTGTTGGGCCTCCCTGCATGGCACCCGTTTAAGAGCTAAGCTG	GGCCTCCCTGCATGGCACCC
CD101_+_117544643.23-P1P2	CD101	CCACCTTGTTGGCTGGAACTCAAGGATGTCTGTTTAAGAGCTAAGCTG	GCTGGAACTCAAGGATGTCT
CD101_+_117544387.23-P1P2	CD101	CCACCTTGTTGGTAGTGTCACTAACATTCAGGTTTAAGAGCTAAGCTG	GTAGTGTCACTAACATTCAG
CD101_-_117544442.23-P1P2	CD101	CCACCTTGTTGGAGGACTGTGCTGGCCCAAAGTTTAAGAGCTAAGCTG	GAGGACTGTGCTGGCCCAAA
CD101_-_117544433.23-P1P2	CD101	CCACCTTGTTGGGGACGAAAAAGGACTGTGCGTTTAAGAGCTAAGCTG	GGGACGAAAAAGGACTGTGC
CD101_-_117544423.23-P1P2	CD101	CCACCTTGTTGGGACACTATTGGGACGAAAAGTTTAAGAGCTAAGCTG	GGACACTATTGGGACGAAAA
CD109_+_74405966.23-P1P2	CD109	CCACCTTGTTGGGTGCACACGCAGAGGAGGTGTTTAAGAGCTAAGCTG	GGTGCACACGCAGAGGAGGT
CD109_+_74405973.23-P1P2	CD109	CCACCTTGTTGGCGCGGCGGTGCACACGCAGGTTTAAGAGCTAAGCTG	GCGCGGCGGTGCACACGCAG
CD109_+_74405970.23-P1P2	CD109	CCACCTTGTTGGGGCGGTGCACACGCAGAGGGTTTAAGAGCTAAGCTG	GGGCGGTGCACACGCAGAGG
CD109_-_74405904.23-P1P2	CD109	CCACCTTGTTGGCGGTGCCCGCGAACTTCCCGTTTAAGAGCTAAGCTG	GCGGTGCCCGCGAACTTCCC
CD109_+_74405946.23-P1P2	CD109	CCACCTTGTTGGGGCGGCGGTCAGGAGCGGTGTTTAAGAGCTAAGCTG	GGGCGGCGGTCAGGAGCGGT
CD14_-_140012693.23-P1P2	CD14	CCACCTTGTTGGGAACCTCTGAGCTCCGGACGTTTAAGAGCTAAGCTG	GGAACCTCTGAGCTCCGGAC
CD14_+_140012675.23-P1P2	CD14	CCACCTTGTTGGGAGCCTGTCCGGAGCTCAGGTTTAAGAGCTAAGCTG	GGAGCCTGTCCGGAGCTCAG
CD14_-_140012531.23-P1P2	CD14	CCACCTTGTTGGTCGCAGAGACGTGCACCAGGTTTAAGAGCTAAGCTG	GTCGCAGAGACGTGCACCAG
CD14_-_140012729.23-P1P2	CD14	CCACCTTGTTGGTAGCTTCTTTCCTACACAGGTTTAAGAGCTAAGCTG	GTAGCTTCTTTCCTACACAG
CD14_+_140012278.23-P1P2	CD14	CCACCTTGTTGGGCGTGCGGCGGCTCACAGTGTTTAAGAGCTAAGCTG	GGCGTGCGGCGGCTCACAGT
CD160_+_145715158.23-P1P2	CD160	CCACCTTGTTGGCCCTGTGAGGCACCTCCGGGTTTAAGAGCTAAGCTG	GCCCTGTGAGGCACCTCCGG
CD160_+_145715191.23-P1P2	CD160	CCACCTTGTTGGCAAGCCGGGAGGTGCCACGGTTTAAGAGCTAAGCTG	GCAAGCCGGGAGGTGCCACG
CD160_-_145715208.23-P1P2	CD160	CCACCTTGTTGGCAAGCCCCGTGGCACCTCCGTTTAAGAGCTAAGCTG	GCAAGCCCCGTGGCACCTCC
CD160_-_145715198.23-P1P2	CD160	CCACCTTGTTGGGGGCCAGCTCCAAGCCCCGGTTTAAGAGCTAAGCTG	GGGGCCAGCTCCAAGCCCCG
CD160_+_145715161.23-P1P2	CD160	CCACCTTGTTGGTGGCCCTGTGAGGCACCTCGTTTAAGAGCTAAGCTG	GTGGCCCTGTGAGGCACCTC
CD163L1_+_7596517.23-ENST00000313599.3,ENST00000416109.2	CD163L1	CCACCTTGTTGGAGAGTAGCAGCAATATTGGGTTTAAGAGCTAAGCTG	GAGAGTAGCAGCAATATTGG
CD163L1_+_7596699.23-ENST00000313599.3,ENST00000416109.2	CD163L1	CCACCTTGTTGGGATGCTGCCTCAAAACTCGGTTTAAGAGCTAAGCTG	GGATGCTGCCTCAAAACTCG
CD163L1_+_7596686.23-ENST00000313599.3,ENST00000416109.2	CD163L1	CCACCTTGTTGGAACTCGTGGCATATTGGTAGTTTAAGAGCTAAGCTG	GAACTCGTGGCATATTGGTA
CD163L1_+_7596691.23-ENST00000313599.3,ENST00000416109.2	CD163L1	CCACCTTGTTGGCTCAAAACTCGTGGCATATGTTTAAGAGCTAAGCTG	GCTCAAAACTCGTGGCATAT
CD163L1_+_7596646.23-ENST00000313599.3,ENST00000416109.2	CD163L1	CCACCTTGTTGGCTGCCATTTGGGAGATGGTGTTTAAGAGCTAAGCTG	GCTGCCATTTGGGAGATGGT
CD164L2_-_27709672.23-P1P2	CD164L2	CCACCTTGTTGGCAGCTGGGCACATAGGAGGGTTTAAGAGCTAAGCTG	GCAGCTGGGCACATAGGAGG
CD164L2_+_27709722.23-P1P2	CD164L2	CCACCTTGTTGGCCACCCCGCGAGCCCATGGGTTTAAGAGCTAAGCTG	GCCACCCCGCGAGCCCATGG
CD164L2_+_27709368.23-P1P2	CD164L2	CCACCTTGTTGGCGGGTGTATGCAAAGGGAGGTTTAAGAGCTAAGCTG	GCGGGTGTATGCAAAGGGAG
CD164L2_+_27709395.23-P1P2	CD164L2	CCACCTTGTTGGGGTGGCTCCAACTGAATCTGTTTAAGAGCTAAGCTG	GGGTGGCTCCAACTGAATCT
CD164L2_+_27709374.23-P1P2	CD164L2	CCACCTTGTTGGGAACCCCGGGTGTATGCAAGTTTAAGAGCTAAGCTG	GGAACCCCGGGTGTATGCAA
CD177_+_43858283.23-P1P2	CD177	CCACCTTGTTGGGGAGGGAGACGCTGCTACAGTTTAAGAGCTAAGCTG	GGGAGGGAGACGCTGCTACA
CD177_+_43858269.23-P1P2	CD177	CCACCTTGTTGGCTACACGGCGTAGGCTGAGGTTTAAGAGCTAAGCTG	GCTACACGGCGTAGGCTGAG
CD177_+_43858250.23-P1P2	CD177	CCACCTTGTTGGAGGCTGGAAAGGGGATCACGTTTAAGAGCTAAGCTG	GAGGCTGGAAAGGGGATCAC
CD177_+_43857904.23-P1P2	CD177	CCACCTTGTTGGTCACTCACCTGGCAGTGGGGTTTAAGAGCTAAGCTG	GTCACTCACCTGGCAGTGGG
CD177_+_43857888.23-P1P2	CD177	CCACCTTGTTGGGGGAGGATGAACCCCAGGAGTTTAAGAGCTAAGCTG	GGGGAGGATGAACCCCAGGA
CD180_+_66492191.23-P1P2	CD180	CCACCTTGTTGGCTGCCAGGGGATCATCTGGGTTTAAGAGCTAAGCTG	GCTGCCAGGGGATCATCTGG
CD180_-_66492563.23-P1P2	CD180	CCACCTTGTTGGGGCAATTTGGCAGCCAGAGGTTTAAGAGCTAAGCTG	GGGCAATTTGGCAGCCAGAG
CD180_-_66492584.23-P1P2	CD180	CCACCTTGTTGGGTACTCAGAAGGGTGATCTGTTTAAGAGCTAAGCTG	GGTACTCAGAAGGGTGATCT
CD180_-_66492574.23-P1P2	CD180	CCACCTTGTTGGAGCCAGAGAGGTACTCAGAGTTTAAGAGCTAAGCTG	GAGCCAGAGAGGTACTCAGA
CD180_+_66492555.23-P1P2	CD180	CCACCTTGTTGGACCCTTCTGAGTACCTCTCGTTTAAGAGCTAAGCTG	GACCCTTCTGAGTACCTCTC
CD19_+_28943301.23-P1P2	CD19	CCACCTTGTTGGATGGTGGTCAGACTCTCCGGTTTAAGAGCTAAGCTG	GATGGTGGTCAGACTCTCCG
CD19_+_28943691.23-P1P2	CD19	CCACCTTGTTGGGCCATCTGAGGTCCCCTTGGTTTAAGAGCTAAGCTG	GGCCATCTGAGGTCCCCTTG
CD19_+_28943378.23-P1P2	CD19	CCACCTTGTTGGTCACCACTAGAGGTTCCTCGTTTAAGAGCTAAGCTG	GTCACCACTAGAGGTTCCTC
CD19_-_28943699.23-P1P2	CD19	CCACCTTGTTGGCTGTGCTGCAGTGCCTCAAGTTTAAGAGCTAAGCTG	GCTGTGCTGCAGTGCCTCAA
CD19_+_28943714.23-P1P2	CD19	CCACCTTGTTGGGACCAGGTCAGCTGCTGAGGTTTAAGAGCTAAGCTG	GGACCAGGTCAGCTGCTGAG
CD1A_-_158224302.23-P1P2	CD1A	CCACCTTGTTGGAGACTGAGTAGGCATCTCAGTTTAAGAGCTAAGCTG	GAGACTGAGTAGGCATCTCA
CD1A_+_158224667.23-P1P2	CD1A	CCACCTTGTTGGGAGTCATGGATAGTCAGAAGTTTAAGAGCTAAGCTG	GGAGTCATGGATAGTCAGAA
CD1A_-_158224724.23-P1P2	CD1A	CCACCTTGTTGGCTTATGAAGGTGGTTGATAGTTTAAGAGCTAAGCTG	GCTTATGAAGGTGGTTGATA
CD1A_-_158224222.23-P1P2	CD1A	CCACCTTGTTGGGGGAAGGTGAATAAGTTGGGTTTAAGAGCTAAGCTG	GGGGAAGGTGAATAAGTTGG
CD1A_-_158224219.23-P1P2	CD1A	CCACCTTGTTGGTAGGGGAAGGTGAATAAGTGTTTAAGAGCTAAGCTG	GTAGGGGAAGGTGAATAAGT
CD1B_+_158301288.23-P1P2	CD1B	CCACCTTGTTGGGAGAGAAGAAGTCACTACAGTTTAAGAGCTAAGCTG	GGAGAGAAGAAGTCACTACA
CD1B_-_158301240.23-P1P2	CD1B	CCACCTTGTTGGGGGAGATGCAACTTCTTACGTTTAAGAGCTAAGCTG	GGGGAGATGCAACTTCTTAC
CD1B_+_158300776.23-P1P2	CD1B	CCACCTTGTTGGGTACCTGGGCACAAACTCAGTTTAAGAGCTAAGCTG	GGTACCTGGGCACAAACTCA
CD1B_+_158301136.23-P1P2	CD1B	CCACCTTGTTGGAACATGGTAAGAGTCACTCGTTTAAGAGCTAAGCTG	GAACATGGTAAGAGTCACTC
CD1B_-_158301200.23-P1P2	CD1B	CCACCTTGTTGGGAACAGCTAACAGTTGAAAGTTTAAGAGCTAAGCTG	GGAACAGCTAACAGTTGAAA
CD1C_-_158259786.23-P1P2	CD1C	CCACCTTGTTGGAGTCAGAATATAGGTACAGGTTTAAGAGCTAAGCTG	GAGTCAGAATATAGGTACAG
CD1C_+_158260248.23-P1P2	CD1C	CCACCTTGTTGGAGTGGTGCGTGGCATTGAAGTTTAAGAGCTAAGCTG	GAGTGGTGCGTGGCATTGAA
CD1C_-_158260238.23-P1P2	CD1C	CCACCTTGTTGGATGACACGCAAGGTCCAGAGTTTAAGAGCTAAGCTG	GATGACACGCAAGGTCCAGA
CD1C_-_158260319.23-P1P2	CD1C	CCACCTTGTTGGAGATAAGATGGAGCTTAGTGTTTAAGAGCTAAGCTG	GAGATAAGATGGAGCTTAGT
CD1C_+_158260010.23-P1P2	CD1C	CCACCTTGTTGGGGAGACAGGTATGCTCAGAGTTTAAGAGCTAAGCTG	GGGAGACAGGTATGCTCAGA
CD1D_-_158150739.23-P1P2	CD1D	CCACCTTGTTGGGGCAGAAGCAGCAAACCGCGTTTAAGAGCTAAGCTG	GGGCAGAAGCAGCAAACCGC
CD1D_-_158150719.23-P1P2	CD1D	CCACCTTGTTGGTAAGGGCGAGGGCGCCCTTGTTTAAGAGCTAAGCTG	GTAAGGGCGAGGGCGCCCTT
CD1D_-_158150703.23-P1P2	CD1D	CCACCTTGTTGGTTGCAGCTCGCACAGCTAAGTTTAAGAGCTAAGCTG	GTTGCAGCTCGCACAGCTAA
CD1D_+_158150733.23-P1P2	CD1D	CCACCTTGTTGGTCCTCGCTGGGCTTGCCGGGTTTAAGAGCTAAGCTG	GTCCTCGCTGGGCTTGCCGG
CD1D_+_158151143.23-P1P2	CD1D	CCACCTTGTTGGAGAGGAGATGAGCTTCAGGGTTTAAGAGCTAAGCTG	GAGAGGAGATGAGCTTCAGG
CD2_+_117297108.23-P1P2	CD2	CCACCTTGTTGGTACATGGAAAGCTCATCTTGTTTAAGAGCTAAGCTG	GTACATGGAAAGCTCATCTT
CD2_-_117297509.23-P1P2	CD2	CCACCTTGTTGGGATGATCAGGATATCTACAGTTTAAGAGCTAAGCTG	GGATGATCAGGATATCTACA
CD2_-_117297294.23-P1P2	CD2	CCACCTTGTTGGCGAATGCCTTGGAAACCTGGTTTAAGAGCTAAGCTG	GCGAATGCCTTGGAAACCTG
CD2_+_117297046.23-P1P2	CD2	CCACCTTGTTGGGGAACTGAAGTGAGACTGGGTTTAAGAGCTAAGCTG	GGGAACTGAAGTGAGACTGG
CD2_+_117297288.23-P1P2	CD2	CCACCTTGTTGGTCCTGACCCAAGGCACCCCGTTTAAGAGCTAAGCTG	GTCCTGACCCAAGGCACCCC
CD200_+_112052020.23-P1P2	CD200	CCACCTTGTTGGCGCGCGAGGTGGCTGACTGGTTTAAGAGCTAAGCTG	GCGCGCGAGGTGGCTGACTG
CD200_-_112052392.23-P1P2	CD200	CCACCTTGTTGGCGAAGCTGGCGCATCCTCCGTTTAAGAGCTAAGCTG	GCGAAGCTGGCGCATCCTCC
CD200_-_112052204.23-P1P2	CD200	CCACCTTGTTGGGGTCCGGGGACTAGATCAGGTTTAAGAGCTAAGCTG	GGGTCCGGGGACTAGATCAG
CD200_-_112052434.23-P1P2	CD200	CCACCTTGTTGGGGCTCCAGCTCCCAAAACTGTTTAAGAGCTAAGCTG	GGGCTCCAGCTCCCAAAACT
CD200_+_112052385.23-P1P2	CD200	CCACCTTGTTGGCCGAGCCGAGCCTGCCCGGGTTTAAGAGCTAAGCTG	GCCGAGCCGAGCCTGCCCGG
CD200R1_-_112693695.23-P1P2	CD200R1	CCACCTTGTTGGTAGGTTAGCAGTTCTCCAAGTTTAAGAGCTAAGCTG	GTAGGTTAGCAGTTCTCCAA
CD200R1_-_112693600.23-P1P2	CD200R1	CCACCTTGTTGGCTCAGGAAGAGCTGAGACCGTTTAAGAGCTAAGCTG	GCTCAGGAAGAGCTGAGACC
CD200R1_-_112693836.23-P1P2	CD200R1	CCACCTTGTTGGTCTTACCCCATCAACAGTGGTTTAAGAGCTAAGCTG	GTCTTACCCCATCAACAGTG
CD200R1_+_112693519.23-P1P2	CD200R1	CCACCTTGTTGGTTGCAATAATAAATATAGGGTTTAAGAGCTAAGCTG	GTTGCAATAATAAATATAGG
CD200R1_-_112693499.23-P1P2	CD200R1	CCACCTTGTTGGAATAAAGTAAACTAGATATGTTTAAGAGCTAAGCTG	GAATAAAGTAAACTAGATAT
CD200R1L_-_112565661.23-P1P2	CD200R1L	CCACCTTGTTGGgaaaactgggcgcatacacGTTTAAGAGCTAAGCTG	Ggaaaactgggcgcatacac
CD200R1L_-_112565549.23-P1P2	CD200R1L	CCACCTTGTTGGtggccatgctgaaatagatGTTTAAGAGCTAAGCTG	Gtggccatgctgaaatagat
CD200R1L_-_112565263.23-P1P2	CD200R1L	CCACCTTGTTGGgatttacattatcccagttGTTTAAGAGCTAAGCTG	Ggatttacattatcccagtt
CD200R1L_-_112565365.23-P1P2	CD200R1L	CCACCTTGTTGGcacctaggaattaaattgtGTTTAAGAGCTAAGCTG	Gcacctaggaattaaattgt
CD200R1L_-_112565622.23-P1P2	CD200R1L	CCACCTTGTTGGTGCACTTCTTAGCTTTTTAGTTTAAGAGCTAAGCTG	GTGCACTTCTTAGCTTTTTA
CD22_+_35820498.23-P1P2	CD22	CCACCTTGTTGGCCCAGGCCCGGGAATTGGAGTTTAAGAGCTAAGCTG	GCCCAGGCCCGGGAATTGGA
CD22_+_35820521.23-P1P2	CD22	CCACCTTGTTGGTCTCTGGAGCACAGGAGTAGTTTAAGAGCTAAGCTG	GTCTCTGGAGCACAGGAGTA
CD22_+_35820491.23-P1P2	CD22	CCACCTTGTTGGCCGGGAATTGGAAGGCTGAGTTTAAGAGCTAAGCTG	GCCGGGAATTGGAAGGCTGA
CD22_+_35820104.23-P1P2	CD22	CCACCTTGTTGGCGCGTGTCTTCCCTCTTCAGTTTAAGAGCTAAGCTG	GCGCGTGTCTTCCCTCTTCA
CD22_+_35820536.23-P1P2	CD22	CCACCTTGTTGGAAGGAGCTCCAGGAGTCTCGTTTAAGAGCTAAGCTG	GAAGGAGCTCCAGGAGTCTC
CD226_-_67615027.23-P1P2	CD226	CCACCTTGTTGGgaacttacattctatgtggGTTTAAGAGCTAAGCTG	Ggaacttacattctatgtgg
CD226_-_67614632.23-P1P2	CD226	CCACCTTGTTGGGAAGAGCCAAAAGTAAAGTGTTTAAGAGCTAAGCTG	GGAAGAGCCAAAAGTAAAGT
CD226_-_67614870.23-P1P2	CD226	CCACCTTGTTGGTCTCTCTCGGGGAACCAGTGTTTAAGAGCTAAGCTG	GTCTCTCTCGGGGAACCAGT
CD226_-_67615030.23-P1P2	CD226	CCACCTTGTTGGcttacattctatgtggaggGTTTAAGAGCTAAGCTG	Gcttacattctatgtggagg
CD226_-_67615079.23-P1P2	CD226	CCACCTTGTTGGataaataataagtgaaaggGTTTAAGAGCTAAGCTG	Gataaataataagtgaaagg
CD24_+_21154599.23-P1P2	CD24	CCACCTTGTTGGACGCGCCGCGCACCGACGTGTTTAAGAGCTAAGCTG	GACGCGCCGCGCACCGACGT
CD24_-_21154470.23-P1P2	CD24	CCACCTTGTTGGTTTGGGGCCAACCCAGTGTGTTTAAGAGCTAAGCTG	GTTTGGGGCCAACCCAGTGT
CD24_+_21154590.23-P1P2	CD24	CCACCTTGTTGGGCACCGACGTAGGGGACATGTTTAAGAGCTAAGCTG	GGCACCGACGTAGGGGACAT
CD24_+_21154272.23-P1P2	CD24	CCACCTTGTTGGGGCGTCTGGAAGTCCAATGGTTTAAGAGCTAAGCTG	GGGCGTCTGGAAGTCCAATG
CD24_-_21154636.23-P1P2	CD24	CCACCTTGTTGGGCGCGTCTAGCAGGATGCTGTTTAAGAGCTAAGCTG	GGCGCGTCTAGCAGGATGCT
CD244_+_160832225.23-P1P2	CD244	CCACCTTGTTGGAGGCTGGCAGTGCACTGGGGTTTAAGAGCTAAGCTG	GAGGCTGGCAGTGCACTGGG
CD244_+_160832174.23-P1P2	CD244	CCACCTTGTTGGCAGCAATCCAGGAAGTCTTGTTTAAGAGCTAAGCTG	GCAGCAATCCAGGAAGTCTT
CD244_-_160832563.23-P1P2	CD244	CCACCTTGTTGGCAGTCAGCAAGAGGACGATGTTTAAGAGCTAAGCTG	GCAGTCAGCAAGAGGACGAT
CD244_+_160832507.23-P1P2	CD244	CCACCTTGTTGGCCGTGCACGGCAGAGAGTCGTTTAAGAGCTAAGCTG	GCCGTGCACGGCAGAGAGTC
CD244_-_160832642.23-P1P2	CD244	CCACCTTGTTGGCGCCTGCTGTGAGCTGACAGTTTAAGAGCTAAGCTG	GCGCCTGCTGTGAGCTGACA
CD247_+_167487323.23-P1P2	CD247	CCACCTTGTTGGCCAGGGTAGAGAAACGGAGGTTTAAGAGCTAAGCTG	GCCAGGGTAGAGAAACGGAG
CD247_+_167487350.23-P1P2	CD247	CCACCTTGTTGGGGAAGCAAGAGAGCAACCGGTTTAAGAGCTAAGCTG	GGGAAGCAAGAGAGCAACCG
CD247_-_167487768.23-P1P2	CD247	CCACCTTGTTGGAGCGGTGGCCGGGACGGTTGTTTAAGAGCTAAGCTG	GAGCGGTGGCCGGGACGGTT
CD247_-_167487282.23-P1P2	CD247	CCACCTTGTTGGCGCAGCACGAAACATGGCCGTTTAAGAGCTAAGCTG	GCGCAGCACGAAACATGGCC
CD247_+_167487623.23-P1P2	CD247	CCACCTTGTTGGGGTAGGGCCGACGTGTCGAGTTTAAGAGCTAAGCTG	GGGTAGGGCCGACGTGTCGA
CD248_+_66084505.23-P1P2	CD248	CCACCTTGTTGGCGGGGCCGGACCAGTCCGGGTTTAAGAGCTAAGCTG	GCGGGGCCGGACCAGTCCGG
CD248_+_66084434.23-P1P2	CD248	CCACCTTGTTGGACACTGGGCCAGGACCCCTGTTTAAGAGCTAAGCTG	GACACTGGGCCAGGACCCCT
CD248_-_66084078.23-P1P2	CD248	CCACCTTGTTGGGCACGAGCCCTCCAGCCAGGTTTAAGAGCTAAGCTG	GGCACGAGCCCTCCAGCCAG
CD248_-_66084486.23-P1P2	CD248	CCACCTTGTTGGGGCCGCCCAGGCCAGCAACGTTTAAGAGCTAAGCTG	GGGCCGCCCAGGCCAGCAAC
CD248_-_66084310.23-P1P2	CD248	CCACCTTGTTGGACACGCTGGGCCTCCTCGGGTTTAAGAGCTAAGCTG	GACACGCTGGGCCTCCTCGG
CD27_+_6554569.23-P1P2	CD27	CCACCTTGTTGGTCCTGGGAGGAGAGGGTAAGTTTAAGAGCTAAGCTG	GTCCTGGGAGGAGAGGGTAA
CD27_+_6554341.23-P1P2	CD27	CCACCTTGTTGGAGCCCAGTAGTGCCTCTCTGTTTAAGAGCTAAGCTG	GAGCCCAGTAGTGCCTCTCT
CD27_-_6554496.23-P1P2	CD27	CCACCTTGTTGGGTGAGACTGAGCTCAAGCAGTTTAAGAGCTAAGCTG	GGTGAGACTGAGCTCAAGCA
CD27_-_6554538.23-P1P2	CD27	CCACCTTGTTGGGGGAGGCACCACCTTGAAGGTTTAAGAGCTAAGCTG	GGGGAGGCACCACCTTGAAG
CD27_-_6554213.23-P1P2	CD27	CCACCTTGTTGGTTGGAGGTGCTAACTCCAGGTTTAAGAGCTAAGCTG	GTTGGAGGTGCTAACTCCAG
CD274_+_5450574.23-P1P2	CD274	CCACCTTGTTGGCTGCAGGCGGACAGAAGCGGTTTAAGAGCTAAGCTG	GCTGCAGGCGGACAGAAGCG
CD274_+_5450565.23-P1P2	CD274	CCACCTTGTTGGGACAGAAGCGCGGCTGGTGGTTTAAGAGCTAAGCTG	GGACAGAAGCGCGGCTGGTG
CD274_+_5450630.23-P1P2	CD274	CCACCTTGTTGGCGAGCTAGCCAGAGATACTGTTTAAGAGCTAAGCTG	GCGAGCTAGCCAGAGATACT
CD274_+_5450537.23-P1P2	CD274	CCACCTTGTTGGGGGAAGCTGCGCAGAACTGGTTTAAGAGCTAAGCTG	GGGGAAGCTGCGCAGAACTG
CD274_-_5450938.23-P1P2	CD274	CCACCTTGTTGGAGGCTGGAGGTCTGGACACGTTTAAGAGCTAAGCTG	GAGGCTGGAGGTCTGGACAC
CD276_+_73976773.23-P1P2	CD276	CCACCTTGTTGGgcgccgACTCTGGGACTCAGTTTAAGAGCTAAGCTG	GgcgccgACTCTGGGACTCA
CD276_+_73976841.23-P1P2	CD276	CCACCTTGTTGGCCCGGCCCGCAGCAGACAAGTTTAAGAGCTAAGCTG	GCCCGGCCCGCAGCAGACAA
CD276_-_73976791.23-P1P2	CD276	CCACCTTGTTGGCGTCCCTGAGTCCCAGAGTGTTTAAGAGCTAAGCTG	GCGTCCCTGAGTCCCAGAGT
CD276_+_73977163.23-P1P2	CD276	CCACCTTGTTGGCATGCCCGCTCCAGACCCGGTTTAAGAGCTAAGCTG	GCATGCCCGCTCCAGACCCG
CD276_-_73976745.23-P1P2	CD276	CCACCTTGTTGGTTCGGGCCGGGCCTCGCTGGTTTAAGAGCTAAGCTG	GTTCGGGCCGGGCCTCGCTG
CD28_+_204571355.23-P1P2	CD28	CCACCTTGTTGGGAGGAACCCGAAGTGTGAGGTTTAAGAGCTAAGCTG	GGAGGAACCCGAAGTGTGAG
CD28_+_204571401.23-P1P2	CD28	CCACCTTGTTGGGCATCTTTGTCCTGACGATGTTTAAGAGCTAAGCTG	GGCATCTTTGTCCTGACGAT
CD28_-_204571383.23-P1P2	CD28	CCACCTTGTTGGCACTTCGGGTTCCTCGGGGGTTTAAGAGCTAAGCTG	GCACTTCGGGTTCCTCGGGG
CD28_-_204571412.23-P1P2	CD28	CCACCTTGTTGGGGAACCCTAGCCCATCGTCGTTTAAGAGCTAAGCTG	GGGAACCCTAGCCCATCGTC
CD28_-_204571427.23-P1P2	CD28	CCACCTTGTTGGCGTCAGGACAAAGATGCTCGTTTAAGAGCTAAGCTG	GCGTCAGGACAAAGATGCTC
CD300A_-_72463214.23-P1P2	CD300A	CCACCTTGTTGGAGGCAGGATGTGTCAGGGTGTTTAAGAGCTAAGCTG	GAGGCAGGATGTGTCAGGGT
CD300A_-_72462833.23-P1P2	CD300A	CCACCTTGTTGGGCAAGTGCCGCCTGTGCTGGTTTAAGAGCTAAGCTG	GGCAAGTGCCGCCTGTGCTG
CD300A_+_72462840.23-P1P2	CD300A	CCACCTTGTTGGAGAGCCCAAGGCAGCCACAGTTTAAGAGCTAAGCTG	GAGAGCCCAAGGCAGCCACA
CD300A_-_72462799.23-P1P2	CD300A	CCACCTTGTTGGTTCCCCTCGGGTCCAGGTAGTTTAAGAGCTAAGCTG	GTTCCCCTCGGGTCCAGGTA
CD300A_+_72463228.23-P1P2	CD300A	CCACCTTGTTGGACATGCCCCTCGCAGTCAGGTTTAAGAGCTAAGCTG	GACATGCCCCTCGCAGTCAG
CD300C_+_72542184.23-P1P2	CD300C	CCACCTTGTTGGTGGCTGCATCGCCACCCAAGTTTAAGAGCTAAGCTG	GTGGCTGCATCGCCACCCAA
CD300C_-_72542194.23-P1P2	CD300C	CCACCTTGTTGGAAGTCCAGGGTCCCTTGGGGTTTAAGAGCTAAGCTG	GAAGTCCAGGGTCCCTTGGG
CD300C_-_72542182.23-P1P2	CD300C	CCACCTTGTTGGTGACGTCTGGCAAAGTCCAGTTTAAGAGCTAAGCTG	GTGACGTCTGGCAAAGTCCA
CD300C_-_72542191.23-P1P2	CD300C	CCACCTTGTTGGGCAAAGTCCAGGGTCCCTTGTTTAAGAGCTAAGCTG	GGCAAAGTCCAGGGTCCCTT
CD300C_+_72542150.23-P1P2	CD300C	CCACCTTGTTGGGCCAGACGTCAGGGTTGAGGTTTAAGAGCTAAGCTG	GGCCAGACGTCAGGGTTGAG
CD300E_-_72619828.23-P1P2	CD300E	CCACCTTGTTGGGGAATCCAAGTATATGTAAGTTTAAGAGCTAAGCTG	GGGAATCCAAGTATATGTAA
CD300E_-_72619391.23-P1P2	CD300E	CCACCTTGTTGGcttccaagagcaaagtgagGTTTAAGAGCTAAGCTG	Gcttccaagagcaaagtgag
CD300E_+_72619864.23-P1P2	CD300E	CCACCTTGTTGGTAGATGAGTGAGAACACAAGTTTAAGAGCTAAGCTG	GTAGATGAGTGAGAACACAA
CD300E_+_72619831.23-P1P2	CD300E	CCACCTTGTTGGAGTAGAAAGTGGATGACCCGTTTAAGAGCTAAGCTG	GAGTAGAAAGTGGATGACCC
CD300E_+_72619841.23-P1P2	CD300E	CCACCTTGTTGGAACTTGGACAAGTAGAAAGGTTTAAGAGCTAAGCTG	GAACTTGGACAAGTAGAAAG
CD300LB_+_72527408.23-P1P2	CD300LB	CCACCTTGTTGGTGGGCGCTTGGTATGACAGGTTTAAGAGCTAAGCTG	GTGGGCGCTTGGTATGACAG
CD300LB_+_72527588.23-P1P2	CD300LB	CCACCTTGTTGGGGCGGTCTAGATGTGCAGAGTTTAAGAGCTAAGCTG	GGGCGGTCTAGATGTGCAGA
CD300LB_+_72527353.23-P1P2	CD300LB	CCACCTTGTTGGCATCCAGGGAAATGAGAGGGTTTAAGAGCTAAGCTG	GCATCCAGGGAAATGAGAGG
CD300LB_+_72527513.23-P1P2	CD300LB	CCACCTTGTTGGCCACTGGTTGCAGATCAGGGTTTAAGAGCTAAGCTG	GCCACTGGTTGCAGATCAGG
CD300LB_-_72527245.23-P1P2	CD300LB	CCACCTTGTTGGtgagccaTGGCCTCAAGCCGTTTAAGAGCTAAGCTG	GtgagccaTGGCCTCAAGCC
CD300LD_+_72588356.23-P1P2	CD300LD	CCACCTTGTTGGACCTGTGATCACCAAGGAGGTTTAAGAGCTAAGCTG	GACCTGTGATCACCAAGGAG
CD300LD_+_72588386.23-P1P2	CD300LD	CCACCTTGTTGGTTGGATTCAAGTCCCTGAAGTTTAAGAGCTAAGCTG	GTTGGATTCAAGTCCCTGAA
CD300LD_+_72588361.23-P1P2	CD300LD	CCACCTTGTTGGCAGACACCTGTGATCACCAGTTTAAGAGCTAAGCTG	GCAGACACCTGTGATCACCA
CD300LD_-_72588395.23-P1P2	CD300LD	CCACCTTGTTGGAGGTGTCTGGTGCCCTTCAGTTTAAGAGCTAAGCTG	GAGGTGTCTGGTGCCCTTCA
CD300LD_+_72588065.23-P1P2	CD300LD	CCACCTTGTTGGTAGCTTCTTGTTGGAACAGGTTTAAGAGCTAAGCTG	GTAGCTTCTTGTTGGAACAG
CD300LF_-_72709001.23-P1P2	CD300LF	CCACCTTGTTGGGCAGGTAGAGTGTCAGCAGGTTTAAGAGCTAAGCTG	GGCAGGTAGAGTGTCAGCAG
CD300LF_-_72708646.23-P1P2	CD300LF	CCACCTTGTTGGGATCACCCAGTCCAGGATCGTTTAAGAGCTAAGCTG	GGATCACCCAGTCCAGGATC
CD300LF_+_72709097.23-P1P2	CD300LF	CCACCTTGTTGGACTGAAGGAGGAAGTTCAAGTTTAAGAGCTAAGCTG	GACTGAAGGAGGAAGTTCAA
CD300LF_+_72708670.23-P1P2	CD300LF	CCACCTTGTTGGAAAAGCAGAGGAGGAACATGTTTAAGAGCTAAGCTG	GAAAAGCAGAGGAGGAACAT
CD300LF_-_72709039.23-P1P2	CD300LF	CCACCTTGTTGGAGGTCCCCGTTCCCCTCAGGTTTAAGAGCTAAGCTG	GAGGTCCCCGTTCCCCTCAG
CD302_-_160654675.23-P1P2	CD302	CCACCTTGTTGGcagcggcgaggcccagcaaGTTTAAGAGCTAAGCTG	Gcagcggcgaggcccagcaa
CD302_-_160654636.23-P1P2	CD302	CCACCTTGTTGGCCGGCGAGGGACTACGTAAGTTTAAGAGCTAAGCTG	GCCGGCGAGGGACTACGTAA
CD302_-_160654659.23-P1P2	CD302	CCACCTTGTTGGTTACCCgcgacggcagcagGTTTAAGAGCTAAGCTG	GTTACCCgcgacggcagcag
CD302_-_160654690.23-P1P2	CD302	CCACCTTGTTGGgcaacggcagcaggagcgcGTTTAAGAGCTAAGCTG	Ggcaacggcagcaggagcgc
CD302_-_160654716.23-P1P2	CD302	CCACCTTGTTGGgcggcccggagcatgacggGTTTAAGAGCTAAGCTG	Ggcggcccggagcatgacgg
CD320_-_8373189.23-P1P2	CD320	CCACCTTGTTGGGCTCATGCTGTCCCCACAGGTTTAAGAGCTAAGCTG	GGCTCATGCTGTCCCCACAG
CD320_+_8373212.23-P1P2	CD320	CCACCTTGTTGGGTGCGCAGGGATAAGAGAGGTTTAAGAGCTAAGCTG	GGTGCGCAGGGATAAGAGAG
CD320_-_8372771.23-P1P2	CD320	CCACCTTGTTGGGTGACAATGGGGGACGACAGTTTAAGAGCTAAGCTG	GGTGACAATGGGGGACGACA
CD320_+_8373265.23-P1P2	CD320	CCACCTTGTTGGCGGGCGCCGCAGAACTCAGGTTTAAGAGCTAAGCTG	GCGGGCGCCGCAGAACTCAG
CD320_+_8373207.23-P1P2	CD320	CCACCTTGTTGGCAGGGATAAGAGAGCGGTCGTTTAAGAGCTAAGCTG	GCAGGGATAAGAGAGCGGTC
CD33_+_51729507.23-P1P2	CD33	CCACCTTGTTGGGTAGAGATGAGATAAGGGTGTTTAAGAGCTAAGCTG	GGTAGAGATGAGATAAGGGT
CD33_+_51729086.23-P1P2	CD33	CCACCTTGTTGGGCCGGGTTCTAGAGTGCCAGTTTAAGAGCTAAGCTG	GGCCGGGTTCTAGAGTGCCA
CD33_+_51729005.23-P1P2	CD33	CCACCTTGTTGGGGAGGGAGGGTCCAGGTGAGTTTAAGAGCTAAGCTG	GGGAGGGAGGGTCCAGGTGA
CD33_-_51728897.23-P1P2	CD33	CCACCTTGTTGGGGCCGCAAGGGAAGTTCATGTTTAAGAGCTAAGCTG	GGGCCGCAAGGGAAGTTCAT
CD33_+_51729159.23-P1P2	CD33	CCACCTTGTTGGACAACCAGGAGAAGATCGGGTTTAAGAGCTAAGCTG	GACAACCAGGAGAAGATCGG
CD34_-_208084461.23-P1P2	CD34	CCACCTTGTTGGCCTAGAGAGACGCACCGAGGTTTAAGAGCTAAGCTG	GCCTAGAGAGACGCACCGAG
CD34_-_208084475.23-P1P2	CD34	CCACCTTGTTGGCCGAGTGGAAGACACTACTGTTTAAGAGCTAAGCTG	GCCGAGTGGAAGACACTACT
CD34_+_208084084.23-P1P2	CD34	CCACCTTGTTGGTCAGCACGACTGGTTCCAAGTTTAAGAGCTAAGCTG	GTCAGCACGACTGGTTCCAA
CD34_+_208083993.23-P1P2	CD34	CCACCTTGTTGGAGCCAGAACCGGGAGACTGGTTTAAGAGCTAAGCTG	GAGCCAGAACCGGGAGACTG
CD34_+_208084249.23-P1P2	CD34	CCACCTTGTTGGCAGAGCAGAGTCTCACGGAGTTTAAGAGCTAAGCTG	GCAGAGCAGAGTCTCACGGA
CD3D_+_118213387.23-P1P2	CD3D	CCACCTTGTTGGCTGTGAGTCAGCTAGGGGAGTTTAAGAGCTAAGCTG	GCTGTGAGTCAGCTAGGGGA
CD3D_-_118213331.23-P1P2	CD3D	CCACCTTGTTGGGCTATGTTCCATCTCCCAGGTTTAAGAGCTAAGCTG	GGCTATGTTCCATCTCCCAG
CD3D_+_118213391.23-P1P2	CD3D	CCACCTTGTTGGGTACCTGTGAGTCAGCTAGGTTTAAGAGCTAAGCTG	GGTACCTGTGAGTCAGCTAG
CD3D_+_118213247.23-P1P2	CD3D	CCACCTTGTTGGAGGTAAGGCTACTCCAGGTGTTTAAGAGCTAAGCTG	GAGGTAAGGCTACTCCAGGT
CD3D_-_118213377.23-P1P2	CD3D	CCACCTTGTTGGGTCACCGAACTATCAGCCTGTTTAAGAGCTAAGCTG	GGTCACCGAACTATCAGCCT
CD3E_+_118175886.23-P1P2	CD3E	CCACCTTGTTGGACGCTCTCCCAGGCACCCGGTTTAAGAGCTAAGCTG	GACGCTCTCCCAGGCACCCG
CD3E_-_118175491.23-P1P2	CD3E	CCACCTTGTTGGAGGTGCCTGCTTCAGAAAAGTTTAAGAGCTAAGCTG	GAGGTGCCTGCTTCAGAAAA
CD3E_+_118175516.23-P1P2	CD3E	CCACCTTGTTGGCCCAATGCTAGGATGAAAAGTTTAAGAGCTAAGCTG	GCCCAATGCTAGGATGAAAA
CD3E_-_118175687.23-P1P2	CD3E	CCACCTTGTTGGGATGCAGTCGGGCACTCACGTTTAAGAGCTAAGCTG	GGATGCAGTCGGGCACTCAC
CD3E_-_118175913.23-P1P2	CD3E	CCACCTTGTTGGGTGCCTGGGAGAGCGTTCGGTTTAAGAGCTAAGCTG	GGTGCCTGGGAGAGCGTTCG
CD3G_-_118215053.23-P1P2	CD3G	CCACCTTGTTGGCAGCCCCAACAGTGATGGGGTTTAAGAGCTAAGCTG	GCAGCCCCAACAGTGATGGG
CD3G_+_118215119.23-P1P2	CD3G	CCACCTTGTTGGCATGTCAGTCTCTGTCCTCGTTTAAGAGCTAAGCTG	GCATGTCAGTCTCTGTCCTC
CD3G_+_118215516.23-P1P2	CD3G	CCACCTTGTTGGAGCCCCCAGCTCTGAAGTAGTTTAAGAGCTAAGCTG	GAGCCCCCAGCTCTGAAGTA
CD3G_+_118215108.23-P1P2	CD3G	CCACCTTGTTGGCTGTCCTCCGGCAAAAGCGGTTTAAGAGCTAAGCTG	GCTGTCCTCCGGCAAAAGCG
CD3G_-_118215076.23-P1P2	CD3G	CCACCTTGTTGGGCCAGTCTAGCTGCTGCACGTTTAAGAGCTAAGCTG	GGCCAGTCTAGCTGCTGCAC
CD4_+_6898908.23-P1P2	CD4	CCACCTTGTTGGGAGCTGTGGGCAGACAACTGTTTAAGAGCTAAGCTG	GGAGCTGTGGGCAGACAACT
CD4_-_6899142.23-P1P2	CD4	CCACCTTGTTGGGAAGACTGGAGACTATCCCGTTTAAGAGCTAAGCTG	GGAAGACTGGAGACTATCCC
CD4_-_6899175.23-P1P2	CD4	CCACCTTGTTGGGTGGAAGGCAACTAGTCGTGTTTAAGAGCTAAGCTG	GGTGGAAGGCAACTAGTCGT
CD4_-_6899161.23-P1P2	CD4	CCACCTTGTTGGAGGCTGGGAAAGGCGTGGAGTTTAAGAGCTAAGCTG	GAGGCTGGGAAAGGCGTGGA
CD4_+_6898750.23-P1P2	CD4	CCACCTTGTTGGGACTTGGAGCTCTGCAACCGTTTAAGAGCTAAGCTG	GGACTTGGAGCTCTGCAACC
CD40_+_44746965.23-P1P2	CD40	CCACCTTGTTGGACCATAGCGAGGTGAGACCGTTTAAGAGCTAAGCTG	GACCATAGCGAGGTGAGACC
CD40_+_44746975.23-P1P2	CD40	CCACCTTGTTGGAGGCAGACGAACCATAGCGGTTTAAGAGCTAAGCTG	GAGGCAGACGAACCATAGCG
CD40_-_44746985.23-P1P2	CD40	CCACCTTGTTGGGCCTGGTCTCACCTCGCTAGTTTAAGAGCTAAGCTG	GGCCTGGTCTCACCTCGCTA
CD40_-_44746946.23-P1P2	CD40	CCACCTTGTTGGGTCAGCAGAGGCCTCGCTCGTTTAAGAGCTAAGCTG	GGTCAGCAGAGGCCTCGCTC
CD40_+_44746950.23-P1P2	CD40	CCACCTTGTTGGGACCAGGCGGCAGGACCACGTTTAAGAGCTAAGCTG	GGACCAGGCGGCAGGACCAC
CD44_+_35160739.23-P1P2	CD44	CCACCTTGTTGGGGCGGACCGAACCTGGCAGGTTTAAGAGCTAAGCTG	GGGCGGACCGAACCTGGCAG
CD44_+_35160759.23-P1P2	CD44	CCACCTTGTTGGGCGGAGGACGGGACGAGGAGTTTAAGAGCTAAGCTG	GGCGGAGGACGGGACGAGGA
CD44_+_35160895.23-P1P2	CD44	CCACCTTGTTGGCGATCTGCGCCAGGCTCAGGTTTAAGAGCTAAGCTG	GCGATCTGCGCCAGGCTCAG
CD44_+_35160756.23-P1P2	CD44	CCACCTTGTTGGGAGGACGGGACGAGGATGGGTTTAAGAGCTAAGCTG	GGAGGACGGGACGAGGATGG
CD44_+_35160745.23-P1P2	CD44	CCACCTTGTTGGGAGGATGGCGGACCGAACCGTTTAAGAGCTAAGCTG	GGAGGATGGCGGACCGAACC
CD47_+_107809817.23-P1P2	CD47	CCACCTTGTTGGcggtcggtcctgcctgtaaGTTTAAGAGCTAAGCTG	Gcggtcggtcctgcctgtaa
CD47_+_107809814.23-P1P2	CD47	CCACCTTGTTGGtcggtcctgcctgtaacggGTTTAAGAGCTAAGCTG	Gtcggtcctgcctgtaacgg
CD47_+_107809367.23-P1P2	CD47	CCACCTTGTTGGCAAGAAAGGGCGCGATCAGGTTTAAGAGCTAAGCTG	GCAAGAAAGGGCGCGATCAG
CD47_-_107809464.23-P1P2	CD47	CCACCTTGTTGGTTGGAGATGGAGAACCGGGGTTTAAGAGCTAAGCTG	GTTGGAGATGGAGAACCGGG
CD47_-_107809826.23-P1P2	CD47	CCACCTTGTTGGcagccgccgccgccgttacGTTTAAGAGCTAAGCTG	Gcagccgccgccgccgttac
CD48_+_160681557.23-P1P2	CD48	CCACCTTGTTGGGTTGCTGGGAAGTTCTGGAGTTTAAGAGCTAAGCTG	GGTTGCTGGGAAGTTCTGGA
CD48_+_160681539.23-P1P2	CD48	CCACCTTGTTGGAAGGAAGCATGTGCTCCAGGTTTAAGAGCTAAGCTG	GAAGGAAGCATGTGCTCCAG
CD48_+_160681561.23-P1P2	CD48	CCACCTTGTTGGCTGCGTTGCTGGGAAGTTCGTTTAAGAGCTAAGCTG	GCTGCGTTGCTGGGAAGTTC
CD48_-_160681212.23-P1P2	CD48	CCACCTTGTTGGTTCATGGACCACCAACCACGTTTAAGAGCTAAGCTG	GTTCATGGACCACCAACCAC
CD48_-_160681225.23-P1P2	CD48	CCACCTTGTTGGAACCACGGGACAAAATATGGTTTAAGAGCTAAGCTG	GAACCACGGGACAAAATATG
CD5_+_60870035.23-P1P2	CD5	CCACCTTGTTGGGCGGTTGCAGAGACCCCATGTTTAAGAGCTAAGCTG	GGCGGTTGCAGAGACCCCAT
CD5_+_60869978.23-P1P2	CD5	CCACCTTGTTGGAGCTGGGCACCGCAGGTGAGTTTAAGAGCTAAGCTG	GAGCTGGGCACCGCAGGTGA
CD5_+_60869984.23-P1P2	CD5	CCACCTTGTTGGCTGGGCAGCTGGGCACCGCGTTTAAGAGCTAAGCTG	GCTGGGCAGCTGGGCACCGC
CD5_+_60869946.23-P1P2	CD5	CCACCTTGTTGGGGTATCTCGCTCTCAGAGAGTTTAAGAGCTAAGCTG	GGGTATCTCGCTCTCAGAGA
CD5_+_60869971.23-P1P2	CD5	CCACCTTGTTGGCACCGCAGGTGAGGGTGTCGTTTAAGAGCTAAGCTG	GCACCGCAGGTGAGGGTGTC
CD52_+_26644443.23-P1P2	CD52	CCACCTTGTTGGTGATCTCAGGGCTGTCTGGGTTTAAGAGCTAAGCTG	GTGATCTCAGGGCTGTCTGG
CD52_+_26644446.23-P1P2	CD52	CCACCTTGTTGGAGGTGATCTCAGGGCTGTCGTTTAAGAGCTAAGCTG	GAGGTGATCTCAGGGCTGTC
CD52_-_26644811.23-P1P2	CD52	CCACCTTGTTGGCAGCTGGGGAGCACTTACAGTTTAAGAGCTAAGCTG	GCAGCTGGGGAGCACTTACA
CD52_+_26644480.23-P1P2	CD52	CCACCTTGTTGGAGGATCTTCGTGGCTGTCTGTTTAAGAGCTAAGCTG	GAGGATCTTCGTGGCTGTCT
CD52_+_26644903.23-P1P2	CD52	CCACCTTGTTGGATCTCCCCAGACTCCCTGTGTTTAAGAGCTAAGCTG	GATCTCCCCAGACTCCCTGT
CD55_+_207495720.23-P1P2	CD55	CCACCTTGTTGGGGAAGGCCACAGTCACCTAGTTTAAGAGCTAAGCTG	GGGAAGGCCACAGTCACCTA
CD55_+_207495045.23-P1P2	CD55	CCACCTTGTTGGGAGTCGCAGCTACGCCCAGGTTTAAGAGCTAAGCTG	GGAGTCGCAGCTACGCCCAG
CD55_+_207495088.23-P1P2	CD55	CCACCTTGTTGGGGCGCGCCGGGTTAGAACAGTTTAAGAGCTAAGCTG	GGGCGCGCCGGGTTAGAACA
CD55_-_207495267.23-P1P2	CD55	CCACCTTGTTGGCTGGGTGGGAGGTCCAAGTGTTTAAGAGCTAAGCTG	GCTGGGTGGGAGGTCCAAGT
CD55_-_207495079.23-P1P2	CD55	CCACCTTGTTGGCTGCGACTCGGCGGAGTCCGTTTAAGAGCTAAGCTG	GCTGCGACTCGGCGGAGTCC
CD58_+_117113609.23-P1P2	CD58	CCACCTTGTTGGTGGCTGGGCACTCGCGCAGGTTTAAGAGCTAAGCTG	GTGGCTGGGCACTCGCGCAG
CD58_-_117113680.23-P1P2	CD58	CCACCTTGTTGGACGCGGTCGGCCAGAAGTAGTTTAAGAGCTAAGCTG	GACGCGGTCGGCCAGAAGTA
CD58_-_117113604.23-P1P2	CD58	CCACCTTGTTGGCCAGCAACCATGGCTCGTCGTTTAAGAGCTAAGCTG	GCCAGCAACCATGGCTCGTC
CD58_-_117113595.23-P1P2	CD58	CCACCTTGTTGGGCGTCGCTCCCAGCAACCAGTTTAAGAGCTAAGCTG	GGCGTCGCTCCCAGCAACCA
CD58_+_117113590.23-P1P2	CD58	CCACCTTGTTGGAGGCCGGCCCGACGAGCCAGTTTAAGAGCTAAGCTG	GAGGCCGGCCCGACGAGCCA
CD59_-_33757554.23-P1	CD59	CCACCTTGTTGGGAACTGCCGTGACCACGGAGTTTAAGAGCTAAGCTG	GGAACTGCCGTGACCACGGA
CD59_-_33757933.23-P1	CD59	CCACCTTGTTGGTTCGGGCCTTCTTACCTGGGTTTAAGAGCTAAGCTG	GTTCGGGCCTTCTTACCTGG
CD59_+_33757977.23-P1	CD59	CCACCTTGTTGGCTGGAGCGAAAGAATGCGGGTTTAAGAGCTAAGCTG	GCTGGAGCGAAAGAATGCGG
CD59_+_33757950.23-P1	CD59	CCACCTTGTTGGCGCAGAAGCGGCTCGAGGCGTTTAAGAGCTAAGCTG	GCGCAGAAGCGGCTCGAGGC
CD59_+_33757918.23-P1	CD59	CCACCTTGTTGGTGGGCGCCGCCAGGTAAGAGTTTAAGAGCTAAGCTG	GTGGGCGCCGCCAGGTAAGA
CD59_+_33727660.23-P2	CD59	CCACCTTGTTGGCAGAGCCTCTGGGAGAGGAGTTTAAGAGCTAAGCTG	GCAGAGCCTCTGGGAGAGGA
CD59_+_33727616.23-P2	CD59	CCACCTTGTTGGGACTGAACTGGGAAACTCAGTTTAAGAGCTAAGCTG	GGACTGAACTGGGAAACTCA
CD59_+_33727664.23-P2	CD59	CCACCTTGTTGGGGTCCAGAGCCTCTGGGAGGTTTAAGAGCTAAGCTG	GGGTCCAGAGCCTCTGGGAG
CD59_+_33728005.23-P2	CD59	CCACCTTGTTGGtgtaaagggtctgccagatGTTTAAGAGCTAAGCTG	Gtgtaaagggtctgccagat
CD59_+_33727670.23-P2	CD59	CCACCTTGTTGGTGTGTAGGTCCAGAGCCTCGTTTAAGAGCTAAGCTG	GTGTGTAGGTCCAGAGCCTC
CD6_+_60739626.23-P1P2	CD6	CCACCTTGTTGGCCCTAGGGACCCATTGGTAGTTTAAGAGCTAAGCTG	GCCCTAGGGACCCATTGGTA
CD6_-_60739159.23-P1P2	CD6	CCACCTTGTTGGGCAGGCGTGAGACACTCACGTTTAAGAGCTAAGCTG	GGCAGGCGTGAGACACTCAC
CD6_-_60739611.23-P1P2	CD6	CCACCTTGTTGGTCCTGGAGTGACAGAATGTGTTTAAGAGCTAAGCTG	GTCCTGGAGTGACAGAATGT
CD6_-_60739537.23-P1P2	CD6	CCACCTTGTTGGCAGGGAGGTCCAGCATCTGGTTTAAGAGCTAAGCTG	GCAGGGAGGTCCAGCATCTG
CD6_-_60739568.23-P1P2	CD6	CCACCTTGTTGGGACACAGGAGCCCCTCGAGGTTTAAGAGCTAAGCTG	GGACACAGGAGCCCCTCGAG
CD68_-_7482987.23-P1P2	CD68	CCACCTTGTTGGAGCTGGACTTTGGGTGAGGGTTTAAGAGCTAAGCTG	GAGCTGGACTTTGGGTGAGG
CD68_-_7483004.23-P1P2	CD68	CCACCTTGTTGGGGCGGTTCAGCCATGAGGCGTTTAAGAGCTAAGCTG	GGGCGGTTCAGCCATGAGGC
CD68_-_7482978.23-P1P2	CD68	CCACCTTGTTGGAGACAGCCTAGCTGGACTTGTTTAAGAGCTAAGCTG	GAGACAGCCTAGCTGGACTT
CD68_+_7483177.23-P1P2	CD68	CCACCTTGTTGGTGGGTGTCACCGTGAAGGAGTTTAAGAGCTAAGCTG	GTGGGTGTCACCGTGAAGGA
CD68_+_7483092.23-P1P2	CD68	CCACCTTGTTGGGGAGATGGTTAGCAACCCAGTTTAAGAGCTAAGCTG	GGGAGATGGTTAGCAACCCA
CD7_-_80275014.23-P1P2	CD7	CCACCTTGTTGGCGGGGCATGGAGCAGATCTGTTTAAGAGCTAAGCTG	GCGGGGCATGGAGCAGATCT
CD7_-_80274997.23-P1P2	CD7	CCACCTTGTTGGAAAGACACGGTGCCTTACGGTTTAAGAGCTAAGCTG	GAAAGACACGGTGCCTTACG
CD7_-_80275431.23-P1P2	CD7	CCACCTTGTTGGTGAGCCTCTCTGGGTCTACGTTTAAGAGCTAAGCTG	GTGAGCCTCTCTGGGTCTAC
CD7_+_80274988.23-P1P2	CD7	CCACCTTGTTGGATCTGCTCCATGCCCCGTAGTTTAAGAGCTAAGCTG	GATCTGCTCCATGCCCCGTA
CD7_-_80275066.23-P1P2	CD7	CCACCTTGTTGGCCTCGTGTTCCGAGACTGTGTTTAAGAGCTAAGCTG	GCCTCGTGTTCCGAGACTGT
CD79A_-_42381384.23-P1P2	CD79A	CCACCTTGTTGGACTGGGAGAAGATGCCTGGGTTTAAGAGCTAAGCTG	GACTGGGAGAAGATGCCTGG
CD79A_-_42381367.23-P1P2	CD79A	CCACCTTGTTGGCTCAAACTAACCAACCCACGTTTAAGAGCTAAGCTG	GCTCAAACTAACCAACCCAC
CD79A_+_42381356.23-P1P2	CD79A	CCACCTTGTTGGGCATCTTCTCCCAGTGGGTGTTTAAGAGCTAAGCTG	GGCATCTTCTCCCAGTGGGT
CD79A_-_42381571.23-P1P2	CD79A	CCACCTTGTTGGAAGAGGAGGCAGAGGATAGGTTTAAGAGCTAAGCTG	GAAGAGGAGGCAGAGGATAG
CD79A_+_42381329.23-P1P2	CD79A	CCACCTTGTTGGTTGAGTTGCAGCAGTCCCAGTTTAAGAGCTAAGCTG	GTTGAGTTGCAGCAGTCCCA
CD79B_+_62009648.23-P1P2	CD79B	CCACCTTGTTGGGAGCCTCGGACGTTGTCACGTTTAAGAGCTAAGCTG	GGAGCCTCGGACGTTGTCAC
CD79B_-_62009674.23-P1P2	CD79B	CCACCTTGTTGGGACAACGTCCGAGGCTCCTGTTTAAGAGCTAAGCTG	GGACAACGTCCGAGGCTCCT
CD79B_+_62009265.23-P1P2	CD79B	CCACCTTGTTGGCCGTGGAAGAACTAGGCTCGTTTAAGAGCTAAGCTG	GCCGTGGAAGAACTAGGCTC
CD79B_-_62009588.23-P1P2	CD79B	CCACCTTGTTGGCAGCAACGCCACCATCCAGGTTTAAGAGCTAAGCTG	GCAGCAACGCCACCATCCAG
CD79B_-_62009666.23-P1P2	CD79B	CCACCTTGTTGGAAACCCGTGACAACGTCCGGTTTAAGAGCTAAGCTG	GAAACCCGTGACAACGTCCG
CD80_+_119278427.23-P1P2	CD80	CCACCTTGTTGGAAGTAACAGAAGTTAGAAGGTTTAAGAGCTAAGCTG	GAAGTAACAGAAGTTAGAAG
CD80_-_119278157.23-P1P2	CD80	CCACCTTGTTGGTGTGGGAATGAGACCCTAAGTTTAAGAGCTAAGCTG	GTGTGGGAATGAGACCCTAA
CD80_-_119278188.23-P1P2	CD80	CCACCTTGTTGGGGGCAAGCCTGGATCCAGGGTTTAAGAGCTAAGCTG	GGGGCAAGCCTGGATCCAGG
CD80_-_119278036.23-P1P2	CD80	CCACCTTGTTGGGGCTTGAGAAATTCAAATAGTTTAAGAGCTAAGCTG	GGGCTTGAGAAATTCAAATA
CD80_-_119278501.23-P1P2	CD80	CCACCTTGTTGGCAGTGCCAGGAGTTGGACAGTTTAAGAGCTAAGCTG	GCAGTGCCAGGAGTTGGACA
CD83_-_14118385.23-P1P2	CD83	CCACCTTGTTGGCTAGGCTGGCGACCCTCTGGTTTAAGAGCTAAGCTG	GCTAGGCTGGCGACCCTCTG
CD83_-_14118318.23-P1P2	CD83	CCACCTTGTTGGTAGGTGCTGCGATACCCACGTTTAAGAGCTAAGCTG	GTAGGTGCTGCGATACCCAC
CD83_+_14118040.23-P1P2	CD83	CCACCTTGTTGGAGCTGGAGGCCGCGCGACAGTTTAAGAGCTAAGCTG	GAGCTGGAGGCCGCGCGACA
CD83_+_14118272.23-P1P2	CD83	CCACCTTGTTGGTGACCCAGGAGACCGTGTAGTTTAAGAGCTAAGCTG	GTGACCCAGGAGACCGTGTA
CD83_+_14118433.23-P1P2	CD83	CCACCTTGTTGGGGAGGCGCGACGGGAGGCTGTTTAAGAGCTAAGCTG	GGGAGGCGCGACGGGAGGCT
CD84_+_160549223.23-P1P2	CD84	CCACCTTGTTGGGGTTAGACCCTGAAAGAGAGTTTAAGAGCTAAGCTG	GGGTTAGACCCTGAAAGAGA
CD84_-_160549212.23-P1P2	CD84	CCACCTTGTTGGGCAAAGGAGCAAGATCCATGTTTAAGAGCTAAGCTG	GGCAAAGGAGCAAGATCCAT
CD84_-_160549215.23-P1P2	CD84	CCACCTTGTTGGAAGGAGCAAGATCCATAGGGTTTAAGAGCTAAGCTG	GAAGGAGCAAGATCCATAGG
CD84_+_160548905.23-P1P2	CD84	CCACCTTGTTGGTGAGGCAAATCCTTCTCAGGTTTAAGAGCTAAGCTG	GTGAGGCAAATCCTTCTCAG
CD84_-_160549252.23-P1P2	CD84	CCACCTTGTTGGTTCAGGGTCTAACCTTCTGGTTTAAGAGCTAAGCTG	GTTCAGGGTCTAACCTTCTG
CD86_-_121774236.23-P1	CD86	CCACCTTGTTGGGCCGAGGAAGGCTTGCACAGTTTAAGAGCTAAGCTG	GGCCGAGGAAGGCTTGCACA
CD86_-_121774225.23-P1	CD86	CCACCTTGTTGGATACAGTCATTGCCGAGGAGTTTAAGAGCTAAGCTG	GATACAGTCATTGCCGAGGA
CD86_-_121774287.23-P1	CD86	CCACCTTGTTGGAGGGACTAGCACAGACACAGTTTAAGAGCTAAGCTG	GAGGGACTAGCACAGACACA
CD86_+_121774694.23-P1	CD86	CCACCTTGTTGGCCTCAGACCAAACTGACCCGTTTAAGAGCTAAGCTG	GCCTCAGACCAAACTGACCC
CD86_-_121774297.23-P1	CD86	CCACCTTGTTGGACAGACACACGGATGAGTGGTTTAAGAGCTAAGCTG	GACAGACACACGGATGAGTG
CD86_-_121796768.23-P2	CD86	CCACCTTGTTGGCAAGGAGCCTTAGGAGGTAGTTTAAGAGCTAAGCTG	GCAAGGAGCCTTAGGAGGTA
CD86_-_121796926.23-P2	CD86	CCACCTTGTTGGGGCTCAGACGCCTAGGGAGGTTTAAGAGCTAAGCTG	GGGCTCAGACGCCTAGGGAG
CD86_+_121796717.23-P2	CD86	CCACCTTGTTGGGAAATAATGCCAGGACTGAGTTTAAGAGCTAAGCTG	GGAAATAATGCCAGGACTGA
CD86_-_121796729.23-P2	CD86	CCACCTTGTTGGTGAGTTCTACCGTCAGTCCGTTTAAGAGCTAAGCTG	GTGAGTTCTACCGTCAGTCC
CD86_-_121797180.23-P2	CD86	CCACCTTGTTGGGTGCCACTTACCAAATAATGTTTAAGAGCTAAGCTG	GGTGCCACTTACCAAATAAT
CD8A_+_87017521.23-P1P2	CD8A	CCACCTTGTTGGACTTCCGCCGAGAGAACGAGTTTAAGAGCTAAGCTG	GACTTCCGCCGAGAGAACGA
CD8A_-_87017995.23-P1P2	CD8A	CCACCTTGTTGGCTCGAAGCTCGGGCGCGAGGTTTAAGAGCTAAGCTG	GCTCGAAGCTCGGGCGCGAG
CD8A_-_87017556.23-P1P2	CD8A	CCACCTTGTTGGGCGGAAGTCGCTCAGGGTGGTTTAAGAGCTAAGCTG	GGCGGAAGTCGCTCAGGGTG
CD8A_+_87017569.23-P1P2	CD8A	CCACCTTGTTGGGGTTCTCGGGCAAGAGGTTGTTTAAGAGCTAAGCTG	GGGTTCTCGGGCAAGAGGTT
CD8A_+_87018009.23-P1P2	CD8A	CCACCTTGTTGGTCCCCCCTCGGCGCCCCACGTTTAAGAGCTAAGCTG	GTCCCCCCTCGGCGCCCCAC
CD8B_-_87088921.23-P1P2	CD8B	CCACCTTGTTGGCCCGGGAGCGCAGACCCTTGTTTAAGAGCTAAGCTG	GCCCGGGAGCGCAGACCCTT
CD8B_+_87088914.23-P1P2	CD8B	CCACCTTGTTGGCGGCGCGCGGGCTACCCAAGTTTAAGAGCTAAGCTG	GCGGCGCGCGGGCTACCCAA
CD8B_-_87088736.23-P1P2	CD8B	CCACCTTGTTGGGGAGGTGGCCTCAGTCCAGGTTTAAGAGCTAAGCTG	GGGAGGTGGCCTCAGTCCAG
CD8B_+_87088901.23-P1P2	CD8B	CCACCTTGTTGGACCCAAGGGTCTGCGCTCCGTTTAAGAGCTAAGCTG	GACCCAAGGGTCTGCGCTCC
CD8B_-_87088744.23-P1P2	CD8B	CCACCTTGTTGGCCTCAGTCCAGGGGCTCTCGTTTAAGAGCTAAGCTG	GCCTCAGTCCAGGGGCTCTC
CD93_-_23066873.23-P1P2	CD93	CCACCTTGTTGGCGGGAGGCGAGAAGCCCAGGTTTAAGAGCTAAGCTG	GCGGGAGGCGAGAAGCCCAG
CD93_-_23066511.23-P1P2	CD93	CCACCTTGTTGGGCCCTTCAGCGGCAGACTAGTTTAAGAGCTAAGCTG	GGCCCTTCAGCGGCAGACTA
CD93_+_23066524.23-P1P2	CD93	CCACCTTGTTGGTTGGGCTCCAGCGAGAGAAGTTTAAGAGCTAAGCTG	GTTGGGCTCCAGCGAGAGAA
CD93_+_23066937.23-P1P2	CD93	CCACCTTGTTGGGTCCTTCTCTGCGCCGGAGGTTTAAGAGCTAAGCTG	GGTCCTTCTCTGCGCCGGAG
CD93_-_23066517.23-P1P2	CD93	CCACCTTGTTGGCAGCGGCAGACTAGGGTCCGTTTAAGAGCTAAGCTG	GCAGCGGCAGACTAGGGTCC
CD96_-_111261498.23-P1P2	CD96	CCACCTTGTTGGATGGTAGCCAAAACAACTGGTTTAAGAGCTAAGCTG	GATGGTAGCCAAAACAACTG
CD96_-_111261441.23-P1P2	CD96	CCACCTTGTTGGACAGGATCTCTGGAGTAATGTTTAAGAGCTAAGCTG	GACAGGATCTCTGGAGTAAT
CD96_+_111261165.23-P1P2	CD96	CCACCTTGTTGGTCCGACAAGAAGGGACAACGTTTAAGAGCTAAGCTG	GTCCGACAAGAAGGGACAAC
CD96_+_111261406.23-P1P2	CD96	CCACCTTGTTGGGATCCTGTTAGAAAGGAAAGTTTAAGAGCTAAGCTG	GGATCCTGTTAGAAAGGAAA
CD96_-_111261020.23-P1P2	CD96	CCACCTTGTTGGTTTTTTAGCACGAAGTGGGGTTTAAGAGCTAAGCTG	GTTTTTTAGCACGAAGTGGG
CD97_+_14492329.23-P1P2	CD97	CCACCTTGTTGGAGACGCGGCCTCCCATGGTGTTTAAGAGCTAAGCTG	GAGACGCGGCCTCCCATGGT
CD97_-_14492357.23-P1P2	CD97	CCACCTTGTTGGTGGGAGGCCGCGTCTTTCTGTTTAAGAGCTAAGCTG	GTGGGAGGCCGCGTCTTTCT
CD97_-_14492467.23-P1P2	CD97	CCACCTTGTTGGTCTGTGGGGCCTGCGATAGGTTTAAGAGCTAAGCTG	GTCTGTGGGGCCTGCGATAG
CD97_-_14492339.23-P1P2	CD97	CCACCTTGTTGGTGCCGGCAGCTCCAACCATGTTTAAGAGCTAAGCTG	GTGCCGGCAGCTCCAACCAT
CD97_-_14492342.23-P1P2	CD97	CCACCTTGTTGGCGGCAGCTCCAACCATGGGGTTTAAGAGCTAAGCTG	GCGGCAGCTCCAACCATGGG
CD99_+_2609369.23-P1P2	CD99	CCACCTTGTTGGGAGCGCGCAGGGACGGTCCGTTTAAGAGCTAAGCTG	GGAGCGCGCAGGGACGGTCC
CD99_+_2609809.23-P1P2	CD99	CCACCTTGTTGGACCCTGGGGGTAGATAACGGTTTAAGAGCTAAGCTG	GACCCTGGGGGTAGATAACG
CD99_+_2609459.23-P1P2	CD99	CCACCTTGTTGGTCCGCTCGCTCACCCGGGGGTTTAAGAGCTAAGCTG	GTCCGCTCGCTCACCCGGGG
CD99_+_2609824.23-P1P2	CD99	CCACCTTGTTGGGACGCAGGTCCCCAAACCCGTTTAAGAGCTAAGCTG	GGACGCAGGTCCCCAAACCC
CD99_+_2609751.23-P1P2	CD99	CCACCTTGTTGGTAAGAAGGTCCCCTAGATTGTTTAAGAGCTAAGCTG	GTAAGAAGGTCCCCTAGATT
CD99L2_-_150066710.23-P1P2	CD99L2	CCACCTTGTTGGGGACAGCTGTTGTCACCAGGTTTAAGAGCTAAGCTG	GGGACAGCTGTTGTCACCAG
CD99L2_-_150067123.23-P1P2	CD99L2	CCACCTTGTTGGGCGAGAGCGCCCGAAGGGGGTTTAAGAGCTAAGCTG	GGCGAGAGCGCCCGAAGGGG
CD99L2_+_150066704.23-P1P2	CD99L2	CCACCTTGTTGGGAACGAGCAGGTGTACCACGTTTAAGAGCTAAGCTG	GGAACGAGCAGGTGTACCAC
CD99L2_-_150067120.23-P1P2	CD99L2	CCACCTTGTTGGAGCGCGAGAGCGCCCGAAGGTTTAAGAGCTAAGCTG	GAGCGCGAGAGCGCCCGAAG
CD99L2_-_150066903.23-P1P2	CD99L2	CCACCTTGTTGGCAGCCACCGCAGGCCCGAGGTTTAAGAGCTAAGCTG	GCAGCCACCGCAGGCCCGAG
CDCP1_+_45187866.23-P1P2	CDCP1	CCACCTTGTTGGCGCGCAGGTGAGTGAGCCAGTTTAAGAGCTAAGCTG	GCGCGCAGGTGAGTGAGCCA
CDCP1_-_45187484.23-P1P2	CDCP1	CCACCTTGTTGGGGCAAGGTTGACTCCAGGAGTTTAAGAGCTAAGCTG	GGGCAAGGTTGACTCCAGGA
CDCP1_-_45187817.23-P1P2	CDCP1	CCACCTTGTTGGGCCTCGGTGGGGAAAACGAGTTTAAGAGCTAAGCTG	GGCCTCGGTGGGGAAAACGA
CDCP1_-_45187480.23-P1P2	CDCP1	CCACCTTGTTGGCGAGGGCAAGGTTGACTCCGTTTAAGAGCTAAGCTG	GCGAGGGCAAGGTTGACTCC
CDCP1_-_45187430.23-P1P2	CDCP1	CCACCTTGTTGGCTCATCCTCCCGGACCGGGGTTTAAGAGCTAAGCTG	GCTCATCCTCCCGGACCGGG
CDH10_-_24645035.23-P1P2	CDH10	CCACCTTGTTGGTGCAGCACTCGCCATGGGAGTTTAAGAGCTAAGCTG	GTGCAGCACTCGCCATGGGA
CDH10_-_24645031.23-P1P2	CDH10	CCACCTTGTTGGGAGCTGCAGCACTCGCCATGTTTAAGAGCTAAGCTG	GGAGCTGCAGCACTCGCCAT
CDH10_-_24644891.23-P1P2	CDH10	CCACCTTGTTGGAGGGAACCGAAGAAAACGGGTTTAAGAGCTAAGCTG	GAGGGAACCGAAGAAAACGG
CDH10_+_24644697.23-P1P2	CDH10	CCACCTTGTTGGAGAAGCTGATAAAAAAGGTGTTTAAGAGCTAAGCTG	GAGAAGCTGATAAAAAAGGT
CDH10_-_24645119.23-P1P2	CDH10	CCACCTTGTTGGGAGGGCGCATCCGAGAGGAGTTTAAGAGCTAAGCTG	GGAGGGCGCATCCGAGAGGA
CDH11_-_65155534.23-P1P2	CDH11	CCACCTTGTTGGCCGGAGCCAGGGAGAGTCGGTTTAAGAGCTAAGCTG	GCCGGAGCCAGGGAGAGTCG
CDH11_+_65155957.23-P1P2	CDH11	CCACCTTGTTGGCGCTCGGCGGCTCATTCCGGTTTAAGAGCTAAGCTG	GCGCTCGGCGGCTCATTCCG
CDH11_-_65155891.23-P1P2	CDH11	CCACCTTGTTGGGGTCCCATTCACAAGTCAGGTTTAAGAGCTAAGCTG	GGGTCCCATTCACAAGTCAG
CDH11_+_65155928.23-P1P2	CDH11	CCACCTTGTTGGCAGCTGAGGGGAGCGTCGCGTTTAAGAGCTAAGCTG	GCAGCTGAGGGGAGCGTCGC
CDH11_-_65155894.23-P1P2	CDH11	CCACCTTGTTGGCCCATTCACAAGTCAGCGGGTTTAAGAGCTAAGCTG	GCCCATTCACAAGTCAGCGG
CDH12_+_22853029.23-P1P2	CDH12	CCACCTTGTTGGACGAAGCTGCACACAGATCGTTTAAGAGCTAAGCTG	GACGAAGCTGCACACAGATC
CDH12_-_22853485.23-P1P2	CDH12	CCACCTTGTTGGGGCTGGAGCTCAACTGCAGGTTTAAGAGCTAAGCTG	GGGCTGGAGCTCAACTGCAG
CDH12_+_22853016.23-P1P2	CDH12	CCACCTTGTTGGCAGATCTGGCAGCTGAATTGTTTAAGAGCTAAGCTG	GCAGATCTGGCAGCTGAATT
CDH12_+_22852942.23-P1P2	CDH12	CCACCTTGTTGGCTGGTCCTCAGACCGTGAGGTTTAAGAGCTAAGCTG	GCTGGTCCTCAGACCGTGAG
CDH12_-_22853181.23-P1P2	CDH12	CCACCTTGTTGGCCTTACCTGATGGCAGAAAGTTTAAGAGCTAAGCTG	GCCTTACCTGATGGCAGAAA
CDH13_+_82660671.23-P1P2	CDH13	CCACCTTGTTGGTCCGACTAGAAGCGCCCGGGTTTAAGAGCTAAGCTG	GTCCGACTAGAAGCGCCCGG
CDH13_+_82661015.23-P1P2	CDH13	CCACCTTGTTGGCTGCTAGCAAAAAAGGACTGTTTAAGAGCTAAGCTG	GCTGCTAGCAAAAAAGGACT
CDH13_-_82660879.23-P1P2	CDH13	CCACCTTGTTGGGACAGATCGGGGCTCGGTAGTTTAAGAGCTAAGCTG	GGACAGATCGGGGCTCGGTA
CDH13_-_82660869.23-P1P2	CDH13	CCACCTTGTTGGCGGCGGCGAAGACAGATCGGTTTAAGAGCTAAGCTG	GCGGCGGCGAAGACAGATCG
CDH13_-_82660755.23-P1P2	CDH13	CCACCTTGTTGGTGTCCCAGGTAGGGAAGAGGTTTAAGAGCTAAGCTG	GTGTCCCAGGTAGGGAAGAG
CDH15_+_89238234.23-P1P2	CDH15	CCACCTTGTTGGAGGAACGCGGCGTCCATCGGTTTAAGAGCTAAGCTG	GAGGAACGCGGCGTCCATCG
CDH15_-_89238216.23-P1P2	CDH15	CCACCTTGTTGGTCGGGTCGCGGGTGCACTCGTTTAAGAGCTAAGCTG	GTCGGGTCGCGGGTGCACTC
CDH15_+_89238550.23-P1P2	CDH15	CCACCTTGTTGGAGAGAGGGCACGGCTACCTGTTTAAGAGCTAAGCTG	GAGAGAGGGCACGGCTACCT
CDH15_+_89238314.23-P1P2	CDH15	CCACCTTGTTGGTGTCCCGCAGCGTCGAGGGGTTTAAGAGCTAAGCTG	GTGTCCCGCAGCGTCGAGGG
CDH15_+_89238262.23-P1P2	CDH15	CCACCTTGTTGGTACCTGGGCCAACAGCCCGGTTTAAGAGCTAAGCTG	GTACCTGGGCCAACAGCCCG
CDH16_+_66952705.23-P1P2	CDH16	CCACCTTGTTGGGCCAGTCTTGGGCGCTGGAGTTTAAGAGCTAAGCTG	GGCCAGTCTTGGGCGCTGGA
CDH16_+_66952539.23-P1P2	CDH16	CCACCTTGTTGGCTGCCCAGCTCCATGACAAGTTTAAGAGCTAAGCTG	GCTGCCCAGCTCCATGACAA
CDH16_+_66952729.23-P1P2	CDH16	CCACCTTGTTGGTTGCTTGGCAGCTGGACCAGTTTAAGAGCTAAGCTG	GTTGCTTGGCAGCTGGACCA
CDH16_-_66952725.23-P1P2	CDH16	CCACCTTGTTGGACCCTCCAGCGCCCAAGACGTTTAAGAGCTAAGCTG	GACCCTCCAGCGCCCAAGAC
CDH16_-_66952734.23-P1P2	CDH16	CCACCTTGTTGGCGCCCAAGACTGGCTCCCTGTTTAAGAGCTAAGCTG	GCGCCCAAGACTGGCTCCCT
CDH17_+_95220792.23-P1	CDH17	CCACCTTGTTGGGAAGAGGGAGTGTTCCCGGGTTTAAGAGCTAAGCTG	GGAAGAGGGAGTGTTCCCGG
CDH17_+_95220752.23-P1	CDH17	CCACCTTGTTGGAAGAGTCTCGACCACTGAAGTTTAAGAGCTAAGCTG	GAAGAGTCTCGACCACTGAA
CDH17_+_95220347.23-P1	CDH17	CCACCTTGTTGGCTGGTCTTAAGATGCTCTAGTTTAAGAGCTAAGCTG	GCTGGTCTTAAGATGCTCTA
CDH17_-_95220799.23-P1	CDH17	CCACCTTGTTGGCGACTGGAGTATCTCCCCCGTTTAAGAGCTAAGCTG	GCGACTGGAGTATCTCCCCC
CDH17_-_95220762.23-P1	CDH17	CCACCTTGTTGGGTCCTTTTCTTCCATTCAGGTTTAAGAGCTAAGCTG	GGTCCTTTTCTTCCATTCAG
CDH17_-_95229455.23-P2	CDH17	CCACCTTGTTGGGCCCCAATCAGACAAGCGGGTTTAAGAGCTAAGCTG	GGCCCCAATCAGACAAGCGG
CDH17_-_95229089.23-P2	CDH17	CCACCTTGTTGGCTGGCCGCATAGAGCCACTGTTTAAGAGCTAAGCTG	GCTGGCCGCATAGAGCCACT
CDH17_-_95229452.23-P2	CDH17	CCACCTTGTTGGGGAGCCCCAATCAGACAAGGTTTAAGAGCTAAGCTG	GGGAGCCCCAATCAGACAAG
CDH17_+_95229072.23-P2	CDH17	CCACCTTGTTGGcaatcccAGTGGCTCTATGGTTTAAGAGCTAAGCTG	GcaatcccAGTGGCTCTATG
CDH17_+_95229144.23-P2	CDH17	CCACCTTGTTGGggctgcacgttggaaccaaGTTTAAGAGCTAAGCTG	Gggctgcacgttggaaccaa
CDH18_-_19987916.23-P1P2	CDH18	CCACCTTGTTGGTCAGGGAAGACAACAGCACGTTTAAGAGCTAAGCTG	GTCAGGGAAGACAACAGCAC
CDH18_+_19988286.23-P1P2	CDH18	CCACCTTGTTGGAGTCTGGGCTTTCCGAGGAGTTTAAGAGCTAAGCTG	GAGTCTGGGCTTTCCGAGGA
CDH18_-_19988219.23-P1P2	CDH18	CCACCTTGTTGGGCGGACTTGCCCTAACTGGGTTTAAGAGCTAAGCTG	GGCGGACTTGCCCTAACTGG
CDH18_+_19988056.23-P1P2	CDH18	CCACCTTGTTGGATGGGTTTCACAGGATCGAGTTTAAGAGCTAAGCTG	GATGGGTTTCACAGGATCGA
CDH18_-_19988295.23-P1P2	CDH18	CCACCTTGTTGGCACAGCTGCTCGCCGTCCTGTTTAAGAGCTAAGCTG	GCACAGCTGCTCGCCGTCCT
CDH19_-_64271266.23-P1P2	CDH19	CCACCTTGTTGGTGGACACATAAGGAAGAGTGTTTAAGAGCTAAGCTG	GTGGACACATAAGGAAGAGT
CDH19_+_64271326.23-P1P2	CDH19	CCACCTTGTTGGCACAAGCGTCTGTAACTCTGTTTAAGAGCTAAGCTG	GCACAAGCGTCTGTAACTCT
CDH19_-_64271257.23-P1P2	CDH19	CCACCTTGTTGGACTTCGTGTTGGACACATAGTTTAAGAGCTAAGCTG	GACTTCGTGTTGGACACATA
CDH19_-_64271027.23-P1P2	CDH19	CCACCTTGTTGGTCAGTACAAGTACACATCAGTTTAAGAGCTAAGCTG	GTCAGTACAAGTACACATCA
CDH19_+_64271320.23-P1P2	CDH19	CCACCTTGTTGGCGTCTGTAACTCTGGGCAAGTTTAAGAGCTAAGCTG	GCGTCTGTAACTCTGGGCAA
CDH2_-_25757092.23-P1P2	CDH2	CCACCTTGTTGGCAACAGCGGCGCGGAGAAAGTTTAAGAGCTAAGCTG	GCAACAGCGGCGCGGAGAAA
CDH2_-_25757019.23-P1P2	CDH2	CCACCTTGTTGGGGGCCGAGCGAAGAGCCGGGTTTAAGAGCTAAGCTG	GGGGCCGAGCGAAGAGCCGG
CDH2_-_25756711.23-P1P2	CDH2	CCACCTTGTTGGCCTAGAGCCCCGCCAGGAAGTTTAAGAGCTAAGCTG	GCCTAGAGCCCCGCCAGGAA
CDH2_-_25756990.23-P1P2	CDH2	CCACCTTGTTGGCCCGCTATCCGGCACATGGGTTTAAGAGCTAAGCTG	GCCCGCTATCCGGCACATGG
CDH2_-_25757016.23-P1P2	CDH2	CCACCTTGTTGGGAGGGGCCGAGCGAAGAGCGTTTAAGAGCTAAGCTG	GGAGGGGCCGAGCGAAGAGC
CDH20_-_59001082.23-P1P2	CDH20	CCACCTTGTTGGTAACGCAGAGGGCTCGGGTGTTTAAGAGCTAAGCTG	GTAACGCAGAGGGCTCGGGT
CDH20_-_59000742.23-P1P2	CDH20	CCACCTTGTTGGGGACGGTGACCGCGACCAGGTTTAAGAGCTAAGCTG	GGGACGGTGACCGCGACCAG
CDH20_+_59001196.23-P1P2	CDH20	CCACCTTGTTGGGCCGGTAGGCTCGTCGAGGGTTTAAGAGCTAAGCTG	GGCCGGTAGGCTCGTCGAGG
CDH20_-_59000695.23-P1P2	CDH20	CCACCTTGTTGGTAGGGAAGGCGCGAGGGAGGTTTAAGAGCTAAGCTG	GTAGGGAAGGCGCGAGGGAG
CDH20_-_59000682.23-P1P2	CDH20	CCACCTTGTTGGCAGCCACTCCTGCTAGGGAGTTTAAGAGCTAAGCTG	GCAGCCACTCCTGCTAGGGA
CDH22_-_44937014.23-P1P2	CDH22	CCACCTTGTTGGgccgcccgcAGGAGCCGGAGTTTAAGAGCTAAGCTG	GgccgcccgcAGGAGCCGGA
CDH22_-_44936656.23-P1P2	CDH22	CCACCTTGTTGGCGGGCTTCGGGCCGAGAGGGTTTAAGAGCTAAGCTG	GCGGGCTTCGGGCCGAGAGG
CDH22_-_44936629.23-P1P2	CDH22	CCACCTTGTTGGCGAGGTTGTGGGGACGGGTGTTTAAGAGCTAAGCTG	GCGAGGTTGTGGGGACGGGT
CDH22_+_44936927.23-P1P2	CDH22	CCACCTTGTTGGcccACGCAGCGTCCCGAGGGTTTAAGAGCTAAGCTG	GcccACGCAGCGTCCCGAGG
CDH22_-_44936726.23-P1P2	CDH22	CCACCTTGTTGGCCCTCCCGGCCGAGAGGAGGTTTAAGAGCTAAGCTG	GCCCTCCCGGCCGAGAGGAG
CDH23_-_73156723.23-P1P2	CDH23	CCACCTTGTTGGGCTCGGGAGAGAGGGACGCGTTTAAGAGCTAAGCTG	GGCTCGGGAGAGAGGGACGC
CDH23_-_73156765.23-P1P2	CDH23	CCACCTTGTTGGTAGAGGACGCGTCCGACGGGTTTAAGAGCTAAGCTG	GTAGAGGACGCGTCCGACGG
CDH23_+_73156939.23-P1P2	CDH23	CCACCTTGTTGGCGGCGCGAAGGCTCATCCGGTTTAAGAGCTAAGCTG	GCGGCGCGAAGGCTCATCCG
CDH23_+_73157176.23-P1P2	CDH23	CCACCTTGTTGGGCGCTGGGAACAAGTGGTTGTTTAAGAGCTAAGCTG	GGCGCTGGGAACAAGTGGTT
CDH23_-_73156693.23-P1P2	CDH23	CCACCTTGTTGGAGTTGATCGCGGACTTGAGGTTTAAGAGCTAAGCTG	GAGTTGATCGCGGACTTGAG
CDH24_+_23526558.23-P1P2	CDH24	CCACCTTGTTGGGAATCCGCGGAGGGGTAGGGTTTAAGAGCTAAGCTG	GGAATCCGCGGAGGGGTAGG
CDH24_-_23524980.23-P1P2	CDH24	CCACCTTGTTGGGGCTCTGTTCACTGGCCCTGTTTAAGAGCTAAGCTG	GGGCTCTGTTCACTGGCCCT
CDH24_-_23526679.23-P1P2	CDH24	CCACCTTGTTGGccccgtcgccgggtcccggGTTTAAGAGCTAAGCTG	Gccccgtcgccgggtcccgg
CDH24_-_23526752.23-P1P2	CDH24	CCACCTTGTTGGGCGGCCCCGGCGAGAACAAGTTTAAGAGCTAAGCTG	GGCGGCCCCGGCGAGAACAA
CDH24_+_23526692.23-P1P2	CDH24	CCACCTTGTTGGCCGCGGCGCCCGCTCCAATGTTTAAGAGCTAAGCTG	GCCGCGGCGCCCGCTCCAAT
CDH26_-_58533511.23-ENST00000348616.4	CDH26	CCACCTTGTTGGTGTACGTGCAGGACCATGGGTTTAAGAGCTAAGCTG	GTGTACGTGCAGGACCATGG
CDH26_+_58533525.23-ENST00000348616.4	CDH26	CCACCTTGTTGGTAGAGTTCCTAGGAAGGGTGTTTAAGAGCTAAGCTG	GTAGAGTTCCTAGGAAGGGT
CDH26_+_58533916.23-ENST00000348616.4	CDH26	CCACCTTGTTGGCCCTCCCTTAGCCTAGAAGGTTTAAGAGCTAAGCTG	GCCCTCCCTTAGCCTAGAAG
CDH26_-_58533801.23-ENST00000348616.4	CDH26	CCACCTTGTTGGTATGGCCATGAGATCCGGGGTTTAAGAGCTAAGCTG	GTATGGCCATGAGATCCGGG
CDH26_+_58533534.23-ENST00000348616.4	CDH26	CCACCTTGTTGGTGCCACAAGTAGAGTTCCTGTTTAAGAGCTAAGCTG	GTGCCACAAGTAGAGTTCCT
CDH3_-_68679253.23-P1P2	CDH3	CCACCTTGTTGGGAACACCGGCCCGCCGTCGGTTTAAGAGCTAAGCTG	GGAACACCGGCCCGCCGTCG
CDH3_+_68679290.23-P1P2	CDH3	CCACCTTGTTGGAGACGCGAGAGGTCCACGAGTTTAAGAGCTAAGCTG	GAGACGCGAGAGGTCCACGA
CDH3_-_68679218.23-P1P2	CDH3	CCACCTTGTTGGGGGGCTGCGGTGCTCAAAGGTTTAAGAGCTAAGCTG	GGGGGCTGCGGTGCTCAAAG
CDH3_-_68679592.23-P1P2	CDH3	CCACCTTGTTGGTGCCGGGCGGTCTTCAGGGGTTTAAGAGCTAAGCTG	GTGCCGGGCGGTCTTCAGGG
CDH3_-_68679680.23-P1P2	CDH3	CCACCTTGTTGGTCCTCAGGGTGGAACCGCAGTTTAAGAGCTAAGCTG	GTCCTCAGGGTGGAACCGCA
CDH4_-_59827320.23-P1P2	CDH4	CCACCTTGTTGGCTCCGAGCGCGCGGAACAGGTTTAAGAGCTAAGCTG	GCTCCGAGCGCGCGGAACAG
CDH4_-_59827728.23-P1P2	CDH4	CCACCTTGTTGGCACCCGGCGGGGCTCTCCCGTTTAAGAGCTAAGCTG	GCACCCGGCGGGGCTCTCCC
CDH4_-_59827326.23-P1P2	CDH4	CCACCTTGTTGGGCGCGCGGAACAGAGGCGCGTTTAAGAGCTAAGCTG	GGCGCGCGGAACAGAGGCGC
CDH4_-_59827329.23-P1P2	CDH4	CCACCTTGTTGGCGCGGAACAGAGGCGCGGGGTTTAAGAGCTAAGCTG	GCGCGGAACAGAGGCGCGGG
CDH4_-_59827353.23-P1P2	CDH4	CCACCTTGTTGGGCGAGGCCGGCGGACGCACGTTTAAGAGCTAAGCTG	GGCGAGGCCGGCGGACGCAC
CDH6_+_31194316.23-P1P2	CDH6	CCACCTTGTTGGCCTCTGCCGGCGTAGAGAAGTTTAAGAGCTAAGCTG	GCCTCTGCCGGCGTAGAGAA
CDH6_-_31193900.23-P1P2	CDH6	CCACCTTGTTGGTCAGCCGCGACAGCAAGAAGTTTAAGAGCTAAGCTG	GTCAGCCGCGACAGCAAGAA
CDH6_+_31194298.23-P1P2	CDH6	CCACCTTGTTGGAAGGCAGCGGGTTCTTCTGGTTTAAGAGCTAAGCTG	GAAGGCAGCGGGTTCTTCTG
CDH6_+_31194188.23-P1P2	CDH6	CCACCTTGTTGGCGGCGTCGGTCCTGAGCAGGTTTAAGAGCTAAGCTG	GCGGCGTCGGTCCTGAGCAG
CDH6_+_31194087.23-P1P2	CDH6	CCACCTTGTTGGCGGCGCGGCACCCACCGGGGTTTAAGAGCTAAGCTG	GCGGCGCGGCACCCACCGGG
CDH7_+_63418242.23-P1P2	CDH7	CCACCTTGTTGGCGCGCGCGGGGCAGACTGGGTTTAAGAGCTAAGCTG	GCGCGCGCGGGGCAGACTGG
CDH7_+_63417874.23-P1P2	CDH7	CCACCTTGTTGGCCTCCCAGAGACCCGGTGGGTTTAAGAGCTAAGCTG	GCCTCCCAGAGACCCGGTGG
CDH7_+_63418039.23-P1P2	CDH7	CCACCTTGTTGGGAGCGCGCGGCCagagagaGTTTAAGAGCTAAGCTG	GGAGCGCGCGGCCagagaga
CDH7_-_63417912.23-P1P2	CDH7	CCACCTTGTTGGGGAGGCGCCGAAGTCTCAGGTTTAAGAGCTAAGCTG	GGGAGGCGCCGAAGTCTCAG
CDH7_-_63418706.23-P1P2	CDH7	CCACCTTGTTGGTGCAGCGGCAAACATGGGCGTTTAAGAGCTAAGCTG	GTGCAGCGGCAAACATGGGC
CDH8_-_62069900.23-P1P2	CDH8	CCACCTTGTTGGGCGCGCAAGGTGTCCGAAGGTTTAAGAGCTAAGCTG	GGCGCGCAAGGTGTCCGAAG
CDH8_+_62070102.23-P1P2	CDH8	CCACCTTGTTGGAGGCATGAACGGAATCCGGGTTTAAGAGCTAAGCTG	GAGGCATGAACGGAATCCGG
CDH8_+_62070121.23-P1P2	CDH8	CCACCTTGTTGGCAAGCCCTGTAGCTCCGAGGTTTAAGAGCTAAGCTG	GCAAGCCCTGTAGCTCCGAG
CDH8_+_62070112.23-P1P2	CDH8	CCACCTTGTTGGTAGCTCCGAGAGGCATGAAGTTTAAGAGCTAAGCTG	GTAGCTCCGAGAGGCATGAA
CDH8_-_62069952.23-P1P2	CDH8	CCACCTTGTTGGCTGGATAGTCGGAACATAGGTTTAAGAGCTAAGCTG	GCTGGATAGTCGGAACATAG
CDH9_+_27038617.23-P1P2	CDH9	CCACCTTGTTGGACCGAGACAGAAGCAACAAGTTTAAGAGCTAAGCTG	GACCGAGACAGAAGCAACAA
CDH9_+_27038596.23-P1P2	CDH9	CCACCTTGTTGGGAACTGTCAGTGCGGAGTAGTTTAAGAGCTAAGCTG	GGAACTGTCAGTGCGGAGTA
CDH9_-_27038334.23-P1P2	CDH9	CCACCTTGTTGGCTATAAAAAGAGCTTGAGTGTTTAAGAGCTAAGCTG	GCTATAAAAAGAGCTTGAGT
CDH9_+_27038649.23-P1P2	CDH9	CCACCTTGTTGGCTGTGAAGATACTATAAAAGTTTAAGAGCTAAGCTG	GCTGTGAAGATACTATAAAA
CDH9_+_27038603.23-P1P2	CDH9	CCACCTTGTTGGAACAACGGAACTGTCAGTGGTTTAAGAGCTAAGCTG	GAACAACGGAACTGTCAGTG
CDHR1_+_85954334.23-P1P2	CDHR1	CCACCTTGTTGGGGGCGCTAAGAGGATGACAGTTTAAGAGCTAAGCTG	GGGGCGCTAAGAGGATGACA
CDHR1_+_85954290.23-P1P2	CDHR1	CCACCTTGTTGGGCCTGACGAGACCAATTAGGTTTAAGAGCTAAGCTG	GGCCTGACGAGACCAATTAG
CDHR1_+_85954415.23-P1P2	CDHR1	CCACCTTGTTGGAGGGCAGAGACCACAATGGGTTTAAGAGCTAAGCTG	GAGGGCAGAGACCACAATGG
CDHR1_+_85954353.23-P1P2	CDHR1	CCACCTTGTTGGGGAGCGGCGGGTGGCGTGAGTTTAAGAGCTAAGCTG	GGGAGCGGCGGGTGGCGTGA
CDHR1_+_85954801.23-P1P2	CDHR1	CCACCTTGTTGGGTCCGGGCGCCAAACCCTGGTTTAAGAGCTAAGCTG	GGTCCGGGCGCCAAACCCTG
CDHR3_-_105603736.23-ENST00000317716.9,ENST00000542731.1	CDHR3	CCACCTTGTTGGCAGGCTGTGGCTAATGTGCGTTTAAGAGCTAAGCTG	GCAGGCTGTGGCTAATGTGC
CDHR3_-_105603718.23-ENST00000317716.9,ENST00000542731.1	CDHR3	CCACCTTGTTGGTGGGTGTGAGACGGGATTCGTTTAAGAGCTAAGCTG	GTGGGTGTGAGACGGGATTC
CDHR3_+_105603967.23-ENST00000317716.9,ENST00000542731.1	CDHR3	CCACCTTGTTGGGCTCCTACCTGGTCCCCCAGTTTAAGAGCTAAGCTG	GGCTCCTACCTGGTCCCCCA
CDHR3_-_105604198.23-ENST00000317716.9,ENST00000542731.1	CDHR3	CCACCTTGTTGGAGGCTCGTAGGGCAACTTGGTTTAAGAGCTAAGCTG	GAGGCTCGTAGGGCAACTTG
CDHR3_+_105603899.23-ENST00000317716.9,ENST00000542731.1	CDHR3	CCACCTTGTTGGAATTGAACAAGCCTCCCAGGTTTAAGAGCTAAGCTG	GAATTGAACAAGCCTCCCAG
CDHR4_-_49837218.23-P1P2	CDHR4	CCACCTTGTTGGAGAGACCACCGGAGCAAAGGTTTAAGAGCTAAGCTG	GAGAGACCACCGGAGCAAAG
CDHR4_-_49837171.23-P1P2	CDHR4	CCACCTTGTTGGGGACTCCAAGGGAAAACTAGTTTAAGAGCTAAGCTG	GGGACTCCAAGGGAAAACTA
CDHR4_-_49837046.23-P1P2	CDHR4	CCACCTTGTTGGGGGAGTGAGAACTTGACTGGTTTAAGAGCTAAGCTG	GGGGAGTGAGAACTTGACTG
CDHR4_+_49837190.23-P1P2	CDHR4	CCACCTTGTTGGGCTCCGGTGGTCTCTGGTGGTTTAAGAGCTAAGCTG	GGCTCCGGTGGTCTCTGGTG
CDHR4_-_49836823.23-P1P2	CDHR4	CCACCTTGTTGGAAACTGAAGGACTGTGCCAGTTTAAGAGCTAAGCTG	GAAACTGAAGGACTGTGCCA
CDHR5_+_624896.23-P1P2	CDHR5	CCACCTTGTTGGGGTGACAGCCGCCAAGATGGTTTAAGAGCTAAGCTG	GGGTGACAGCCGCCAAGATG
CDHR5_-_624874.23-P1P2	CDHR5	CCACCTTGTTGGGCAGCCCGGTGAACAGCAGGTTTAAGAGCTAAGCTG	GGCAGCCCGGTGAACAGCAG
CDHR5_-_624476.23-P1P2	CDHR5	CCACCTTGTTGGCCGCAGGCATAGAACTCCTGTTTAAGAGCTAAGCTG	GCCGCAGGCATAGAACTCCT
CDHR5_-_624943.23-P1P2	CDHR5	CCACCTTGTTGGAGGAGGGTCTGAGCGGGTCGTTTAAGAGCTAAGCTG	GAGGAGGGTCTGAGCGGGTC
CDHR5_-_624877.23-P1P2	CDHR5	CCACCTTGTTGGGCCCGGTGAACAGCAGGGGGTTTAAGAGCTAAGCTG	GGCCCGGTGAACAGCAGGGG
CDON_+_125932689.23-P1P2	CDON	CCACCTTGTTGGGGCTAGGTGCGAGGAGACCGTTTAAGAGCTAAGCTG	GGGCTAGGTGCGAGGAGACC
CDON_-_125932290.23-P1P2	CDON	CCACCTTGTTGGCCGAGGACGCGGAACGCCGGTTTAAGAGCTAAGCTG	GCCGAGGACGCGGAACGCCG
CDON_+_125932340.23-P1P2	CDON	CCACCTTGTTGGCGTTCCCTGGAGGGCGTGGGTTTAAGAGCTAAGCTG	GCGTTCCCTGGAGGGCGTGG
CDON_+_125932185.23-P1P2	CDON	CCACCTTGTTGGTCTTGACGATGGTCCTCGGGTTTAAGAGCTAAGCTG	GTCTTGACGATGGTCCTCGG
CDON_+_125932348.23-P1P2	CDON	CCACCTTGTTGGCGGGCCGGCGTTCCCTGGAGTTTAAGAGCTAAGCTG	GCGGGCCGGCGTTCCCTGGA
CEACAM1_-_43032571.23-P1	CEACAM1	CCACCTTGTTGGCACCTGTGGAGGAGAGCTTGTTTAAGAGCTAAGCTG	GCACCTGTGGAGGAGAGCTT
CEACAM1_+_43032520.23-P1	CEACAM1	CCACCTTGTTGGGCCAGCAGGAGACACCATGGTTTAAGAGCTAAGCTG	GGCCAGCAGGAGACACCATG
CEACAM1_-_43032561.23-P1	CEACAM1	CCACCTTGTTGGGCCCTGTCTTCACCTGTGGGTTTAAGAGCTAAGCTG	GGCCCTGTCTTCACCTGTGG
CEACAM1_-_43032594.23-P1	CEACAM1	CCACCTTGTTGGTCCAGGAACGCTTCGAGCAGTTTAAGAGCTAAGCTG	GTCCAGGAACGCTTCGAGCA
CEACAM1_+_43032394.23-P1	CEACAM1	CCACCTTGTTGGGAATGGCTAGGGTCCTCTGGTTTAAGAGCTAAGCTG	GGAATGGCTAGGGTCCTCTG
CEACAM1_-_43025183.23-P2	CEACAM1	CCACCTTGTTGGTGCTACACGGGGCTTTCTGGTTTAAGAGCTAAGCTG	GTGCTACACGGGGCTTTCTG
CEACAM1_+_43025380.23-P2	CEACAM1	CCACCTTGTTGGGCATCAACACTAAGATCTGGTTTAAGAGCTAAGCTG	GGCATCAACACTAAGATCTG
CEACAM1_+_43025552.23-P2	CEACAM1	CCACCTTGTTGGAGTACTCCTGGCTTATCAAGTTTAAGAGCTAAGCTG	GAGTACTCCTGGCTTATCAA
CEACAM1_+_43025120.23-P2	CEACAM1	CCACCTTGTTGGGAAGCAGAAAGGGTCCTCAGTTTAAGAGCTAAGCTG	GGAAGCAGAAAGGGTCCTCA
CEACAM1_-_43025224.23-P2	CEACAM1	CCACCTTGTTGGACATTCCAGGCTGGACCTAGTTTAAGAGCTAAGCTG	GACATTCCAGGCTGGACCTA
CEACAM19_-_45175092.23-P1P2	CEACAM19	CCACCTTGTTGGAGCCCCAGCGGTGTCTCTAGTTTAAGAGCTAAGCTG	GAGCCCCAGCGGTGTCTCTA
CEACAM19_+_45175041.23-P1P2	CEACAM19	CCACCTTGTTGGCCCAGCATGCCCTGTCCATGTTTAAGAGCTAAGCTG	GCCCAGCATGCCCTGTCCAT
CEACAM19_+_45175073.23-P1P2	CEACAM19	CCACCTTGTTGGTGCCTTAGAGACACCGCTGGTTTAAGAGCTAAGCTG	GTGCCTTAGAGACACCGCTG
CEACAM19_+_45175119.23-P1P2	CEACAM19	CCACCTTGTTGGGGCCCTGGCTGTCTGAAGTGTTTAAGAGCTAAGCTG	GGGCCCTGGCTGTCTGAAGT
CEACAM19_-_45175029.23-P1P2	CEACAM19	CCACCTTGTTGGCCATCCCAGGGAGTATAGGGTTTAAGAGCTAAGCTG	GCCATCCCAGGGAGTATAGG
CEACAM20_-_45033705.23-P1P2	CEACAM20	CCACCTTGTTGGCTCCCAGGACAGACAGGGGGTTTAAGAGCTAAGCTG	GCTCCCAGGACAGACAGGGG
CEACAM20_+_45033355.23-P1P2	CEACAM20	CCACCTTGTTGGCTCGAGGAAAAAGAGATGGGTTTAAGAGCTAAGCTG	GCTCGAGGAAAAAGAGATGG
CEACAM20_-_45033610.23-P1P2	CEACAM20	CCACCTTGTTGGCAGATACAGTCCTCACTCCGTTTAAGAGCTAAGCTG	GCAGATACAGTCCTCACTCC
CEACAM20_+_45033444.23-P1P2	CEACAM20	CCACCTTGTTGGTCCTTCAGATGCGGGAGGAGTTTAAGAGCTAAGCTG	GTCCTTCAGATGCGGGAGGA
CEACAM20_+_45033526.23-P1P2	CEACAM20	CCACCTTGTTGGTCAGGTGCCGGGACCCATGGTTTAAGAGCTAAGCTG	GTCAGGTGCCGGGACCCATG
CEACAM21_-_42055880.23-P1P2	CEACAM21	CCACCTTGTTGGAAGGGGTGGCTCACCAGGAGTTTAAGAGCTAAGCTG	GAAGGGGTGGCTCACCAGGA
CEACAM21_+_42056140.23-P1P2	CEACAM21	CCACCTTGTTGGcttgagcccaggaataagtGTTTAAGAGCTAAGCTG	Gcttgagcccaggaataagt
CEACAM21_+_42056299.23-P1P2	CEACAM21	CCACCTTGTTGGACGACAATGGACTGTATAAGTTTAAGAGCTAAGCTG	GACGACAATGGACTGTATAA
CEACAM21_+_42056281.23-P1P2	CEACAM21	CCACCTTGTTGGAAGGAAATAAGCAAGTCCAGTTTAAGAGCTAAGCTG	GAAGGAAATAAGCAAGTCCA
CEACAM21_-_42056360.23-P1P2	CEACAM21	CCACCTTGTTGGTGTGATACACCCTCTCATAGTTTAAGAGCTAAGCTG	GTGTGATACACCCTCTCATA
CEACAM3_+_42300540.23-P1P2	CEACAM3	CCACCTTGTTGGTCCAGGAATGCTGTAGTCAGTTTAAGAGCTAAGCTG	GTCCAGGAATGCTGTAGTCA
CEACAM3_+_42301019.23-P1P2	CEACAM3	CCACCTTGTTGGTGGTGGATGAGTTAAGGAGGTTTAAGAGCTAAGCTG	GTGGTGGATGAGTTAAGGAG
CEACAM3_-_42300759.23-P1P2	CEACAM3	CCACCTTGTTGGGGAGGATGGGGCTCTGATAGTTTAAGAGCTAAGCTG	GGGAGGATGGGGCTCTGATA
CEACAM3_-_42300568.23-P1P2	CEACAM3	CCACCTTGTTGGTACAGCATTCCTGGAGCCCGTTTAAGAGCTAAGCTG	GTACAGCATTCCTGGAGCCC
CEACAM3_+_42300980.23-P1P2	CEACAM3	CCACCTTGTTGGGTGGTTGGTGGTCAAAGACGTTTAAGAGCTAAGCTG	GGTGGTTGGTGGTCAAAGAC
CEACAM4_-_42133419.23-P1P2	CEACAM4	CCACCTTGTTGGCTGTGACTGTCGGCTGTCGGTTTAAGAGCTAAGCTG	GCTGTGACTGTCGGCTGTCG
CEACAM4_+_42133197.23-P1P2	CEACAM4	CCACCTTGTTGGTGACTGGGGTCTCTTGGGTGTTTAAGAGCTAAGCTG	GTGACTGGGGTCTCTTGGGT
CEACAM4_+_42133299.23-P1P2	CEACAM4	CCACCTTGTTGGCCTCAGCCGCTCCCCGTGGGTTTAAGAGCTAAGCTG	GCCTCAGCCGCTCCCCGTGG
CEACAM4_+_42133020.23-P1P2	CEACAM4	CCACCTTGTTGGCTCAAGTGTTCTCTCGTCCGTTTAAGAGCTAAGCTG	GCTCAAGTGTTCTCTCGTCC
CEACAM4_-_42133309.23-P1P2	CEACAM4	CCACCTTGTTGGAGGGCCTGTGCCCTCCACGGTTTAAGAGCTAAGCTG	GAGGGCCTGTGCCCTCCACG
CEACAM5_-_42212542.23-P1P2	CEACAM5	CCACCTTGTTGGTGCCCTAGGAAGAGACTCAGTTTAAGAGCTAAGCTG	GTGCCCTAGGAAGAGACTCA
CEACAM5_+_42212565.23-P1P2	CEACAM5	CCACCTTGTTGGCAAGGCTGCTGTGACTGTCGTTTAAGAGCTAAGCTG	GCAAGGCTGCTGTGACTGTC
CEACAM5_-_42212807.23-P1P2	CEACAM5	CCACCTTGTTGGACGGACAGAGGGCTCCTGTGTTTAAGAGCTAAGCTG	GACGGACAGAGGGCTCCTGT
CEACAM5_+_42213012.23-P1P2	CEACAM5	CCACCTTGTTGGTGTCCGCGGTAGGCGGATGGTTTAAGAGCTAAGCTG	GTGTCCGCGGTAGGCGGATG
CEACAM5_+_42212648.23-P1P2	CEACAM5	CCACCTTGTTGGGGGGCCGAGGGAGACTCCAGTTTAAGAGCTAAGCTG	GGGGGCCGAGGGAGACTCCA
CEACAM6_+_42259477.23-P1P2	CEACAM6	CCACCTTGTTGGTCCAGGAATGCTCTGGTCAGTTTAAGAGCTAAGCTG	GTCCAGGAATGCTCTGGTCA
CEACAM6_+_42259933.23-P1P2	CEACAM6	CCACCTTGTTGGACTTCTGATTGGTGAGTAAGTTTAAGAGCTAAGCTG	GACTTCTGATTGGTGAGTAA
CEACAM6_-_42259524.23-P1P2	CEACAM6	CCACCTTGTTGGAAGCTCCTCTACAAAGAGGGTTTAAGAGCTAAGCTG	GAAGCTCCTCTACAAAGAGG
CEACAM6_-_42259521.23-P1P2	CEACAM6	CCACCTTGTTGGCTCAAGCTCCTCTACAAAGGTTTAAGAGCTAAGCTG	GCTCAAGCTCCTCTACAAAG
CEACAM6_-_42259497.23-P1P2	CEACAM6	CCACCTTGTTGGGCCCTGACCAGAGCATTCCGTTTAAGAGCTAAGCTG	GGCCCTGACCAGAGCATTCC
CEACAM7_-_42191683.23-P1P2	CEACAM7	CCACCTTGTTGGGGCCCTCCCTCCACATCCTGTTTAAGAGCTAAGCTG	GGGCCCTCCCTCCACATCCT
CEACAM7_-_42191920.23-P1P2	CEACAM7	CCACCTTGTTGGGTCTGGTGTCCTCTCCCAAGTTTAAGAGCTAAGCTG	GGTCTGGTGTCCTCTCCCAA
CEACAM7_-_42191718.23-P1P2	CEACAM7	CCACCTTGTTGGTGCCTGAGGTTGGTGGCTAGTTTAAGAGCTAAGCTG	GTGCCTGAGGTTGGTGGCTA
CEACAM7_-_42192077.23-P1P2	CEACAM7	CCACCTTGTTGGATGCACACTCTGTATGGACGTTTAAGAGCTAAGCTG	GATGCACACTCTGTATGGAC
CEACAM7_-_42192086.23-P1P2	CEACAM7	CCACCTTGTTGGCTGTATGGACAGGCTGAAGGTTTAAGAGCTAAGCTG	GCTGTATGGACAGGCTGAAG
CEACAM8_-_43098962.23-P1P2	CEACAM8	CCACCTTGTTGGGATGCGCCATCTGCAGGAAGTTTAAGAGCTAAGCTG	GGATGCGCCATCTGCAGGAA
CEACAM8_+_43098795.23-P1P2	CEACAM8	CCACCTTGTTGGTCTGTTGGAGCCTTAATAGGTTTAAGAGCTAAGCTG	GTCTGTTGGAGCCTTAATAG
CEACAM8_+_43098562.23-P1P2	CEACAM8	CCACCTTGTTGGACATTGGCAAATAAGCCTCGTTTAAGAGCTAAGCTG	GACATTGGCAAATAAGCCTC
CEACAM8_-_43098596.23-P1P2	CEACAM8	CCACCTTGTTGGTGCCAATGTCTGACATTGTGTTTAAGAGCTAAGCTG	GTGCCAATGTCTGACATTGT
CEACAM8_+_43098577.23-P1P2	CEACAM8	CCACCTTGTTGGAGCCAACAATGTCAGACATGTTTAAGAGCTAAGCTG	GAGCCAACAATGTCAGACAT
CELSR1_-_46933487.23-P1P2	CELSR1	CCACCTTGTTGGCTCCGCGCCGCGCAGACCCGTTTAAGAGCTAAGCTG	GCTCCGCGCCGCGCAGACCC
CELSR1_-_46933462.23-P1P2	CELSR1	CCACCTTGTTGGTGAGTTCCCGGAGCGGGCTGTTTAAGAGCTAAGCTG	GTGAGTTCCCGGAGCGGGCT
CELSR1_+_46933501.23-P1P2	CELSR1	CCACCTTGTTGGcgggCCAAGCGCACCGCCCGTTTAAGAGCTAAGCTG	GcgggCCAAGCGCACCGCCC
CELSR1_-_46933325.23-P1P2	CELSR1	CCACCTTGTTGGTCCTCCGCGCGTCCCGGGAGTTTAAGAGCTAAGCTG	GTCCTCCGCGCGTCCCGGGA
CELSR1_-_46933345.23-P1P2	CELSR1	CCACCTTGTTGGGGCGCCGCGCATCAACCTGGTTTAAGAGCTAAGCTG	GGGCGCCGCGCATCAACCTG
CELSR2_+_109792147.23-P1	CELSR2	CCACCTTGTTGGGAGCTCTGCAGAGTCGCGGGTTTAAGAGCTAAGCTG	GGAGCTCTGCAGAGTCGCGG
CELSR2_+_109792590.23-P1	CELSR2	CCACCTTGTTGGCCAGGGCGCCAGTCCCCGGGTTTAAGAGCTAAGCTG	GCCAGGGCGCCAGTCCCCGG
CELSR2_+_109792150.23-P1	CELSR2	CCACCTTGTTGGGGCGAGCTCTGCAGAGTCGGTTTAAGAGCTAAGCTG	GGGCGAGCTCTGCAGAGTCG
CELSR2_-_109792238.23-P1	CELSR2	CCACCTTGTTGGcggcgacaggcagcagccgGTTTAAGAGCTAAGCTG	Gcggcgacaggcagcagccg
CELSR2_-_109792347.23-P1	CELSR2	CCACCTTGTTGGCAGGTGGGCGATCCCATAGGTTTAAGAGCTAAGCTG	GCAGGTGGGCGATCCCATAG
CELSR2_-_109807268.23-P2	CELSR2	CCACCTTGTTGGCAGGTATgctaaggatccaGTTTAAGAGCTAAGCTG	GCAGGTATgctaaggatcca
CELSR2_+_109806841.23-P2	CELSR2	CCACCTTGTTGGCCATAATCGAAGGACAGAAGTTTAAGAGCTAAGCTG	GCCATAATCGAAGGACAGAA
CELSR2_+_109806890.23-P2	CELSR2	CCACCTTGTTGGGTGCAGACCATGCAGCCGGGTTTAAGAGCTAAGCTG	GGTGCAGACCATGCAGCCGG
CELSR2_+_109806850.23-P2	CELSR2	CCACCTTGTTGGCTCTGCTGCCCATAATCGAGTTTAAGAGCTAAGCTG	GCTCTGCTGCCCATAATCGA
CELSR2_-_109806930.23-P2	CELSR2	CCACCTTGTTGGCACCTGAGCAACATAACAGGTTTAAGAGCTAAGCTG	GCACCTGAGCAACATAACAG
CELSR3_+_48699894.23-P1P2	CELSR3	CCACCTTGTTGGGGCCAAGGGCGCATATCGGGTTTAAGAGCTAAGCTG	GGGCCAAGGGCGCATATCGG
CELSR3_-_48699924.23-P1P2	CELSR3	CCACCTTGTTGGTGCGCCCTTGGCCCCGTAGGTTTAAGAGCTAAGCTG	GTGCGCCCTTGGCCCCGTAG
CELSR3_+_48700309.23-P1P2	CELSR3	CCACCTTGTTGGGCCGGGAGCCATGTTGGAGGTTTAAGAGCTAAGCTG	GGCCGGGAGCCATGTTGGAG
CELSR3_-_48699888.23-P1P2	CELSR3	CCACCTTGTTGGGACTCCGGACAAAGAGCTAGTTTAAGAGCTAAGCTG	GGACTCCGGACAAAGAGCTA
CELSR3_+_48699891.23-P1P2	CELSR3	CCACCTTGTTGGCAAGGGCGCATATCGGTGGGTTTAAGAGCTAAGCTG	GCAAGGGCGCATATCGGTGG
CETP_+_56995875.23-P1P2	CETP	CCACCTTGTTGGCAGCATGGTTATCAGGCAGGTTTAAGAGCTAAGCTG	GCAGCATGGTTATCAGGCAG
CETP_+_56995934.23-P1P2	CETP	CCACCTTGTTGGGTGCCTTTGGAGCAGGCATGTTTAAGAGCTAAGCTG	GGTGCCTTTGGAGCAGGCAT
CETP_+_56996058.23-P1P2	CETP	CCACCTTGTTGGGGGAGGCTCCTGGCATAGTGTTTAAGAGCTAAGCTG	GGGGAGGCTCCTGGCATAGT
CETP_+_56995913.23-P1P2	CETP	CCACCTTGTTGGGCATTGCCCAGCAGGGCCAGTTTAAGAGCTAAGCTG	GGCATTGCCCAGCAGGGCCA
CETP_-_56995842.23-P1P2	CETP	CCACCTTGTTGGTGGGCGGACATACATATACGTTTAAGAGCTAAGCTG	GTGGGCGGACATACATATAC
CFC1_-_131357036.23-ENST00000259216.4	CFC1	CCACCTTGTTGGTCAGCCAGGAGAAACGGGAGTTTAAGAGCTAAGCTG	GTCAGCCAGGAGAAACGGGA
CFC1_-_131357074.23-ENST00000259216.4	CFC1	CCACCTTGTTGGGTCCCTGAGCTAGGGTCGGGTTTAAGAGCTAAGCTG	GGTCCCTGAGCTAGGGTCGG
CFC1_+_131357115.23-ENST00000259216.4	CFC1	CCACCTTGTTGGCCCAGCCAGGTCTCATAGAGTTTAAGAGCTAAGCTG	GCCCAGCCAGGTCTCATAGA
CFC1_-_131357071.23-ENST00000259216.4	CFC1	CCACCTTGTTGGGCAGTCCCTGAGCTAGGGTGTTTAAGAGCTAAGCTG	GGCAGTCCCTGAGCTAGGGT
CFC1_+_131357055.23-ENST00000259216.4	CFC1	CCACCTTGTTGGCGCCCCCGACCCTAGCTCAGTTTAAGAGCTAAGCTG	GCGCCCCCGACCCTAGCTCA
CFI_-_110723143.23-P1P2	CFI	CCACCTTGTTGGTTCATGTTGGAGGTGTTCGGTTTAAGAGCTAAGCTG	GTTCATGTTGGAGGTGTTCG
CFI_-_110723131.23-P1P2	CFI	CCACCTTGTTGGACATGAAGAAGCTTCATGTGTTTAAGAGCTAAGCTG	GACATGAAGAAGCTTCATGT
CFI_-_110722712.23-P1P2	CFI	CCACCTTGTTGGAACTATAGAGCGTactaagGTTTAAGAGCTAAGCTG	GAACTATAGAGCGTactaag
CFI_-_110722947.23-P1P2	CFI	CCACCTTGTTGGTTTGTTGCTGACTATAGAGGTTTAAGAGCTAAGCTG	GTTTGTTGCTGACTATAGAG
CFI_+_110723170.23-P1P2	CFI	CCACCTTGTTGGTTCAAAAGAATACCTGGAGGTTTAAGAGCTAAGCTG	GTTCAAAAGAATACCTGGAG
CHAD_+_48546256.23-P1P2	CHAD	CCACCTTGTTGGGGCCACCGTATAAAGAGGGGTTTAAGAGCTAAGCTG	GGGCCACCGTATAAAGAGGG
CHAD_-_48545793.23-P1P2	CHAD	CCACCTTGTTGGCTTGTTGTGGTCCAGGTAGGTTTAAGAGCTAAGCTG	GCTTGTTGTGGTCCAGGTAG
CHAD_-_48545797.23-P1P2	CHAD	CCACCTTGTTGGTTGTGGTCCAGGTAGAGGTGTTTAAGAGCTAAGCTG	GTTGTGGTCCAGGTAGAGGT
CHAD_-_48545759.23-P1P2	CHAD	CCACCTTGTTGGGCGGGGAGAGCAACCCCCGGTTTAAGAGCTAAGCTG	GGCGGGGAGAGCAACCCCCG
CHAD_-_48545811.23-P1P2	CHAD	CCACCTTGTTGGGAGGTAGGTCAGCTCGGTCGTTTAAGAGCTAAGCTG	GGAGGTAGGTCAGCTCGGTC
CHADL_+_41636876.23-P1P2	CHADL	CCACCTTGTTGGAGTTCCAGGCGGCATGGAGGTTTAAGAGCTAAGCTG	GAGTTCCAGGCGGCATGGAG
CHADL_+_41636468.23-P1P2	CHADL	CCACCTTGTTGGAGTCCAGTGAGCAGCGAGGGTTTAAGAGCTAAGCTG	GAGTCCAGTGAGCAGCGAGG
CHADL_+_41636409.23-P1P2	CHADL	CCACCTTGTTGGGAGAGGCCATGCCTGACACGTTTAAGAGCTAAGCTG	GGAGAGGCCATGCCTGACAC
CHADL_+_41636530.23-P1P2	CHADL	CCACCTTGTTGGGCCACCAACTCCAACGCAGGTTTAAGAGCTAAGCTG	GGCCACCAACTCCAACGCAG
CHADL_+_41636846.23-P1P2	CHADL	CCACCTTGTTGGTGGGCCCGATGGTGCAAGGGTTTAAGAGCTAAGCTG	GTGGGCCCGATGGTGCAAGG
CHI3L1_+_203155630.23-P1P2	CHI3L1	CCACCTTGTTGGCTGCTGGGTGAGGGACTAAGTTTAAGAGCTAAGCTG	GCTGCTGGGTGAGGGACTAA
CHI3L1_+_203155817.23-P1P2	CHI3L1	CCACCTTGTTGGTGGGGAAGAGGCCCTGTCTGTTTAAGAGCTAAGCTG	GTGGGGAAGAGGCCCTGTCT
CHI3L1_+_203155795.23-P1P2	CHI3L1	CCACCTTGTTGGTAGCTGGCACCAGGAGCCGGTTTAAGAGCTAAGCTG	GTAGCTGGCACCAGGAGCCG
CHI3L1_-_203155827.23-P1P2	CHI3L1	CCACCTTGTTGGGGTGCCAGCTACCTAGACAGTTTAAGAGCTAAGCTG	GGGTGCCAGCTACCTAGACA
CHI3L1_+_203155788.23-P1P2	CHI3L1	CCACCTTGTTGGCACCAGGAGCCGTGGGCAAGTTTAAGAGCTAAGCTG	GCACCAGGAGCCGTGGGCAA
CHL1_-_238506.23-P1P2	CHL1	CCACCTTGTTGGGGCAGGAGGGCGTAGACCCGTTTAAGAGCTAAGCTG	GGGCAGGAGGGCGTAGACCC
CHL1_+_238528.23-P1P2	CHL1	CCACCTTGTTGGTGGCTCTCTGGCCGCGGGAGTTTAAGAGCTAAGCTG	GTGGCTCTCTGGCCGCGGGA
CHL1_+_238480.23-P1P2	CHL1	CCACCTTGTTGGGTCTACGCCCTCCTGCCGGGTTTAAGAGCTAAGCTG	GGTCTACGCCCTCCTGCCGG
CHL1_-_238926.23-P1P2	CHL1	CCACCTTGTTGGCCCTCAGCCTGCACCCGGGGTTTAAGAGCTAAGCTG	GCCCTCAGCCTGCACCCGGG
CHL1_-_238494.23-P1P2	CHL1	CCACCTTGTTGGGAGCCAGCCTCCGGCAGGAGTTTAAGAGCTAAGCTG	GGAGCCAGCCTCCGGCAGGA
CILP_+_65503764.23-P1P2	CILP	CCACCTTGTTGGAGGAGTCCTGCTCAAGACAGTTTAAGAGCTAAGCTG	GAGGAGTCCTGCTCAAGACA
CILP_+_65503376.23-P1P2	CILP	CCACCTTGTTGGGATGCTGAGAAACCTCTGTGTTTAAGAGCTAAGCTG	GGATGCTGAGAAACCTCTGT
CILP_+_65503399.23-P1P2	CILP	CCACCTTGTTGGGCATATGCTGAGGAAACGGGTTTAAGAGCTAAGCTG	GGCATATGCTGAGGAAACGG
CILP_-_65503326.23-P1P2	CILP	CCACCTTGTTGGCTGCTCCAGGGATGTCTGGGTTTAAGAGCTAAGCTG	GCTGCTCCAGGGATGTCTGG
CILP_-_65503726.23-P1P2	CILP	CCACCTTGTTGGGCAGTTGAGTCCAGCAGTGGTTTAAGAGCTAAGCTG	GGCAGTTGAGTCCAGCAGTG
CILP2_+_19649096.23-P1P2	CILP2	CCACCTTGTTGGGCGTGCTCGGGTCCAACTCGTTTAAGAGCTAAGCTG	GGCGTGCTCGGGTCCAACTC
CILP2_+_19649135.23-P1P2	CILP2	CCACCTTGTTGGGCCGGGGCAGAGCGTCCGAGTTTAAGAGCTAAGCTG	GGCCGGGGCAGAGCGTCCGA
CILP2_-_19649141.23-P1P2	CILP2	CCACCTTGTTGGCGGAGCCCGGACCCTCCCTGTTTAAGAGCTAAGCTG	GCGGAGCCCGGACCCTCCCT
CILP2_+_19649571.23-P1P2	CILP2	CCACCTTGTTGGCATTGAGTGTTCCAGGGATGTTTAAGAGCTAAGCTG	GCATTGAGTGTTCCAGGGAT
CILP2_-_19649122.23-P1P2	CILP2	CCACCTTGTTGGGTTGGACCCGAGCACGCCGGTTTAAGAGCTAAGCTG	GGTTGGACCCGAGCACGCCG
CLCA1_+_86934172.23-P1P2	CLCA1	CCACCTTGTTGGTATATTCAGTTATCCCTCAGTTTAAGAGCTAAGCTG	GTATATTCAGTTATCCCTCA
CLCA1_+_86934885.23-P1P2	CLCA1	CCACCTTGTTGGgtgtcgtgcagctggaataGTTTAAGAGCTAAGCTG	Ggtgtcgtgcagctggaata
CLCA1_-_86934657.23-P1P2	CLCA1	CCACCTTGTTGGACAGGGAGATGTACAGCAAGTTTAAGAGCTAAGCTG	GACAGGGAGATGTACAGCAA
CLCA1_-_86934640.23-P1P2	CLCA1	CCACCTTGTTGGTTCCAAAGAGAGAAATCACGTTTAAGAGCTAAGCTG	GTTCCAAAGAGAGAAATCAC
CLCA1_+_86934602.23-P1P2	CLCA1	CCACCTTGTTGGTGGAAAATGCGGGTTACGAGTTTAAGAGCTAAGCTG	GTGGAAAATGCGGGTTACGA
CLCA2_-_86889917.23-P1P2	CLCA2	CCACCTTGTTGGCTCAGTGTGAGTGAACTGGGTTTAAGAGCTAAGCTG	GCTCAGTGTGAGTGAACTGG
CLCA2_+_86889873.23-P1P2	CLCA2	CCACCTTGTTGGCTGCTGCATACATTGTGTCGTTTAAGAGCTAAGCTG	GCTGCTGCATACATTGTGTC
CLCA2_-_86889941.23-P1P2	CLCA2	CCACCTTGTTGGTCTCTACAACATGACCCAAGTTTAAGAGCTAAGCTG	GTCTCTACAACATGACCCAA
CLCA2_+_86890074.23-P1P2	CLCA2	CCACCTTGTTGGTCTGATTCTCAGGTACCTGGTTTAAGAGCTAAGCTG	GTCTGATTCTCAGGTACCTG
CLCA2_+_86890148.23-P1P2	CLCA2	CCACCTTGTTGGGCTACAGGTCTGATCAAATGTTTAAGAGCTAAGCTG	GGCTACAGGTCTGATCAAAT
CLCA4_-_87012807.23-P1P2	CLCA4	CCACCTTGTTGGTAACTAGAGAGGAACAATGGTTTAAGAGCTAAGCTG	GTAACTAGAGAGGAACAATG
CLCA4_-_87012797.23-P1P2	CLCA4	CCACCTTGTTGGGAGCCAGGAATAACTAGAGGTTTAAGAGCTAAGCTG	GGAGCCAGGAATAACTAGAG
CLCA4_-_87012818.23-P1P2	CLCA4	CCACCTTGTTGGGAACAATGGGGTTATTCAGGTTTAAGAGCTAAGCTG	GGAACAATGGGGTTATTCAG
CLCA4_+_87013306.23-P1P2	CLCA4	CCACCTTGTTGGattagaggctgcaaaggatGTTTAAGAGCTAAGCTG	Gattagaggctgcaaaggat
CLCA4_+_87012779.23-P1P2	CLCA4	CCACCTTGTTGGGTTCCTCTCTAGTTATTCCGTTTAAGAGCTAAGCTG	GGTTCCTCTCTAGTTATTCC
CLCC1_+_109506058.23-P1P2	CLCC1	CCACCTTGTTGGAGCACGCTGAAACCCTGGGGTTTAAGAGCTAAGCTG	GAGCACGCTGAAACCCTGGG
CLCC1_+_109506061.23-P1P2	CLCC1	CCACCTTGTTGGGGAAGCACGCTGAAACCCTGTTTAAGAGCTAAGCTG	GGGAAGCACGCTGAAACCCT
CLCC1_-_109506042.23-P1P2	CLCC1	CCACCTTGTTGGCCCAGGCCGGCCGCAGAAGGTTTAAGAGCTAAGCTG	GCCCAGGCCGGCCGCAGAAG
CLCC1_+_109505703.23-P1P2	CLCC1	CCACCTTGTTGGTACGGAGAAGGCACAGCGAGTTTAAGAGCTAAGCTG	GTACGGAGAAGGCACAGCGA
CLCC1_+_109506031.23-P1P2	CLCC1	CCACCTTGTTGGAGCTGTGCGACCTCTTCTGGTTTAAGAGCTAAGCTG	GAGCTGTGCGACCTCTTCTG
CLEC14A_+_38725255.23-P1P2	CLEC14A	CCACCTTGTTGGAGCGGGACAGATCCAAGTTGTTTAAGAGCTAAGCTG	GAGCGGGACAGATCCAAGTT
CLEC14A_-_38725235.23-P1P2	CLEC14A	CCACCTTGTTGGACGCCGGCCTCATTCTCTGGTTTAAGAGCTAAGCTG	GACGCCGGCCTCATTCTCTG
CLEC14A_-_38724902.23-P1P2	CLEC14A	CCACCTTGTTGGGCCAGGAGAAACCCCGCAAGTTTAAGAGCTAAGCTG	GGCCAGGAGAAACCCCGCAA
CLEC14A_-_38725200.23-P1P2	CLEC14A	CCACCTTGTTGGgggccAGAGCGCCTGCCAGGTTTAAGAGCTAAGCTG	GgggccAGAGCGCCTGCCAG
CLEC14A_-_38724827.23-P1P2	CLEC14A	CCACCTTGTTGGGCGCGGTGCAGGAGCGTTGGTTTAAGAGCTAAGCTG	GGCGCGGTGCAGGAGCGTTG
CLSTN2_+_139654418.23-P1P2	CLSTN2	CCACCTTGTTGGAGCTGCGGCAAGGGAGGGTGTTTAAGAGCTAAGCTG	GAGCTGCGGCAAGGGAGGGT
CLSTN2_+_139654432.23-P1P2	CLSTN2	CCACCTTGTTGGACAGAGGCCAAAGAAGCTGGTTTAAGAGCTAAGCTG	GACAGAGGCCAAAGAAGCTG
CLSTN2_-_139654065.23-P1P2	CLSTN2	CCACCTTGTTGGCGGCGAGCTAGCGGCGCAGGTTTAAGAGCTAAGCTG	GCGGCGAGCTAGCGGCGCAG
CLSTN2_-_139654057.23-P1P2	CLSTN2	CCACCTTGTTGGGCTGCTGCCGGCGAGCTAGGTTTAAGAGCTAAGCTG	GGCTGCTGCCGGCGAGCTAG
CLSTN2_+_139654457.23-P1P2	CLSTN2	CCACCTTGTTGGAACTGACTTCGGGAATCCAGTTTAAGAGCTAAGCTG	GAACTGACTTCGGGAATCCA
CLSTN3_+_7283033.23-P1	CLSTN3	CCACCTTGTTGGTGAGGCGGTGGACTTGCAGGTTTAAGAGCTAAGCTG	GTGAGGCGGTGGACTTGCAG
CLSTN3_+_7283059.23-P1	CLSTN3	CCACCTTGTTGGCCTGGGCAGATCCCAATCTGTTTAAGAGCTAAGCTG	GCCTGGGCAGATCCCAATCT
CLSTN3_+_7283439.23-P1	CLSTN3	CCACCTTGTTGGAGCAGGTCTGAGAACGGATGTTTAAGAGCTAAGCTG	GAGCAGGTCTGAGAACGGAT
CLSTN3_+_7283401.23-P1	CLSTN3	CCACCTTGTTGGAGAGGGCCAGACACCTGTCGTTTAAGAGCTAAGCTG	GAGAGGGCCAGACACCTGTC
CLSTN3_-_7283029.23-P1	CLSTN3	CCACCTTGTTGGACGCTGGGCTGGGGGAAACGTTTAAGAGCTAAGCTG	GACGCTGGGCTGGGGGAAAC
CLSTN3_-_7308498.23-P2	CLSTN3	CCACCTTGTTGGTAGTTGGCCCTGGAGTGCGGTTTAAGAGCTAAGCTG	GTAGTTGGCCCTGGAGTGCG
CLSTN3_+_7308484.23-P2	CLSTN3	CCACCTTGTTGGTCAGCTGCCACGCACTCCAGTTTAAGAGCTAAGCTG	GTCAGCTGCCACGCACTCCA
CLSTN3_-_7308549.23-P2	CLSTN3	CCACCTTGTTGGGGGCGCTGCAGCAGGGTGTGTTTAAGAGCTAAGCTG	GGGGCGCTGCAGCAGGGTGT
CLSTN3_-_7308543.23-P2	CLSTN3	CCACCTTGTTGGGGAGAGGGGCGCTGCAGCAGTTTAAGAGCTAAGCTG	GGGAGAGGGGCGCTGCAGCA
CLSTN3_+_7308883.23-P2	CLSTN3	CCACCTTGTTGGAGGAAAGCCCGCAGCCCCAGTTTAAGAGCTAAGCTG	GAGGAAAGCCCGCAGCCCCA
CNTFR_+_34589296.23-P1P2	CNTFR	CCACCTTGTTGGCCGACTGTGGACTAGAGGGGTTTAAGAGCTAAGCTG	GCCGACTGTGGACTAGAGGG
CNTFR_-_34590105.23-P1P2	CNTFR	CCACCTTGTTGGCTCGGGCGCGCCCTCAAGAGTTTAAGAGCTAAGCTG	GCTCGGGCGCGCCCTCAAGA
CNTFR_-_34589256.23-P1P2	CNTFR	CCACCTTGTTGGCCCCGCGCGTGCAGCTGAGGTTTAAGAGCTAAGCTG	GCCCCGCGCGTGCAGCTGAG
CNTFR_+_34589299.23-P1P2	CNTFR	CCACCTTGTTGGGGGCCGACTGTGGACTAGAGTTTAAGAGCTAAGCTG	GGGGCCGACTGTGGACTAGA
CNTFR_-_34589259.23-P1P2	CNTFR	CCACCTTGTTGGCGCGCGTGCAGCTGAGGGGGTTTAAGAGCTAAGCTG	GCGCGCGTGCAGCTGAGGGG
CNTN1_-_41086269.23-P1P2	CNTN1	CCACCTTGTTGGGCTGTCAAGTAGCCAGGGTGTTTAAGAGCTAAGCTG	GGCTGTCAAGTAGCCAGGGT
CNTN1_+_41086628.23-P1P2	CNTN1	CCACCTTGTTGGAGCTCGGAGCCCTCTTCTAGTTTAAGAGCTAAGCTG	GAGCTCGGAGCCCTCTTCTA
CNTN1_-_41086640.23-P1P2	CNTN1	CCACCTTGTTGGACGGCAGTGCCCTAGAAGAGTTTAAGAGCTAAGCTG	GACGGCAGTGCCCTAGAAGA
CNTN1_+_41086293.23-P1P2	CNTN1	CCACCTTGTTGGTGGGAGCGCATCTCCCCACGTTTAAGAGCTAAGCTG	GTGGGAGCGCATCTCCCCAC
CNTN1_-_41086280.23-P1P2	CNTN1	CCACCTTGTTGGGCCAGGGTGGGCTCCGCCGGTTTAAGAGCTAAGCTG	GGCCAGGGTGGGCTCCGCCG
CNTN2_-_205012401.23-P1P2	CNTN2	CCACCTTGTTGGgccgcACCCGGACAGCGAGGTTTAAGAGCTAAGCTG	GgccgcACCCGGACAGCGAG
CNTN2_+_205012779.23-P1P2	CNTN2	CCACCTTGTTGGATTCCTGGACACACTCCTGGTTTAAGAGCTAAGCTG	GATTCCTGGACACACTCCTG
CNTN2_-_205012424.23-P1P2	CNTN2	CCACCTTGTTGGTGAGGCCGCCAGGGCCCAAGTTTAAGAGCTAAGCTG	GTGAGGCCGCCAGGGCCCAA
CNTN2_+_205012716.23-P1P2	CNTN2	CCACCTTGTTGGGATGCCGCCCACGTAGACAGTTTAAGAGCTAAGCTG	GGATGCCGCCCACGTAGACA
CNTN2_-_205012745.23-P1P2	CNTN2	CCACCTTGTTGGACGTGGGCGGCATCCCGCAGTTTAAGAGCTAAGCTG	GACGTGGGCGGCATCCCGCA
CNTN3_+_74570207.23-ENST00000263665.6	CNTN3	CCACCTTGTTGGCATTCATTGGCTGCTTAGGGTTTAAGAGCTAAGCTG	GCATTCATTGGCTGCTTAGG
CNTN3_-_74570236.23-ENST00000263665.6	CNTN3	CCACCTTGTTGGGCAGCCAATGAATGAAAGCGTTTAAGAGCTAAGCTG	GGCAGCCAATGAATGAAAGC
CNTN3_-_74570195.23-ENST00000263665.6	CNTN3	CCACCTTGTTGGACCTCAACTTAGAAAATATGTTTAAGAGCTAAGCTG	GACCTCAACTTAGAAAATAT
CNTN3_-_74570036.23-ENST00000263665.6	CNTN3	CCACCTTGTTGGGGCTTACAAAAATAAGGGAGTTTAAGAGCTAAGCTG	GGGCTTACAAAAATAAGGGA
CNTN3_-_74570253.23-ENST00000263665.6	CNTN3	CCACCTTGTTGGGCAGGATCAACTGTTTCCAGTTTAAGAGCTAAGCTG	GGCAGGATCAACTGTTTCCA
CNTN4_+_2140620.23-P1P2	CNTN4	CCACCTTGTTGGCTGGCGAGAGCCTCGGGTGGTTTAAGAGCTAAGCTG	GCTGGCGAGAGCCTCGGGTG
CNTN4_-_2140671.23-P1P2	CNTN4	CCACCTTGTTGGCCCGGTGCTGAGGTAAGTGGTTTAAGAGCTAAGCTG	GCCCGGTGCTGAGGTAAGTG
CNTN4_+_2141044.23-P1P2	CNTN4	CCACCTTGTTGGAGTAGCCCGAACCAGTCGGGTTTAAGAGCTAAGCTG	GAGTAGCCCGAACCAGTCGG
CNTN4_+_2140600.23-P1P2	CNTN4	CCACCTTGTTGGGGCGCCGGCACAGTCCGAGGTTTAAGAGCTAAGCTG	GGGCGCCGGCACAGTCCGAG
CNTN4_-_2140674.23-P1P2	CNTN4	CCACCTTGTTGGGGTGCTGAGGTAAGTGAGGGTTTAAGAGCTAAGCTG	GGGTGCTGAGGTAAGTGAGG
CNTN5_-_98891757.23-P1P2	CNTN5	CCACCTTGTTGGGAGCGGAACTGCGAGAAGGGTTTAAGAGCTAAGCTG	GGAGCGGAACTGCGAGAAGG
CNTN5_-_98891754.23-P1P2	CNTN5	CCACCTTGTTGGGGGGAGCGGAACTGCGAGAGTTTAAGAGCTAAGCTG	GGGGGAGCGGAACTGCGAGA
CNTN5_-_98891787.23-P1P2	CNTN5	CCACCTTGTTGGGTGCCATTAAAGCTCGGGGGTTTAAGAGCTAAGCTG	GGTGCCATTAAAGCTCGGGG
CNTN5_+_98891801.23-P1P2	CNTN5	CCACCTTGTTGGCTCGCAGCAGACGGGACCCGTTTAAGAGCTAAGCTG	GCTCGCAGCAGACGGGACCC
CNTN5_-_98891792.23-P1P2	CNTN5	CCACCTTGTTGGATTAAAGCTCGGGGCGGAGGTTTAAGAGCTAAGCTG	GATTAAAGCTCGGGGCGGAG
CNTN6_+_1134522.23-P1P2	CNTN6	CCACCTTGTTGGCATGTGCAAAGCTCTCGTTGTTTAAGAGCTAAGCTG	GCATGTGCAAAGCTCTCGTT
CNTN6_+_1134364.23-P1P2	CNTN6	CCACCTTGTTGGTGGAGATAGTCACTCCTGTGTTTAAGAGCTAAGCTG	GTGGAGATAGTCACTCCTGT
CNTN6_+_1134705.23-P1P2	CNTN6	CCACCTTGTTGGCAGGCAGAACCAAGCCGTAGTTTAAGAGCTAAGCTG	GCAGGCAGAACCAAGCCGTA
CNTN6_-_1135047.23-P1P2	CNTN6	CCACCTTGTTGGGGAGGTTAGGATCAAACCAGTTTAAGAGCTAAGCTG	GGGAGGTTAGGATCAAACCA
CNTN6_-_1135120.23-P1P2	CNTN6	CCACCTTGTTGGTAAAACTAATGGGCAAGACGTTTAAGAGCTAAGCTG	GTAAAACTAATGGGCAAGAC
CNTNAP1_-_40834902.23-P1P2	CNTNAP1	CCACCTTGTTGGCCGCGGTCTCAGGAGCCGAGTTTAAGAGCTAAGCTG	GCCGCGGTCTCAGGAGCCGA
CNTNAP1_-_40834933.23-P1P2	CNTNAP1	CCACCTTGTTGGCTGTGAGTGTTGGGCTTGGGTTTAAGAGCTAAGCTG	GCTGTGAGTGTTGGGCTTGG
CNTNAP1_-_40834555.23-P1P2	CNTNAP1	CCACCTTGTTGGTGCGCGGGGTCCGGGAAACGTTTAAGAGCTAAGCTG	GTGCGCGGGGTCCGGGAAAC
CNTNAP1_-_40834821.23-P1P2	CNTNAP1	CCACCTTGTTGGGCCGGAGCCGTTCACAGGGGTTTAAGAGCTAAGCTG	GGCCGGAGCCGTTCACAGGG
CNTNAP1_+_40834807.23-P1P2	CNTNAP1	CCACCTTGTTGGGCAGCCGCCTCCCTGTGAAGTTTAAGAGCTAAGCTG	GGCAGCCGCCTCCCTGTGAA
CNTNAP2_-_145813908.23-P1P2	CNTNAP2	CCACCTTGTTGGTCTCCCTTCAAGAACCCTAGTTTAAGAGCTAAGCTG	GTCTCCCTTCAAGAACCCTA
CNTNAP2_+_145813901.23-P1P2	CNTNAP2	CCACCTTGTTGGTGCAGTCCGACTCTCCGTAGTTTAAGAGCTAAGCTG	GTGCAGTCCGACTCTCCGTA
CNTNAP2_-_145813916.23-P1P2	CNTNAP2	CCACCTTGTTGGCAAGAACCCTACGGAGAGTGTTTAAGAGCTAAGCTG	GCAAGAACCCTACGGAGAGT
CNTNAP2_+_145813950.23-P1P2	CNTNAP2	CCACCTTGTTGGGCATCCTTCGCCTCCCGGCGTTTAAGAGCTAAGCTG	GGCATCCTTCGCCTCCCGGC
CNTNAP2_-_145813942.23-P1P2	CNTNAP2	CCACCTTGTTGGCATCTCCGCAGCGAGCTCTGTTTAAGAGCTAAGCTG	GCATCTCCGCAGCGAGCTCT
CNTNAP4_-_76311253.23-P1P2	CNTNAP4	CCACCTTGTTGGGACCGCTGCTGCGAGGAGTGTTTAAGAGCTAAGCTG	GGACCGCTGCTGCGAGGAGT
CNTNAP4_-_76311426.23-P1P2	CNTNAP4	CCACCTTGTTGGgaaaagacggagggaggtgGTTTAAGAGCTAAGCTG	Ggaaaagacggagggaggtg
CNTNAP4_+_76311784.23-P1P2	CNTNAP4	CCACCTTGTTGGAAGTGTTAACCGGTCACATGTTTAAGAGCTAAGCTG	GAAGTGTTAACCGGTCACAT
CNTNAP4_+_76311521.23-P1P2	CNTNAP4	CCACCTTGTTGGTCCCCCAAAAGATCTTGAGGTTTAAGAGCTAAGCTG	GTCCCCCAAAAGATCTTGAG
CNTNAP4_-_76311681.23-P1P2	CNTNAP4	CCACCTTGTTGGTGATTTAAAACTTGCTGGGGTTTAAGAGCTAAGCTG	GTGATTTAAAACTTGCTGGG
CNTNAP5_+_124782902.23-P1P2	CNTNAP5	CCACCTTGTTGGGACAGGCGCCGGAGCTCGGGTTTAAGAGCTAAGCTG	GGACAGGCGCCGGAGCTCGG
CNTNAP5_-_124782891.23-P1P2	CNTNAP5	CCACCTTGTTGGGCTCTCGCGCCCGACGAGGGTTTAAGAGCTAAGCTG	GGCTCTCGCGCCCGACGAGG
CNTNAP5_-_124782897.23-P1P2	CNTNAP5	CCACCTTGTTGGGCGCCCGACGAGGTGGATTGTTTAAGAGCTAAGCTG	GGCGCCCGACGAGGTGGATT
CNTNAP5_-_124782935.23-P1P2	CNTNAP5	CCACCTTGTTGGGGCGCCTGTCGTTCTAATTGTTTAAGAGCTAAGCTG	GGGCGCCTGTCGTTCTAATT
CNTNAP5_+_124782850.23-P1P2	CNTNAP5	CCACCTTGTTGGGCTGGAATCAGCACCCGGGGTTTAAGAGCTAAGCTG	GGCTGGAATCAGCACCCGGG
COCH_-_31343802.23-P1P2	COCH	CCACCTTGTTGGGGTGGATCTCGAGCAGGTGGTTTAAGAGCTAAGCTG	GGGTGGATCTCGAGCAGGTG
COCH_+_31343762.23-P1P2	COCH	CCACCTTGTTGGACCCGGCTGCGCCCGAGTGGTTTAAGAGCTAAGCTG	GACCCGGCTGCGCCCGAGTG
COCH_-_31343772.23-P1P2	COCH	CCACCTTGTTGGGGCCTTGCCTTCCGCACTCGTTTAAGAGCTAAGCTG	GGGCCTTGCCTTCCGCACTC
COCH_-_31343980.23-P1P2	COCH	CCACCTTGTTGGGCGCCTCCCAGACCTAGAGGTTTAAGAGCTAAGCTG	GGCGCCTCCCAGACCTAGAG
COCH_+_31344154.23-P1P2	COCH	CCACCTTGTTGGAGGCCGAGAGCCGGGATCCGTTTAAGAGCTAAGCTG	GAGGCCGAGAGCCGGGATCC
COL10A1_+_116447272.23-P1P2	COL10A1	CCACCTTGTTGGCCTTCTGCACTGCTCATCTGTTTAAGAGCTAAGCTG	GCCTTCTGCACTGCTCATCT
COL10A1_+_116447296.23-P1P2	COL10A1	CCACCTTGTTGGCCACTGAACAGCTCTTGAGGTTTAAGAGCTAAGCTG	GCCACTGAACAGCTCTTGAG
COL10A1_-_116447249.23-P1P2	COL10A1	CCACCTTGTTGGGTTCCTGGAGATGGTGCCTGTTTAAGAGCTAAGCTG	GGTTCCTGGAGATGGTGCCT
COL10A1_+_116447231.23-P1P2	COL10A1	CCACCTTGTTGGCTGCCAAGGCACCATCTCCGTTTAAGAGCTAAGCTG	GCTGCCAAGGCACCATCTCC
COL10A1_+_116447244.23-P1P2	COL10A1	CCACCTTGTTGGAAGCTTCAGAAAGCTGCCAGTTTAAGAGCTAAGCTG	GAAGCTTCAGAAAGCTGCCA
COL11A1_-_103573592.23-P1P2	COL11A1	CCACCTTGTTGGGCAGAAGCAGTAGGACCGAGTTTAAGAGCTAAGCTG	GGCAGAAGCAGTAGGACCGA
COL11A1_+_103573630.23-P1P2	COL11A1	CCACCTTGTTGGTCCAAGCTAGAGAGGTCAGGTTTAAGAGCTAAGCTG	GTCCAAGCTAGAGAGGTCAG
COL11A1_+_103573969.23-P1P2	COL11A1	CCACCTTGTTGGCCGGCAGAGGAAGGATCAGGTTTAAGAGCTAAGCTG	GCCGGCAGAGGAAGGATCAG
COL11A1_-_103574062.23-P1P2	COL11A1	CCACCTTGTTGGGAGTACTGTGTGCCCCTAAGTTTAAGAGCTAAGCTG	GGAGTACTGTGTGCCCCTAA
COL11A1_+_103574053.23-P1P2	COL11A1	CCACCTTGTTGGGACGGCATGAAGCCTTTAGGTTTAAGAGCTAAGCTG	GGACGGCATGAAGCCTTTAG
COL11A2_+_33160216.23-P1P2	COL11A2	CCACCTTGTTGGAAGCGGCAGCCACCGAGGAGTTTAAGAGCTAAGCTG	GAAGCGGCAGCCACCGAGGA
COL11A2_+_33160232.23-P1P2	COL11A2	CCACCTTGTTGGGGCCGGGGACACACAGAAGGTTTAAGAGCTAAGCTG	GGGCCGGGGACACACAGAAG
COL11A2_-_33160201.23-P1P2	COL11A2	CCACCTTGTTGGATGCAGCAAGGCGCCGTCGGTTTAAGAGCTAAGCTG	GATGCAGCAAGGCGCCGTCG
COL11A2_-_33160190.23-P1P2	COL11A2	CCACCTTGTTGGGGCCCAGCTCCATGCAGCAGTTTAAGAGCTAAGCTG	GGGCCCAGCTCCATGCAGCA
COL11A2_-_33160098.23-P1P2	COL11A2	CCACCTTGTTGGCTGAGGCTGACAGAAGACAGTTTAAGAGCTAAGCTG	GCTGAGGCTGACAGAAGACA
COL12A1_+_75915572.23-P1P2	COL12A1	CCACCTTGTTGGGCCTATCGCCGGGGCGTGTGTTTAAGAGCTAAGCTG	GGCCTATCGCCGGGGCGTGT
COL12A1_-_75915702.23-P1P2	COL12A1	CCACCTTGTTGGGCGGGCGCGGCAGGAAGACGTTTAAGAGCTAAGCTG	GGCGGGCGCGGCAGGAAGAC
COL12A1_-_75915659.23-P1P2	COL12A1	CCACCTTGTTGGTGCGGGGAAGTCCAGGAGGGTTTAAGAGCTAAGCTG	GTGCGGGGAAGTCCAGGAGG
COL12A1_+_75915386.23-P1P2	COL12A1	CCACCTTGTTGGCGGAGCGGTGAAGAATCCTGTTTAAGAGCTAAGCTG	GCGGAGCGGTGAAGAATCCT
COL12A1_-_75915525.23-P1P2	COL12A1	CCACCTTGTTGGCAACAGGGAGAGGTAGCGGGTTTAAGAGCTAAGCTG	GCAACAGGGAGAGGTAGCGG
COL14A1_-_121137795.23-P1P2	COL14A1	CCACCTTGTTGGCACGGTGTAGGGAGATTAGGTTTAAGAGCTAAGCTG	GCACGGTGTAGGGAGATTAG
COL14A1_-_121137426.23-P1P2	COL14A1	CCACCTTGTTGGAGCGCAGCGGCagaaggagGTTTAAGAGCTAAGCTG	GAGCGCAGCGGCagaaggag
COL14A1_-_121137513.23-P1P2	COL14A1	CCACCTTGTTGGGCCGCCAAGGACCAACTAGGTTTAAGAGCTAAGCTG	GGCCGCCAAGGACCAACTAG
COL14A1_-_121137485.23-P1P2	COL14A1	CCACCTTGTTGGCTCCGAGGGAAGAGAGCAAGTTTAAGAGCTAAGCTG	GCTCCGAGGGAAGAGAGCAA
COL14A1_-_121137557.23-P1P2	COL14A1	CCACCTTGTTGGCGCGGAGAGCTCCCAACCTGTTTAAGAGCTAAGCTG	GCGCGGAGAGCTCCCAACCT
COL15A1_+_101706204.23-P1P2	COL15A1	CCACCTTGTTGGCAAAGGCGGCGCTCGGCAGGTTTAAGAGCTAAGCTG	GCAAAGGCGGCGCTCGGCAG
COL15A1_+_101706650.23-P1P2	COL15A1	CCACCTTGTTGGACCGCCAGTGCGCACTGAGGTTTAAGAGCTAAGCTG	GACCGCCAGTGCGCACTGAG
COL15A1_+_101706415.23-P1P2	COL15A1	CCACCTTGTTGGGATGTGCCCGAGGGAGAAAGTTTAAGAGCTAAGCTG	GGATGTGCCCGAGGGAGAAA
COL15A1_+_101706183.23-P1P2	COL15A1	CCACCTTGTTGGGCGGCGGCGGGCAGAATCCGTTTAAGAGCTAAGCTG	GGCGGCGGCGGGCAGAATCC
COL15A1_+_101706279.23-P1P2	COL15A1	CCACCTTGTTGGGCAGAGCGTTGGAGCTTAGGTTTAAGAGCTAAGCTG	GGCAGAGCGTTGGAGCTTAG
COL16A1_-_32169583.23-P1P2	COL16A1	CCACCTTGTTGGCCTGGCGCTCGAGCTCTCCGTTTAAGAGCTAAGCTG	GCCTGGCGCTCGAGCTCTCC
COL16A1_+_32169536.23-P1P2	COL16A1	CCACCTTGTTGGTGGGGACCCGTGACCGTCAGTTTAAGAGCTAAGCTG	GTGGGGACCCGTGACCGTCA
COL16A1_-_32169522.23-P1P2	COL16A1	CCACCTTGTTGGAGGTTCCTCAGGTCCGCTAGTTTAAGAGCTAAGCTG	GAGGTTCCTCAGGTCCGCTA
COL16A1_+_32169148.23-P1P2	COL16A1	CCACCTTGTTGGCAGAGACTAGGAGCCGGAAGTTTAAGAGCTAAGCTG	GCAGAGACTAGGAGCCGGAA
COL16A1_-_32169204.23-P1P2	COL16A1	CCACCTTGTTGGAGGCTCCAGCCAGAGTGCAGTTTAAGAGCTAAGCTG	GAGGCTCCAGCCAGAGTGCA
COL18A1_+_46875956.23-P1P2	COL18A1	CCACCTTGTTGGCGGAGAGCTAGGAATGCCAGTTTAAGAGCTAAGCTG	GCGGAGAGCTAGGAATGCCA
COL18A1_+_46875940.23-P1P2	COL18A1	CCACCTTGTTGGCCACGGCTGGGCCAGAGAGGTTTAAGAGCTAAGCTG	GCCACGGCTGGGCCAGAGAG
COL18A1_-_46875950.23-P1P2	COL18A1	CCACCTTGTTGGGGAGAATGGGACCACTCTCGTTTAAGAGCTAAGCTG	GGGAGAATGGGACCACTCTC
COL18A1_+_46875982.23-P1P2	COL18A1	CCACCTTGTTGGGTGCCAGCCTCGGTTGTGTGTTTAAGAGCTAAGCTG	GGTGCCAGCCTCGGTTGTGT
COL18A1_-_46875996.23-P1P2	COL18A1	CCACCTTGTTGGCCGGGCGCCCACACAACCGGTTTAAGAGCTAAGCTG	GCCGGGCGCCCACACAACCG
COL19A1_+_70576482.23-P1P2	COL19A1	CCACCTTGTTGGGCGCAGTGGAGTCCGGACAGTTTAAGAGCTAAGCTG	GGCGCAGTGGAGTCCGGACA
COL19A1_-_70576473.23-P1P2	COL19A1	CCACCTTGTTGGCAGGGAGCTCACTCCTCGGGTTTAAGAGCTAAGCTG	GCAGGGAGCTCACTCCTCGG
COL19A1_-_70576470.23-P1P2	COL19A1	CCACCTTGTTGGTCGCAGGGAGCTCACTCCTGTTTAAGAGCTAAGCTG	GTCGCAGGGAGCTCACTCCT
COL19A1_-_70576513.23-P1P2	COL19A1	CCACCTTGTTGGACTCCACTGCGCCTCTGAGGTTTAAGAGCTAAGCTG	GACTCCACTGCGCCTCTGAG
COL19A1_-_70576901.23-P1P2	COL19A1	CCACCTTGTTGGGAGCACTGCTGATGCGGGTGTTTAAGAGCTAAGCTG	GGAGCACTGCTGATGCGGGT
COL1A1_+_48278983.23-P1P2	COL1A1	CCACCTTGTTGGGCCAGTCGTCGGAGCAGACGTTTAAGAGCTAAGCTG	GGCCAGTCGTCGGAGCAGAC
COL1A1_+_48278955.23-P1P2	COL1A1	CCACCTTGTTGGTCCTCGGGGTCGGAGCAGGGTTTAAGAGCTAAGCTG	GTCCTCGGGGTCGGAGCAGG
COL1A1_+_48278601.23-P1P2	COL1A1	CCACCTTGTTGGACAGGAGGGAGCTCACCCTGTTTAAGAGCTAAGCTG	GACAGGAGGGAGCTCACCCT
COL1A1_+_48278925.23-P1P2	COL1A1	CCACCTTGTTGGGTGTGAGGCCACGCATGAGGTTTAAGAGCTAAGCTG	GGTGTGAGGCCACGCATGAG
COL1A1_+_48278939.23-P1P2	COL1A1	CCACCTTGTTGGAGGAGGCACGCGGAGTGTGGTTTAAGAGCTAAGCTG	GAGGAGGCACGCGGAGTGTG
COL1A2_+_94024270.23-P1P2	COL1A2	CCACCTTGTTGGCGGCGGAGGTATCACCTGGGTTTAAGAGCTAAGCTG	GCGGCGGAGGTATCACCTGG
COL1A2_+_94024273.23-P1P2	COL1A2	CCACCTTGTTGGCACCGGCGGAGGTATCACCGTTTAAGAGCTAAGCTG	GCACCGGCGGAGGTATCACC
COL1A2_-_94024303.23-P1P2	COL1A2	CCACCTTGTTGGACCTCCGCCGGTGACCCAGGTTTAAGAGCTAAGCTG	GACCTCCGCCGGTGACCCAG
COL1A2_+_94024289.23-P1P2	COL1A2	CCACCTTGTTGGCGCAGAGCCCCTGGGTCACGTTTAAGAGCTAAGCTG	GCGCAGAGCCCCTGGGTCAC
COL1A2_-_94024225.23-P1P2	COL1A2	CCACCTTGTTGGTTAGCACCACGGCAGCAGGGTTTAAGAGCTAAGCTG	GTTAGCACCACGGCAGCAGG
COL20A1_-_61924594.23-P1P2	COL20A1	CCACCTTGTTGGGAGTGGACCAGCACACCCCGTTTAAGAGCTAAGCTG	GGAGTGGACCAGCACACCCC
COL20A1_+_61925021.23-P1P2	COL20A1	CCACCTTGTTGGTGATCACAGAGGCACCAGTGTTTAAGAGCTAAGCTG	GTGATCACAGAGGCACCAGT
COL20A1_+_61925031.23-P1P2	COL20A1	CCACCTTGTTGGGCTCCCAAACTGATCACAGGTTTAAGAGCTAAGCTG	GGCTCCCAAACTGATCACAG
COL20A1_+_61924743.23-P1P2	COL20A1	CCACCTTGTTGGCCGGTCCTGTGGCTCACAGGTTTAAGAGCTAAGCTG	GCCGGTCCTGTGGCTCACAG
COL20A1_+_61924945.23-P1P2	COL20A1	CCACCTTGTTGGCTCAGTGGGACCCCTGCCAGTTTAAGAGCTAAGCTG	GCTCAGTGGGACCCCTGCCA
COL21A1_-_56112305.23-P1P2	COL21A1	CCACCTTGTTGGGACCTGCGCTGAAACGGATGTTTAAGAGCTAAGCTG	GGACCTGCGCTGAAACGGAT
COL21A1_+_56112316.23-P1P2	COL21A1	CCACCTTGTTGGTGCAGGGAGAACGGACTCCGTTTAAGAGCTAAGCTG	GTGCAGGGAGAACGGACTCC
COL21A1_-_56111933.23-P1P2	COL21A1	CCACCTTGTTGGTCAGAAGCCAAACACTCCAGTTTAAGAGCTAAGCTG	GTCAGAAGCCAAACACTCCA
COL21A1_+_56112313.23-P1P2	COL21A1	CCACCTTGTTGGAGGGAGAACGGACTCCGGGGTTTAAGAGCTAAGCTG	GAGGGAGAACGGACTCCGGG
COL21A1_+_56112178.23-P1P2	COL21A1	CCACCTTGTTGGCTGGACACTGCGCCAGGTAGTTTAAGAGCTAAGCTG	GCTGGACACTGCGCCAGGTA
COL22A1_-_139925882.23-P1P2	COL22A1	CCACCTTGTTGGCTGGCAGGGAGGCACTCAGGTTTAAGAGCTAAGCTG	GCTGGCAGGGAGGCACTCAG
COL22A1_-_139925864.23-P1P2	COL22A1	CCACCTTGTTGGAGAGAACCCGGGTCTTACCGTTTAAGAGCTAAGCTG	GAGAGAACCCGGGTCTTACC
COL22A1_+_139925850.23-P1P2	COL22A1	CCACCTTGTTGGCTCCCTGCCAGGTAAGACCGTTTAAGAGCTAAGCTG	GCTCCCTGCCAGGTAAGACC
COL22A1_-_139926208.23-P1P2	COL22A1	CCACCTTGTTGGCGGAGAAGACACTTCCTTGGTTTAAGAGCTAAGCTG	GCGGAGAAGACACTTCCTTG
COL22A1_-_139926053.23-P1P2	COL22A1	CCACCTTGTTGGAGACCCGCAGTAAGTGTGGGTTTAAGAGCTAAGCTG	GAGACCCGCAGTAAGTGTGG
COL24A1_+_86621991.23-P1P2	COL24A1	CCACCTTGTTGGCACCCGCCGGGTAGGGTAGGTTTAAGAGCTAAGCTG	GCACCCGCCGGGTAGGGTAG
COL24A1_-_86622456.23-P1P2	COL24A1	CCACCTTGTTGGGGCGACTCTGTGACTCCAGGTTTAAGAGCTAAGCTG	GGGCGACTCTGTGACTCCAG
COL24A1_+_86621997.23-P1P2	COL24A1	CCACCTTGTTGGGTAGCCCACCCGCCGGGTAGTTTAAGAGCTAAGCTG	GGTAGCCCACCCGCCGGGTA
COL24A1_-_86622009.23-P1P2	COL24A1	CCACCTTGTTGGTAACCCCTACCCTACCCGGGTTTAAGAGCTAAGCTG	GTAACCCCTACCCTACCCGG
COL24A1_-_86622366.23-P1P2	COL24A1	CCACCTTGTTGGGGAGGTAAACCTCACTGGGGTTTAAGAGCTAAGCTG	GGGAGGTAAACCTCACTGGG
COL26A1_+_101006159.23-P1P2	COL26A1	CCACCTTGTTGGGTGCGAGCTGGAAATGTGTGTTTAAGAGCTAAGCTG	GGTGCGAGCTGGAAATGTGT
COL26A1_+_101006231.23-P1P2	COL26A1	CCACCTTGTTGGGGCGCCCGGACCGAACCCGGTTTAAGAGCTAAGCTG	GGGCGCCCGGACCGAACCCG
COL26A1_+_101006468.23-P1P2	COL26A1	CCACCTTGTTGGTCGGCCCCGAGCTACTCACGTTTAAGAGCTAAGCTG	GTCGGCCCCGAGCTACTCAC
COL26A1_-_101006153.23-P1P2	COL26A1	CCACCTTGTTGGGGCGGCCCCGGAGAGGCGTGTTTAAGAGCTAAGCTG	GGGCGGCCCCGGAGAGGCGT
COL26A1_+_101006381.23-P1P2	COL26A1	CCACCTTGTTGGTGCGGCCGAGAAGGGATAGGTTTAAGAGCTAAGCTG	GTGCGGCCGAGAAGGGATAG
COL27A1_-_116918222.23-P1P2	COL27A1	CCACCTTGTTGGGGCTCGGGAGCATGAAGTAGTTTAAGAGCTAAGCTG	GGGCTCGGGAGCATGAAGTA
COL27A1_+_116917873.23-P1P2	COL27A1	CCACCTTGTTGGGCAGAGCAAGGCCGGGTGAGTTTAAGAGCTAAGCTG	GGCAGAGCAAGGCCGGGTGA
COL27A1_+_116918194.23-P1P2	COL27A1	CCACCTTGTTGGTCATGCTCCCGAGCCCGGGGTTTAAGAGCTAAGCTG	GTCATGCTCCCGAGCCCGGG
COL27A1_+_116917880.23-P1P2	COL27A1	CCACCTTGTTGGCCCGGAGGCAGAGCAAGGCGTTTAAGAGCTAAGCTG	GCCCGGAGGCAGAGCAAGGC
COL27A1_-_116918272.23-P1P2	COL27A1	CCACCTTGTTGGggggcccgaggcacagcggGTTTAAGAGCTAAGCTG	Gggggcccgaggcacagcgg
COL28A1_-_7575448.23-P1P2	COL28A1	CCACCTTGTTGGCAACAGCAAGGACTGTGGTGTTTAAGAGCTAAGCTG	GCAACAGCAAGGACTGTGGT
COL28A1_-_7575437.23-P1P2	COL28A1	CCACCTTGTTGGTGAGTAAATGCCAACAGCAGTTTAAGAGCTAAGCTG	GTGAGTAAATGCCAACAGCA
COL28A1_-_7575487.23-P1P2	COL28A1	CCACCTTGTTGGTGATATTGTTCTGTTCTGTGTTTAAGAGCTAAGCTG	GTGATATTGTTCTGTTCTGT
COL28A1_+_7575336.23-P1P2	COL28A1	CCACCTTGTTGGtagtcacttgaaatcagatGTTTAAGAGCTAAGCTG	Gtagtcacttgaaatcagat
COL28A1_+_7575379.23-P1P2	COL28A1	CCACCTTGTTGGCTGTTTGACAaactttataGTTTAAGAGCTAAGCTG	GCTGTTTGACAaactttata
COL2A1_-_48398051.23-P1P2	COL2A1	CCACCTTGTTGGCCCTGACACCGAAGGACAGGTTTAAGAGCTAAGCTG	GCCCTGACACCGAAGGACAG
COL2A1_+_48398243.23-P1P2	COL2A1	CCACCTTGTTGGGAAGACGCAGAGCGCTGCTGTTTAAGAGCTAAGCTG	GGAAGACGCAGAGCGCTGCT
COL2A1_-_48397828.23-P1P2	COL2A1	CCACCTTGTTGGGATGGGCACCGAGGACCCTGTTTAAGAGCTAAGCTG	GGATGGGCACCGAGGACCCT
COL2A1_-_48398156.23-P1P2	COL2A1	CCACCTTGTTGGCGGGCGGAGCGCAGCGAAAGTTTAAGAGCTAAGCTG	GCGGGCGGAGCGCAGCGAAA
COL2A1_-_48398202.23-P1P2	COL2A1	CCACCTTGTTGGCTCTACCGCGCCCTCATGCGTTTAAGAGCTAAGCTG	GCTCTACCGCGCCCTCATGC
COL3A1_-_189839131.23-P1P2	COL3A1	CCACCTTGTTGGTGACGGGCCCGGTGCTGAAGTTTAAGAGCTAAGCTG	GTGACGGGCCCGGTGCTGAA
COL3A1_-_189839149.23-P1P2	COL3A1	CCACCTTGTTGGAGGGCAGGGAACAACTTGAGTTTAAGAGCTAAGCTG	GAGGGCAGGGAACAACTTGA
COL3A1_-_189839099.23-P1P2	COL3A1	CCACCTTGTTGGCAAAGCAAAGGAATCTCAGGTTTAAGAGCTAAGCTG	GCAAAGCAAAGGAATCTCAG
COL3A1_-_189839302.23-P1P2	COL3A1	CCACCTTGTTGGGCACAACAGGAAGGTGAGTGTTTAAGAGCTAAGCTG	GGCACAACAGGAAGGTGAGT
COL3A1_-_189839088.23-P1P2	COL3A1	CCACCTTGTTGGCTATTTAAGGCCAAAGCAAGTTTAAGAGCTAAGCTG	GCTATTTAAGGCCAAAGCAA
COL4A1_-_110959448.23-P1P2	COL4A1	CCACCTTGTTGGCGGACAGCTAGCTCTCGGAGTTTAAGAGCTAAGCTG	GCGGACAGCTAGCTCTCGGA
COL4A1_-_110959497.23-P1P2	COL4A1	CCACCTTGTTGGCGGGTGCGGCGGCTCCAAGGTTTAAGAGCTAAGCTG	GCGGGTGCGGCGGCTCCAAG
COL4A1_+_110959470.23-P1P2	COL4A1	CCACCTTGTTGGGGAGCCGCCGCACCCGGGAGTTTAAGAGCTAAGCTG	GGGAGCCGCCGCACCCGGGA
COL4A1_+_110959449.23-P1P2	COL4A1	CCACCTTGTTGGGTGCGTAGCGCTGGAAGTCGTTTAAGAGCTAAGCTG	GGTGCGTAGCGCTGGAAGTC
COL4A1_+_110959051.23-P1P2	COL4A1	CCACCTTGTTGGGAGTTAAGGAATTCCTCCGGTTTAAGAGCTAAGCTG	GGAGTTAAGGAATTCCTCCG
COL4A2_+_110960090.23-P1P2	COL4A2	CCACCTTGTTGGGTGCGCGGCCCGCATGCAGGTTTAAGAGCTAAGCTG	GGTGCGCGGCCCGCATGCAG
COL4A2_-_110960046.23-P1P2	COL4A2	CCACCTTGTTGGCCCACAGGGGCCTAACGGGGTTTAAGAGCTAAGCTG	GCCCACAGGGGCCTAACGGG
COL4A2_-_110959637.23-P1P2	COL4A2	CCACCTTGTTGGAGCGCGCGGCCCGGGAGTGGTTTAAGAGCTAAGCTG	GAGCGCGCGGCCCGGGAGTG
COL4A2_-_110960033.23-P1P2	COL4A2	CCACCTTGTTGGCGGCCAAGGAGCACCCACAGTTTAAGAGCTAAGCTG	GCGGCCAAGGAGCACCCACA
COL4A2_+_110960059.23-P1P2	COL4A2	CCACCTTGTTGGGGCCGTCCCCCCCACGACCGTTTAAGAGCTAAGCTG	GGGCCGTCCCCCCCACGACC
COL4A3_-_228029385.23-P1P2	COL4A3	CCACCTTGTTGGCCGCGCTGCGCAGGAGACGGTTTAAGAGCTAAGCTG	GCCGCGCTGCGCAGGAGACG
COL4A3_+_228029436.23-P1P2	COL4A3	CCACCTTGTTGGCGGTCCGGGCGCTCATGGTGTTTAAGAGCTAAGCTG	GCGGTCCGGGCGCTCATGGT
COL4A3_-_228029808.23-P1P2	COL4A3	CCACCTTGTTGGGGCGGGGACAGGCCTCCAGGTTTAAGAGCTAAGCTG	GGGCGGGGACAGGCCTCCAG
COL4A3_+_228029406.23-P1P2	COL4A3	CCACCTTGTTGGCAGAGCCTGGGCGAGTCCGGTTTAAGAGCTAAGCTG	GCAGAGCCTGGGCGAGTCCG
COL4A3_-_228029690.23-P1P2	COL4A3	CCACCTTGTTGGTCCCGGGACAGGCAGCGAGGTTTAAGAGCTAAGCTG	GTCCCGGGACAGGCAGCGAG
COL4A4_+_228028701.23-P1P2	COL4A4	CCACCTTGTTGGGGTAAGGCGCCCATAGGTGGTTTAAGAGCTAAGCTG	GGGTAAGGCGCCCATAGGTG
COL4A4_+_228028914.23-P1P2	COL4A4	CCACCTTGTTGGGCGCCGGGCGTCTGCACTCGTTTAAGAGCTAAGCTG	GGCGCCGGGCGTCTGCACTC
COL4A4_-_228028908.23-P1P2	COL4A4	CCACCTTGTTGGCGCGGGCGCGGGGAACAAGGTTTAAGAGCTAAGCTG	GCGCGGGCGCGGGGAACAAG
COL4A4_-_228028713.23-P1P2	COL4A4	CCACCTTGTTGGCAGCGGTTGCCCCACCTATGTTTAAGAGCTAAGCTG	GCAGCGGTTGCCCCACCTAT
COL4A4_-_228028844.23-P1P2	COL4A4	CCACCTTGTTGGCTCTCGCAGCCAAGCCCGGGTTTAAGAGCTAAGCTG	GCTCTCGCAGCCAAGCCCGG
COL4A5_-_107683077.23-P1P2	COL4A5	CCACCTTGTTGGGGGAGGAAAGTAGATCTGTGTTTAAGAGCTAAGCTG	GGGGAGGAAAGTAGATCTGT
COL4A5_+_107683401.23-P1P2	COL4A5	CCACCTTGTTGGGGCTGCCCCCAAAGACTCAGTTTAAGAGCTAAGCTG	GGGCTGCCCCCAAAGACTCA
COL4A5_-_107683037.23-P1P2	COL4A5	CCACCTTGTTGGCTTGTGCTGGTGAGGAGGGGTTTAAGAGCTAAGCTG	GCTTGTGCTGGTGAGGAGGG
COL4A5_+_107683127.23-P1P2	COL4A5	CCACCTTGTTGGTCCCCAAAGCCGGTCTCTCGTTTAAGAGCTAAGCTG	GTCCCCAAAGCCGGTCTCTC
COL4A5_+_107683244.23-P1P2	COL4A5	CCACCTTGTTGGAGAGAGCTAGAGCCGGAGAGTTTAAGAGCTAAGCTG	GAGAGAGCTAGAGCCGGAGA
COL4A6_-_107681236.23-P1	COL4A6	CCACCTTGTTGGGCCACAACCTGAAATGGGAGTTTAAGAGCTAAGCTG	GGCCACAACCTGAAATGGGA
COL4A6_-_107681605.23-P1	COL4A6	CCACCTTGTTGGAGATAAGAAGTGCTCCAAAGTTTAAGAGCTAAGCTG	GAGATAAGAAGTGCTCCAAA
COL4A6_-_107681420.23-P1	COL4A6	CCACCTTGTTGGGGCAGCAACAGCTCACCCAGTTTAAGAGCTAAGCTG	GGGCAGCAACAGCTCACCCA
COL4A6_+_107681287.23-P1	COL4A6	CCACCTTGTTGGGCATCCAAAAGGGTTCGGGGTTTAAGAGCTAAGCTG	GGCATCCAAAAGGGTTCGGG
COL4A6_-_107681232.23-P1	COL4A6	CCACCTTGTTGGAGCAGCCACAACCTGAAATGTTTAAGAGCTAAGCTG	GAGCAGCCACAACCTGAAAT
COL4A6_-_107682430.23-P2	COL4A6	CCACCTTGTTGGTACATTAGCTCAATATAGGGTTTAAGAGCTAAGCTG	GTACATTAGCTCAATATAGG
COL4A6_-_107682241.23-P2	COL4A6	CCACCTTGTTGGTATATATCAGAATTATCAAGTTTAAGAGCTAAGCTG	GTATATATCAGAATTATCAA
COL4A6_-_107682443.23-P2	COL4A6	CCACCTTGTTGGTATAGGAGGCATTAATTATGTTTAAGAGCTAAGCTG	GTATAGGAGGCATTAATTAT
COL4A6_-_107682263.23-P2	COL4A6	CCACCTTGTTGGAACATTCAAGTCTTTATATGTTTAAGAGCTAAGCTG	GAACATTCAAGTCTTTATAT
COL4A6_+_107682492.23-P2	COL4A6	CCACCTTGTTGGGGTATTGGTAATTATTCTAGTTTAAGAGCTAAGCTG	GGGTATTGGTAATTATTCTA
COL5A1_+_137533700.23-P1P2	COL5A1	CCACCTTGTTGGCCCGCGACCCGCTCCCCGTGTTTAAGAGCTAAGCTG	GCCCGCGACCCGCTCCCCGT
COL5A1_-_137533695.23-P1P2	COL5A1	CCACCTTGTTGGGCGCAGGACCTCACTCGAGGTTTAAGAGCTAAGCTG	GGCGCAGGACCTCACTCGAG
COL5A1_+_137533682.23-P1P2	COL5A1	CCACCTTGTTGGTGGGCGCTCCGCTCGAGTGGTTTAAGAGCTAAGCTG	GTGGGCGCTCCGCTCGAGTG
COL5A1_+_137533665.23-P1P2	COL5A1	CCACCTTGTTGGTGAGGTCCTGCGCCAGCCGGTTTAAGAGCTAAGCTG	GTGAGGTCCTGCGCCAGCCG
COL5A1_+_137534123.23-P1P2	COL5A1	CCACCTTGTTGGTACCTGCGCGGCTCGGAGGGTTTAAGAGCTAAGCTG	GTACCTGCGCGGCTCGGAGG
COL5A2_+_190044035.23-P1P2	COL5A2	CCACCTTGTTGGGAGCTTCTAGATCCACCGTGTTTAAGAGCTAAGCTG	GGAGCTTCTAGATCCACCGT
COL5A2_-_190044041.23-P1P2	COL5A2	CCACCTTGTTGGAGTAGTGTACTCTCTCCAAGTTTAAGAGCTAAGCTG	GAGTAGTGTACTCTCTCCAA
COL5A2_-_190044044.23-P1P2	COL5A2	CCACCTTGTTGGAGTGTACTCTCTCCAACGGGTTTAAGAGCTAAGCTG	GAGTGTACTCTCTCCAACGG
COL5A2_+_190044311.23-P1P2	COL5A2	CCACCTTGTTGGGACATGATGGCAAACTGGGGTTTAAGAGCTAAGCTG	GGACATGATGGCAAACTGGG
COL5A2_+_190044455.23-P1P2	COL5A2	CCACCTTGTTGGCTGGAGCTGGTGCTGAAAAGTTTAAGAGCTAAGCTG	GCTGGAGCTGGTGCTGAAAA
COL5A3_+_10121152.23-P1P2	COL5A3	CCACCTTGTTGGCCGCGGACCCTGAGAGGAGGTTTAAGAGCTAAGCTG	GCCGCGGACCCTGAGAGGAG
COL5A3_-_10121128.23-P1P2	COL5A3	CCACCTTGTTGGCGGGGCGCGGCGACTTCTCGTTTAAGAGCTAAGCTG	GCGGGGCGCGGCGACTTCTC
COL5A3_+_10120924.23-P1P2	COL5A3	CCACCTTGTTGGCAGGGTCCACGACTCAGAGGTTTAAGAGCTAAGCTG	GCAGGGTCCACGACTCAGAG
COL5A3_-_10121151.23-P1P2	COL5A3	CCACCTTGTTGGTCGGTGCAGTCACTCGCGGGTTTAAGAGCTAAGCTG	GTCGGTGCAGTCACTCGCGG
COL5A3_+_10120949.23-P1P2	COL5A3	CCACCTTGTTGGGAGCCGGGAGGGAAGAGATGTTTAAGAGCTAAGCTG	GGAGCCGGGAGGGAAGAGAT
COL6A1_-_47402104.23-P1P2	COL6A1	CCACCTTGTTGGACCGCAGGCAGCTCGGGAGGTTTAAGAGCTAAGCTG	GACCGCAGGCAGCTCGGGAG
COL6A1_+_47401727.23-P1P2	COL6A1	CCACCTTGTTGGTCACCACACAGCGCGGCCAGTTTAAGAGCTAAGCTG	GTCACCACACAGCGCGGCCA
COL6A1_-_47402052.23-P1P2	COL6A1	CCACCTTGTTGGCCTTGGCCGGGGCCCCTAGGTTTAAGAGCTAAGCTG	GCCTTGGCCGGGGCCCCTAG
COL6A1_+_47401656.23-P1P2	COL6A1	CCACCTTGTTGGCAGCCAGAGTGAGAGCGGAGTTTAAGAGCTAAGCTG	GCAGCCAGAGTGAGAGCGGA
COL6A1_+_47401896.23-P1P2	COL6A1	CCACCTTGTTGGCCTGGCCGGCAGCAAAGAGGTTTAAGAGCTAAGCTG	GCCTGGCCGGCAGCAAAGAG
COL6A2_-_47518081.23-P1P2	COL6A2	CCACCTTGTTGGTCGGGAGCGGAGCCTCCTCGTTTAAGAGCTAAGCTG	GTCGGGAGCGGAGCCTCCTC
COL6A2_+_47518075.23-P1P2	COL6A2	CCACCTTGTTGGAGGCGCTCACCTGGTCCCGGTTTAAGAGCTAAGCTG	GAGGCGCTCACCTGGTCCCG
COL6A2_+_47518072.23-P1P2	COL6A2	CCACCTTGTTGGCGCTCACCTGGTCCCGAGGGTTTAAGAGCTAAGCTG	GCGCTCACCTGGTCCCGAGG
COL6A2_-_47518069.23-P1P2	COL6A2	CCACCTTGTTGGCGCCTCGGGCCGTCGGGAGGTTTAAGAGCTAAGCTG	GCGCCTCGGGCCGTCGGGAG
COL6A2_-_47518727.23-P1P2	COL6A2	CCACCTTGTTGGCGGAGGCGGCTCCCCAGGGGTTTAAGAGCTAAGCTG	GCGGAGGCGGCTCCCCAGGG
COL6A3_+_238322791.23-P1P2	COL6A3	CCACCTTGTTGGGAGCTCAGTCTTCCACCAAGTTTAAGAGCTAAGCTG	GGAGCTCAGTCTTCCACCAA
COL6A3_+_238322773.23-P1P2	COL6A3	CCACCTTGTTGGAAGGCCGTTCAGTTCTCCTGTTTAAGAGCTAAGCTG	GAAGGCCGTTCAGTTCTCCT
COL6A3_+_238322312.23-P1P2	COL6A3	CCACCTTGTTGGGCGCCCTGTGCATTCCGGGGTTTAAGAGCTAAGCTG	GGCGCCCTGTGCATTCCGGG
COL6A3_-_238322846.23-P1P2	COL6A3	CCACCTTGTTGGGGGCCAGGGATACCAGTCAGTTTAAGAGCTAAGCTG	GGGGCCAGGGATACCAGTCA
COL6A3_-_238322356.23-P1P2	COL6A3	CCACCTTGTTGGTGTAGCAGCCACAGACACGGTTTAAGAGCTAAGCTG	GTGTAGCAGCCACAGACACG
COL6A5_-_130064607.23-P1P2	COL6A5	CCACCTTGTTGGGGCTTAAAAGACCCTCTCAGTTTAAGAGCTAAGCTG	GGGCTTAAAAGACCCTCTCA
COL6A5_+_130064597.23-P1P2	COL6A5	CCACCTTGTTGGAACGCCTCGTGCCCTGAGAGTTTAAGAGCTAAGCTG	GAACGCCTCGTGCCCTGAGA
COL6A5_-_130064587.23-P1P2	COL6A5	CCACCTTGTTGGCAAGGGCACGGGTCAGCGCGTTTAAGAGCTAAGCTG	GCAAGGGCACGGGTCAGCGC
COL6A5_+_130064936.23-P1P2	COL6A5	CCACCTTGTTGGCCTTAGAGCTCAGATTTGGGTTTAAGAGCTAAGCTG	GCCTTAGAGCTCAGATTTGG
COL6A5_+_130064793.23-P1P2	COL6A5	CCACCTTGTTGGCCGGGGTCAGGGGACACTCGTTTAAGAGCTAAGCTG	GCCGGGGTCAGGGGACACTC
COL6A6_-_130300360.23-P1P2	COL6A6	CCACCTTGTTGGTGGTGTCTGAGTTAAATAAGTTTAAGAGCTAAGCTG	GTGGTGTCTGAGTTAAATAA
COL6A6_-_130300533.23-P1P2	COL6A6	CCACCTTGTTGGGTGCCATCAGCTCCCTCAAGTTTAAGAGCTAAGCTG	GGTGCCATCAGCTCCCTCAA
COL6A6_-_130300756.23-P1P2	COL6A6	CCACCTTGTTGGTGCTCGAGGAAAGGTAACAGTTTAAGAGCTAAGCTG	GTGCTCGAGGAAAGGTAACA
COL6A6_-_130300551.23-P1P2	COL6A6	CCACCTTGTTGGATGGAGTAAGCTGTGAGGTGTTTAAGAGCTAAGCTG	GATGGAGTAAGCTGTGAGGT
COL6A6_-_130300574.23-P1P2	COL6A6	CCACCTTGTTGGACAGAGACTCAGGTCAGTGGTTTAAGAGCTAAGCTG	GACAGAGACTCAGGTCAGTG
COL7A1_-_48632325.23-P1P2	COL7A1	CCACCTTGTTGGTGGGTAGGAACAGGATAGGGTTTAAGAGCTAAGCTG	GTGGGTAGGAACAGGATAGG
COL7A1_+_48632724.23-P1P2	COL7A1	CCACCTTGTTGGGCCCGAGAGACTGCAGCGGGTTTAAGAGCTAAGCTG	GGCCCGAGAGACTGCAGCGG
COL7A1_+_48632682.23-P1P2	COL7A1	CCACCTTGTTGGGCAGGCAAGACCAGGACTCGTTTAAGAGCTAAGCTG	GGCAGGCAAGACCAGGACTC
COL7A1_+_48632689.23-P1P2	COL7A1	CCACCTTGTTGGCGGACGCGCAGGCAAGACCGTTTAAGAGCTAAGCTG	GCGGACGCGCAGGCAAGACC
COL7A1_-_48632293.23-P1P2	COL7A1	CCACCTTGTTGGGGGACCCCGCACGCATCCAGTTTAAGAGCTAAGCTG	GGGGACCCCGCACGCATCCA
COL8A1_+_99357487.23-P1P2	COL8A1	CCACCTTGTTGGCCTTGAGCACGTAAGATCAGTTTAAGAGCTAAGCTG	GCCTTGAGCACGTAAGATCA
COL8A1_+_99357458.23-P1P2	COL8A1	CCACCTTGTTGGCTCGCTGGCTCCCACGGAGGTTTAAGAGCTAAGCTG	GCTCGCTGGCTCCCACGGAG
COL8A1_+_99357463.23-P1P2	COL8A1	CCACCTTGTTGGAGAGGCTCGCTGGCTCCCAGTTTAAGAGCTAAGCTG	GAGAGGCTCGCTGGCTCCCA
COL8A1_+_99357480.23-P1P2	COL8A1	CCACCTTGTTGGCACGTAAGATCAGGGAGAGGTTTAAGAGCTAAGCTG	GCACGTAAGATCAGGGAGAG
COL8A1_-_99357546.23-P1P2	COL8A1	CCACCTTGTTGGCAGGCAGCTCACCTACCAGGTTTAAGAGCTAAGCTG	GCAGGCAGCTCACCTACCAG
COL8A2_+_36590783.23-P1P2	COL8A2	CCACCTTGTTGGGGCGGCCGGCAGAGCGACGGTTTAAGAGCTAAGCTG	GGGCGGCCGGCAGAGCGACG
COL8A2_+_36590596.23-P1P2	COL8A2	CCACCTTGTTGGGGCTCCGAGGGCAAGACCTGTTTAAGAGCTAAGCTG	GGGCTCCGAGGGCAAGACCT
COL8A2_-_36590376.23-P1P2	COL8A2	CCACCTTGTTGGcccagagccacaTCGTCGGGTTTAAGAGCTAAGCTG	GcccagagccacaTCGTCGG
COL8A2_+_36590803.23-P1P2	COL8A2	CCACCTTGTTGGCCACTCCGGCAGCCGCGAGGTTTAAGAGCTAAGCTG	GCCACTCCGGCAGCCGCGAG
COL8A2_-_36590812.23-P1P2	COL8A2	CCACCTTGTTGGCTCTGCCGGCCGCCCCTCGGTTTAAGAGCTAAGCTG	GCTCTGCCGGCCGCCCCTCG
COL9A1_-_70992839.23-P1P2	COL9A1	CCACCTTGTTGGGACCCGCCACTAGCATAGGGTTTAAGAGCTAAGCTG	GGACCCGCCACTAGCATAGG
COL9A1_-_70992879.23-P1P2	COL9A1	CCACCTTGTTGGAAAGCACCCCCGGGAGTAGGTTTAAGAGCTAAGCTG	GAAAGCACCCCCGGGAGTAG
COL9A1_-_70992836.23-P1P2	COL9A1	CCACCTTGTTGGCCAGACCCGCCACTAGCATGTTTAAGAGCTAAGCTG	GCCAGACCCGCCACTAGCAT
COL9A1_+_70992802.23-P1P2	COL9A1	CCACCTTGTTGGCGGGTCTGGAAGCCTAGAGGTTTAAGAGCTAAGCTG	GCGGGTCTGGAAGCCTAGAG
COL9A1_+_70992865.23-P1P2	COL9A1	CCACCTTGTTGGTTGGCAACCGCTACTCCCGGTTTAAGAGCTAAGCTG	GTTGGCAACCGCTACTCCCG
COL9A2_-_40782889.23-P1	COL9A2	CCACCTTGTTGGTGGCTGGCGGCGAGACCAAGTTTAAGAGCTAAGCTG	GTGGCTGGCGGCGAGACCAA
COL9A2_-_40782921.23-P1	COL9A2	CCACCTTGTTGGGTGTCCGCGCACGCACCGAGTTTAAGAGCTAAGCTG	GGTGTCCGCGCACGCACCGA
COL9A2_-_40782934.23-P1	COL9A2	CCACCTTGTTGGCACCGACGGCAGAGTCTCCGTTTAAGAGCTAAGCTG	GCACCGACGGCAGAGTCTCC
COL9A2_+_40782476.23-P1	COL9A2	CCACCTTGTTGGCAGGTGGCGGGGCATACAAGTTTAAGAGCTAAGCTG	GCAGGTGGCGGGGCATACAA
COL9A2_+_40782915.23-P1	COL9A2	CCACCTTGTTGGCGCCGGGAGACTCTGCCGTGTTTAAGAGCTAAGCTG	GCGCCGGGAGACTCTGCCGT
COL9A2_-_40781080.23-P2	COL9A2	CCACCTTGTTGGTAACGGGCTCCGCATGTCAGTTTAAGAGCTAAGCTG	GTAACGGGCTCCGCATGTCA
COL9A2_-_40781065.23-P2	COL9A2	CCACCTTGTTGGGTCTGTCGGCGGCTATAACGTTTAAGAGCTAAGCTG	GGTCTGTCGGCGGCTATAAC
COL9A2_-_40781018.23-P2	COL9A2	CCACCTTGTTGGGAGGCCTCGCTGTGAGCTGGTTTAAGAGCTAAGCTG	GGAGGCCTCGCTGTGAGCTG
COL9A2_+_40781068.23-P2	COL9A2	CCACCTTGTTGGTCAAACCAGCCCTGACATGGTTTAAGAGCTAAGCTG	GTCAAACCAGCCCTGACATG
COL9A2_-_40781055.23-P2	COL9A2	CCACCTTGTTGGGCAGCTCCTTGTCTGTCGGGTTTAAGAGCTAAGCTG	GGCAGCTCCTTGTCTGTCGG
COL9A3_-_61448817.23-P1P2	COL9A3	CCACCTTGTTGGGTCTCACCGAGGAGAGCGGGTTTAAGAGCTAAGCTG	GGTCTCACCGAGGAGAGCGG
COL9A3_-_61448814.23-P1P2	COL9A3	CCACCTTGTTGGTGGGTCTCACCGAGGAGAGGTTTAAGAGCTAAGCTG	GTGGGTCTCACCGAGGAGAG
COL9A3_+_61448780.23-P1P2	COL9A3	CCACCTTGTTGGTGAGACCCAAAGCCTCGGGGTTTAAGAGCTAAGCTG	GTGAGACCCAAAGCCTCGGG
COL9A3_-_61448882.23-P1P2	COL9A3	CCACCTTGTTGGCGCCGGGTCAGGCCCACGGGTTTAAGAGCTAAGCTG	GCGCCGGGTCAGGCCCACGG
COL9A3_+_61448802.23-P1P2	COL9A3	CCACCTTGTTGGCGACGACCGCCGCTCTCCTGTTTAAGAGCTAAGCTG	GCGACGACCGCCGCTCTCCT
COMP_-_18902082.23-P1P2	COMP	CCACCTTGTTGGGCGGTGTCGGGGACCATGGGTTTAAGAGCTAAGCTG	GGCGGTGTCGGGGACCATGG
COMP_+_18901612.23-P1P2	COMP	CCACCTTGTTGGGGAGTGCCAGGGAACGGAAGTTTAAGAGCTAAGCTG	GGGAGTGCCAGGGAACGGAA
COMP_-_18902085.23-P1P2	COMP	CCACCTTGTTGGGTGTCGGGGACCATGGCGGGTTTAAGAGCTAAGCTG	GGTGTCGGGGACCATGGCGG
COMP_-_18902064.23-P1P2	COMP	CCACCTTGTTGGGTGAGCAGAAGAACGCAGGGTTTAAGAGCTAAGCTG	GGTGAGCAGAAGAACGCAGG
COMP_-_18902079.23-P1P2	COMP	CCACCTTGTTGGCAGGCGGTGTCGGGGACCAGTTTAAGAGCTAAGCTG	GCAGGCGGTGTCGGGGACCA
CPA6_-_68658572.23-P1P2	CPA6	CCACCTTGTTGGGGAAGTTGCTATTACGACTGTTTAAGAGCTAAGCTG	GGGAAGTTGCTATTACGACT
CPA6_+_68658631.23-P1P2	CPA6	CCACCTTGTTGGGGAGGCCCAGCCCTTTCTAGTTTAAGAGCTAAGCTG	GGGAGGCCCAGCCCTTTCTA
CPA6_+_68658402.23-P1P2	CPA6	CCACCTTGTTGGAGCCACCTCCAGCCTCGGGGTTTAAGAGCTAAGCTG	GAGCCACCTCCAGCCTCGGG
CPA6_+_68658611.23-P1P2	CPA6	CCACCTTGTTGGGGGAGCCTGATTAAAGATCGTTTAAGAGCTAAGCTG	GGGGAGCCTGATTAAAGATC
CPA6_-_68658579.23-P1P2	CPA6	CCACCTTGTTGGGCTATTACGACTTGGTCTTGTTTAAGAGCTAAGCTG	GGCTATTACGACTTGGTCTT
CPD_-_28706001.23-P1P2	CPD	CCACCTTGTTGGTAGCGGCGCTGCTGGAAGAGTTTAAGAGCTAAGCTG	GTAGCGGCGCTGCTGGAAGA
CPD_-_28706033.23-P1P2	CPD	CCACCTTGTTGGGGACGAGCGGCCGCCTTGGGTTTAAGAGCTAAGCTG	GGGACGAGCGGCCGCCTTGG
CPD_+_28705973.23-P1P2	CPD	CCACCTTGTTGGCCAGCAGCGCCGCTAACCCGTTTAAGAGCTAAGCTG	GCCAGCAGCGCCGCTAACCC
CPD_-_28705985.23-P1P2	CPD	CCACCTTGTTGGGGAGCGGAGCCGGGGTTAGGTTTAAGAGCTAAGCTG	GGGAGCGGAGCCGGGGTTAG
CPD_+_28706022.23-P1P2	CPD	CCACCTTGTTGGGCCGCCCTAGCCGCCAAGGGTTTAAGAGCTAAGCTG	GGCCGCCCTAGCCGCCAAGG
CPM_-_69326954.23-P1P2	CPM	CCACCTTGTTGGgcgcacctctacccacccgGTTTAAGAGCTAAGCTG	Ggcgcacctctacccacccg
CPM_-_69326580.23-P1P2	CPM	CCACCTTGTTGGAATCCAGCGCAGCTACCAAGTTTAAGAGCTAAGCTG	GAATCCAGCGCAGCTACCAA
CPM_+_69326981.23-P1P2	CPM	CCACCTTGTTGGgcgcgcccgccctctgaccGTTTAAGAGCTAAGCTG	Ggcgcgcccgccctctgacc
CPM_-_69326742.23-P1P2	CPM	CCACCTTGTTGGtgacgctccctgcctcctaGTTTAAGAGCTAAGCTG	Gtgacgctccctgcctccta
CPM_-_69326608.23-P1P2	CPM	CCACCTTGTTGGCAGCCCTAGCCAGAGGCACGTTTAAGAGCTAAGCTG	GCAGCCCTAGCCAGAGGCAC
CPN1_-_101841001.23-P1P2	CPN1	CCACCTTGTTGGTATAGCTCCCCAGAGGCAGGTTTAAGAGCTAAGCTG	GTATAGCTCCCCAGAGGCAG
CPN1_-_101841178.23-P1P2	CPN1	CCACCTTGTTGGACAGGGCTCGTGGATTCCAGTTTAAGAGCTAAGCTG	GACAGGGCTCGTGGATTCCA
CPN1_-_101841181.23-P1P2	CPN1	CCACCTTGTTGGGGGCTCGTGGATTCCAGGGGTTTAAGAGCTAAGCTG	GGGGCTCGTGGATTCCAGGG
CPN1_-_101841326.23-P1P2	CPN1	CCACCTTGTTGGTGGTGGCGAAAGGTCACCGGTTTAAGAGCTAAGCTG	GTGGTGGCGAAAGGTCACCG
CPN1_+_101841125.23-P1P2	CPN1	CCACCTTGTTGGCAGCTCTTGAGGGTGTGTGGTTTAAGAGCTAAGCTG	GCAGCTCTTGAGGGTGTGTG
CPZ_-_8594858.23-P1P2	CPZ	CCACCTTGTTGGACACCAGGGAGGCTCTCTAGTTTAAGAGCTAAGCTG	GACACCAGGGAGGCTCTCTA
CPZ_+_8594586.23-P1P2	CPZ	CCACCTTGTTGGGGCGACGACCAGGACTGTAGTTTAAGAGCTAAGCTG	GGGCGACGACCAGGACTGTA
CPZ_+_8594519.23-P1P2	CPZ	CCACCTTGTTGGGACGGCCAGCGCAGTGATGGTTTAAGAGCTAAGCTG	GGACGGCCAGCGCAGTGATG
CPZ_-_8594848.23-P1P2	CPZ	CCACCTTGTTGGCTGGACGGGGACACCAGGGGTTTAAGAGCTAAGCTG	GCTGGACGGGGACACCAGGG
CPZ_-_8594545.23-P1P2	CPZ	CCACCTTGTTGGTCACTGCGCTGGCCGTCCAGTTTAAGAGCTAAGCTG	GTCACTGCGCTGGCCGTCCA
CR1_+_207669636.23-P1P2	CR1	CCACCTTGTTGGCCGGCGGCCCGACAGGCTCGTTTAAGAGCTAAGCTG	GCCGGCGGCCCGACAGGCTC
CR1_-_207669650.23-P1P2	CR1	CCACCTTGTTGGAAGAAGCCCGGAGCCTGTCGTTTAAGAGCTAAGCTG	GAAGAAGCCCGGAGCCTGTC
CR1_-_207670068.23-P1P2	CR1	CCACCTTGTTGGGCTGGCTATAGCCAAGACGGTTTAAGAGCTAAGCTG	GGCTGGCTATAGCCAAGACG
CR1_-_207669617.23-P1P2	CR1	CCACCTTGTTGGGATGTGCTTGGGGAGAATGGTTTAAGAGCTAAGCTG	GGATGTGCTTGGGGAGAATG
CR1_+_207669642.23-P1P2	CR1	CCACCTTGTTGGCGGGCGCCGGCGGCCCGACGTTTAAGAGCTAAGCTG	GCGGGCGCCGGCGGCCCGAC
CR2_-_207627638.23-P1P2	CR2	CCACCTTGTTGGTCAGAACTAGCACGTGTGCGTTTAAGAGCTAAGCTG	GTCAGAACTAGCACGTGTGC
CR2_-_207628052.23-P1P2	CR2	CCACCTTGTTGGTGGAGGCTGCGCCACAGAGGTTTAAGAGCTAAGCTG	GTGGAGGCTGCGCCACAGAG
CR2_+_207627709.23-P1P2	CR2	CCACCTTGTTGGTCCGAGACCCGCGAGCGTCGTTTAAGAGCTAAGCTG	GTCCGAGACCCGCGAGCGTC
CR2_-_207628076.23-P1P2	CR2	CCACCTTGTTGGCTGTCTGGTCGGCCCGGTGGTTTAAGAGCTAAGCTG	GCTGTCTGGTCGGCCCGGTG
CR2_+_207627741.23-P1P2	CR2	CCACCTTGTTGGGCCACGGCCGAAGCCCCCGGTTTAAGAGCTAAGCTG	GGCCACGGCCGAAGCCCCCG
CRB2_+_126118537.23-P1	CRB2	CCACCTTGTTGGCCAGGCCTGGCCAGCGCCAGTTTAAGAGCTAAGCTG	GCCAGGCCTGGCCAGCGCCA
CRB2_-_126118533.23-P1	CRB2	CCACCTTGTTGGGCCGAGCAGAGCGCAGAGCGTTTAAGAGCTAAGCTG	GGCCGAGCAGAGCGCAGAGC
CRB2_+_126118494.23-P1	CRB2	CCACCTTGTTGGCGGCTGCTGTGAGAACGGGGTTTAAGAGCTAAGCTG	GCGGCTGCTGTGAGAACGGG
CRB2_-_126118542.23-P1	CRB2	CCACCTTGTTGGAGCGCAGAGCGGGCTGCCAGTTTAAGAGCTAAGCTG	GAGCGCAGAGCGGGCTGCCA
CRB2_+_126118497.23-P1	CRB2	CCACCTTGTTGGGCTCGGCTGCTGTGAGAACGTTTAAGAGCTAAGCTG	GGCTCGGCTGCTGTGAGAAC
CRB2_-_126131454.23-P2	CRB2	CCACCTTGTTGGGATCCCTAGAGGGAGGATGGTTTAAGAGCTAAGCTG	GGATCCCTAGAGGGAGGATG
CRB2_-_126131081.23-P2	CRB2	CCACCTTGTTGGCCTGAGCAGGCTCCGAAGGGTTTAAGAGCTAAGCTG	GCCTGAGCAGGCTCCGAAGG
CRB2_+_126131139.23-P2	CRB2	CCACCTTGTTGGCAGACAGGTTGAGAGTGGTGTTTAAGAGCTAAGCTG	GCAGACAGGTTGAGAGTGGT
CRB2_-_126131448.23-P2	CRB2	CCACCTTGTTGGTGAAGGGATCCCTAGAGGGGTTTAAGAGCTAAGCTG	GTGAAGGGATCCCTAGAGGG
CRB2_-_126131078.23-P2	CRB2	CCACCTTGTTGGATTCCTGAGCAGGCTCCGAGTTTAAGAGCTAAGCTG	GATTCCTGAGCAGGCTCCGA
CRELD1_+_9975595.23-P1P2	CRELD1	CCACCTTGTTGGGAAGGATCCAGACCCTCGTGTTTAAGAGCTAAGCTG	GGAAGGATCCAGACCCTCGT
CRELD1_+_9975583.23-P1P2	CRELD1	CCACCTTGTTGGCCCTCGTAGGCCACGGAGAGTTTAAGAGCTAAGCTG	GCCCTCGTAGGCCACGGAGA
CRELD1_+_9975964.23-P1P2	CRELD1	CCACCTTGTTGGGCCAAACTGGGTATTGCAGGTTTAAGAGCTAAGCTG	GGCCAAACTGGGTATTGCAG
CRELD1_-_9975547.23-P1P2	CRELD1	CCACCTTGTTGGCAGCGACGCGGTGAGGAGAGTTTAAGAGCTAAGCTG	GCAGCGACGCGGTGAGGAGA
CRELD1_+_9975787.23-P1P2	CRELD1	CCACCTTGTTGGGGCCGGATCCGCAGAATTAGTTTAAGAGCTAAGCTG	GGGCCGGATCCGCAGAATTA
CRHR1_-_43861696.23-P1P2	CRHR1	CCACCTTGTTGGGGGCTGCGTCGGGAAACGGGTTTAAGAGCTAAGCTG	GGGGCTGCGTCGGGAAACGG
CRHR1_-_43861918.23-P1P2	CRHR1	CCACCTTGTTGGAGCGAGCCCGAGGATGGGAGTTTAAGAGCTAAGCTG	GAGCGAGCCCGAGGATGGGA
CRHR1_+_43862099.23-P1P2	CRHR1	CCACCTTGTTGGTACCCAACCCTGGCTCCAAGTTTAAGAGCTAAGCTG	GTACCCAACCCTGGCTCCAA
CRHR1_-_43862118.23-P1P2	CRHR1	CCACCTTGTTGGGACCTTTGGAGCCAGGGTTGTTTAAGAGCTAAGCTG	GGACCTTTGGAGCCAGGGTT
CRHR1_-_43861914.23-P1P2	CRHR1	CCACCTTGTTGGGCCGAGCGAGCCCGAGGATGTTTAAGAGCTAAGCTG	GGCCGAGCGAGCCCGAGGAT
CRHR2_+_30722093.23-P1P2	CRHR2	CCACCTTGTTGGCGCAGCTCCGTGCACTCGGGTTTAAGAGCTAAGCTG	GCGCAGCTCCGTGCACTCGG
CRHR2_+_30722046.23-P1P2	CRHR2	CCACCTTGTTGGGACAGCTCTGGGCGACCGGGTTTAAGAGCTAAGCTG	GGACAGCTCTGGGCGACCGG
CRHR2_-_30721682.23-P1P2	CRHR2	CCACCTTGTTGGGGCGGGAGAGAGCGCAGTAGTTTAAGAGCTAAGCTG	GGGCGGGAGAGAGCGCAGTA
CRHR2_+_30722033.23-P1P2	CRHR2	CCACCTTGTTGGGACCGGAGGTGGCGCCCAAGTTTAAGAGCTAAGCTG	GGACCGGAGGTGGCGCCCAA
CRHR2_+_30722015.23-P1P2	CRHR2	CCACCTTGTTGGAAGGCTGCCCGGGAGATCGGTTTAAGAGCTAAGCTG	GAAGGCTGCCCGGGAGATCG
CRLF2_-_1331495.23-P1P2	CRLF2	CCACCTTGTTGGCAGCCTCCCAGCAGAAAGAGTTTAAGAGCTAAGCTG	GCAGCCTCCCAGCAGAAAGA
CRLF2_-_1331561.23-P1P2	CRLF2	CCACCTTGTTGGGTGGAGAGTGAGGTCCTCAGTTTAAGAGCTAAGCTG	GGTGGAGAGTGAGGTCCTCA
CRLF2_+_1331518.23-P1P2	CRLF2	CCACCTTGTTGGTCCTGTTTCAGGCATGGGGGTTTAAGAGCTAAGCTG	GTCCTGTTTCAGGCATGGGG
CRLF2_-_1331538.23-P1P2	CRLF2	CCACCTTGTTGGGCCGCCCCATGCCTGAAACGTTTAAGAGCTAAGCTG	GGCCGCCCCATGCCTGAAAC
CRLF2_+_1331502.23-P1P2	CRLF2	CCACCTTGTTGGGGGCGGCTGGTTCTGCTGTGTTTAAGAGCTAAGCTG	GGGGCGGCTGGTTCTGCTGT
CRTAC1_+_99789912.23-P1P2	CRTAC1	CCACCTTGTTGGCAGCTGGCAGAGAAAGTGTGTTTAAGAGCTAAGCTG	GCAGCTGGCAGAGAAAGTGT
CRTAC1_+_99790171.23-P1P2	CRTAC1	CCACCTTGTTGGACCGGTGCCCCCCACCCTAGTTTAAGAGCTAAGCTG	GACCGGTGCCCCCCACCCTA
CRTAC1_+_99789884.23-P1P2	CRTAC1	CCACCTTGTTGGACTGGAGGTCAGCTGTCAGGTTTAAGAGCTAAGCTG	GACTGGAGGTCAGCTGTCAG
CRTAC1_-_99790332.23-P1P2	CRTAC1	CCACCTTGTTGGTGCTCCCAGCCCCGGTCCCGTTTAAGAGCTAAGCTG	GTGCTCCCAGCCCCGGTCCC
CRTAC1_+_99790351.23-P1P2	CRTAC1	CCACCTTGTTGGAAGCGAGCGCGCGGCGTCGGTTTAAGAGCTAAGCTG	GAAGCGAGCGCGCGGCGTCG
CRTAM_-_122735384.23-P1P2	CRTAM	CCACCTTGTTGGAGTACATCGGAGATTGACAGTTTAAGAGCTAAGCTG	GAGTACATCGGAGATTGACA
CRTAM_-_122735372.23-P1P2	CRTAM	CCACCTTGTTGGACGGAAGATTCTAGTACATGTTTAAGAGCTAAGCTG	GACGGAAGATTCTAGTACAT
CRTAM_+_122735583.23-P1P2	CRTAM	CCACCTTGTTGGagtatgtcaagaagccgagGTTTAAGAGCTAAGCTG	Gagtatgtcaagaagccgag
CRTAM_+_122735421.23-P1P2	CRTAM	CCACCTTGTTGGAGTGGGTGACACTTACCGGGTTTAAGAGCTAAGCTG	GAGTGGGTGACACTTACCGG
CRTAM_-_122735354.23-P1P2	CRTAM	CCACCTTGTTGGTTCACTTTAGTCTCAGTAAGTTTAAGAGCTAAGCTG	GTTCACTTTAGTCTCAGTAA
CRTAP_-_33155738.23-P1P2	CRTAP	CCACCTTGTTGGACGCGCTGGACAAGTACAGGTTTAAGAGCTAAGCTG	GACGCGCTGGACAAGTACAG
CRTAP_+_33155889.23-P1P2	CRTAP	CCACCTTGTTGGGCGCAGCAGGCCCCCGAAGGTTTAAGAGCTAAGCTG	GGCGCAGCAGGCCCCCGAAG
CRTAP_+_33155545.23-P1P2	CRTAP	CCACCTTGTTGGCGCCCGGCGAaaggaaggaGTTTAAGAGCTAAGCTG	GCGCCCGGCGAaaggaagga
CRTAP_+_33156007.23-P1P2	CRTAP	CCACCTTGTTGGCGAACTGCAGGAACTTGTAGTTTAAGAGCTAAGCTG	GCGAACTGCAGGAACTTGTA
CRTAP_-_33155762.23-P1P2	CRTAP	CCACCTTGTTGGAGCACTGGGCCGAGAGCGTGTTTAAGAGCTAAGCTG	GAGCACTGGGCCGAGAGCGT
CSF1_-_110453919.23-P1P2	CSF1	CCACCTTGTTGGGGCTTCCCTGGGAAACGGAGTTTAAGAGCTAAGCTG	GGGCTTCCCTGGGAAACGGA
CSF1_+_110453523.23-P1P2	CSF1	CCACCTTGTTGGTGTCCTGGGATGCGGAGAGGTTTAAGAGCTAAGCTG	GTGTCCTGGGATGCGGAGAG
CSF1_+_110453507.23-P1P2	CSF1	CCACCTTGTTGGGAGCGGCTCTGGCGCCGAGGTTTAAGAGCTAAGCTG	GGAGCGGCTCTGGCGCCGAG
CSF1_+_110453536.23-P1P2	CSF1	CCACCTTGTTGGAGGGCCGCACCGCTGTCCTGTTTAAGAGCTAAGCTG	GAGGGCCGCACCGCTGTCCT
CSF1_+_110453678.23-P1P2	CSF1	CCACCTTGTTGGcgcggccgTCGCTTACCGTGTTTAAGAGCTAAGCTG	GcgcggccgTCGCTTACCGT
CSF1R_-_149465687.23-P1P2	CSF1R	CCACCTTGTTGGgaagcctcaagagtatcagGTTTAAGAGCTAAGCTG	Ggaagcctcaagagtatcag
CSF1R_-_149465864.23-P1P2	CSF1R	CCACCTTGTTGGCCTGAGGACACCCAGTGAGGTTTAAGAGCTAAGCTG	GCCTGAGGACACCCAGTGAG
CSF1R_+_149466064.23-P1P2	CSF1R	CCACCTTGTTGGTCCAGTGTCCCGATCCCTGGTTTAAGAGCTAAGCTG	GTCCAGTGTCCCGATCCCTG
CSF1R_-_149466077.23-P1P2	CSF1R	CCACCTTGTTGGTACTAGCTCCGCAGGGATCGTTTAAGAGCTAAGCTG	GTACTAGCTCCGCAGGGATC
CSF1R_+_149466139.23-P1P2	CSF1R	CCACCTTGTTGGGAAGAAGAGGATCAGCCCAGTTTAAGAGCTAAGCTG	GGAAGAAGAGGATCAGCCCA
CSF2RA_+_1387764.23-P1P2	CSF2RA	CCACCTTGTTGGAGAACTTAGCTTACCCCCAGTTTAAGAGCTAAGCTG	GAGAACTTAGCTTACCCCCA
CSF2RA_-_1387717.23-P1P2	CSF2RA	CCACCTTGTTGGGAAGGGAGCTACTCAGAAGGTTTAAGAGCTAAGCTG	GGAAGGGAGCTACTCAGAAG
CSF2RA_-_1388200.23-P1P2	CSF2RA	CCACCTTGTTGGgtgaattcacagctatctgGTTTAAGAGCTAAGCTG	Ggtgaattcacagctatctg
CSF2RA_-_1387770.23-P1P2	CSF2RA	CCACCTTGTTGGGAGAGGAAGCGGATGCCGTGTTTAAGAGCTAAGCTG	GGAGAGGAAGCGGATGCCGT
CSF2RA_-_1387742.23-P1P2	CSF2RA	CCACCTTGTTGGTCTCCGAGAGAAGAAAAGCGTTTAAGAGCTAAGCTG	GTCTCCGAGAGAAGAAAAGC
CSF2RB_+_37309709.23-P1P2	CSF2RB	CCACCTTGTTGGGCCGGGCCATACCTCTGTGGTTTAAGAGCTAAGCTG	GGCCGGGCCATACCTCTGTG
CSF2RB_-_37309900.23-P1P2	CSF2RB	CCACCTTGTTGGACCTGAGCCCAGACTCCTAGTTTAAGAGCTAAGCTG	GACCTGAGCCCAGACTCCTA
CSF2RB_-_37309724.23-P1P2	CSF2RB	CCACCTTGTTGGCTCCCACCACACAGAGGTAGTTTAAGAGCTAAGCTG	GCTCCCACCACACAGAGGTA
CSF2RB_+_37310056.23-P1P2	CSF2RB	CCACCTTGTTGGcaaagcgaagacagactatGTTTAAGAGCTAAGCTG	Gcaaagcgaagacagactat
CSF2RB_-_37309916.23-P1P2	CSF2RB	CCACCTTGTTGGCTAGGGCGGCCAGTGGATGGTTTAAGAGCTAAGCTG	GCTAGGGCGGCCAGTGGATG
CSMD1_+_4852109.23-P1P2	CSMD1	CCACCTTGTTGGCGGGACCCGATGCTATGAGGTTTAAGAGCTAAGCTG	GCGGGACCCGATGCTATGAG
CSMD1_+_4851923.23-P1P2	CSMD1	CCACCTTGTTGGTGCAGACATGACTGCGTGGGTTTAAGAGCTAAGCTG	GTGCAGACATGACTGCGTGG
CSMD1_+_4851852.23-P1P2	CSMD1	CCACCTTGTTGGGGCTCCTCACTGCAGCGAAGTTTAAGAGCTAAGCTG	GGGCTCCTCACTGCAGCGAA
CSMD1_-_4851917.23-P1P2	CSMD1	CCACCTTGTTGGGAGAAGCAGGAGCAGCGACGTTTAAGAGCTAAGCTG	GGAGAAGCAGGAGCAGCGAC
CSMD1_-_4852024.23-P1P2	CSMD1	CCACCTTGTTGGGAGCCAAATAATCACCCGAGTTTAAGAGCTAAGCTG	GGAGCCAAATAATCACCCGA
CSPG5_+_47620281.23-P1P2	CSPG5	CCACCTTGTTGGTCCTCGCGCTGCCCATCGTGTTTAAGAGCTAAGCTG	GTCCTCGCGCTGCCCATCGT
CSPG5_-_47620291.23-P1P2	CSPG5	CCACCTTGTTGGGGCCGCCTCAGCCCACGATGTTTAAGAGCTAAGCTG	GGGCCGCCTCAGCCCACGAT
CSPG5_-_47619893.23-P1P2	CSPG5	CCACCTTGTTGGGTCCCGGCTACCCCAACCGGTTTAAGAGCTAAGCTG	GGTCCCGGCTACCCCAACCG
CSPG5_+_47620320.23-P1P2	CSPG5	CCACCTTGTTGGcggggacagcggcggacggGTTTAAGAGCTAAGCTG	Gcggggacagcggcggacgg
CSPG5_+_47619934.23-P1P2	CSPG5	CCACCTTGTTGGgcggcggAATGGTCCCAGGGTTTAAGAGCTAAGCTG	GgcggcggAATGGTCCCAGG
CTGF_-_132272027.23-P1P2	CTGF	CCACCTTGTTGGCAGCTGCTTGGCGCAGACGGTTTAAGAGCTAAGCTG	GCAGCTGCTTGGCGCAGACG
CTGF_-_132272478.23-P1P2	CTGF	CCACCTTGTTGGCTGGAGGGTGGAGTCGCACGTTTAAGAGCTAAGCTG	GCTGGAGGGTGGAGTCGCAC
CTGF_-_132272464.23-P1P2	CTGF	CCACCTTGTTGGCGGCTGCCGTCGAGCTGGAGTTTAAGAGCTAAGCTG	GCGGCTGCCGTCGAGCTGGA
CTGF_-_132272054.23-P1P2	CTGF	CCACCTTGTTGGGCCGCAGCCGTCCAGCACGGTTTAAGAGCTAAGCTG	GGCCGCAGCCGTCCAGCACG
CTGF_-_132272093.23-P1P2	CTGF	CCACCTTGTTGGGCGCGGCGCCGGCTCGTCCGTTTAAGAGCTAAGCTG	GGCGCGGCGCCGGCTCGTCC
CTHRC1_+_104383835.23-P1P2	CTHRC1	CCACCTTGTTGGCTGGAGGCGGAGGAGACCGGTTTAAGAGCTAAGCTG	GCTGGAGGCGGAGGAGACCG
CTHRC1_-_104384022.23-P1P2	CTHRC1	CCACCTTGTTGGGCGCAGCTCCGGCAGAGGGGTTTAAGAGCTAAGCTG	GGCGCAGCTCCGGCAGAGGG
CTHRC1_-_104383793.23-P1P2	CTHRC1	CCACCTTGTTGGGCATTGATGCAGCCTGCGGGTTTAAGAGCTAAGCTG	GGCATTGATGCAGCCTGCGG
CTHRC1_-_104383770.23-P1P2	CTHRC1	CCACCTTGTTGGAGAGAGGCGCGCGGGTGAAGTTTAAGAGCTAAGCTG	GAGAGAGGCGCGCGGGTGAA
CTHRC1_-_104383799.23-P1P2	CTHRC1	CCACCTTGTTGGATGCAGCCTGCGGCGGCCTGTTTAAGAGCTAAGCTG	GATGCAGCCTGCGGCGGCCT
CTLA4_-_204732957.23-P1P2	CTLA4	CCACCTTGTTGGAGTTGGGCGGCAGCAAATAGTTTAAGAGCTAAGCTG	GAGTTGGGCGGCAGCAAATA
CTLA4_-_204732923.23-P1P2	CTLA4	CCACCTTGTTGGTGGCTGGCTCTGTATTCCAGTTTAAGAGCTAAGCTG	GTGGCTGGCTCTGTATTCCA
CTLA4_-_204733000.23-P1P2	CTLA4	CCACCTTGTTGGAGCGCCAGGTATTTAGTAGGTTTAAGAGCTAAGCTG	GAGCGCCAGGTATTTAGTAG
CTLA4_+_204732673.23-P1P2	CTLA4	CCACCTTGTTGGCTTGTGCCGCTGAAATCCAGTTTAAGAGCTAAGCTG	GCTTGTGCCGCTGAAATCCA
CTLA4_-_204732544.23-P1P2	CTLA4	CCACCTTGTTGGACATGTGTAATACATATCTGTTTAAGAGCTAAGCTG	GACATGTGTAATACATATCT
CTRB1_+_75252970.23-P1P2	CTRB1	CCACCTTGTTGGCCCTCAGGACAGACCCCTCGTTTAAGAGCTAAGCTG	GCCCTCAGGACAGACCCCTC
CTRB1_+_75252951.23-P1P2	CTRB1	CCACCTTGTTGGGGGCACCAGCACTCACCAAGTTTAAGAGCTAAGCTG	GGGGCACCAGCACTCACCAA
CTRB1_+_75252936.23-P1P2	CTRB1	CCACCTTGTTGGCCAAAGGCGGCCCCCACAAGTTTAAGAGCTAAGCTG	GCCAAAGGCGGCCCCCACAA
CTRB1_-_75252897.23-P1P2	CTRB1	CCACCTTGTTGGGCAGGCCCCACACCTTCTGGTTTAAGAGCTAAGCTG	GGCAGGCCCCACACCTTCTG
CTRB1_+_75253108.23-P1P2	CTRB1	CCACCTTGTTGGCTCCTGGAGCAGGTTGTGTGTTTAAGAGCTAAGCTG	GCTCCTGGAGCAGGTTGTGT
CTRB2_-_75240992.23-P1P2	CTRB2	CCACCTTGTTGGAGGGCCTGGCACTCACCGAGTTTAAGAGCTAAGCTG	GAGGGCCTGGCACTCACCGA
CTRB2_+_75240642.23-P1P2	CTRB2	CCACCTTGTTGGCAGTCAGCGGCCCCAGCACGTTTAAGAGCTAAGCTG	GCAGTCAGCGGCCCCAGCAC
CTRB2_-_75240995.23-P1P2	CTRB2	CCACCTTGTTGGGCCTGGCACTCACCGAAGGGTTTAAGAGCTAAGCTG	GGCCTGGCACTCACCGAAGG
CTRB2_+_75241035.23-P1P2	CTRB2	CCACCTTGTTGGACCCCTGCCAGCGGCACCAGTTTAAGAGCTAAGCTG	GACCCCTGCCAGCGGCACCA
CTRB2_+_75240654.23-P1P2	CTRB2	CCACCTTGTTGGGAAACCCCCAAACAGTCAGGTTTAAGAGCTAAGCTG	GGAAACCCCCAAACAGTCAG
CX3CL1_-_57406840.23-P1P2	CX3CL1	CCACCTTGTTGGGCATAAGGGAGCCAGGTGTGTTTAAGAGCTAAGCTG	GGCATAAGGGAGCCAGGTGT
CX3CL1_+_57406455.23-P1P2	CX3CL1	CCACCTTGTTGGTGAGGGTGGGCAAGAGTCCGTTTAAGAGCTAAGCTG	GTGAGGGTGGGCAAGAGTCC
CX3CL1_+_57406449.23-P1P2	CX3CL1	CCACCTTGTTGGTGGGCAAGAGTCCCGGCGGGTTTAAGAGCTAAGCTG	GTGGGCAAGAGTCCCGGCGG
CX3CL1_+_57406426.23-P1P2	CX3CL1	CCACCTTGTTGGCAGGCAGGCGGCTAGAGCCGTTTAAGAGCTAAGCTG	GCAGGCAGGCGGCTAGAGCC
CX3CL1_+_57406830.23-P1P2	CX3CL1	CCACCTTGTTGGCTCCTGGCACACCCACACCGTTTAAGAGCTAAGCTG	GCTCCTGGCACACCCACACC
CXADR_+_18885801.23-P1P2	CXADR	CCACCTTGTTGGGAAAGGCAAGCCCGCACCGGTTTAAGAGCTAAGCTG	GGAAAGGCAAGCCCGCACCG
CXADR_+_18885348.23-P1P2	CXADR	CCACCTTGTTGGGCTCCCGACTGGCTCGCGGGTTTAAGAGCTAAGCTG	GGCTCCCGACTGGCTCGCGG
CXADR_-_18885366.23-P1P2	CXADR	CCACCTTGTTGGCCGCCGCCGCGAGCCAGTCGTTTAAGAGCTAAGCTG	GCCGCCGCCGCGAGCCAGTC
CXADR_+_18885786.23-P1P2	CXADR	CCACCTTGTTGGACCGGGGCAGAGAATGCTAGTTTAAGAGCTAAGCTG	GACCGGGGCAGAGAATGCTA
CXADR_+_18885672.23-P1P2	CXADR	CCACCTTGTTGGTGCGCGGCTCCCTACGGGAGTTTAAGAGCTAAGCTG	GTGCGCGGCTCCCTACGGGA
CXCL16_+_4642801.23-P1P2	CXCL16	CCACCTTGTTGGAGTACTGAGCGCACGGTCGGTTTAAGAGCTAAGCTG	GAGTACTGAGCGCACGGTCG
CXCL16_-_4643151.23-P1P2	CXCL16	CCACCTTGTTGGCGCGCTGCATGAGCCTCCCGTTTAAGAGCTAAGCTG	GCGCGCTGCATGAGCCTCCC
CXCL16_-_4643154.23-P1P2	CXCL16	CCACCTTGTTGGGCTGCATGAGCCTCCCGGGGTTTAAGAGCTAAGCTG	GGCTGCATGAGCCTCCCGGG
CXCL16_-_4643057.23-P1P2	CXCL16	CCACCTTGTTGGCGTCCGCCGACCTGTGAGGGTTTAAGAGCTAAGCTG	GCGTCCGCCGACCTGTGAGG
CXCL16_+_4643156.23-P1P2	CXCL16	CCACCTTGTTGGTGGCGGCGACTCTCTCCACGTTTAAGAGCTAAGCTG	GTGGCGGCGACTCTCTCCAC
CXorf66_+_139047259.23-P1P2	CXorf66	CCACCTTGTTGGGGGACTTAACATACAGTAGGTTTAAGAGCTAAGCTG	GGGGACTTAACATACAGTAG
CXorf66_-_139047587.23-P1P2	CXorf66	CCACCTTGTTGGCCTGTAGTAGAAGATCCATGTTTAAGAGCTAAGCTG	GCCTGTAGTAGAAGATCCAT
CXorf66_+_139047441.23-P1P2	CXorf66	CCACCTTGTTGGTAGCAGTGTTAACATTAGTGTTTAAGAGCTAAGCTG	GTAGCAGTGTTAACATTAGT
CXorf66_+_139047278.23-P1P2	CXorf66	CCACCTTGTTGGATATAAATGAATCTGGCAAGTTTAAGAGCTAAGCTG	GATATAAATGAATCTGGCAA
CXorf66_-_139047592.23-P1P2	CXorf66	CCACCTTGTTGGAGTAGAAGATCCATTGGTTGTTTAAGAGCTAAGCTG	GAGTAGAAGATCCATTGGTT
CYYR1_-_27945141.23-P1P2	CYYR1	CCACCTTGTTGGAGCCCGGACCGTGACCCAAGTTTAAGAGCTAAGCTG	GAGCCCGGACCGTGACCCAA
CYYR1_+_27945171.23-P1P2	CYYR1	CCACCTTGTTGGTACGCAGGTCAGTGACGGAGTTTAAGAGCTAAGCTG	GTACGCAGGTCAGTGACGGA
CYYR1_+_27945112.23-P1P2	CYYR1	CCACCTTGTTGGTCACGGTCCGGGCTAACGTGTTTAAGAGCTAAGCTG	GTCACGGTCCGGGCTAACGT
CYYR1_+_27945175.23-P1P2	CYYR1	CCACCTTGTTGGTGTCTACGCAGGTCAGTGAGTTTAAGAGCTAAGCTG	GTGTCTACGCAGGTCAGTGA
CYYR1_+_27945225.23-P1P2	CYYR1	CCACCTTGTTGGAGGCTACCCGTGCGTCCAGGTTTAAGAGCTAAGCTG	GAGGCTACCCGTGCGTCCAG
DCBLD1_-_117803842.23-P1P2	DCBLD1	CCACCTTGTTGGCAGCGACTGCGCCCCGTCCGTTTAAGAGCTAAGCTG	GCAGCGACTGCGCCCCGTCC
DCBLD1_-_117803863.23-P1P2	DCBLD1	CCACCTTGTTGGGCGCCGCGCTCGTCCGCAGGTTTAAGAGCTAAGCTG	GGCGCCGCGCTCGTCCGCAG
DCBLD1_-_117803866.23-P1P2	DCBLD1	CCACCTTGTTGGCCGCGCTCGTCCGCAGAGGGTTTAAGAGCTAAGCTG	GCCGCGCTCGTCCGCAGAGG
DCBLD1_-_117803908.23-P1P2	DCBLD1	CCACCTTGTTGGCGGCTCGGGATCCGTCGAGGTTTAAGAGCTAAGCTG	GCGGCTCGGGATCCGTCGAG
DCBLD1_+_117803898.23-P1P2	DCBLD1	CCACCTTGTTGGAAGCTCGGCCTCCCCTCGAGTTTAAGAGCTAAGCTG	GAAGCTCGGCCTCCCCTCGA
DCBLD2_-_98620487.23-P1P2	DCBLD2	CCACCTTGTTGGCGCGCCGCGCTCCTCACCAGTTTAAGAGCTAAGCTG	GCGCGCCGCGCTCCTCACCA
DCBLD2_+_98620477.23-P1P2	DCBLD2	CCACCTTGTTGGGCGAGCGGCGACCCTGGTGGTTTAAGAGCTAAGCTG	GGCGAGCGGCGACCCTGGTG
DCBLD2_-_98620257.23-P1P2	DCBLD2	CCACCTTGTTGGGCACCCGACCAGGAGACGGGTTTAAGAGCTAAGCTG	GGCACCCGACCAGGAGACGG
DCBLD2_-_98620278.23-P1P2	DCBLD2	CCACCTTGTTGGGCAGCGGCGGGAGAACAAGGTTTAAGAGCTAAGCTG	GGCAGCGGCGGGAGAACAAG
DCBLD2_+_98620482.23-P1P2	DCBLD2	CCACCTTGTTGGGCGCGGCGAGCGGCGACCCGTTTAAGAGCTAAGCTG	GGCGCGGCGAGCGGCGACCC
DCC_-_49867002.23-P1P2	DCC	CCACCTTGTTGGGAAGGCAGCAGAGGCGCAGGTTTAAGAGCTAAGCTG	GGAAGGCAGCAGAGGCGCAG
DCC_+_49866584.23-P1P2	DCC	CCACCTTGTTGGGCGCTCTCACTTGTTACTGGTTTAAGAGCTAAGCTG	GGCGCTCTCACTTGTTACTG
DCC_-_49866985.23-P1P2	DCC	CCACCTTGTTGGACAAGGAAAAAGGCTTCGAGTTTAAGAGCTAAGCTG	GACAAGGAAAAAGGCTTCGA
DCC_+_49866782.23-P1P2	DCC	CCACCTTGTTGGACATCCAGGAGGGACCAAGGTTTAAGAGCTAAGCTG	GACATCCAGGAGGGACCAAG
DCC_+_49866571.23-P1P2	DCC	CCACCTTGTTGGTTACTGGGGTGTCCGCCAGGTTTAAGAGCTAAGCTG	GTTACTGGGGTGTCCGCCAG
DCHS1_+_6676980.23-P1P2	DCHS1	CCACCTTGTTGGGGCGGCGCCCGGGCGTCAGGTTTAAGAGCTAAGCTG	GGGCGGCGCCCGGGCGTCAG
DCHS1_+_6676674.23-P1P2	DCHS1	CCACCTTGTTGGTCTGAGCCGGAGACAATGGGTTTAAGAGCTAAGCTG	GTCTGAGCCGGAGACAATGG
DCHS1_+_6676964.23-P1P2	DCHS1	CCACCTTGTTGGCAGCGGACGGACCGATCGAGTTTAAGAGCTAAGCTG	GCAGCGGACGGACCGATCGA
DCHS1_+_6677017.23-P1P2	DCHS1	CCACCTTGTTGGGCGGAGCTCGCATCCTCGGGTTTAAGAGCTAAGCTG	GGCGGAGCTCGCATCCTCGG
DCHS1_-_6676994.23-P1P2	DCHS1	CCACCTTGTTGGGGTCCGTCCGCTGACGCCCGTTTAAGAGCTAAGCTG	GGGTCCGTCCGCTGACGCCC
DCN_-_91576558.23-P1	DCN	CCACCTTGTTGGTAGGTGCTGCTCTGTGACTGTTTAAGAGCTAAGCTG	GTAGGTGCTGCTCTGTGACT
DCN_-_91576530.23-P1	DCN	CCACCTTGTTGGGTTTGCAGGTGTGGAAAGGGTTTAAGAGCTAAGCTG	GGTTTGCAGGTGTGGAAAGG
DCN_+_91576569.23-P1	DCN	CCACCTTGTTGGTGTGCTATGGAGTAGAAGCGTTTAAGAGCTAAGCTG	GTGTGCTATGGAGTAGAAGC
DCN_-_91576178.23-P1	DCN	CCACCTTGTTGGTATAGAGAGTCATGGTGTTGTTTAAGAGCTAAGCTG	GTATAGAGAGTCATGGTGTT
DCN_-_91576171.23-P1	DCN	CCACCTTGTTGGACATTAATATAGAGAGTCAGTTTAAGAGCTAAGCTG	GACATTAATATAGAGAGTCA
DCN_+_91573190.23-P2	DCN	CCACCTTGTTGGTCTTGCCTGGATGAGCCAGGTTTAAGAGCTAAGCTG	GTCTTGCCTGGATGAGCCAG
DCN_+_91573061.23-P2	DCN	CCACCTTGTTGGgAATGGAGTGACAATGAAAGTTTAAGAGCTAAGCTG	GgAATGGAGTGACAATGAAA
DCN_+_91572876.23-P2	DCN	CCACCTTGTTGGggaagatggactgaaatagGTTTAAGAGCTAAGCTG	Gggaagatggactgaaatag
DCN_+_91573238.23-P2	DCN	CCACCTTGTTGGaggtaagagcaacgtgcttGTTTAAGAGCTAAGCTG	Gaggtaagagcaacgtgctt
DCN_+_91573121.23-P2	DCN	CCACCTTGTTGGgcaaggtcggtattctacaGTTTAAGAGCTAAGCTG	Ggcaaggtcggtattctaca
DDR1_-_30852454.23-P1	DDR1	CCACCTTGTTGGAGAGGCCCCGCTCCCGGGTGTTTAAGAGCTAAGCTG	GAGAGGCCCCGCTCCCGGGT
DDR1_+_30852305.23-P1	DDR1	CCACCTTGTTGGAGCTGTCGGGGGCCTGTTCGTTTAAGAGCTAAGCTG	GAGCTGTCGGGGGCCTGTTC
DDR1_+_30852315.23-P1	DDR1	CCACCTTGTTGGTCCCGAGAGCAGCTGTCGGGTTTAAGAGCTAAGCTG	GTCCCGAGAGCAGCTGTCGG
DDR1_-_30852492.23-P1	DDR1	CCACCTTGTTGGGGAAGAGCGATGAGAGGTAGTTTAAGAGCTAAGCTG	GGGAAGAGCGATGAGAGGTA
DDR1_+_30852745.23-P1	DDR1	CCACCTTGTTGGTCCTCCGCACTGAGTGAGAGTTTAAGAGCTAAGCTG	GTCCTCCGCACTGAGTGAGA
DDR1_+_30850899.23-P2	DDR1	CCACCTTGTTGGGAAAGGCCGAGGCACACATGTTTAAGAGCTAAGCTG	GGAAAGGCCGAGGCACACAT
DDR1_-_30850759.23-P2	DDR1	CCACCTTGTTGGCCAGCTGCTGTTCTCTGGAGTTTAAGAGCTAAGCTG	GCCAGCTGCTGTTCTCTGGA
DDR1_+_30850728.23-P2	DDR1	CCACCTTGTTGGAACAGCAGCTGGGGAATCTGTTTAAGAGCTAAGCTG	GAACAGCAGCTGGGGAATCT
DDR1_+_30851171.23-P2	DDR1	CCACCTTGTTGGGGACAGAACAGCTTGTGGTGTTTAAGAGCTAAGCTG	GGGACAGAACAGCTTGTGGT
DDR1_-_30850727.23-P2	DDR1	CCACCTTGTTGGCCCCAGTCCAGCGTCTCCTGTTTAAGAGCTAAGCTG	GCCCCAGTCCAGCGTCTCCT
DDR2_+_162602290.23-P1P2	DDR2	CCACCTTGTTGGTGCTGGTGAAGGAGCCCGGGTTTAAGAGCTAAGCTG	GTGCTGGTGAAGGAGCCCGG
DDR2_+_162602272.23-P1P2	DDR2	CCACCTTGTTGGGTGGTAGGCATACATCCACGTTTAAGAGCTAAGCTG	GGTGGTAGGCATACATCCAC
DDR2_+_162602286.23-P1P2	DDR2	CCACCTTGTTGGGGTGAAGGAGCCCGGTGGTGTTTAAGAGCTAAGCTG	GGGTGAAGGAGCCCGGTGGT
DDR2_-_162602245.23-P1P2	DDR2	CCACCTTGTTGGCAGGAATCCTCAGAATGTGGTTTAAGAGCTAAGCTG	GCAGGAATCCTCAGAATGTG
DDR2_+_162602592.23-P1P2	DDR2	CCACCTTGTTGGTCCAGACCCCCAAAAACATGTTTAAGAGCTAAGCTG	GTCCAGACCCCCAAAAACAT
DGCR2_-_19109886.23-P1P2	DGCR2	CCACCTTGTTGGGCGGGCTGGCGCACACTCTGTTTAAGAGCTAAGCTG	GGCGGGCTGGCGCACACTCT
DGCR2_+_19109902.23-P1P2	DGCR2	CCACCTTGTTGGTCTTGCGCGCAGCTGGAGTGTTTAAGAGCTAAGCTG	GTCTTGCGCGCAGCTGGAGT
DGCR2_+_19109460.23-P1P2	DGCR2	CCACCTTGTTGGCGCCTGCTGGAGCTTACCTGTTTAAGAGCTAAGCTG	GCGCCTGCTGGAGCTTACCT
DGCR2_-_19109823.23-P1P2	DGCR2	CCACCTTGTTGGGTCAGGCGGAGCTGAACCTGTTTAAGAGCTAAGCTG	GGTCAGGCGGAGCTGAACCT
DGCR2_+_19109930.23-P1P2	DGCR2	CCACCTTGTTGGggcgcggagccgagcaggaGTTTAAGAGCTAAGCTG	Gggcgcggagccgagcagga
DLK1_+_101193618.23-P1P2	DLK1	CCACCTTGTTGGCATGCGAGCGTGGTgggtaGTTTAAGAGCTAAGCTG	GCATGCGAGCGTGGTgggta
DLK1_-_101193211.23-P1P2	DLK1	CCACCTTGTTGGggaggcggtacgaaaagggGTTTAAGAGCTAAGCTG	Gggaggcggtacgaaaaggg
DLK1_-_101193658.23-P1P2	DLK1	CCACCTTGTTGGATGCCAAGGCCCGTCCCAGGTTTAAGAGCTAAGCTG	GATGCCAAGGCCCGTCCCAG
DLK1_-_101193510.23-P1P2	DLK1	CCACCTTGTTGGCCGGCTCGCGCCCCCTCTGGTTTAAGAGCTAAGCTG	GCCGGCTCGCGCCCCCTCTG
DLK1_+_101193623.23-P1P2	DLK1	CCACCTTGTTGGCTTGGCATGCGAGCGTGGTGTTTAAGAGCTAAGCTG	GCTTGGCATGCGAGCGTGGT
DLK2_-_43423289.23-P1P2	DLK2	CCACCTTGTTGGCCGAGCGCTCGGGAATCTGGTTTAAGAGCTAAGCTG	GCCGAGCGCTCGGGAATCTG
DLK2_-_43422901.23-P1P2	DLK2	CCACCTTGTTGGGATCGTAGTCAGGACGGAGGTTTAAGAGCTAAGCTG	GGATCGTAGTCAGGACGGAG
DLK2_-_43422869.23-P1P2	DLK2	CCACCTTGTTGGGCGAGGCCAGGCGCGGGAAGTTTAAGAGCTAAGCTG	GGCGAGGCCAGGCGCGGGAA
DLK2_+_43423221.23-P1P2	DLK2	CCACCTTGTTGGCGGCCCCGCGGCCAGCTAGGTTTAAGAGCTAAGCTG	GCGGCCCCGCGGCCAGCTAG
DLK2_-_43423312.23-P1P2	DLK2	CCACCTTGTTGGTCCAGGCGACCCCGAGCGGGTTTAAGAGCTAAGCTG	GTCCAGGCGACCCCGAGCGG
DLL1_+_170599973.23-P1P2	DLL1	CCACCTTGTTGGGGAGACCCGACCCGGCCGAGTTTAAGAGCTAAGCTG	GGGAGACCCGACCCGGCCGA
DLL1_-_170599917.23-P1P2	DLL1	CCACCTTGTTGGCACACGCGCAGGACCGGAGGTTTAAGAGCTAAGCTG	GCACACGCGCAGGACCGGAG
DLL1_-_170599590.23-P1P2	DLL1	CCACCTTGTTGGGCTTCTTCGCAGgagagggGTTTAAGAGCTAAGCTG	GGCTTCTTCGCAGgagaggg
DLL1_-_170599698.23-P1P2	DLL1	CCACCTTGTTGGCGCGGTCTGGAAATCCCACGTTTAAGAGCTAAGCTG	GCGCGGTCTGGAAATCCCAC
DLL1_-_170599801.23-P1P2	DLL1	CCACCTTGTTGGGCGGCCCGGTGTCACTCGGGTTTAAGAGCTAAGCTG	GGCGGCCCGGTGTCACTCGG
DLL3_+_39990056.23-P1P2	DLL3	CCACCTTGTTGGCGTCGGGCAGTGGGAGATCGTTTAAGAGCTAAGCTG	GCGTCGGGCAGTGGGAGATC
DLL3_+_39989623.23-P1P2	DLL3	CCACCTTGTTGGAGAGGAGCCCGGACATCCGGTTTAAGAGCTAAGCTG	GAGAGGAGCCCGGACATCCG
DLL3_+_39989645.23-P1P2	DLL3	CCACCTTGTTGGAGCGCTAGGATCACAGTCTGTTTAAGAGCTAAGCTG	GAGCGCTAGGATCACAGTCT
DLL3_+_39990071.23-P1P2	DLL3	CCACCTTGTTGGGCACCTGCAAGAGGCCGTCGTTTAAGAGCTAAGCTG	GGCACCTGCAAGAGGCCGTC
DLL3_+_39989822.23-P1P2	DLL3	CCACCTTGTTGGCAGCGGGCCGTGTCTGGGAGTTTAAGAGCTAAGCTG	GCAGCGGGCCGTGTCTGGGA
DLL4_+_41221594.23-P1P2	DLL4	CCACCTTGTTGGGCCGGTGTACGCTGCACCAGTTTAAGAGCTAAGCTG	GGCCGGTGTACGCTGCACCA
DLL4_-_41221614.23-P1P2	DLL4	CCACCTTGTTGGGCCTTGGTGCAGCGTACACGTTTAAGAGCTAAGCTG	GGCCTTGGTGCAGCGTACAC
DLL4_-_41221544.23-P1P2	DLL4	CCACCTTGTTGGAGCGCGCAGGTTTCAGTAGGTTTAAGAGCTAAGCTG	GAGCGCGCAGGTTTCAGTAG
DLL4_+_41221585.23-P1P2	DLL4	CCACCTTGTTGGCGCTGCACCAAGGCGGCTGGTTTAAGAGCTAAGCTG	GCGCTGCACCAAGGCGGCTG
[truncated: 6,876 more rows]
