# Supplementary material for: Targeting RAS-driven human cancer cells with antibodies to upregulated and essential cell-surface proteins
Source: eLife. 2018 Jan 23;7:e31098. doi: 10.7554/eLife.31098 (PMC5796798; doi:10.7554/eLife.31098)
Supplement: Supplementary file 7. [file elife-31098-supp7.xls]

## Sheet: Supplementary file 7
	MCF10A KRASG12V (Minus Growth Factors)		MCF10A Empty Vector (Plus Growth Factors)		MCF10A KRASG12V (Plus Growth Factors)
Gene	Growth phenotype (mean of top 3 gammas)	p-value	Growth phenotype (mean of top 3 gammas)	p-value	Growth phenotype (mean of top 3 gammas)	p-value
ACAN	1.36667	0.021135	-0.0217957	0.465462	-0.102386	0.392872
ACPT	-1.07246	0.221814	-0.23958	0.463539	0.320305	0.0824549
ACVR1	0.15785	0.738986	-0.142271	0.362434	-0.295248	0.190002
ACVR1B	-0.283531	0.205461	-0.132943	0.640876	-0.175127	0.339495
ACVR1C	-0.198228	0.161686	-0.32161	0.00719281	-0.361745	0.00271075
ACVR2A	0.113428	0.640876	-0.372416	0.0136764	-0.0936447	0.705711
ACVR2B	-0.0329956	0.772757	0.226495	0.339495	-0.034305	0.221814
ACVRL1	-0.661186	0.0154683	-0.330796	0.296478	-0.57776	0.0719776
ADAM10	-1.87601	0.772757	-1.09645	0.114766	-0.733484	0.67299
ADAM11	-0.365446	0.091742	-0.449736	0.38632	-0.125857	0.378376
ADAM12	0.222648	0.465462	-0.183693	0.491072	-0.0796834	0.36106
ADAM17	-0.266013	0.640876	0.186682	0.67299	-0.272544	0.463539
ADAM18	-0.343779	0.820801	-1.04416	0.0106339	-0.114922	0.976496
ADAM19	0.0112325	0.946869	0.360808	0.738986	0.542657	0.0388458
ADAM2	-0.174587	0.529212	-0.595389	0.0388458	0.00579003	0.939813
ADAM20	0.0677993	0.939813	0.0680369	0.705711	0.0472832	0.743525
ADAM21	-0.193511	0.25727	-0.106195	0.911564	0.0742547	0.67299
ADAM22	0.470781	0.351735	-0.181334	0.38632	-0.108347	0.738986
ADAM23	-0.474618	0.161686	0.118135	0.982278	0.135026	0.31751
ADAM28	-0.389385	0.979921	0.392487	0.0154683	-0.0320617	0.820801
ADAM29	0.116206	0.946869	0.0818249	0.738986	0.0654108	0.67299
ADAM30	0.0266889	0.820801	0.0262971	0.435262	-0.200353	0.326314
ADAM32	0.241103	0.190002	-0.0256885	0.911564	0.16984	0.911564
ADAM33	-0.0906221	0.841545	0.0433672	0.738986	0.334375	0.175418
ADAM7	-0.418711	0.38632	0.198804	0.0590109	-0.0847909	0.841545
ADAM8	0.835435	0.205461	0.40388	0.114766	0.0880565	0.257392
ADAM9	-0.187287	0.279146	0.075722	0.436889	0.275587	0.236844
ADAMTS1	-1.66055	0.0154683	0.218591	0.296478	-0.355388	0.0661671
ADAMTS10	-1.10098	0.2764	0.168652	0.982278	-0.00377643	0.296478
ADAMTS12	-0.0229801	0.738986	0.0057865	0.738986	0.2119	0.60942
ADAMTS14	-1.09716	0.0792878	-0.295627	0.0652289	-0.0462193	0.548671
ADAMTS15	-0.105838	0.491072	-0.049679	0.436889	0.0303173	0.982278
ADAMTS16	-1.17289	0.302118	-0.325797	0.239078	-0.356078	0.137562
ADAMTS17	0.360087	0.463539	0.0242161	0.982278	-0.0591751	0.640876
ADAMTS18	-0.850208	0.00608158	-0.0407144	0.578671	-0.0137544	0.836604
ADAMTS19	0.233412	0.302118	-0.160743	0.378376	0.114749	0.351735
ADAMTS2	0.202201	0.790882	0.0114785	0.911564	0.00704634	0.836604
ADAMTS20	-0.352889	0.217483	0.0665031	0.548671	0.175917	0.67299
ADAMTS3	0.390869	0.820801	0.0219667	0.946869	-0.276489	0.205461
ADAMTS4	-0.103981	0.411143	0.208154	0.205461	0.161909	0.982278
ADAMTS5	-0.0097678	0.548671	-0.195497	0.104899	0.129035	0.463539
ADAMTS6	-0.462285	0.436889	-0.162305	0.161686	0.0348654	0.548671
ADAMTS7	-0.409014	0.0930783	-0.119297	0.67299	0.3732	0.0192499
ADAMTS8	-0.217198	0.257392	-0.632561	0.0480457	0.00969754	0.632509
ADAMTS9	-0.000304937	0.790882	0.23966	0.302118	-0.104632	0.461384
ADAMTSL1	0.128291	0.946869	0.0783737	0.705711	-0.0172326	0.946869
ADAMTSL3	0.204769	0.979921	-0.273398	0.112829	0.417414	0.151402
ADAMTSL4	-0.440795	0.166129	-0.304782	0.124718	-0.271812	0.217483
ADCYAP1R1	0.207235	0.705711	-0.0599951	0.0957172	-0.0269872	0.876434
AGER	-0.438455	0.946869	-0.148616	0.60942	-0.178092	0.772757
AGRN	-0.332084	0.136678	0.0113069	0.436889	0.127838	0.640876
AKT1	-0.473547	0.182229	0.0490982	0.640876	0.043881	0.743525
AKT2	-0.101971	0.738986	-0.369021	0.175418	0.228021	0.640876
AKT3	0.145767	0.738986	0.224149	0.25727	0.163211	0.705711
ALCAM	-0.326671	0.166129	0.365566	0.00820885	0.355571	0.0739451
ALK	0.483557	0.668752	0.126819	0.806964	-0.174206	0.257392
ALPI	-0.440903	0.236844	-0.0814196	0.25727	0.172521	0.236844
ALPL	0.528755	0.137562	-0.0534424	0.362434	0.246815	0.411143
ALPP	-0.222621	0.738986	0.0138193	0.876434	-0.0609486	0.911564
ALPPL2	0.491743	0.175418	0.290684	0.0278712	0.488425	0.436889
AMBN	-0.445062	0.279146	0.306182	0.0432394	0.298364	0.091742
AMELX	-0.126323	0.705711	-0.148064	0.114766	0.0624935	0.60942
AMELY	-0.447703	0.60942	-0.161563	0.25727	-0.544638	0.519459
AMHR2	-0.940151	0.161686	-0.194626	0.104899	0.111968	0.175418
AMIGO1	-0.131312	0.640876	-0.12805	0.548671	-0.034144	0.876434
AMIGO2	-0.125322	0.25727	-0.244435	0.239078	-0.258876	0.221814
AMIGO3	-2.07454	0.00234083	-1.66706	0.000677313	-1.68525	0.091742
AMN	-0.159278	0.529212	0.178698	0.151402	0.417494	0.091742
AMY2A	0.257672	0.806964	0.264773	0.982278	-0.191845	0.436889
ANG	-0.246128	0.548671	-0.012879	0.491072	0.247132	0.25727
ANTXR1	-0.0457539	0.899857	-0.149312	0.411143	-0.214766	0.339495
ANTXR2	-0.614716	0.25727	-0.247928	0.806964	-0.0983041	0.548671
AOC1	0.0465764	0.578671	-0.0948447	0.519459	0.450579	0.114766
AOC2	-0.194819	0.60942	0.0568115	0.25727	0.256438	0.38632
APCDD1	0.0485876	0.860154	-0.0754678	0.632509	-0.0558213	0.668752
APCDD1L	-0.113318	0.60942	-0.0459765	0.60942	0.484047	0.239078
APLP1	-0.268221	0.217483	-0.14303	0.239078	0.128533	0.738986
APLP2	-0.816015	0.0590761	-0.10155	0.38632	-0.729961	0.112829
APOO	-0.143954	0.790882	-0.368555	0.578671	-0.276783	0.392872
APP	0.270856	0.519459	-0.163867	0.190002	-0.448144	0.0136764
ARAF	0.425141	0.640876	0.449471	0.31751	-0.0737934	0.362434
AREG	0.191973	0.632509	0.0282761	0.640876	0.00467365	0.979921
ART3	-0.863798	0.2764	0.0141698	0.362434	0.111884	0.772757
ART4	-0.296056	0.899857	0.417736	0.161686	0.0290004	0.781894
ASPN	-0.23442	0.435262	-0.19626	0.114766	0.181702	0.436889
ASTN1	-0.098589	0.640876	-0.192791	0.0957172	-0.0526442	0.60942
ASTN2	0.222339	0.205461	-0.362301	0.0871906	-0.0365654	0.436889
ATP6AP2	-1.04053	0.00361528	-1.38827	0.000796019	-1.61209	0.000677313
ATRN	-0.25472	0.14883	0.108146	0.979921	0.153973	0.461384
ATRNL1	-0.0911054	0.578671	-0.000524384	0.190002	-0.110607	0.820801
AXL	-0.621328	0.114766	-0.458185	0.00149079	0.112927	0.548671
BACE1	-0.350618	0.227057	0.391024	0.279146	0.0193571	0.836604
BACE2	0.167724	0.781894	0.2328	0.0278712	0.0822796	0.705711
BAI1	-0.781819	0.946869	0.0638622	0.25727	-0.170272	0.411143
BAI2	0.347875	0.362434	-0.132379	0.296478	0.120863	0.640876
BAI3	-0.0178278	0.701708	0.607726	0.124718	0.183531	0.275659
BAMBI	-2.46701	0.0367101	-1.00966	0.436889	-1.48187	0.31751
BCAM	0.057662	0.979921	-0.263985	0.0480457	0.0236275	0.911564
BCAN	-0.572475	0.0871906	-0.406314	0.205461	0.299748	0.175418
BGN	0.234467	0.575621	-0.261192	0.899857	0.088866	0.597128
BMP4	-0.743228	0.0174636	-0.381622	0.0221406	-0.224912	0.436889
BMPR1A	0.321078	0.578671	0.0787935	0.221814	0.193018	0.091742
BMPR1B	0.340817	0.841545	0.0992222	0.205461	-0.0577877	0.2764
BMPR2	-0.598265	0.296478	-0.00216602	0.876434	0.12601	0.436889
BOC	-0.392823	0.461384	0.39777	0.00935146	0.710873	0.0127145
BRAF	-0.214055	0.435262	-0.29614	0.136678	-0.272616	0.257392
BSG	-1.70684	0.00139163	-0.842414	0.000412616	-0.640548	0.0271254
BST1	-0.80018	0.182229	-0.14081	0.239078	0.120423	0.406225
BTC	0.154481	0.38632	-0.106111	0.841545	0.363301	0.00719281
BTD	-1.12857	0.0388458	-0.323428	0.161686	-0.283852	0.841545
BTLA	-0.0424495	0.946869	0.194659	0.548671	0.526291	0.0871906
BTN1A1	0.0407607	0.658531	-0.00950785	0.436889	-0.521089	0.38632
BTN2A1	0.436897	0.136678	-0.145251	0.239078	0.0172378	0.946869
BTN2A2	-0.265628	0.436889	-0.101282	0.578671	0.146923	0.411143
BTN3A1	-0.505387	0.0871906	0.00220854	0.60942	-0.268095	0.114766
BTN3A2	-0.859785	0.239078	-0.193512	0.0871906	0.218463	0.67299
BTN3A3	-0.348309	0.199287	0.458888	0.136678	-0.2239	0.326314
BTNL3	0.379994	0.496792	-0.103227	0.562675	0.0353523	0.860154
BTNL8	0.201765	0.772757	0.0946413	0.362434	0.321301	0.00935146
BTNL9	-0.258674	0.411143	0.62204	0.000933795	0.20382	0.105135
C10orf128	-0.266507	0.979921	0.297303	0.491072	0.219677	0.362434
C10orf54	-0.35307	0.339495	0.233221	0.362434	0.436134	0.0120704
C11orf24	-0.178967	0.67299	0.0387091	0.640876	0.0495652	0.463539
C11orf34	0.000771107	0.982278	0.0458304	0.548671	0.0999208	0.860154
C11orf87	-0.234682	0.166129	-0.248909	0.0232906	-0.070528	0.536102
C14orf37	-0.299052	0.302448	-0.250996	0.112829	-0.160147	0.166129
C16orf91	-1.0812	0.362434	0.315768	0.640876	0.169322	0.738986
C19orf18	0.276192	0.463539	-0.0941734	0.296478	0.212012	0.491072
C19orf24	-1.13633	0.190002	-0.173903	0.0792878	-0.0614385	0.463539
C19orf38	-0.268717	0.257392	-0.0536893	0.378376	-0.0302166	0.899857
C19orf77	-0.0207361	0.31751	-0.101152	0.946869	-0.121485	0.860154
C1orf101	-0.421193	0.0824549	-1.30176	0.0174636	0.0927919	0.705783
C1orf159	-0.385807	0.221814	-0.377224	0.436889	-0.620715	0.0719776
C1orf233	0.100846	0.982278	-0.0698446	0.806964	0.14607	0.236844
C2orf82	-0.693732	0.00608158	-0.148672	0.0532931	0.487455	0.0532931
C3orf80	-0.267581	0.199287	0.207242	0.519459	-0.0656806	0.411143
C5orf15	-0.1067	0.836604	0.088556	0.378376	0.133307	0.946869
C6orf15	-0.0362839	0.841545	-0.471055	0.0120704	-0.307134	0.876434
CA12	-0.131329	0.982278	0.049716	0.463539	-0.225172	0.104899
CA14	-0.196741	0.339495	-0.49225	0.0248632	-0.279807	0.548671
CA4	-0.246377	0.406225	-1.96367	0.00416368	0.0709623	0.529212
CACHD1	-0.20215	0.982278	-0.199466	0.548671	0.0112453	0.738986
CACNA2D1	0.156117	0.979921	0.030455	0.982278	-0.000280384	0.939813
CACNA2D2	-0.0358192	0.939813	0.050462	0.632509	0.147769	0.236844
CACNA2D3	0.420209	0.182229	-0.265539	0.0174636	-0.0376981	0.772757
CACNA2D4	-0.0520561	0.738986	-0.0619874	0.772757	0.306694	0.221814
CADM1	-0.178271	0.302118	-0.321031	0.0480457	-0.2857	0.362434
CADM2	0.331026	0.841545	0.0793886	0.946869	-0.300449	0.205461
CADM4	-0.454514	0.0532931	-0.228491	0.2764	0.109844	0.38632
CALCR	-0.278206	0.772757	0.205213	0.578671	-0.0876004	0.876434
CALCRL	-0.713955	0.0248632	-0.0102829	0.982278	-0.234095	0.31751
CASD1	-1.03926	0.175418	-1.01023	0.0136764	-1.08262	0.2764
CASR	-0.186158	0.820801	0.364708	0.136678	0.133106	0.326314
CATSPERG	-0.912431	0.0136764	-0.0804661	0.221814	0.167425	0.463539
CCDC107	-0.733966	0.0634314	-0.354004	0.00873673	-0.0818913	0.496792
CCDC47	-0.272937	0.221814	-0.500652	0.0652289	-0.159517	0.67299
CCDC80	-0.152568	0.67299	0.0430106	0.738986	-0.0477055	0.982278
CCR7	-0.594733	0.0532931	-0.266062	0.114766	-0.270083	0.0526277
CD101	-0.508577	0.205461	0.022145	0.946869	0.0179393	0.911564
CD109	-0.868981	0.0285499	0.184907	0.166279	0.245114	0.378376
CD14	0.0518204	0.772757	-0.381993	0.161686	0.089353	0.2764
CD160	-0.0364116	0.860154	0.000865348	0.982278	-0.0309728	0.738986
CD163L1	-0.095877	0.701708	-0.360598	0.640876	-0.730906	0.668752
CD164L2	-0.688061	0.25727	0.292315	0.436889	0.37211	0.0792878
CD177	-0.35719	0.806964	-0.110695	0.296478	-0.004258	0.982278
CD180	0.402557	0.436889	0.0500702	0.841545	0.455015	0.0174636
CD19	-0.741395	0.148781	-0.0623843	0.38632	0.149714	0.491072
CD1A	-0.142784	0.296478	-0.299823	0.136678	-0.136002	0.519459
CD1B	-0.0860678	0.436889	0.173495	0.190002	0.207342	0.239078
CD1C	0.145069	0.911564	-0.106559	0.806964	0.0157111	0.911564
CD1D	-0.0275944	0.806964	0.312529	0.296478	0.0586383	0.578671
CD2	0.376383	0.463539	-0.0904066	0.362434	0.17126	0.38632
CD200	0.533182	0.0278712	-0.111717	0.578671	0.0362442	0.60942
CD200R1	-0.0738808	0.668752	-0.0889174	0.279146	0.0890583	0.781894
CD200R1L	-0.111502	0.640876	0.119187	0.806964	0.272479	0.205461
CD22	-1.86995	0.091742	-0.898619	0.491072	-0.977136	0.465462
CD226	-0.081032	0.491072	0.0121749	0.982278	-0.00827082	0.982278
CD24	-0.178606	0.436889	-0.137014	0.982278	0.256018	0.0652289
CD244	0.10259	0.946869	0.0120467	0.578671	0.373516	0.175418
CD247	-0.199103	0.362434	-0.093999	0.982278	-0.111105	0.772757
CD248	-0.278137	0.217483	-0.00762201	0.296478	-0.221578	0.0480457
CD27	0.113364	0.911564	0.0624527	0.519459	-0.0775037	0.491072
CD274	-0.278275	0.806964	-0.0271621	0.31751	-0.0346061	0.362434
CD276	-0.483827	0.175418	-0.204203	0.221814	-0.112262	0.491072
CD28	-0.0106968	0.979921	-0.0130191	0.705711	0.157177	0.705711
CD300A	-0.0955718	0.67299	-0.133389	0.946869	0.0940389	0.339495
CD300C	0.147763	0.982278	0.246624	0.019681	-0.0323896	0.982278
CD300E	-1.09783	0.148781	-0.116856	0.578671	0.052332	0.772757
CD300LB	-0.554456	0.0957172	0.0655665	0.436889	0.14086	0.463539
CD300LD	-0.36654	0.982278	-0.0735695	0.876434	0.0829771	0.519459
CD300LF	0.0832924	0.982278	0.0904948	0.519459	0.148118	0.806964
CD302	-0.775256	0.0146333	-0.0230135	0.911564	-0.306532	0.597128
CD320	0.143676	0.705783	-0.380495	0.0348374	0.158573	0.820801
CD33	-0.350225	0.519459	-0.0767317	0.339495	-0.10809	0.946869
CD34	0.477293	0.411143	-0.0442945	0.411143	0.146693	0.491072
CD3D	-0.51414	0.190002	-0.221614	0.0652289	0.0951646	0.640876
CD3E	0.241584	0.296478	-0.0951677	0.578671	-0.0282166	0.841545
CD3G	-0.0708349	0.806964	-0.15483	0.738986	-0.0747473	0.911564
CD4	-0.195766	0.548671	0.151572	0.114766	0.0790748	0.67299
CD40	0.152079	0.435262	-0.0344144	0.491072	0.114115	0.279146
CD44	-0.181937	0.279146	-0.252083	0.00953254	-0.0387811	0.597128
CD47	0.121302	0.860154	-0.217903	0.519459	0.0546862	0.806964
CD48	-0.389042	0.25727	-0.169613	0.0480457	0.381643	0.0871906
CD5	-0.262004	0.982278	-0.0293696	0.0957172	-0.288265	0.378376
CD52	-0.305441	0.175418	0.00445018	0.876434	-0.133884	0.60942
CD55	-0.288558	0.597128	-0.177637	0.911564	0.221535	0.217483
CD58	-0.892456	0.743525	-0.732397	0.876434	0.1278	0.632509
CD59	0.140014	0.772757	0.191749	0.296478	-0.216935	0.239078
CD6	0.436689	0.841545	-0.0437626	0.548671	0.138797	0.578671
CD68	-0.334818	0.25727	-0.38054	0.205461	-0.0273572	0.876434
CD7	-0.975382	0.00820885	-0.109876	0.175418	0.0647899	0.982278
CD79A	-0.287989	0.124718	0.141709	0.67299	0.182522	0.67299
CD79B	-0.0971549	0.929568	-0.0777688	0.946869	0.682282	0.0168029
CD80	0.204544	0.60942	-0.325737	0.0348374	0.031363	0.806964
CD83	-0.563789	0.0957172	-0.0804359	0.362434	0.11954	0.463539
CD84	-0.0165365	0.876434	-0.422306	0.00935146	-0.152036	0.2764
CD86	-0.18163	0.236844	-0.015276	0.705711	0.072608	0.463539
CD8A	-0.0725425	0.860154	-0.0359072	0.519459	0.0513058	0.658531
CD8B	-0.710255	0.0232906	-0.152511	0.426326	0.113307	0.976496
CD93	-0.400392	0.31751	-0.0425005	0.60942	0.197014	0.31751
CD96	-0.144093	0.982278	-0.0761376	0.772757	-0.0304852	0.876434
CD97	0.140282	0.743525	0.0392336	0.820801	0.0331272	0.705783
CD99	0.0245605	0.976496	-0.141889	0.876434	-0.367588	0.279146
CD99L2	-0.169334	0.275659	-0.774373	0.2764	0.0583025	0.658531
CDCP1	-0.942898	0.0192499	-0.0447788	0.326314	-0.0721397	0.705783
CDH10	-0.133927	0.406225	-0.101565	0.339495	0.336391	0.136678
CDH11	-0.242235	0.275659	-0.0576924	0.411143	0.306234	0.668752
CDH12	0.0586063	0.738986	0.419081	0.0388458	0.109214	0.982278
CDH13	-0.359349	0.38632	-0.140231	0.296478	0.234201	0.411143
CDH15	-0.714209	0.0871906	-0.181852	0.125349	-0.268238	0.0957172
CDH16	0.119777	0.979921	0.0910825	0.860154	0.0904438	0.632509
CDH17	0.0376446	0.640876	0.186868	0.738986	0.36514	0.190002
CDH18	-0.0640427	0.562675	-0.348572	0.463539	0.0572402	0.946869
CDH19	0.150622	0.899857	0.54522	0.0136764	0.158796	0.465462
CDH2	0.672153	0.2764	-0.359662	0.161686	-0.288034	0.161686
CDH20	0.088005	0.939813	-0.00404009	0.911564	-0.325245	0.0661671
CDH22	-1.92686	0.124718	-1.30464	0.435262	-0.507627	0.330915
CDH23	0.11163	0.745869	0.119936	0.705711	0.0162213	0.790882
CDH24	-0.0753679	0.979921	-0.0279374	0.911564	0.0738416	0.836604
CDH26	-0.545367	0.946869	-0.0849535	0.876434	-0.0995989	0.982278
CDH3	-0.0259679	0.806964	-0.244514	0.0957172	0.202301	0.548671
CDH4	0.0483289	0.529212	-0.202745	0.911564	0.111454	0.529212
CDH6	0.0621745	0.616465	-0.216746	0.378376	-0.111521	0.302448
CDH7	-0.789723	0.151402	-0.500075	0.00708094	-0.174828	0.236844
CDH8	0.203446	0.772757	0.274209	0.548671	0.144927	0.463539
CDH9	0.0301152	0.982278	-0.212018	0.982278	0.137047	0.491072
CDHR1	-0.0746059	0.640876	-0.0821109	0.806964	0.0743551	0.841545
CDHR3	-0.0849335	0.562675	0.100926	0.378376	0.337104	0.0414863
CDHR4	-0.0709676	0.982278	0.09912	0.161686	0.194007	0.772757
CDHR5	-0.348595	0.841545	-0.194694	0.60942	0.00758753	0.738986
CDON	-1.70924	0.0652289	-0.418404	0.705711	0.0970809	0.632509
CEACAM1	-1.16412	0.0432394	-0.353039	0.221814	-0.167228	0.136678
CEACAM19	-0.0503436	0.296478	-0.383073	0.0871906	-0.137115	0.578671
CEACAM20	-1.03421	0.00708094	-0.068243	0.0590109	0.0286633	0.911564
CEACAM21	-0.550476	0.137562	-0.0780292	0.114766	-0.149047	0.217483
CEACAM3	-0.402279	0.0480457	-0.42438	0.148781	0.0135336	0.946869
CEACAM4	0.0118024	0.976496	0.0665715	0.279146	0.0604091	0.497997
CEACAM5	0.156064	0.876434	0.307285	0.0480457	0.068292	0.548671
CEACAM6	-0.292697	0.743525	-0.678159	0.0480457	-0.0655287	0.38632
CEACAM7	0.1353	0.436889	-0.272485	0.0278712	0.0897517	0.296478
CEACAM8	-0.42239	0.982278	-0.151861	0.114766	0.105975	0.296478
CELSR1	0.109124	0.841545	0.0912482	0.38632	0.099952	0.463539
CELSR2	0.175406	0.351735	-0.079196	0.0957172	0.272152	0.104899
CELSR3	0.553101	0.136678	0.418284	0.0590109	0.108825	0.806964
CETP	0.122661	0.820801	-0.242199	0.0871906	0.162804	0.199287
CFC1	0.72641	0.0122681	-0.229617	0.0146333	-0.254345	0.0420594
CFI	-0.175252	0.38632	-0.033614	0.772757	0.0366532	0.982278
CHAD	-0.123003	0.411143	-0.596866	0.0432394	-0.366631	0.60942
CHADL	-1.17604	0.781894	-1.14762	0.175418	0.100194	0.632509
CHI3L1	-0.141701	0.578671	-0.145053	0.548671	-0.357488	0.0532931
CHL1	-0.613152	0.0590109	-0.0794515	0.640876	0.268224	0.136678
CILP	0.54366	0.772757	-0.0522693	0.25727	0.352463	0.175418
CILP2	-0.00565537	0.772757	-0.123604	0.982278	0.231471	0.148781
CLCA1	-0.640511	0.339495	0.167171	0.411143	0.0172073	0.60942
CLCA2	-0.376821	0.137562	-0.0485507	0.136678	0.248696	0.0324106
CLCA4	0.247509	0.806964	0.0704437	0.705711	0.006004	0.806964
CLCC1	-0.820565	0.275659	-0.887271	0.101852	-0.766947	0.236844
CLEC14A	0.365156	0.67299	0.11597	0.38632	0.341501	0.0719776
CLSTN2	-0.597075	0.31751	-0.219535	0.946869	0.0343595	0.640876
CLSTN3	-0.16844	0.406225	-0.199675	0.137562	0.128342	0.279146
CNTFR	-0.761756	0.0314933	-0.780263	0.0106339	0.446846	0.101852
CNTN1	0.00228967	0.705711	-0.241654	0.175418	-0.221638	0.362434
CNTN2	-0.372754	0.31751	0.0865513	0.548671	0.0535333	0.60942
CNTN3	-0.546102	0.148781	0.0630254	0.772757	0.371894	0.175418
CNTN4	0.473346	0.161686	-0.321264	0.362434	-0.211572	0.38632
CNTN5	0.538118	0.182229	0.398051	0.2764	0.168189	0.166279
CNTN6	-0.355976	0.465462	-0.227826	0.0220028	0.207021	0.124718
CNTNAP1	0.101187	0.640876	0.0248965	0.67299	-0.203622	0.578671
CNTNAP2	-0.0193032	0.911564	0.00296927	0.979921	-0.199945	0.257392
CNTNAP4	-0.808581	0.019681	0.105886	0.175418	-0.067432	0.465462
CNTNAP5	-0.618481	0.112829	-0.437731	0.00196344	-0.216544	0.091742
COCH	0.00510715	0.548671	-0.130823	0.548671	-0.178109	0.411143
COL10A1	-0.579111	0.496792	-0.180877	0.378376	0.184537	0.781894
COL11A1	-0.240839	0.38632	-0.48217	0.00629112	-0.235579	0.38632
COL11A2	0.453964	0.239078	-0.0137844	0.31751	-0.0445694	0.911564
COL12A1	-0.723723	0.841545	-1.00681	0.114766	-0.709407	0.0652289
COL14A1	-0.0785315	0.597128	-0.505085	0.00935146	-0.126485	0.25727
COL15A1	0.216951	0.578671	0.086477	0.104899	0.23858	0.2764
COL16A1	-0.131749	0.496792	-0.44288	0.0324106	-0.446516	0.279146
COL18A1	0.366262	0.578671	-0.0251445	0.806964	0.153619	0.548671
COL19A1	-0.3503	0.841545	-0.164715	0.148781	0.105602	0.911564
COL1A1	0.135832	0.806964	-0.0542104	0.436889	0.216466	0.463539
COL1A2	-0.0555434	0.982278	-0.271697	0.0957172	0.371268	0.148781
COL20A1	0.227845	0.562675	-0.163153	0.236844	0.283764	0.0220028
COL21A1	-0.204552	0.806964	-0.132235	0.841545	-0.0535345	0.841545
COL22A1	-0.699365	0.0467785	-0.131234	0.772757	0.371028	0.362434
COL24A1	0.285328	0.841545	-0.528858	0.00173593	-0.0686732	0.781894
COL26A1	0.107588	0.548671	0.0636094	0.2764	0.115748	0.190002
COL27A1	-1.32433	0.0661671	0.104992	0.738986	-0.079934	0.60942
COL28A1	-0.0360743	0.640876	-0.0219837	0.463539	0.141869	0.362434
COL2A1	0.190371	0.426326	0.217039	0.705783	0.101173	0.378376
COL3A1	-0.525681	0.0739451	-0.10637	0.705711	-0.108037	0.632509
COL4A1	-0.250097	0.406225	-0.0374552	0.302118	-0.233439	0.124718
COL4A2	0.199252	0.426326	-0.195837	0.640876	-0.0541473	0.575621
COL4A3	-0.26396	0.296478	-0.0682136	0.362434	-0.0971409	0.548671
COL4A4	-0.568648	0.0526277	0.316142	0.114766	-0.227386	0.0467785
COL4A5	0.042145	0.632509	0.278645	0.519459	-0.224305	0.465462
COL4A6	0.246447	0.436889	-0.120504	0.362434	0.179779	0.296478
COL5A1	-1.17154	0.0480457	-0.446931	0.205461	-0.341382	0.137562
COL5A2	0.362114	0.166279	-0.0365533	0.820801	0.142784	0.496792
COL5A3	-1.00992	0.114766	-0.562071	0.0348374	-0.418469	0.668752
COL6A1	0.129899	0.899857	-0.137189	0.738986	-0.0487632	0.616465
COL6A2	0.513863	0.221814	0.0673827	0.175418	0.278653	0.0221406
COL6A3	0.446026	0.296478	0.00820454	0.806964	0.222368	0.982278
COL6A5	0.024258	0.899857	-0.0772278	0.463539	0.0691572	0.705711
COL6A6	0.548387	0.148781	-0.145639	0.0792878	-0.0074721	0.60942
COL7A1	0.0490261	0.860154	-0.54858	0.0652289	-0.239645	0.548671
COL8A1	-0.231597	0.205191	-0.0496203	0.743525	0.413502	0.0739451
COL8A2	-0.917553	0.0174636	-0.191167	0.239078	0.353935	0.0532931
COL9A1	0.172924	0.738986	-0.609626	0.0652289	-0.180595	0.362434
COL9A2	-0.324633	0.31751	-0.252242	0.0871906	0.090162	0.772757
COL9A3	-0.0544742	0.668752	-0.52879	0.362434	-0.249835	0.529212
COMP	-1.72156	0.0824549	-1.61909	0.019681	-1.047	0.279146
CPA6	0.152192	0.946869	0.119576	0.806964	-0.384501	0.772757
CPD	-0.0192663	0.982278	0.138635	0.946869	-0.074517	0.982278
CPM	0.892728	0.104899	0.111602	0.411143	-0.0605986	0.640876
CPN1	-1.16	0.0532931	-0.599659	0.0719776	-0.881931	0.0652289
CPZ	-0.133703	0.668752	-0.742827	0.411143	-0.0940033	0.326314
CR1	0.149432	0.658531	0.231273	0.597128	0.234602	0.199287
CR2	-1.0431	0.114766	-0.616137	0.0480457	-0.780907	0.0248632
CRB2	-0.828346	0.104899	-0.457547	0.00719281	-0.122522	0.491072
CRELD1	0.445649	0.326314	-0.479519	0.436889	0.103732	0.781894
CRHR1	-0.532949	0.578671	-0.430722	0.296478	-0.160779	0.519459
CRHR2	-0.64525	0.182229	0.0386001	0.911564	0.103969	0.435262
CRLF2	-0.0868807	0.911564	-0.082787	0.640876	-0.175504	0.946869
CRTAC1	-0.175487	0.640876	0.04622	0.548671	0.304036	0.31751
CRTAM	0.303946	0.60942	0.0326699	0.982278	0.11718	0.876434
CRTAP	0.131352	0.519459	-0.406747	0.0652289	-0.196391	0.175418
CSF1	-0.333612	0.463539	0.219305	0.136678	0.16802	0.31751
CSF1R	-0.238485	0.125349	-0.267766	0.190002	-0.0558117	0.806964
CSF2RA	-0.79154	0.0480457	0.0703762	0.190002	0.269612	0.640876
CSF2RB	0.051327	0.461384	-0.147298	0.257392	0.164491	0.326314
CSMD1	0.388198	0.279146	0.0214282	0.946869	-0.0211516	0.982278
CSPG5	-0.364779	0.137562	0.0852084	0.529212	-0.00265004	0.860154
CTGF	0.278304	0.705711	0.160026	0.0957172	-0.00383456	0.738986
CTHRC1	0.353493	0.529212	-0.778463	0.578671	-0.0932072	0.217483
CTLA4	-0.0562834	0.406225	0.0809845	0.738986	0.0666625	0.640876
CTRB1	0.00215423	0.575621	0.0155145	0.236844	-0.549531	0.0192499
CTRB2	0.141386	0.882884	-0.496404	0.0192499	0.0817637	0.745869
CX3CL1	-1.5236	0.114766	-0.846826	0.0957172	-1.4583	0.175418
CXADR	-0.400806	0.38632	-0.254611	0.0590109	-0.104096	0.860154
CXCL16	-0.342648	0.326314	-0.114371	0.67299	-0.0470947	0.668752
CXorf66	-0.332388	0.841545	-0.12379	0.463539	0.241392	0.60942
CYYR1	0.11732	0.491072	-0.000670015	0.982278	0.0672516	0.463539
DCBLD1	0.126587	0.701708	0.170297	0.806964	-0.150267	0.772757
DCBLD2	-0.432109	0.112829	-0.220496	0.60942	0.0528259	0.781894
DCC	0.123087	0.911564	0.0952389	0.38632	0.371333	0.125349
DCHS1	-0.354607	0.519459	-0.242784	0.104899	-0.0548671	0.548671
DCN	0.168777	0.705711	-0.136227	0.239078	0.245303	0.236844
DDR1	-0.168571	0.227057	-0.452302	0.0388458	0.135048	0.597128
DDR2	0.266508	0.548671	-0.16683	0.738986	0.111619	0.841545
DGCR2	0.287924	0.67299	-0.172238	0.911564	0.586252	0.0136764
DLK1	-0.410612	0.190002	-0.226104	0.00820885	0.233647	0.738986
DLK2	0.294724	0.946869	-0.267968	0.25727	0.538019	0.136678
DLL1	-0.818949	0.491072	-0.717951	0.0480457	0.278765	0.0634314
DLL3	-0.385417	0.175418	0.162643	0.221814	0.173734	0.38632
DLL4	-0.273902	0.236844	-0.268366	0.166279	-0.142658	0.562675
DNAJC16	-0.279777	0.632509	0.235953	0.982278	0.227619	0.339495
DNER	-0.302065	0.31751	-0.321386	0.0590109	-0.329252	0.0388458
DPCR1	0.247567	0.738986	-0.246782	0.578671	-0.288206	0.38632
DPEP2	-1.34478	0.114766	-0.363569	0.019681	-0.124817	0.2764
DPEP3	0.478372	0.151402	-0.312269	0.0127145	0.149072	0.217483
DPT	-0.504244	0.435262	-0.167594	0.257392	0.398343	0.465462
DSC1	-0.0582174	0.705783	-0.483156	0.148781	0.171263	0.2764
DSC2	-1.00904	0.0480457	-0.0810333	0.705711	-0.147245	0.296478
DSC3	0.38042	0.302118	0.272339	0.38632	0.351551	0.0532931
DSCAM	-0.0311981	0.668752	-0.00859537	0.860154	-0.0493752	0.743525
DSCAML1	-0.403687	0.0792878	-0.189181	0.161686	-0.238787	0.0590109
DSE	-0.038159	0.705783	-0.35698	0.00234083	0.256494	0.0871906
DSEL	-0.406743	0.137562	-0.503936	0.296478	-0.0905317	0.411143
DSG1	-0.921383	0.00820885	-0.181737	0.982278	-0.0747433	0.578671
DSG2	-0.121453	0.491072	-0.622748	0.0221406	-0.047298	0.491072
DSG3	-0.68853	0.221814	-0.235179	0.60942	-0.4901	0.362434
DSG4	-0.168104	0.911564	-0.134206	0.738986	0.0278372	0.67299
DSPP	-0.390543	0.205461	0.0383376	0.519459	0.0603733	0.705711
ECM1	0.035755	0.743525	-0.0426766	0.257392	0.180305	0.860154
ECM2	-0.096351	0.67299	-0.306445	0.00629112	0.155822	0.296478
ECSCR	-1.20043	0.0168029	-0.139123	0.435262	0.112572	0.392872
EDAR	-0.267118	0.161686	-0.38825	0.00629112	-0.0637361	0.640876
EDNRA	0.349381	0.982278	-0.100772	0.25727	0.0499815	0.806964
EDNRB	-0.659702	0.279146	-0.352679	0.0957172	-0.0420297	0.876434
EFEMP1	-2.0001	0.00708094	-0.338819	0.806964	-0.482171	0.406225
EFNA1	-0.254095	0.279146	-0.383097	0.161686	-0.213492	0.562675
EFNA2	-0.23586	0.60942	-0.168677	0.578671	-0.0932487	0.67299
EFNA3	-0.873042	0.0348374	-0.238465	0.0221406	-0.438566	0.339495
EFNA4	-0.120242	0.25727	0.0765828	0.67299	-0.0179173	0.982278
EFNA5	-0.00827579	0.597128	0.0699661	0.175418	-0.178709	0.463539
EFNB1	-0.167584	0.175418	-0.299296	0.161686	-0.152704	0.362434
EFNB2	-0.237162	0.436889	0.126289	0.436889	0.188228	0.205461
EFNB3	-0.523532	0.0871906	-0.923323	0.0136764	-0.150414	0.67299
EGF	-0.448696	0.148781	-0.218581	0.519459	0.243172	0.217483
EGFL6	-1.04227	0.0590761	-0.441071	0.025092	0.0490245	0.668752
EGFLAM	0.00607458	0.939813	0.0953421	0.491072	0.0732493	0.406225
EGFR	0.0973892	0.882884	-1.4119	0.00196344	-0.187961	0.392872
ELFN1	0.365684	0.151402	-0.139192	0.221814	0.46911	0.0432394
ELFN2	-0.240022	0.548671	-0.14861	0.411143	-0.0185761	0.772757
ELN	-1.3034	0.911564	-1.55833	0.491072	-1.57825	0.0590109
ELTD1	-0.529689	0.0871906	0.273515	0.463539	0.00027558	0.772757
EMB	-1.74674	0.0192499	-0.929866	0.221814	-1.30347	0.0012779
EMC1	-1.26496	0.0047865	-0.968127	0.190002	-0.941118	0.0348374
EMC10	0.0205836	0.339495	-0.0529474	0.946869	0.0058144	0.946869
EMC7	-0.319852	0.182229	-0.414693	0.205461	-0.057217	0.806964
EMCN	-0.458315	0.0652289	-0.0721766	0.362434	0.228967	0.411143
EMID1	-0.333647	0.411143	-0.0354974	0.362434	0.0370884	0.31751
EMILIN1	-0.696005	0.67299	-0.146382	0.491072	-0.17568	0.911564
EMILIN2	0.310773	0.705783	-0.000692532	0.351735	-0.0131362	0.899857
EMILIN3	-1.43242	0.00822535	-0.132922	0.217483	-0.0538065	0.860154
EMR1	0.409199	0.151402	0.241781	0.67299	-0.0900616	0.426326
EMR2	-0.9144	0.0824549	-0.227607	0.00820885	0.0816655	0.562675
EMR3	-0.0320773	0.67299	-0.351237	0.00629112	-0.0375946	0.491072
ENAM	-0.210422	0.946869	-0.399215	0.161686	-0.234667	0.806964
ENG	-0.699747	0.112829	0.240519	0.101852	0.46987	0.025092
ENPP4	0.33222	0.738986	-0.219134	0.0590109	-0.134536	0.738986
ENPP6	-0.693181	0.221814	-0.508411	0.0957172	-0.0504518	0.982278
ENPP7	-0.454886	0.67299	-0.0168467	0.2764	-0.0373082	0.562675
EPGN	-0.295863	0.982278	-0.089127	0.491072	0.0670648	0.841545
EPHA1	0.0692341	0.597128	0.0257874	0.841545	0.173118	0.491072
EPHA10	-0.334588	0.406225	-0.0216363	0.465462	-0.353376	0.137562
EPHA2	-1.28617	0.0467785	-0.444361	0.548671	-0.623665	0.137562
EPHA3	0.302522	0.221814	0.172812	0.519459	-0.150596	0.463539
EPHA4	0.0165847	0.411143	-0.295603	0.239078	0.0415666	0.946869
EPHA5	-0.627826	0.899857	-0.879411	0.0652289	0.311553	0.0634314
EPHA6	0.366891	0.738986	0.143901	0.339495	-0.192551	0.161686
EPHA7	0.098233	0.31751	-0.508331	0.0278712	-0.0956176	0.463539
EPHA8	-0.899704	0.378376	-0.092857	0.221814	-0.0585436	0.668752
EPHB1	-1.23982	0.0824549	-0.0375169	0.705783	-0.0991508	0.658531
EPHB2	0.232983	0.705711	-0.0820493	0.548671	-0.136323	0.411143
EPHB3	-0.229448	0.67299	0.190419	0.463539	0.0250494	0.946869
EPHB4	-0.606944	0.190002	-0.690219	0.019681	-0.387905	0.738986
EPHB6	-0.97292	0.019681	0.0313209	0.60942	0.151451	0.578671
EPOR	0.879078	0.2764	-0.387531	0.148781	0.356891	0.136678
EPYC	0.32067	0.351735	0.336244	0.2764	-0.175883	0.124718
ERBB2	-0.532298	0.0719776	-0.401855	0.0106339	0.127141	0.239078
ERBB3	0.197675	0.67299	-0.186858	0.136678	0.15345	0.738986
ERBB4	-0.902162	0.0110219	-0.0788691	0.578671	0.0881215	0.406225
EREG	-0.368609	0.0661671	-0.181956	0.199287	0.134481	0.406225
ERMAP	-0.445497	0.151402	0.161717	0.0661671	0.302237	0.124718
ERVV-1	-0.341376	0.236844	-0.064328	0.221814	0.118481	0.562675
ERVV-2	-0.58164	0.0432394	-0.128703	0.67299	0.0430528	0.982278
ERVW-1	-0.179371	0.362434	-0.201225	0.0480457	-0.516023	0.705711
EVA1C	-0.595485	0.296478	-0.696352	0.0278712	-0.188213	0.946869
EVC2	-0.453416	0.151402	-0.161564	0.668752	-0.0596448	0.668752
EVI2A	-0.02695	0.578671	-0.164902	0.31751	0.052263	0.548671
EVI2B	0.391821	0.436889	-0.393363	0.0120704	0.0869348	0.982278
F2	0.181798	0.738986	0.0764245	0.362434	0.0635509	0.67299
F2R	0.643364	0.0221406	0.247967	0.221814	-0.044844	0.738986
F2RL1	-1.34608	0.0136764	-0.645669	0.25727	-0.956529	0.0221406
F2RL2	-0.491433	0.911564	-0.202997	0.436889	-0.216678	0.67299
F2RL3	-0.466638	0.217483	-0.0367603	0.640876	-0.43115	0.0871906
F3	-0.748294	0.148781	-0.254584	0.190002	0.26424	0.148781
F8	-0.750967	0.104899	0.35195	0.221814	0.570811	0.0192499
FAIM3	-0.452932	0.496792	-0.455689	0.2764	-0.0552873	0.148781
FAM171A1	-0.247163	0.326314	-0.0699433	0.705783	0.111491	0.496792
FAM171A2	-0.496798	0.151402	-0.222804	0.166279	-0.0384483	0.743525
FAM171B	-0.224573	0.519459	0.148384	0.411143	0.370474	0.104899
FAM174A	-0.45687	0.239078	-0.67774	0.463539	-0.82699	0.0311877
FAM174B	0.0890956	0.781894	0.0918917	0.38632	0.0802484	0.982278
FAM187A	0.0450834	0.982278	-0.14252	0.175418	-0.0378194	0.876434
FAM187B	-0.0495437	0.781894	-0.0512726	0.772757	0.161514	0.899857
FAM189A2	-0.14994	0.562675	-0.469788	0.0414863	0.0387067	0.781894
FAM209A	-0.466669	0.257392	0.0383184	0.806964	0.327354	0.38632
FAM209B	-0.443001	0.112829	0.00152333	0.982278	-0.214398	0.0824549
FAS	0.222657	0.640876	0.0102359	0.982278	-0.0288099	0.946869
FAT1	0.423741	0.091742	-0.370519	0.296478	0.268305	0.104899
FAT2	-0.0298917	0.743525	-0.0844784	0.841545	-0.269546	0.166279
FAT3	0.112747	0.982278	-0.142732	0.31751	0.315961	0.205461
FAT4	0.144088	0.876434	0.258921	0.239078	0.305284	0.190002
FBLN1	-0.849447	0.351735	-0.41823	0.806964	-0.575717	0.705783
FBLN2	-0.71772	0.0348374	-0.101159	0.411143	-0.25253	0.578671
FBLN7	-1.25188	0.091742	0.127971	0.463539	0.230243	0.104899
FBN1	-0.489458	0.0532931	-0.385653	0.205461	-0.376649	0.0388458
FBN2	-0.374104	0.0739451	-0.611073	0.0136764	-0.229789	0.217483
FBN3	0.134264	0.562675	-0.0412759	0.982278	-0.139578	0.979921
FCAMR	-0.507789	0.114766	-0.0820737	0.67299	-0.178754	0.0871906
FCER1A	0.858199	0.31751	-0.23897	0.114766	-0.0662547	0.529212
FCER1G	-2.42869	0.0590109	-0.68247	0.982278	-0.457771	0.463539
FCGR1A	-0.523635	0.31751	0.00190862	0.491072	0.197713	0.175418
FCGR1B	-0.301613	0.302118	-0.548436	0.00708094	0.0734365	0.435262
FCGR2A	0.236829	0.496792	0.0772823	0.911564	-0.219888	0.112829
FCGR2B	-0.404091	0.60942	-0.332327	0.0957172	0.311969	0.25727
FCGR3A	0.391114	0.25727	-0.0182265	0.738986	0.0511484	0.548671
FCGR3B	0.269313	0.31751	-0.0383224	0.239078	-0.00961214	0.982278
FCGRT	-0.740418	0.38632	-0.164544	0.25727	-0.121535	0.351735
FCRL1	-0.429151	0.175418	-0.193884	0.0532931	0.408227	0.2764
FCRL2	0.171116	0.806964	0.0562379	0.982278	0.0762412	0.578671
FCRL3	0.390324	0.529212	0.0167243	0.302118	-0.0345656	0.860154
FCRL4	0.121144	0.979921	-2.7e-05	0.378376	0.161678	0.465462
FCRL5	0.362046	0.548671	-0.315917	0.0120704	0.0843669	0.31751
FCRL6	-0.394751	0.190002	0.246471	0.31751	-0.112712	0.738986
FGF6	0.159763	0.705711	-0.00549046	0.548671	0.0262616	0.738986
FGFBP1	-0.43564	0.411143	-0.220658	0.0792878	-0.0434672	0.640876
FGFBP2	0.561444	0.114766	-0.0675785	0.738986	0.0677286	0.841545
FGFR1	-0.483459	0.217483	-0.329809	0.339495	0.136823	0.378376
FGFR2	0.246495	0.392872	-0.0860308	0.743525	-0.0882158	0.279146
FGFR3	-1.09524	0.00708094	-0.215896	0.463539	0.0219678	0.578671
FGFR4	-0.234186	0.465462	0.105999	0.0480457	-0.0629203	0.575621
FGFRL1	0.515471	0.406225	-0.142898	0.463539	-0.0521228	0.939813
FKBP11	-1.15242	0.00820885	0.190697	0.491072	0.11886	0.25727
FLRT1	0.198975	0.738986	-0.0305119	0.738986	-0.110582	0.911564
FLRT2	-0.511694	0.250536	0.134916	0.946869	-0.559484	0.436889
FLRT3	0.0374331	0.806964	0.189124	0.705711	0.0241704	0.463539
FLT1	-0.275947	0.597128	-0.717281	0.190002	-0.451008	0.705783
FLT3	-0.81605	0.182229	-0.356814	0.640876	-0.28841	0.982278
FLT3LG	0.0799029	0.519459	0.362283	0.0792878	-0.121646	0.640876
FLT4	0.15641	0.820801	0.117988	0.25727	0.151344	0.529212
FMOD	0.423068	0.217483	0.0162711	0.911564	0.052881	0.806964
FN1	-0.0506348	0.781894	0.00986307	0.946869	-0.433332	0.0652289
FNDC4	0.428009	0.0792878	0.0118548	0.491072	-0.290533	0.239078
FNDC5	-0.485391	0.137562	-0.477519	0.0348374	-0.55351	0.982278
FOLR1	-0.131822	0.519459	-0.17357	0.946869	0.294347	0.161686
FOLR2	-0.422454	0.239078	0.00766547	0.738986	0.266798	0.296478
FRAS1	-0.218667	0.772757	-0.273424	0.0590109	0.119136	0.705711
FREM1	-0.352032	0.578671	-0.0319926	0.841545	0.152544	0.411143
FREM2	0.261695	0.250536	-0.0836794	0.227057	0.00987762	0.976496
FREM3	0.110845	0.979921	-0.236611	0.175418	0.0857786	0.841545
FSHR	-0.488314	0.362434	-0.113001	0.911564	-0.026139	0.548671
FXYD1	-0.509996	0.239078	-0.399842	0.982278	-0.844026	0.221814
FXYD3	-0.103809	0.578671	-0.170492	0.436889	-0.270126	0.114766
FXYD4	-0.455438	0.982278	-0.151719	0.339495	0.496805	0.190002
FXYD5	-0.764468	0.436889	-0.304958	0.00629112	-0.538744	0.00361528
FXYD6	-0.29867	0.911564	-0.112759	0.640876	0.0973339	0.67299
FZD1	-1.33151	0.463539	-0.31496	0.911564	-0.763434	0.67299
FZD10	0.180853	0.743525	-0.0576267	0.946869	0.672374	0.0467785
FZD2	-0.226795	0.326314	0.0243401	0.67299	0.135114	0.25727
FZD3	-0.897916	0.166279	-0.0231511	0.339495	0.109545	0.296478
FZD4	-0.958678	0.0388458	-0.197046	0.0120704	0.0210622	0.841545
FZD5	0.27962	0.982278	0.0722111	0.982278	0.37055	0.161686
FZD6	-0.641724	0.236844	-0.0483229	0.982278	0.0680482	0.465462
FZD7	-0.476278	0.339495	-0.189577	0.463539	-0.179627	0.463539
FZD8	-0.703188	0.0348374	0.254542	0.0311877	0.356121	0.60942
FZD9	-0.235355	0.296478	-0.368065	0.00719281	0.308027	0.125349
GABBR1	-0.0750977	0.236844	-1.24241	0.0348374	-1.3964	0.114766
GABBR2	-0.10922	0.979921	-0.302139	0.0871906	0.243709	0.640876
GAS1	-0.113423	0.562675	0.142222	0.772757	-0.50014	0.137562
GCGR	-0.336502	0.882884	-0.0610769	0.257392	-0.0190016	0.970807
GFOD2	0.301451	0.296478	-0.395845	0.67299	-0.792485	0.205461
GFRA1	-0.243053	0.184898	0.231952	0.60942	-0.175708	0.465462
GFRA2	-0.0638371	0.578671	0.0666279	0.463539	0.182625	0.548671
GFRA3	0.712951	0.0311877	0.384965	0.136678	-0.207308	0.239078
GFRA4	-0.962737	0.105135	-0.22298	0.221814	0.405463	0.0957172
GFRAL	0.0175866	0.841545	-0.15125	0.982278	0.0835322	0.772757
GGH	0.0871365	0.772757	0.0354983	0.876434	0.0787146	0.597128
GHR	-0.590009	0.496792	0.457505	0.125349	-0.0233872	0.781894
GHRHR	-0.301319	0.406225	-0.274276	0.125349	-0.120484	0.166279
GINM1	-0.415269	0.939813	0.146444	0.772757	0.0320602	0.745869
GIPR	-0.876702	0.136678	-0.142366	0.125349	0.0376664	0.876434
GLIPR1	-0.426966	0.236844	0.120155	0.548671	-0.11964	0.351735
GLP1R	0.397198	0.982278	0.0921902	0.491072	0.0768216	0.705711
GML	-0.931473	0.025092	0.254803	0.112829	-0.065866	0.806964
GP1BA	0.19483	0.148781	-0.0846093	0.738986	-0.0843242	0.38632
GP1BB	-0.959105	0.31751	-0.447779	0.0311877	-0.429101	0.0248632
GP2	-0.728447	0.0957172	-0.344303	0.0532931	0.114879	0.519459
GP5	-0.331345	0.114766	-0.339027	0.190002	-0.175629	0.738986
GP6	-0.199317	0.911564	-0.0583724	0.876434	0.210664	0.339495
GP9	-0.728515	0.0739451	-0.529467	0.0957172	-0.0551902	0.781894
GPA33	-0.00994518	0.982278	-0.0951581	0.296478	0.0275175	0.67299
GPC1	-0.591297	0.0957172	-0.0749328	0.841545	0.0573768	0.296478
GPC2	-0.223602	0.436889	-0.0834664	0.296478	0.115122	0.548671
GPC3	-0.214348	0.190002	0.164524	0.982278	-0.112709	0.463539
GPC4	0.266412	0.257392	0.0669358	0.519459	0.0222371	0.705783
GPC5	-0.149617	0.491072	-0.484935	0.705711	-0.317391	0.38632
GPC6	0.337909	0.519459	0.248431	0.640876	-0.10321	0.982278
GPIHBP1	-0.146354	0.491072	-0.138068	0.548671	0.0914034	0.339495
GPNMB	-0.521532	0.0432394	-0.190986	0.114766	0.0757305	0.339495
GPR107	-0.07924	0.946869	-0.4304	0.491072	0.0695129	0.465462
GPR108	0.167354	0.529212	0.0731115	0.239078	0.131313	0.378376
GPR110	0.156534	0.491072	0.00686354	0.67299	0.0122683	0.946869
GPR112	-0.5014	0.0467785	0.19616	0.124718	0.153788	0.326314
GPR113	0.221786	0.67299	-0.191956	0.101852	0.458655	0.148781
GPR114	-1.56624	0.0792878	-0.773226	0.00549248	-0.913854	0.0432394
GPR115	-0.373412	0.38632	-0.0736951	0.38632	0.0312559	0.548671
GPR116	-0.301889	0.339495	0.0796426	0.578671	0.132117	0.362434
GPR124	-1.26796	0.00719281	0.000759903	0.806964	-0.127056	0.351735
GPR125	-1.0839	0.326314	-0.815102	0.0739451	-0.811445	0.743525
GPR126	0.464445	0.705711	0.106311	0.772757	-0.114138	0.911564
GPR128	-0.445134	0.491072	-0.135428	0.205461	0.317974	0.31751
GPR133	-0.153162	0.705711	-1.26339	0.339495	-0.727746	0.463539
GPR158	-0.398059	0.946869	-0.138532	0.548671	0.0968344	0.491072
GPR179	-0.941455	0.0792878	0.0529136	0.841545	0.12857	0.772757
GPR180	0.130353	0.946869	0.301718	0.125349	-0.0721785	0.491072
GPR37	-0.820664	0.025092	-0.109984	0.578671	0.214063	0.841545
GPR37L1	-0.436742	0.236844	-0.072999	0.60942	0.139667	0.38632
GPR56	-0.192423	0.738986	-0.481102	0.25727	-0.37411	0.2764
GPR64	-0.272318	0.411143	-0.139359	0.296478	0.056446	0.411143
GPR83	0.519188	0.0168029	0.138138	0.841545	-0.359651	0.0792878
GPR97	0.285043	0.772757	-0.477631	0.205461	-0.23096	0.806964
GPR98	-0.540543	0.0590109	-0.128662	0.125349	0.0583932	0.640876
GPRC5B	-0.447283	0.161686	-0.00986681	0.841545	0.0337683	0.841545
GPRC5C	-0.0501708	0.705711	-0.903739	0.0120704	-0.0759847	0.790882
GPRC6A	0.157229	0.911564	0.208608	0.0792878	0.0145158	0.911564
GRIA1	-0.113273	0.465462	-0.194916	0.0278712	-0.105704	0.772757
GRIA2	-0.471859	0.0722992	-0.0812748	0.275659	0.207193	0.118399
GRIA3	-1.11595	0.00708094	-0.140422	0.640876	-0.319533	0.406225
GRIA4	0.59814	0.339495	0.187869	0.578671	0.0340511	0.946869
GRID1	-0.374157	0.67299	0.0972329	0.946869	0.322193	0.0432394
GRID2	-0.0667137	0.836604	-0.292213	0.0824549	0.0386662	0.976496
GRIK1	0.336574	0.302448	-1.25464	0.302118	-0.0723239	0.426326
GRIK2	0.0125272	0.946869	0.0118427	0.982278	0.0503768	0.67299
GRIK3	-0.978101	0.0871906	0.0479781	0.25727	0.148542	0.38632
GRIK4	-0.591952	0.339495	-0.0817671	0.2764	0.0444039	0.876434
GRIK5	-0.0169195	0.911564	-0.328277	0.67299	-0.512091	0.0652289
GRIN1	0.0146746	0.529212	0.0593427	0.2764	-0.19775	0.279146
GRIN2A	0.439883	0.772757	0.171376	0.491072	0.0176327	0.876434
GRIN2B	0.30047	0.351735	-0.220275	0.0220028	0.0274107	0.562675
GRIN2C	-0.308526	0.236844	-0.157187	0.0719776	-0.147471	0.182229
GRIN2D	0.152027	0.946869	-0.0898465	0.738986	0.130643	0.435262
GRIN3A	-0.229039	0.578671	-0.0355129	0.705711	-0.0741741	0.67299
GRIN3B	-0.75329	0.0414863	-0.289712	0.0957172	-0.152734	0.25727
GRM1	0.0939051	0.461384	0.160642	0.463539	0.308025	0.0729383
GRM2	-0.0553576	0.876434	-0.211924	0.578671	0.262934	0.463539
GRM3	0.0159919	0.519459	0.130834	0.519459	0.259089	0.161686
GRM4	-0.703683	0.0590109	-0.143545	0.640876	-0.23343	0.0248632
GRM5	-0.250956	0.351735	-0.341466	0.0792878	0.168614	0.239078
GRM6	-0.54198	0.31751	-0.0680607	0.738986	0.133134	0.705711
GRM7	-0.628684	0.326314	0.261711	0.148781	0.282163	0.114766
GRM8	-0.590781	0.0661671	-0.197252	0.221814	-0.0628475	0.876434
GSG1L	0.0210071	0.979921	-0.0606727	0.979921	-0.039859	0.302118
GUCY2C	0.253875	0.529212	0.0843191	0.362434	-0.309433	0.137562
GUCY2D	-0.0450739	0.362434	-0.17038	0.0652289	0.174671	0.326314
GUCY2F	0.682285	0.0824549	-0.119539	0.519459	0.10785	0.668752
GYPA	0.145576	0.946869	-0.101717	0.114766	-0.174666	0.205461
GYPB	0.273731	0.640876	-0.0957834	0.772757	-0.125433	0.60942
GYPE	-0.254855	0.239078	-0.257622	0.0532931	0.0467896	0.841545
HAPLN2	0.63687	0.0957172	-0.00594225	0.911564	0.0790187	0.38632
HAPLN3	-1.56595	0.00201767	-0.344231	0.67299	-0.181793	0.463539
HAPLN4	0.550409	0.239078	-0.212502	0.463539	-0.335606	0.104899
HAVCR1	0.192484	0.190002	-0.0268255	0.491072	-0.0234541	0.738986
HAVCR2	-0.519697	0.114766	-0.0148779	0.806964	-0.146693	0.239078
HBEGF	0.0489867	0.939813	0.165954	0.436889	0.117312	0.519459
HCST	-0.0904575	0.548671	0.0363174	0.806964	0.0738142	0.738986
HEG1	0.40956	0.38632	0.136089	0.339495	0.0333276	0.772757
HEPH	0.0647079	0.911564	0.129778	0.104899	0.153505	0.239078
HEPHL1	0.191775	0.60942	-0.304568	0.0719776	0.158696	0.738986
HFE	-0.000846638	0.436889	-0.0834125	0.491072	-0.16477	0.148781
HFE2	-0.363571	0.239078	0.0849917	0.519459	0.0585365	0.411143
HHIP	-0.306551	0.38632	0.19602	0.205461	0.176466	0.296478
HHLA2	-0.432898	0.205461	-0.276913	0.148781	0.156696	0.31751
HLA-A	-0.0194558	0.738986	0.0751248	0.205461	0.0737706	0.876434
HLA-B	0.0564076	0.979921	-0.0971858	0.166279	-0.100375	0.406225
HLA-C	-1.19967	0.125349	-0.0833237	0.161686	0.370167	0.114766
HLA-DPA1	-0.991981	0.0652289	0.302597	0.0652289	-0.113909	0.31751
HLA-DPB1	-0.455435	0.296478	-0.265781	0.0221406	0.29633	0.136678
HLA-DQA1	0.068149	0.982278	-0.14167	0.411143	-0.368417	0.0432394
HLA-DQA2	-0.406932	0.239078	-0.0570149	0.31751	0.0558775	0.738986
HLA-DQB1	0.111146	0.362434	-0.0888296	0.463539	0.248385	0.0348374
HLA-DQB2	0.368206	0.519459	-0.0215253	0.772757	0.360341	0.104899
HLA-DRA	-0.485263	0.0739451	-0.227101	0.0348374	-0.0564947	0.668752
HLA-DRB1	-0.330771	0.279146	-0.0474856	0.982278	0.199773	0.217483
HLA-DRB5	0.0250974	0.668752	-0.0601513	0.705783	0.0181398	0.979921
HLA-E	0.570209	0.0590761	-0.214294	0.221814	0.16076	0.190002
HLA-F	-0.0588387	0.658531	-0.184021	0.101852	0.0581283	0.616465
HLA-G	-0.603294	0.124718	0.336782	0.136678	-0.254407	0.112829
HMCN1	0.00668116	0.597128	0.0291098	0.860154	-0.0603877	0.465462
HMCN2	-0.141035	0.296478	0.0332201	0.60942	0.0926169	0.738986
HPSE2	0.19586	0.860154	-0.00533825	0.979921	0.00396612	0.899857
HRAS	0.469863	0.112829	0.378134	0.0012779	0.26027	0.14883
HSPG2	-0.996892	0.465462	0.085825	0.982278	-0.0666814	0.182229
HTR2C	-0.0258918	0.939813	0.192822	0.578671	-0.219914	0.982278
HTR3B	0.291663	0.351735	0.165616	0.911564	-0.154836	0.378376
HTR3C	-0.347426	0.436889	-0.0214339	0.705711	-0.387883	0.0957172
HTR3D	-0.117357	0.435262	-0.0363433	0.876434	0.0660758	0.463539
HTR3E	0.264611	0.221814	-0.178031	0.161686	0.217125	0.339495
HYAL2	0.403124	0.279146	-0.427623	0.221814	0.0929157	0.640876
ICAM1	0.13423	0.60942	-0.46292	0.00820885	0.354372	0.0957172
ICAM2	0.0257867	0.781894	-0.0890084	0.979921	0.0359771	0.743525
ICAM3	-0.563518	0.640876	-0.156165	0.67299	-0.0607718	0.463539
ICAM4	0.150106	0.491072	-0.0921094	0.0792878	-0.361971	0.0739451
ICAM5	0.0620676	0.899857	0.177886	0.151402	0.437082	0.0388458
ICOS	0.0701696	0.339495	0.0589054	0.806964	0.000344529	0.806964
ICOSLG	0.358941	0.166129	-0.203388	0.668752	-0.269727	0.378376
IFI27L2	-0.159424	0.911564	-0.242415	0.205461	0.284573	0.0957172
IFI6	0.293685	0.351735	-0.344931	0.019681	0.238251	0.091742
IFNAR1	-0.586246	0.166279	-0.269924	0.60942	-0.454236	0.339495
IFNAR2	-0.917757	0.0364513	-0.290225	0.463539	-0.0172348	0.339495
IFNGR1	-0.540585	0.435262	-0.994321	0.190002	-0.459485	0.406225
IFNGR2	-0.327764	0.562675	-0.288541	0.136678	0.0451398	0.640876
IFNLR1	-0.415055	0.133499	-0.565843	0.137562	-0.729049	0.00873673
IGDCC3	-0.373952	0.465462	-0.0809611	0.60942	0.140275	0.841545
IGDCC4	0.445191	0.946869	-0.034002	0.982278	0.0618324	0.743525
IGF1R	-0.180693	0.330915	-0.451929	0.0348374	-0.462603	0.0652289
IGFALS	0.403541	0.463539	0.00584461	0.0792878	0.136706	0.362434
IGFLR1	0.104849	0.548671	-0.185731	0.463539	0.186961	0.161686
IGSF1	-0.233232	0.946869	-0.114563	0.738986	-0.102937	0.491072
IGSF11	0.254769	0.876434	0.0238279	0.982278	0.269161	0.190002
IGSF3	0.118148	0.899857	-0.276994	0.148781	-0.0525219	0.406225
IGSF6	0.107999	0.205461	-0.0563228	0.519459	-0.0410545	0.876434
IGSF8	-0.432337	0.899857	-0.170236	0.491072	0.0336072	0.899857
IGSF9	-0.457257	0.257392	-0.140368	0.435262	-0.031384	0.979921
IGSF9B	-0.697721	0.125349	-0.411948	0.0136764	-0.0241005	0.67299
IL10RA	0.00629318	0.743525	-0.0554615	0.60942	0.047448	0.738986
IL10RB	-0.248526	0.166129	-0.149659	0.0634314	0.261028	0.392872
IL11RA	-0.901949	0.0590109	-0.0640608	0.491072	-0.148067	0.296478
IL12RB1	-0.329132	0.362434	-0.677114	0.0652289	-0.661422	0.019681
IL12RB2	-1.01095	0.0480457	0.142733	0.548671	-0.148279	0.190002
IL13RA1	-0.73481	0.0136764	-0.184892	0.104899	-0.554045	0.0792878
IL13RA2	-0.644803	0.0792878	0.289618	0.0174636	-0.0816679	0.548671
IL15RA	-0.60414	0.0467785	-0.4068	0.548671	0.394694	0.0590109
IL17RA	0.232337	0.668752	-0.0353831	0.436889	0.00241297	0.820801
IL17RB	-1.03261	0.0127145	-0.175433	0.491072	0.0328207	0.806964
IL17RC	-0.148568	0.781894	-0.144778	0.911564	0.0339681	0.911564
IL17RE	-0.46195	0.640876	0.20185	0.339495	0.206919	0.31751
IL18R1	0.245516	0.519459	0.0835236	0.436889	-0.00138966	0.911564
IL18RAP	-0.544952	0.0661671	0.0390386	0.640876	0.00892862	0.31751
IL1R1	-0.796963	0.0154683	0.0205659	0.411143	-0.0794576	0.491072
IL1RAP	-0.141557	0.876434	0.0619006	0.841545	0.0866017	0.806964
IL1RAPL1	-0.272411	0.182229	-0.05275	0.632509	0.104988	0.496792
IL1RAPL2	-0.00119577	0.929568	0.239587	0.0652289	0.0304592	0.701708
IL1RL1	-0.00384723	0.640876	-0.143007	0.296478	-0.145941	0.911564
IL1RL2	-0.201012	0.436889	0.25201	0.0480457	0.203218	0.946869
IL20RA	-0.676964	0.0467785	0.152366	0.339495	-0.135813	0.136678
IL20RB	-0.693503	0.221814	-0.116973	0.519459	0.453298	0.0871906
IL21R	0.621384	0.0120704	0.114646	0.436889	0.275332	0.114766
IL22RA1	-0.282878	0.597128	-0.104048	0.668752	-0.352343	0.0824549
IL23R	0.261556	0.632509	-0.202183	0.463539	0.0452041	0.2764
IL27RA	0.182063	0.632509	-0.25532	0.67299	-0.139177	0.529212
IL2RA	-0.0796865	0.911564	0.0342504	0.67299	0.138005	0.31751
IL2RB	-1.04021	0.190002	-0.4502	0.0012779	-0.357148	0.841545
IL2RG	1.05302	0.221814	-0.19082	0.112829	0.276271	0.124718
IL31RA	0.120229	0.529212	0.258391	0.0467785	0.340768	0.257392
IL3RA	-0.981207	0.257392	-0.100033	0.296478	-0.0181745	0.899857
IL4R	-0.0998528	0.2764	-0.222212	0.911564	0.365459	0.161686
IL5RA	0.00231144	0.899857	-0.18995	0.548671	0.134819	0.436889
IL6ST	-0.180088	0.578671	-0.22828	0.339495	-0.414754	0.841545
IL7R	-0.0281271	0.979921	0.0124882	0.339495	0.0578387	0.519459
IL9R	-0.108007	0.781894	0.163019	0.436889	0.367369	0.0957172
ILDR1	-0.525709	0.2764	-0.13582	0.411143	0.00359567	0.60942
IMPG2	-0.0875405	0.738986	0.106806	0.339495	0.23796	0.148781
INSR	-0.661016	0.820801	-0.21129	0.114766	-0.23007	0.2764
INSRR	-0.587004	0.0348374	-0.191905	0.640876	-0.332782	0.205461
ISLR2	-0.387808	0.151402	-0.217402	0.166279	-0.117549	0.496792
ITGA1	-0.870677	0.548671	-0.269749	0.806964	-0.452796	0.339495
ITGA10	-0.738375	0.296478	-0.332898	0.548671	-0.0627652	0.705711
ITGA11	-0.26077	0.175418	0.0733666	0.982278	0.0136923	0.911564
ITGA2	0.371043	0.257392	-0.0889809	0.982278	0.184494	0.876434
ITGA2B	0.000834604	0.632509	-0.0843089	0.239078	0.216133	0.876434
ITGA3	0.353003	0.491072	-0.118354	0.806964	0.216613	0.491072
ITGA4	-1.10487	0.0480457	-1.03775	0.60942	-0.179687	0.899857
ITGA5	-0.759624	0.0661671	-0.544121	0.091742	-0.377133	0.091742
ITGA6	-0.983029	0.161686	-0.736589	0.436889	-0.618397	0.911564
ITGA7	0.153004	0.745869	-0.0659924	0.820801	-0.258986	0.38632
ITGA8	0.181106	0.463539	0.0204386	0.31751	-0.0520303	0.820801
ITGA9	0.172846	0.67299	-0.3517	0.125349	-0.305148	0.137562
ITGAD	-0.0329732	0.876434	-0.0510045	0.982278	-0.122721	0.463539
ITGAE	0.104568	0.296478	0.12798	0.436889	0.0991927	0.841545
ITGAL	-0.121135	0.841545	0.151981	0.296478	0.0310835	0.772757
ITGAM	0.0633528	0.911564	-0.184138	0.0652289	-0.183739	0.25727
ITGAV	-1.69069	0.00512668	0.178447	0.496792	-1.21338	0.00512668
ITGAX	-0.872338	0.0480457	-0.0645637	0.806964	0.285986	0.151402
ITGB1	-0.478859	0.0590109	-0.410985	0.00173593	0.096406	0.841545
ITGB2	-0.491201	0.0792878	-0.0767452	0.296478	0.165223	0.519459
ITGB3	-0.784301	0.0278712	-0.325581	0.578671	-0.399943	0.38632
ITGB4	-0.179933	0.575621	-0.0978685	0.806964	-0.139155	0.217483
ITGB5	-1.69325	0.00232394	-0.414099	0.0388458	-0.968694	0.00521109
ITGB6	-0.191228	0.60942	0.50567	0.00719281	0.28449	0.136678
ITGB7	-0.0621713	0.548671	0.154441	0.519459	-0.347307	0.136678
ITGB8	-0.339564	0.411143	0.312053	0.25727	0.0342957	0.67299
ITLN1	0.190282	0.548671	0.048905	0.876434	-0.0204494	0.946869
ITPRIP	-0.848316	0.0532931	-0.557441	0.0174636	-0.671983	0.491072
ITPRIPL1	-0.152715	0.351735	-0.30593	0.491072	0.0776344	0.841545
ITPRIPL2	-0.177422	0.705711	-0.429783	0.0480457	0.114773	0.411143
IYD	-0.129333	0.876434	-0.0264412	0.982278	0.0527722	0.67299
IZUMO1	-0.871017	0.0192499	0.0132311	0.578671	0.225707	0.217483
IZUMO2	0.0294326	0.806964	-0.161895	0.2764	-0.27392	0.205461
IZUMO3	-0.134669	0.820801	-0.110682	0.190002	-0.0487746	0.772757
JAG1	0.202817	0.979921	0.118347	0.946869	0.102105	0.640876
JAG2	-0.87203	0.67299	-0.0242822	0.806964	-0.305493	0.0957172
JAM3	-0.308204	0.205461	-0.151664	0.221814	-0.178115	0.548671
JTB	-0.355946	0.279146	-0.170759	0.0792878	-0.0650723	0.257392
KAL1	-0.469578	0.148781	0.134662	0.221814	-0.110356	0.0957172
KAZALD1	-0.758311	0.406225	-0.296046	0.148781	-0.631416	0.911564
KDR	-0.661643	0.0432394	-0.414057	0.114766	-0.251002	0.0957172
KERA	-0.791168	0.0957172	0.195182	0.0532931	-0.162625	0.339495
KIAA0247	-0.211358	0.38632	-0.671764	0.00173593	-0.375781	0.124718
KIAA0319	-1.10606	0.019681	-0.198447	0.114766	0.32492	0.60942
KIAA0922	-0.931664	0.114766	-0.0199864	0.67299	0.224881	0.31751
KIAA1324	-0.40751	0.182229	-0.142256	0.137562	0.203678	0.279146
KIAA1324L	-0.887762	0.0739451	-0.17882	0.0590109	-0.342805	0.632509
KIAA1644	-0.268039	0.151402	-0.0859204	0.876434	0.204112	0.463539
KIAA2013	-0.501618	0.326314	-0.467764	0.25727	-0.40867	0.705711
KIR2DL1	-0.379047	0.091742	0.0249825	0.632509	-0.0370161	0.939813
KIR2DL3	-0.136381	0.772757	0.0883338	0.772757	-0.0904615	0.67299
KIR2DL4	-0.240834	0.982278	-0.311138	0.190002	-0.219346	0.548671
KIR2DS4	0.247662	0.463539	-0.109707	0.296478	0.132316	0.491072
KIR3DL1	-0.528193	0.436889	-0.557501	0.0311877	-0.571496	0.205461
KIR3DL2	-0.125412	0.705711	-0.281963	0.0432394	-0.169055	0.640876
KIR3DL3	-0.528193	0.436889	-0.557501	0.0311877	-0.571496	0.205461
KIRREL	1.08491	0.00549248	0.310194	0.000933795	0.479394	0.0311877
KIRREL2	-0.823552	0.205461	0.21918	0.114766	0.416203	0.019681
KIRREL3	-0.0590777	0.743525	0.134376	0.148781	0.0653107	0.578671
KIT	0.00688734	0.860154	-0.491931	0.0590109	0.140932	0.426326
KITLG	-1.15989	0.296478	0.115705	0.175418	0.167327	0.302118
KL	0.712999	0.091742	0.158497	0.190002	-0.0666327	0.351735
KLK14	-0.410002	0.239078	-0.110754	0.339495	0.00985158	0.911564
KNG1	0.0368221	0.806964	0.210738	0.205461	-0.334989	0.463539
KRAS	-0.0159597	0.640876	-0.182686	0.25727	-0.30234	0.738986
KREMEN1	-1.06795	0.0047865	0.102807	0.491072	-0.00643484	0.738986
KREMEN2	-0.484496	0.124718	-0.122981	0.578671	0.0064599	0.705783
L1CAM	-0.721283	0.148781	0.337677	0.0432394	-0.0849123	0.190002
LAG3	-0.475551	0.0652289	-0.17773	0.519459	-0.0379322	0.67299
LAIR1	0.271546	0.841545	-0.0994416	0.60942	0.288594	0.125349
LAMA1	0.268603	0.275659	-0.0313785	0.668752	-0.0970573	0.426326
LAMA2	-0.0618246	0.772757	-0.547025	0.0480457	-0.142278	0.190002
LAMA3	-0.166625	0.705711	0.00476623	0.548671	0.12393	0.979921
LAMA4	-0.783439	0.0220028	-2.08805	0.296478	-0.24731	0.091742
LAMA5	0.425293	0.151402	-0.123624	0.279146	0.159288	0.496792
LAMB1	-1.76267	0.00822535	-0.799462	0.161686	-0.938553	0.137562
LAMB2	-0.00325662	0.67299	-0.319296	0.0388458	-0.119834	0.60942
LAMB3	-0.0323689	0.876434	-0.210301	0.946869	-0.0665184	0.60942
LAMB4	-0.243633	0.496792	-0.158055	0.0957172	0.257678	0.019681
LAMC1	-0.973378	0.0348374	-0.198976	0.60942	0.243234	0.0957172
LAMC2	-0.0497733	0.597128	0.104805	0.781894	0.210586	0.236844
LAMC3	-0.295706	0.217483	-0.146339	0.705711	-0.165683	0.339495
LAMP1	-0.205535	0.31751	-0.242294	0.38632	-0.0158307	0.876434
LAMP2	-0.36017	0.2764	0.00777143	0.772757	-0.00113505	0.946869
LAMP5	0.246038	0.772757	-0.309748	0.0221406	-0.125763	0.175418
LAYN	-0.135781	0.463539	0.129883	0.946869	0.238542	0.136678
LDLR	-1.72812	0.136678	-1.29534	0.000487643	-1.67163	0.00201767
LDLRAD2	-0.730616	0.0432394	-0.481135	0.491072	-0.380155	0.0871906
LDLRAD3	0.253812	0.31751	0.103317	0.806964	-0.0274603	0.114766
LEPR	-0.00401044	0.772757	-0.916142	0.00820885	-0.370949	0.175418
LGR4	-0.181386	0.38632	-0.0753034	0.578671	-0.122192	0.31751
LGR5	0.00253916	0.982278	-0.0956255	0.911564	-0.413538	0.2764
LGR6	0.856266	0.0220028	-0.0527483	0.578671	0.119541	0.465462
LHCGR	-0.288726	0.182229	-0.0497346	0.60942	-0.149132	0.151402
LHFP	-0.299959	0.465462	-0.247752	0.296478	-0.470228	0.491072
LHFPL1	-0.560891	0.239078	-0.184859	0.0957172	0.287488	0.0792878
LIFR	-0.402415	0.465462	-0.113542	0.578671	0.0554076	0.668752
LILRA1	0.474295	0.205461	-0.231089	0.38632	0.0525454	0.640876
LILRA2	-0.25985	0.221814	-0.179709	0.25727	0.0729322	0.362434
LILRA4	-0.760687	0.578671	-0.118996	0.946869	0.0544024	0.339495
LILRA5	0.217023	0.876434	0.111497	0.411143	-0.0426775	0.60942
LILRA6	-0.151751	0.578671	-0.176586	0.161686	0.112347	0.491072
LILRB1	-0.548532	0.148781	-0.29967	0.00313339	0.163136	0.60942
LILRB2	-0.802868	0.0526277	-0.216509	0.911564	-0.0178754	0.939813
LILRB3	-0.0191617	0.820801	-1.03174	0.60942	0.3701	0.151402
LILRB4	-1.06841	0.148781	-0.326515	0.114766	-0.218479	0.0661671
LILRB5	0.439494	0.125349	-0.334968	0.491072	-0.167502	0.982278
LINGO1	-0.892905	0.0324106	0.00138456	0.982278	-0.346701	0.411143
LINGO2	0.583303	0.772757	-0.00221264	0.190002	0.233686	0.0792878
LINGO3	-1.01029	0.182229	-0.116064	0.491072	-0.528925	0.597128
LINGO4	-0.223373	0.411143	0.0784654	0.772757	0.0467309	0.982278
LIPI	-0.0100908	0.743525	-0.232469	0.60942	-0.068908	0.640876
LMTK3	-0.126413	0.876434	0.0344539	0.548671	-0.323959	0.136678
LOX	-0.245159	0.578671	-0.039606	0.411143	-0.198773	0.221814
LOXL1	-0.726639	0.091742	-0.0072226	0.979921	0.34213	0.137562
LOXL2	-0.604822	0.0480457	-0.542005	0.0792878	-0.122252	0.182229
LOXL3	-0.234147	0.806964	-0.144727	0.548671	-0.322815	0.239078
LOXL4	0.0710692	0.772757	0.122554	0.705711	0.296402	0.0792878
LPHN1	-0.38308	0.529212	-0.260829	0.351735	-0.595858	0.182229
LPHN2	0.319024	0.738986	-0.0670544	0.982278	-0.144522	0.362434
LPHN3	-1.91154	0.00935146	-0.557408	0.0532931	-0.492938	0.640876
LPL	-0.259363	0.743525	-0.178719	0.463539	-0.140723	0.217483
LPO	0.216103	0.67299	0.247993	0.519459	0.489414	0.0590109
LRFN1	-0.0978332	0.529212	-0.310415	0.436889	0.054729	0.939813
LRFN2	0.0443873	0.496792	0.257903	0.279146	-0.317514	0.124718
LRFN3	-0.413281	0.668752	0.249814	0.00953254	0.315455	0.151402
LRFN4	-0.0344979	0.979921	-0.149941	0.339495	0.0993618	0.982278
LRFN5	-0.344366	0.124718	-0.127972	0.239078	0.175134	0.0824549
LRIG1	-0.400812	0.205191	0.0548983	0.640876	-0.10784	0.275659
LRIG2	-0.104297	0.406225	-0.243921	0.0324106	-0.151406	0.378376
LRIG3	-0.482276	0.302118	-0.563691	0.0388458	-0.255231	0.0739451
LRIT2	-0.296282	0.496792	0.318906	0.00629112	0.33605	0.0467785
LRP1	-0.0773216	0.781894	-0.177187	0.705711	-0.288546	0.911564
LRP10	-0.125758	0.658531	-0.46081	0.199287	-0.0393066	0.658531
LRP11	-1.04235	0.0285499	-0.125261	0.114766	-0.0745678	0.979921
LRP12	-1.54858	0.0136764	-0.541513	0.0120704	-0.364825	0.705711
LRP1B	-0.139525	0.705783	-0.0977067	0.436889	-0.126922	0.548671
LRP2	-0.137745	0.548671	0.417079	0.339495	-0.0380959	0.841545
LRP3	-0.315715	0.351735	-0.298743	0.705711	-0.1133	0.435262
LRP4	-0.545714	0.0467785	-0.239103	0.491072	-0.441528	0.0590109
LRP5	0.0356051	0.781894	-0.123756	0.979921	-0.052457	0.820801
LRP6	-1.15727	0.0154683	-0.228821	0.982278	-0.507948	0.640876
LRP8	-1.28844	0.705711	-0.0229185	0.38632	-0.416768	0.0532931
LRRC15	-0.340474	0.125349	0.23063	0.00271075	0.0833595	0.60942
LRRC17	0.442347	0.217483	0.178865	0.190002	0.265809	0.205461
LRRC19	-0.749663	0.136678	-0.0572174	0.705711	0.259532	0.0792878
LRRC24	-0.714369	0.60942	-0.344061	0.00935146	-0.0334575	0.806964
LRRC25	-0.685386	0.0467785	-0.105939	0.578671	0.018234	0.860154
LRRC26	-0.672555	0.0532931	-0.482995	0.00935146	-0.258018	0.982278
LRRC3	-1.27804	0.911564	-0.540811	0.411143	0.348973	0.0146333
LRRC32	-0.542258	0.562675	-0.355986	0.148781	-0.958698	0.578671
LRRC37A2	0.195786	0.946869	0.0714971	0.772757	0.0687215	0.339495
LRRC37A3	-0.709218	0.175418	-0.527805	0.0719776	-0.0964228	0.578671
LRRC37B	-0.506987	0.125349	-0.565366	0.148781	-0.188467	0.519459
LRRC38	0.417719	0.2764	-0.207177	0.772757	-0.130822	0.806964
LRRC3B	0.117769	0.279146	0.191674	0.326314	-0.191207	0.668752
LRRC3C	-0.59755	0.296478	-0.231216	0.161686	0.0854689	0.578671
LRRC4	-0.33473	0.519459	-0.293139	0.175418	0.147392	0.578671
LRRC4B	-0.176385	0.820801	-0.0108173	0.578671	0.0539693	0.465462
LRRC52	-0.988782	0.019681	0.134369	0.38632	0.370335	0.190002
LRRC55	-0.488925	0.411143	0.11598	0.463539	-0.218611	0.25727
LRRC70	0.401291	0.67299	0.0140222	0.841545	0.0850914	0.339495
LRRN1	-0.0271688	0.781894	-0.123864	0.519459	0.338796	0.091742
LRRN2	-0.384766	0.668752	-0.236272	0.182229	-0.710208	0.025092
LRRN3	0.571618	0.0739451	-0.0476795	0.411143	0.00945662	0.640876
LRRN4	-0.0496957	0.634252	-0.0296139	0.436889	-0.127023	0.562675
LRRN4CL	-0.636491	0.0729383	-0.303517	0.0324106	0.364505	0.0722992
LRRTM1	-0.0929185	0.705783	-0.0244995	0.640876	0.115742	0.562675
LRRTM2	-0.0612623	0.640876	-0.126319	0.31751	-0.0300057	0.738986
LRRTM3	0.687162	0.0414863	-0.0984683	0.841545	0.0215354	0.67299
LRRTM4	-0.24754	0.217483	3.02e-05	0.772757	-0.0247182	0.982278
LRTM1	0.201439	0.841545	-0.190359	0.0311877	-0.11707	0.578671
LRTM2	-0.575013	0.199287	-0.176629	0.0739451	-0.0669994	0.860154
LSAMP	-1.32248	0.0120704	-0.581918	0.00820885	-0.476537	0.221814
LTBP4	-0.158278	0.279146	-0.264133	0.221814	0.509094	0.019681
LTBR	0.701778	0.0432394	0.0136614	0.806964	0.173055	0.148781
LTK	-0.529571	0.217483	-0.546155	0.166279	-0.558525	0.166279
LUM	-0.192736	0.31751	-0.117304	0.239078	-0.0272306	0.519459
LY6D	-0.799143	0.161686	-0.0733469	0.806964	0.0293763	0.946869
LY6E	-0.193975	0.743525	0.0765523	0.806964	-0.0372081	0.882884
LY6G6C	-0.0284968	0.705711	-0.10918	0.38632	0.334912	0.114766
LY6G6D	0.0911276	0.548671	-0.0352232	0.841545	-0.0815199	0.640876
LY6G6F	-0.0942602	0.491072	0.332905	0.00234083	0.104653	0.519459
LY6H	0.118835	0.979921	0.218616	0.0792878	0.126451	0.939813
LY75	-0.445493	0.0367101	-0.232521	0.982278	-0.37129	0.0414863
LY86	-0.340811	0.562675	-0.158271	0.136678	-0.372082	0.0871906
LY9	-0.328625	0.362434	0.0888357	0.221814	-0.00921088	0.946869
LY96	-0.180757	0.946869	-0.138367	0.2764	0.0722271	0.60942
LYPD1	0.570292	0.31751	-0.664431	0.0136764	-0.742564	0.239078
LYPD2	0.123668	0.820801	-0.0574856	0.668752	0.0372425	0.979921
LYPD3	0.353254	0.0792878	0.0107333	0.2764	-0.0177271	0.876434
LYPD4	0.574569	0.0871906	-0.234588	0.738986	-0.0510833	0.841545
LYPD5	0.85198	0.112829	-0.138292	0.578671	0.168674	0.239078
LYPD6B	0.138749	0.806964	-0.0607914	0.296478	0.152193	0.491072
LYPD8	-0.334016	0.60942	-0.247833	0.0871906	-0.31093	0.161686
LYVE1	-0.242761	0.899857	-0.0601784	0.548671	0.423375	0.0957172
MADCAM1	-0.243458	0.463539	-0.283813	0.221814	-0.224	0.876434
MAG	0.229272	0.392872	0.173026	0.0661671	0.385329	0.2764
MAGT1	-0.260245	0.841545	-0.18257	0.0719776	-0.291802	0.491072
MAMDC2	0.161597	0.820801	-0.0281292	0.806964	0.0738808	0.597128
MAMDC4	-0.35746	0.296478	0.00498643	0.239078	-0.0715696	0.640876
MANSC1	0.0744273	0.616465	-1.1122	0.137562	-0.89982	0.137562
MANSC4	-0.0732253	0.362434	0.0245728	0.548671	0.429346	0.239078
MAP2K1	-0.396793	0.302118	-0.312238	0.104899	-0.0392889	0.899857
MAP2K2	-1.19351	0.31751	-0.180923	0.0957172	-0.0943312	0.548671
MAP2K3	-0.444132	0.351735	0.0760282	0.491072	-0.143702	0.279146
MAPK1	-2.22101	0.00234083	0.489396	0.175418	0.295286	0.31751
MAPK3	-0.24865	0.640876	0.00522657	0.38632	0.352556	0.0136764
MATN1	-0.448006	0.302118	-0.480867	0.114766	0.229403	0.239078
MCAM	0.352989	0.182229	0.175068	0.519459	-0.0295047	0.435262
MDGA1	0.0378192	0.929568	0.113632	0.463539	-0.0541821	0.790882
MDGA2	0.175371	0.806964	-0.772473	0.0106339	-0.119452	0.772757
MEGF10	-0.453376	0.790882	0.27177	0.562675	0.117763	0.392872
MEGF11	0.0131892	0.60942	-0.170453	0.161686	0.246025	0.104899
MEGF8	0.208939	0.60942	-0.0231897	0.519459	-0.0840469	0.463539
MEGF9	0.170895	0.436889	0.045588	0.161686	-0.222085	0.151402
MEP1A	-0.231848	0.772757	-0.0633263	0.296478	0.457144	0.519459
MEP1B	0.501246	0.104899	-0.218399	0.0590109	0.304726	0.2764
MEPE	0.0975865	0.491072	0.076441	0.221814	0.454257	0.67299
MERTK	-0.0582684	0.67299	-0.0532968	0.436889	0.206582	0.0652289
MET	-0.70812	0.25727	-0.100744	0.548671	0.1279	0.136678
MFAP2	0.216898	0.435262	-0.228424	0.190002	-0.355148	0.67299
MFAP3	0.180971	0.519459	0.0889794	0.463539	-0.125002	0.60942
MFAP3L	-0.512207	0.0367101	0.0972471	0.738986	0.157252	0.326314
MFAP4	-1.39466	0.0957172	-0.341504	0.519459	-0.313476	0.463539
MFAP5	-0.0207234	0.790882	0.236333	0.406225	0.00557888	0.976496
MFGE8	-0.0338559	0.548671	-0.249829	0.0154683	0.103922	0.772757
MFI2	-0.01091	0.411143	0.333043	0.148781	-0.0813623	0.491072
MICA	-0.26686	0.536102	-0.611362	0.205461	0.0362275	0.836604
MICB	-0.394356	0.519459	-0.258063	0.0388458	0.497327	0.0388458
MILR1	-0.158433	0.217483	-0.0444039	0.60942	-0.128915	0.705711
MMP1	-0.367727	0.378376	0.125133	0.406225	0.0310063	0.781894
MMP10	0.00811593	0.806964	-0.119628	0.205461	0.179001	0.31751
MMP11	-0.316156	0.148781	-0.251652	0.125349	-0.00235034	0.738986
MMP12	-0.53266	0.0719776	-0.163904	0.221814	0.228086	0.205461
MMP13	0.0895019	0.860154	-0.0869068	0.38632	0.0279102	0.911564
MMP14	0.406656	0.738986	0.159477	0.190002	0.166217	0.946869
MMP15	-0.712791	0.0532931	-0.168133	0.67299	-0.160187	0.841545
MMP16	0.420183	0.911564	-0.102418	0.946869	0.155513	0.339495
MMP17	-0.501702	0.302118	-0.685488	0.00719281	-0.963052	0.0154683
MMP19	0.23476	0.330915	-0.29643	0.137562	0.397499	0.0168029
MMP2	-0.90514	0.2764	-0.624641	0.0388458	-1.13606	0.00361528
MMP20	-0.441359	0.2764	-0.0757125	0.67299	0.052651	0.806964
MMP24	-0.0644267	0.583044	0.141086	0.738986	-0.14318	0.399948
MMP25	-0.6923	0.0414863	-0.879469	0.578671	0.18567	0.597128
MMP26	-0.450951	0.148781	-0.27155	0.00935146	0.127267	0.491072
MMP27	-0.669953	0.0792878	0.102857	0.491072	-0.0661857	0.296478
MMP28	-1.48719	0.0110219	-0.0146513	0.491072	-0.0711035	0.351735
MMP3	-0.431129	0.302118	0.203393	0.205461	-0.196397	0.705711
MMP7	-0.14849	0.562675	-0.194406	0.182229	0.372037	0.166279
MMP9	-0.596024	0.0532931	-0.17265	0.38632	0.163593	0.239078
MMRN2	0.357724	0.279146	-0.107964	0.67299	-0.353913	0.2764
MOG	-0.343225	0.118399	0.303105	0.137562	0.161693	0.227057
MPEG1	-0.157838	0.406225	-0.0589759	0.436889	-0.16635	0.148781
MPL	-0.989787	0.0480457	-0.398064	0.911564	-0.347357	0.548671
MPZ	0.303221	0.101852	-0.0822348	0.548671	-0.142232	0.217483
MPZL1	-0.959169	0.114766	-0.644681	0.296478	-1.28601	0.2764
MPZL2	0.572985	0.0364513	-0.109717	0.979921	0.3023	0.151402
MPZL3	0.108481	0.658531	0.105337	0.205461	0.136074	0.250536
MR1	0.162068	0.860154	-0.153597	0.0792878	0.397508	0.25727
MRC2	-0.813499	0.0311877	-0.498891	0.019681	-0.442965	0.296478
MSLN	-0.324585	0.435262	0.192294	0.436889	0.313087	0.112829
MST1R	-0.2464	0.326314	-0.440935	0.00935146	-0.0963698	0.911564
MUC12	0.0217287	0.970807	-0.296177	0.161686	0.108267	0.497997
MUC13	-0.00091661	0.876434	-0.0440594	0.640876	-0.175543	0.339495
MUC15	-0.0473658	0.519459	-0.167686	0.772757	0.234816	0.148781
MUC17	0.455891	0.161686	0.452797	0.239078	0.0171675	0.982278
MUC21	-0.0501597	0.491072	0.0445971	0.578671	-0.227082	0.296478
MUC22	0.200396	0.491072	-0.272902	0.239078	-0.00794622	0.982278
MUC3A	-0.364945	0.465462	-0.065036	0.772757	-0.318887	0.491072
MUC4	0.0524769	0.860154	0.036201	0.806964	0.0886697	0.529212
MXRA8	-1.84663	0.0719776	-0.974125	0.0957172	-0.808237	0.982278
NCAM1	-0.397236	0.491072	-0.193074	0.705711	-0.0336532	0.820801
NCAM2	-0.885485	0.0792878	0.10094	0.548671	0.0987912	0.640876
NCR1	-0.459763	0.411143	-0.732123	0.00820885	-0.0871665	0.982278
NCR2	-0.315298	0.578671	-0.457262	0.125349	-0.479098	0.67299
NCR3	-0.157602	0.575621	0.0715978	0.640876	-0.152068	0.257392
NCR3LG1	-0.291754	0.182229	-0.0612093	0.668752	-0.277874	0.112829
NCSTN	0.590152	0.339495	-0.676583	0.0432394	-0.4917	0.0432394
NEGR1	0.177542	0.860154	0.188211	0.435262	0.0187083	0.979921
NENF	-1.36688	0.00549248	-0.197072	0.911564	-0.375356	0.436889
NEO1	-0.567613	0.199287	0.115342	0.946869	-0.153869	0.67299
NETO1	-0.64066	0.781894	-0.0862861	0.175418	0.0686827	0.221814
NETO2	-0.138468	0.841545	0.103549	0.911564	-0.232876	0.136678
NFAM1	-0.86115	0.112829	-0.837537	0.00822535	-0.752108	0.302118
NFASC	-0.512519	0.841545	-0.47157	0.578671	-0.291232	0.0871906
NGFR	-0.583603	0.772757	-0.347857	0.491072	-0.19343	0.982278
NID1	-1.18297	0.411143	-0.735728	0.841545	-1.42638	0.0432394
NID2	-0.291651	0.562675	-0.0868524	0.640876	0.246342	0.0532931
NKAIN1	0.0829789	0.741879	-0.336339	0.0652289	0.0694207	0.772757
NLGN1	-0.0169583	0.578671	-0.168443	0.25727	0.108112	0.339495
NLGN2	-0.31981	0.137562	0.150611	0.114766	-0.0985569	0.190002
NLGN3	-0.197972	0.288558	0.17578	0.124718	0.356679	0.133499
NLGN4X	-0.828571	0.175418	-0.42423	0.148781	-0.03444	0.836604
NLGN4Y	0.303265	0.351735	-0.170633	0.091742	-1.19209	0.136678
NOMO1	-0.0848174	0.2764	-0.62283	0.0348374	-0.670205	0.00109339
NOMO3	0.162804	0.806964	-0.552807	0.0532931	-0.491924	0.0154683
NOTCH1	-0.170825	0.436889	-0.0455721	0.519459	-0.285051	0.104899
NOTCH2	0.181754	0.781894	-0.14597	0.166279	-0.0127696	0.632509
NOTCH3	-0.308621	0.239078	-0.435809	0.705711	0.222709	0.351735
NOTCH4	-0.590194	0.0174636	-0.248618	0.0348374	-0.0785644	0.876434
NPDC1	-1.48196	0.411143	-1.59456	0.0106339	-1.40486	0.0120704
NPHS1	0.685783	0.0652289	-0.330143	0.0719776	-0.0772447	0.326314
NPNT	0.275852	0.60942	0.0557332	0.640876	-0.244374	0.0719776
NPR1	-0.254124	0.781894	-0.186289	0.406225	-0.493107	0.112829
NPR2	0.306188	0.946869	-0.166892	0.578671	-0.0980708	0.60942
NPR3	-0.105467	0.806964	-0.122356	0.339495	0.0217213	0.876434
NPTN	-0.317153	0.435262	-0.341193	0.0719776	-0.187877	0.738986
NRAS	0.238696	0.578671	0.366583	0.0871906	0.0128772	0.982278
NRCAM	0.148201	0.860154	-0.272743	0.860154	0.0147921	0.979921
NRN1	-0.838217	0.362434	-0.201117	0.548671	-0.213559	0.463539
NRN1L	-0.411885	0.339495	-0.548997	0.0652289	-0.151543	0.362434
NRP1	-0.940076	0.125349	-0.37546	0.772757	-0.251233	0.67299
NRP2	-0.392808	0.091742	-0.270611	0.548671	-0.0811934	0.982278
NRROS	-0.293226	0.597128	-0.157189	0.0526277	0.0881835	0.632509
NRXN1	-0.217844	0.463539	-0.146189	0.296478	0.0843454	0.946869
NRXN2	-0.787776	0.25727	-0.294849	0.296478	-0.330765	0.190002
NRXN3	-0.171546	0.463539	-0.0894745	0.25727	0.116777	0.38632
NT5E	-0.143997	0.583044	0.021704	0.929568	-0.216613	0.184898
NTM	-0.684092	0.124718	-0.944316	0.190002	0.0993406	0.351735
NTN1	-0.141656	0.2764	-0.459525	0.0348374	-0.0938559	0.67299
NTN3	-0.0370017	0.912577	-0.397525	0.0232906	-0.154137	0.288558
NTN4	-0.203748	0.378376	0.31548	0.0154683	0.719999	0.00313339
NTNG1	-0.72688	0.0348374	-0.159308	0.378376	-0.0713511	0.705783
NTNG2	-0.357709	0.161686	-0.129383	0.705711	-0.254398	0.0127145
NTRK1	-0.575906	0.091742	-0.0240241	0.705711	0.105056	0.205461
NTRK2	-0.115933	0.562675	-0.0827255	0.296478	0.244138	0.60942
NTRK3	-0.353241	0.182229	0.0916813	0.411143	0.141827	0.217483
NUP210L	-0.373026	0.136678	0.167584	0.175418	-0.0917985	0.491072
NYX	0.040139	0.640876	0.0603347	0.772757	0.0923684	0.806964
OGN	-1.05703	0.31751	0.052139	0.205461	0.178087	0.31751
OLFM4	0.555056	0.124718	-1.80647	0.148781	0.26224	0.0590761
OMD	0.0896835	0.982278	-0.118135	0.239078	0.0103045	0.982278
OMG	-0.47068	0.205461	-0.219163	0.2764	-0.179002	0.548671
OPCML	-0.264421	0.36106	-0.148726	0.118399	-0.194836	0.536102
OPTC	0.280671	0.406225	-0.135123	0.25727	-0.184185	0.182229
OSMR	-0.385655	0.2764	-0.0899454	0.411143	0.141198	0.339495
PAM	-0.341312	0.461384	-0.123198	0.161686	0.085844	0.820801
PARM1	-0.594356	0.326314	-0.430087	0.0146333	-0.482342	0.899857
PCDH10	-1.39707	0.190002	0.286792	0.0480457	-0.313279	0.136678
PCDH11X	-0.555781	0.0420594	-0.551797	0.0348374	0.00953966	0.979921
PCDH11Y	-0.0893521	0.60942	-0.192895	0.0792878	-0.0515258	0.738986
PCDH12	0.167871	0.705783	-0.0648072	0.519459	0.830972	0.0388458
PCDH15	-0.359814	0.239078	0.0896305	0.911564	0.321303	0.0957172
PCDH17	0.471386	0.362434	-0.20214	0.239078	0.163049	0.640876
PCDH18	0.236765	0.205461	-0.277492	0.0248632	0.199193	0.296478
PCDH19	-0.198674	0.435262	0.472639	0.00201767	0.0965109	0.435262
PCDH20	-0.385657	0.25727	0.177848	0.982278	-0.263669	0.25727
PCDH7	-0.399481	0.296478	0.0857185	0.60942	-0.227633	0.339495
PCDH8	-0.716351	0.0220028	-0.312271	0.239078	-0.401378	0.239078
PCDH9	-0.0413082	0.743525	-0.083596	0.860154	0.271653	0.091742
PCDHA1	-1.36349	0.0278712	0.243722	0.0154683	0.334636	0.0480457
PCDHA10	-0.183749	0.640876	-0.013261	0.436889	0.0808802	0.946869
PCDHA11	-0.218186	0.435262	-0.0927303	0.362434	0.168156	0.175418
PCDHA12	-0.949606	0.0526277	-0.187465	0.860154	-0.361947	0.465462
PCDHA13	0.0701711	0.705783	0.435806	0.00173593	0.0915451	0.326314
PCDHA2	-0.0143845	0.876434	0.0602816	0.841545	-0.0229763	0.362434
PCDHA3	-0.345033	0.161686	-0.186553	0.60942	0.225351	0.67299
PCDHA4	0.151491	0.362434	-0.0909304	0.38632	0.0318184	0.772757
PCDHA5	-0.261642	0.221814	0.0407029	0.946869	-0.36451	0.0957172
PCDHA6	0.0345903	0.806964	0.0890508	0.578671	0.0409725	0.640876
PCDHA7	-0.129951	0.491072	-0.232047	0.0590109	0.202196	0.436889
PCDHA8	-0.61622	0.148781	-0.261834	0.31751	-0.401849	0.491072
PCDHA9	-0.234068	0.279146	-0.287352	0.326314	0.178666	0.435262
PCDHAC1	-0.248102	0.351735	0.0654159	0.982278	-0.0472723	0.632509
PCDHAC2	-0.457386	0.899857	0.148228	0.38632	0.0774223	0.339495
PCDHB1	-0.062335	0.876434	-0.0876045	0.876434	0.509317	0.0652289
PCDHB10	-0.690423	0.0136764	-0.0378964	0.772757	0.154461	0.463539
PCDHB11	0.0300885	0.436889	0.0594891	0.841545	0.226887	0.2764
PCDHB12	-0.013807	0.946869	-0.0438711	0.841545	0.184497	0.239078
PCDHB13	0.585727	0.0871906	-0.24696	0.148781	-0.0792865	0.705711
PCDHB14	-0.348365	0.125349	-0.165443	0.362434	-0.208768	0.705711
PCDHB15	-0.114961	0.578671	0.169723	0.67299	-0.00903772	0.946869
PCDHB16	-0.423351	0.0739451	0.146013	0.296478	0.129394	0.465462
PCDHB2	-0.0155967	0.982278	0.0157602	0.339495	-0.0167631	0.946869
PCDHB3	-0.155373	0.876434	-0.074771	0.946869	0.134718	0.31751
PCDHB4	-1.10092	0.0136764	0.101839	0.296478	0.0468788	0.578671
PCDHB5	-0.096895	0.496792	0.0420823	0.597128	0.0369309	0.743525
PCDHB6	-0.240511	0.411143	-0.0838306	0.640876	0.252751	0.841545
PCDHB7	-0.403649	0.239078	0.0307428	0.841545	-0.238259	0.114766
PCDHB8	-0.53434	0.463539	-0.0376264	0.239078	-0.0472895	0.548671
PCDHB9	-0.57737	0.0154683	-0.06959	0.705711	-0.178658	0.578671
PCDHGA1	-0.349134	0.406225	0.118988	0.578671	0.0278259	0.705783
PCDHGA10	-0.0324265	0.583044	0.0584289	0.491072	0.0128222	0.411143
PCDHGA11	-0.103211	0.899857	0.199261	0.239078	0.232485	0.182229
PCDHGA12	-0.0742892	0.745869	-0.300546	0.806964	0.225808	0.217483
PCDHGA2	-0.546132	0.0719776	0.0614929	0.841545	0.16693	0.60942
PCDHGA3	-0.723961	0.31751	-0.0176748	0.548671	0.123987	0.772757
PCDHGA4	-0.947559	0.103562	0.284496	0.705783	0.211438	0.118399
PCDHGA5	-0.0230679	0.899857	0.0645698	0.519459	-0.00823931	0.979921
PCDHGA6	-0.00398786	0.982278	0.13297	0.548671	0.213396	0.339495
PCDHGA7	-0.38162	0.0957172	0.0611228	0.362434	0.19122	0.296478
PCDHGA8	-0.121843	0.860154	0.111257	0.519459	0.533675	0.772757
PCDHGA9	-0.446777	0.351735	0.458849	0.463539	0.217997	0.435262
PCDHGB1	-0.303139	0.578671	-0.12351	0.60942	0.283892	0.0719776
PCDHGB2	-0.291375	0.148781	-0.0751966	0.911564	0.119889	0.463539
PCDHGB3	0.571352	0.00953254	-0.0104353	0.578671	0.137321	0.257392
PCDHGB4	0.843452	0.114766	0.116183	0.738986	0.529997	0.091742
PCDHGB5	-0.394718	0.0652289	-0.158196	0.190002	0.0746428	0.806964
PCDHGB6	0.21815	0.743525	-0.0226224	0.899857	0.0949211	0.257392
PCDHGB7	-0.159016	0.529212	-0.294735	0.217483	-0.0634916	0.529212
PCDHGC3	0.103749	0.979921	-0.33781	0.436889	0.354725	0.0871906
PCDHGC4	-0.583687	0.217483	-0.057668	0.781894	0.241131	0.302118
PCDHGC5	-0.424151	0.632509	-0.374127	0.0367101	0.244849	0.743525
PCSK4	0.528047	0.151402	0.0520936	0.668752	-0.221788	0.199287
PDCD1	-0.575315	0.239078	-0.689245	0.175418	-0.835316	0.148781
PDGFRA	-1.43789	0.0388458	-0.978554	0.000796019	-0.833035	0.114766
PDGFRB	-0.855564	0.0278712	-0.251643	0.578671	-0.170118	0.491072
PDPN	-0.611146	0.0739451	0.0718058	0.939813	0.0449416	0.781894
PEAR1	0.327045	0.640876	-0.00944435	0.705711	0.180345	0.239078
PECAM1	0.269749	0.946869	-0.288187	0.221814	0.313501	0.0652289
PI16	0.310892	0.2764	-0.124376	0.772757	0.0403065	0.529212
PIANP	-0.343545	0.911564	-0.0547695	0.190002	-0.317326	0.982278
PIGR	-0.41314	0.0957172	-0.0474282	0.60942	-0.0278641	0.705711
PIK3CA	-0.0448436	0.575621	-0.37192	0.0311877	0.322565	0.0432394
PIK3IP1	-0.487549	0.175418	0.0423213	0.705711	-0.328696	0.0957172
PILRA	-0.928143	0.0285499	-0.286648	0.841545	-0.244964	0.911564
PILRB	-0.224247	0.578671	-0.123717	0.982278	-0.00668088	0.939813
PKD1L2	-0.937073	0.743525	-0.352311	0.519459	-0.872143	0.0467785
PKD1L3	0.064515	0.548671	0.0289888	0.876434	0.0286732	0.876434
PKDREJ	-0.942217	0.0199355	-0.0546135	0.175418	-0.18819	0.820801
PKHD1	-0.233199	0.632509	-0.631373	0.0174636	-0.0694866	0.781894
PKHD1L1	0.173939	0.979921	0.0056533	0.435262	0.134186	0.529212
PLA2G2A	-0.434265	0.406225	-0.318262	0.362434	0.194075	0.236844
PLA2G7	-0.238113	0.279146	-0.447753	0.0106339	-0.146822	0.411143
PLA2R1	-0.616388	0.151402	-0.0620021	0.463539	-0.138803	0.378376
PLAT	-0.0686341	0.738986	-0.285615	0.148781	-0.331334	0.0871906
PLAUR	0.467855	0.0661671	0.0405497	0.982278	0.152516	0.946869
PLCE1	0.428138	0.124718	-0.198486	0.519459	0.360977	0.0957172
PLXDC1	0.242002	0.362434	-0.209861	0.019681	-0.0195333	0.939813
PLXDC2	0.328766	0.946869	-0.346982	0.911564	-0.0646773	0.806964
PLXNA1	0.0478625	0.939813	0.0463534	0.436889	0.117836	0.326314
PLXNA2	-0.322855	0.205191	-0.14775	0.899857	-0.263427	0.227172
PLXNA3	0.20809	0.536102	0.0484929	0.911564	0.25383	0.378376
PLXNA4	-1.3643	0.0590761	-0.10444	0.0792878	0.0882121	0.330915
PLXNB1	-0.220175	0.2764	0.195775	0.362434	0.0970492	0.946869
PLXNB2	0.0841411	0.745869	0.122754	0.339495	0.00999239	0.745869
PLXNB3	0.131678	0.790882	-0.0652419	0.790882	-0.111548	0.250536
PLXNC1	-0.356194	0.772757	-0.209916	0.104899	-0.0857924	0.578671
PLXND1	-0.199928	0.463539	0.122295	0.205461	0.150646	0.205461
PNLDC1	-0.00336403	0.899857	-0.540587	0.0792878	-0.0291503	0.939813
PODN	-1.18964	0.31751	-0.20614	0.221814	0.126305	0.175418
PODNL1	-0.273048	0.236844	-0.142413	0.199287	0.10048	0.939813
PODXL2	0.880129	0.0532931	-0.053534	0.578671	0.00191417	0.632509
PON1	0.32509	0.31751	-0.106756	0.772757	0.279054	0.0311877
PON2	-0.156189	0.548671	0.0648299	0.148781	-0.066043	0.876434
PON3	0.104079	0.841545	-0.00329187	0.946869	0.246634	0.104899
PQLC3	-0.195885	0.640876	-0.040894	0.640876	-0.0941926	0.597128
PRELP	0.870151	0.0526277	0.160284	0.982278	0.0297969	0.148781
PRIMA1	-1.32356	0.0168029	-0.654199	0.463539	-0.143164	0.465462
PRLR	-1.37715	0.0722992	-0.304143	0.362434	-0.323466	0.745869
PRND	-0.292565	0.296478	0.213652	0.190002	0.0498037	0.841545
PRNP	-0.335287	0.496792	-0.131373	0.979921	-0.530287	0.0661671
PROCR	-0.170904	0.705711	-0.300401	0.362434	0.0543283	0.772757
PRRG2	-1.15112	0.125349	-0.142121	0.25727	-0.0343346	0.982278
PRRG4	0.0553282	0.976496	-0.0996241	0.911564	0.0525193	0.976496
PRRT3	0.389539	0.67299	0.0546115	0.38632	-0.0934471	0.411143
PRRT4	0.671617	0.217483	-0.080115	0.899857	-0.0189745	0.860154
PRSS1	-0.951421	0.101852	0.348357	0.0590109	0.074815	0.491072
PRSS2	0.0380013	0.578671	-0.323218	0.175418	0.193691	0.2764
PRSS21	0.276573	0.148781	-0.0900981	0.175418	-0.0955375	0.411143
PRSS36	-0.391121	0.227057	0.0724007	0.461384	0.09512	0.461384
PRSS55	-0.341047	0.38632	-0.128714	0.0957172	-0.0905471	0.491072
PRSS8	0.00964128	0.806964	-0.0849783	0.161686	-0.203724	0.104899
PRTG	0.236967	0.435262	-0.368738	0.982278	-0.0626301	0.668752
PSCA	0.356057	0.0432394	-0.331164	0.0719776	-0.271299	0.31751
PTCRA	0.0721163	0.946869	-0.360788	0.339495	-0.230981	0.946869
PTEN	0.391214	0.136678	-0.0549841	0.548671	0.189814	0.463539
PTH1R	-0.397755	0.296478	-0.00416205	0.946869	-0.181167	0.463539
PTH2R	0.084873	0.705783	-0.11618	0.578671	-0.140518	0.946869
PTK7	-0.0746091	0.820801	-0.399845	0.205461	-0.303181	0.199287
PTPRA	0.598087	0.362434	-0.0364173	0.876434	-0.186642	0.31751
PTPRB	-0.316605	0.326314	0.174635	0.738986	0.170929	0.436889
PTPRC	-1.231	0.190002	-0.118458	0.339495	-0.407793	0.31751
PTPRD	0.144323	0.911564	-0.449244	0.0432394	-0.258219	0.841545
PTPRE	-0.388014	0.239078	0.159726	0.548671	0.0553516	0.772757
PTPRF	-0.195009	0.575621	-0.429406	0.435262	-0.636192	0.491072
PTPRG	-0.100638	0.548671	0.156358	0.946869	-0.130062	0.2764
PTPRH	-0.57527	0.0388458	-0.260695	0.0652289	0.0817277	0.738986
PTPRJ	0.377584	0.435262	-0.179249	0.124718	0.0247207	0.820801
PTPRM	-0.356537	0.979921	-0.0862418	0.461384	0.0889131	0.536102
PTPRN	0.478591	0.124718	0.0114323	0.982278	0.05372	0.491072
PTPRO	-0.409155	0.60942	0.0215549	0.982278	0.140644	0.463539
PTPRQ	-0.60636	0.190002	0.415609	0.0348374	0.210871	0.519459
PTPRR	-0.298019	0.302118	0.0774759	0.190002	0.0867699	0.496792
PTPRS	-0.990813	0.772757	-0.523133	0.136678	-0.782776	0.772757
PTPRT	-0.111457	0.38632	-0.337893	0.0120704	-0.273331	0.841545
PTPRZ1	-1.2053	0.00935146	0.03246	0.104899	0.153351	0.296478
PTTG1IP	-1.081	0.0590109	-0.317836	0.411143	-0.10667	0.67299
PVR	-0.328846	0.640876	-0.295559	0.841545	-0.0953399	0.705711
PVRL1	0.153061	0.705783	-0.188123	0.302118	0.140644	0.979921
PVRL2	0.627488	0.114766	-0.171975	0.239078	0.0717851	0.841545
PVRL3	0.173731	0.60942	-0.0184154	0.738986	-0.0328733	0.772757
PVRL4	0.292925	0.929568	-0.179263	0.705711	-0.0737506	0.939813
PXDN	0.301145	0.378376	-0.328369	0.876434	-0.0787073	0.705783
QSOX2	-0.13998	0.597128	0.179078	0.0957172	0.273489	0.137562
RAET1E	-0.0410562	0.701708	-0.164577	0.463539	0.341493	0.019681
RAET1G	-0.0322313	0.982278	-0.239525	0.0652289	0.286114	0.0432394
RAET1L	-0.371646	0.279146	-0.0956152	0.463539	-0.147244	0.465462
RAF1	-1.65214	0.021135	-0.0361219	0.705711	0.362398	0.091742
RALGDS	-1.16543	0.0047865	0.01401	0.772757	-0.127971	0.578671
RAMP1	-0.471382	0.772757	-0.248644	0.339495	-0.192001	0.60942
RAMP2	-0.11091	0.911564	-0.0230227	0.806964	-0.0326635	0.548671
RAMP3	-1.40051	0.640876	-0.408692	0.0221406	-0.623572	0.0590109
RBP3	-0.120598	0.743525	-0.417929	0.0480457	-0.78887	0.772757
RDH5	-0.294634	0.60942	0.038235	0.806964	0.0433035	0.296478
RECK	-0.691582	0.217483	-0.0933807	0.411143	0.134911	0.738986
RELL1	-0.560145	0.0221406	-0.0611417	0.578671	-0.237014	0.362434
RELN	-0.06435	0.463539	-0.249339	0.0719776	-0.0840505	0.38632
RELT	-0.067954	0.616465	-0.36656	0.00719281	-0.309302	0.151402
RET	0.755653	0.0232906	-0.557605	0.0278712	-0.43484	0.0122681
RGMA	-0.267777	0.14883	-0.448847	0.0432394	-0.333931	0.257392
RGMB	-1.31324	0.019681	-0.590424	0.0120704	-0.0354951	0.463539
RIN1	0.275169	0.67299	-0.397716	0.0311877	0.319672	0.0388458
RNF130	-0.0318165	0.738986	0.127858	0.239078	0.0808496	0.876434
RNF148	0.282741	0.463539	0.195627	0.911564	0.0778587	0.519459
RNF149	-0.665587	0.217483	-0.527811	0.148781	-0.129003	0.302118
RNF150	-0.165607	0.790882	-0.177789	0.465462	0.0831741	0.820801
RNF43	-0.359142	0.114766	-0.0793161	0.548671	-0.0793458	0.491072
ROBO1	-0.88501	0.190002	-0.0819302	0.362434	0.00621231	0.911564
ROBO2	-0.388119	0.25727	-0.0884274	0.31751	-0.270221	0.114766
ROBO3	-0.280149	0.362434	0.108456	0.296478	0.0795164	0.911564
ROR1	-0.1078	0.378376	-0.029077	0.939813	0.0830225	0.705783
ROR2	-0.974695	0.0467785	-0.421129	0.0106339	-0.602977	0.362434
ROS1	-0.106309	0.491072	0.0292111	0.339495	0.0444575	0.705711
RTN4R	1.00455	0.00873673	-0.365085	0.104899	0.242952	0.125349
RTN4RL1	-0.753757	0.275659	-0.0185913	0.326314	0.0176027	0.820801
RTN4RL2	0.3032	0.60942	0.182938	0.0311877	-0.0174038	0.806964
RYK	-0.0460738	0.529212	-0.181421	0.236844	-0.28345	0.0824549
SBSPON	0.0694079	0.411143	-0.110942	0.982278	-0.180234	0.60942
SCARF1	-0.0916712	0.497997	0.00322085	0.976496	0.00989556	0.976496
SCARF2	0.0164317	0.982278	0.27266	0.0136764	-0.0928497	0.640876
SCN1B	-1.6611	0.0110219	-0.642797	0.436889	-1.19125	0.205461
SCN2B	-0.569658	0.60942	-0.280031	0.436889	0.0541917	0.705711
SCN3B	0.193666	0.491072	0.0424268	0.841545	-0.00869393	0.982278
SCN4B	-0.827101	0.0420594	-0.412056	0.137562	0.0987252	0.257392
SCTR	0.370054	0.151402	0.126815	0.190002	0.158484	0.362434
SDC1	-1.0903	0.339495	-0.730148	0.0388458	-1.21196	0.019681
SDC2	0.184559	0.841545	-0.0647657	0.436889	0.0248718	0.982278
SDC4	0.209054	0.876434	0.306113	0.0136764	-0.296097	0.0792878
SDK1	0.289217	0.790882	-0.203827	0.124718	-0.0724339	0.461384
SDK2	-0.574833	0.982278	-0.678676	0.0311877	-0.51207	0.137562
SECTM1	-0.991477	0.0127145	-0.323528	0.519459	-0.657926	0.0146333
SEL1L2	0.117147	0.597128	-0.107425	0.435262	-0.0788663	0.632509
SELE	-0.0782026	0.632509	0.0456749	0.411143	0.193526	0.132942
SELL	0.363452	0.351735	0.367714	0.362434	-0.320387	0.0526277
SELP	0.136782	0.820801	-0.117356	0.257392	-0.0789098	0.406225
SELPLG	-0.454206	0.326314	0.298294	0.239078	-9.81e-05	0.946869
SEMA4A	-0.203248	0.362434	-0.0771372	0.0957172	0.047647	0.982278
SEMA4B	-0.629556	0.0871906	-0.43499	0.161686	-0.221352	0.205461
SEMA4D	-0.679102	0.0652289	-0.961595	0.0154683	-0.602738	0.519459
SEMA4F	-0.187099	0.705711	-0.091271	0.239078	0.168118	0.496792
SEMA4G	-0.30302	0.668752	-0.193468	0.2764	-0.0757681	0.705711
SEMA5A	-0.681485	0.0590761	-0.0733342	0.562675	-0.166004	0.781894
SEMA6A	-0.167366	0.841545	-0.146191	0.946869	-0.0821999	0.772757
SEMA6B	-0.677008	0.125349	-0.0874722	0.911564	0.0750501	0.982278
SEMA6C	0.0974002	0.632509	-0.353847	0.125349	-0.049402	0.772757
SEMA6D	-0.326281	0.257392	-0.0265929	0.668752	-0.022721	0.743525
SEMA7A	-0.55908	0.841545	0.0898421	0.519459	0.139614	0.640876
SERPINA5	0.296648	0.67299	-0.0497452	0.296478	-0.0185836	0.436889
SERPINC1	0.0964775	0.221814	-0.271375	0.221814	0.215711	0.239078
SERPINE2	-0.611692	0.0590109	0.0223175	0.738986	-0.196473	0.205461
SEZ6	0.222379	0.411143	0.0995613	0.519459	0.206382	0.362434
SEZ6L2	-0.338344	0.982278	-0.420169	0.0047865	-0.141374	0.738986
SFTPA1	0.0787306	0.491072	-0.287772	0.161686	0.0788913	0.806964
SFTPA2	-0.201928	0.435262	-0.0669579	0.175418	-0.132364	0.0871906
SFTPB	-0.13222	0.548671	-0.300839	0.0719776	0.315189	0.0221406
SFTPD	0.0688061	0.772757	-0.0566585	0.738986	-0.160306	0.31751
SGCA	-0.983389	0.0388458	0.150334	0.738986	0.220064	0.406225
SHISA4	-0.12462	0.979921	-0.638821	0.104899	-0.573649	0.0120704
SHISA6	-0.0676089	0.860154	0.160213	0.806964	0.144492	0.876434
SHISA7	-0.771376	0.221814	-0.431632	0.0792878	-0.260629	0.491072
SHISA8	-0.0295493	0.578671	-0.424719	0.019681	0.0821986	0.67299
SIDT1	-0.0784187	0.743525	-0.229053	0.104899	-0.0910658	0.60942
SIGLEC1	0.427913	0.406225	-0.260123	0.0792878	0.716351	0.0174636
SIGLEC10	0.229351	0.705783	0.028384	0.578671	0.373168	0.205461
SIGLEC11	0.250941	0.578671	0.112869	0.738986	-0.267025	0.0871906
SIGLEC12	-0.49239	0.112829	0.131998	0.743525	0.0101509	0.939813
SIGLEC14	-0.024911	0.820801	-0.145251	0.199287	-0.277644	0.199287
SIGLEC15	0.229143	0.339495	0.145675	0.38632	0.0986516	0.60942
SIGLEC5	-0.0301532	0.67299	-0.169661	0.296478	-0.153392	0.31751
SIGLEC6	-0.915442	0.0719776	-0.2897	0.114766	0.0582124	0.548671
SIGLEC7	-0.351287	0.166279	0.67348	0.0652289	-0.0455147	0.562675
SIGLEC8	-0.31162	0.221814	0.0472636	0.806964	0.209041	0.25727
SIGLEC9	-0.914423	0.911564	-0.87423	0.0590109	-1.1157	0.339495
SIRPA	-0.15627	0.465462	-0.0414209	0.279146	-0.245093	0.279146
SIRPB1	-0.604402	0.125349	0.0132277	0.982278	0.153833	0.2764
SIRPB2	-1.44673	0.217483	-0.360523	0.257392	0.0024429	0.976496
SIRPG	0.899573	0.205461	-0.056149	0.982278	0.208245	0.136678
SIT1	-0.242026	0.806964	-0.168672	0.205461	-0.20274	0.491072
SLAMF1	-0.921648	0.0110219	-0.0721111	0.548671	-0.21263	0.519459
SLAMF6	-0.501638	0.205191	-0.511879	0.0590761	-0.146042	0.461384
SLAMF7	-0.516832	0.351735	-0.560743	0.205461	-0.0761259	0.899857
SLAMF8	-0.285411	0.463539	-0.148361	0.0792878	0.100455	0.136678
SLAMF9	-0.148031	0.38632	-0.165539	0.705711	0.0526174	0.60942
SLC10A5	0.153086	0.463539	-0.215876	0.0957172	0.369368	0.104899
SLC24A1	0.323187	0.275659	-0.307517	0.0311877	0.372675	0.118399
SLC24A3	-0.416543	0.136678	0.244835	0.806964	0.095756	0.529212
SLC24A4	-0.197292	0.496792	-0.177962	0.876434	0.135405	0.217483
SLC24A5	-0.627828	0.60942	-0.356303	0.019681	0.363202	0.125349
SLC39A10	-2.06274	0.00201767	-0.304526	0.0311877	-0.731513	0.136678
SLC39A14	-1.5196	0.151402	-0.0538988	0.529212	-0.654858	0.0285499
SLC39A4	-0.292338	0.705711	-0.489303	0.221814	-0.157932	0.436889
SLC39A6	-0.846568	0.0127145	-0.294781	0.463539	-0.0826363	0.435262
SLC46A3	-0.22839	0.982278	-0.115855	0.2764	0.0882984	0.640876
SLC8A1	-0.00881648	0.496792	-0.110225	0.239078	0.0908243	0.2764
SLC8A2	-1.54973	0.0480457	-0.871049	0.0957172	-0.619512	0.911564
SLC8A3	0.422913	0.38632	-0.139683	0.104899	-0.0630901	0.436889
SLITRK1	-0.0179798	0.982278	0.164601	0.876434	-0.0246048	0.705711
SLITRK2	-0.837435	0.279146	-0.166534	0.2764	0.0921173	0.705783
SLITRK3	0.505619	0.221814	-0.136742	0.806964	-0.0532801	0.841545
SLITRK4	-0.677332	0.0590109	-0.0282279	0.911564	-0.155368	0.436889
SLITRK5	-0.642091	0.161686	-0.297105	0.221814	-0.0950562	0.806964
SLITRK6	0.106235	0.946869	-0.0080113	0.946869	0.00388856	0.982278
SMIM7	-0.365598	0.411143	-0.923798	0.411143	-0.927247	0.0532931
SMIM9	0.0599322	0.38632	0.0306813	0.806964	0.0596844	0.841545
SMO	0.141304	0.38632	-0.00630697	0.911564	-0.48765	0.00719281
SMOC1	-0.308672	0.105135	-0.683838	0.161686	-0.203745	0.705711
SMOC2	0.418356	0.426326	-0.101155	0.275659	0.0591995	0.976496
SOD3	-1.35285	0.0957172	-0.304429	0.0532931	0.0746339	0.946869
SOGA3	-0.306121	0.781894	-1.341	0.190002	-0.779515	0.136678
SORCS1	-0.110887	0.772757	0.00795983	0.60942	-0.329081	0.0388458
SORCS2	-0.494132	0.279146	-0.784544	0.0120704	-0.0912651	0.743525
SORCS3	0.187893	0.860154	0.0579894	0.351735	0.22751	0.217483
SORL1	-0.00428538	0.435262	-0.236833	0.221814	0.38993	0.772757
SORT1	-1.74212	0.31751	-2.05577	0.00149079	-0.256387	0.199287
SOST	0.193781	0.911564	0.0611006	0.436889	0.226425	0.339495
SPACA1	-0.100649	0.772757	0.230322	0.436889	0.119216	0.876434
SPACA4	0.072698	0.67299	0.0686167	0.548671	-0.0211128	0.876434
SPAM1	-0.132712	0.60942	-0.000710815	0.519459	-0.0415913	0.772757
SPARC	-0.665216	0.0661671	0.00838257	0.911564	-0.162368	0.632509
SPARCL1	-0.736854	0.0957172	0.0905558	0.841545	0.471124	0.0285499
SPINT2	-0.0735702	0.745869	-0.0660832	0.979921	0.165615	0.227057
SPN	-0.716097	0.911564	-0.271042	0.982278	-0.678095	0.38632
SPOCK1	-0.594151	0.0432394	0.122464	0.362434	0.119514	0.946869
SPOCK2	0.262703	0.640876	-0.0212214	0.911564	0.127202	0.519459
SPOCK3	0.261969	0.519459	-0.0137852	0.806964	0.0465689	0.982278
SPON1	-0.699305	0.0311877	0.161466	0.362434	0.0967869	0.67299
SPON2	-1.61184	0.00935146	-0.274684	0.0719776	0.107969	0.562675
SPPL2C	-0.810134	0.0414863	-0.220949	0.548671	0.270075	0.124718
SPRN	-0.770786	0.519459	-0.225785	0.772757	0.299894	0.705783
SSPO	-1.13578	0.0590109	-0.822217	0.00173593	-0.895628	0.0348374
STAB1	-0.256266	0.239078	-0.0595585	0.705711	0.154347	0.161686
STAB2	-1.23788	0.0661671	0.167838	0.519459	0.0220009	0.899857
STIM1	-1.28192	0.0652289	-0.935578	0.0871906	-0.491244	0.946869
SUSD1	-0.301799	0.406225	-0.239649	0.806964	-0.106395	0.781894
SUSD2	-0.374773	0.199287	-0.731399	0.841545	-0.0836389	0.668752
SUSD4	0.360921	0.112829	-0.317397	0.0136764	0.138714	0.548671
SUSD5	-0.925067	0.0232906	-0.0685515	0.519459	0.15503	0.743525
TACSTD2	-0.0774418	0.597128	0.209082	0.491072	-0.113214	0.296478
TAPBPL	0.114648	0.529212	-0.0795027	0.578671	-0.27846	0.781894
TARM1	-0.0455112	0.562675	-0.395153	0.137562	0.200604	0.426326
TAS1R1	0.121782	0.982278	0.0606461	0.491072	-0.203802	0.463539
TAS1R2	-0.640884	0.190002	0.251088	0.463539	-0.0528732	0.67299
TAS1R3	0.432518	0.60942	-0.441164	0.0432394	0.050377	0.911564
TCTN2	-0.735355	0.104899	-0.276284	0.0432394	0.014312	0.738986
TCTN3	0.0902067	0.806964	0.0265409	0.296478	0.111951	0.548671
TDGF1	-0.126132	0.378376	-0.041161	0.406225	0.0550311	0.820801
TECTA	0.557869	0.0324106	-0.297468	0.0110219	0.157612	0.257392
TECTB	-0.211171	0.976496	0.0644561	0.982278	0.278865	0.205461
TEK	-0.23319	0.60942	0.172601	0.841545	0.151902	0.378376
TEX101	0.0432579	0.876434	0.0165343	0.161686	0.446715	0.0154683
TFF3	0.337174	0.496792	-0.135407	0.562675	-0.100644	0.899857
TGFB1	-0.279031	0.790882	0.543901	0.0174636	-0.157022	0.597128
TGFBI	-0.0309626	0.860154	-0.103112	0.519459	0.435924	0.0192499
TGFBR1	-0.854302	0.36106	-1.60102	0.982278	-0.0957562	0.442178
TGFBR2	0.330518	0.911564	0.79153	0.00935146	0.342557	0.0311877
TGOLN2	-1.3576	0.205461	-0.719101	0.00629112	-0.830684	0.0590109
THBD	-0.955132	0.124718	-0.0632538	0.548671	0.192645	0.491072
THSD1	0.287162	0.820801	-0.212164	0.351735	0.0793629	0.632509
THSD4	-0.0221167	0.745869	-0.222859	0.0792878	0.146088	0.257392
THSD7A	-0.444335	0.118399	-0.803497	0.00173593	0.0442311	0.616465
THSD7B	-0.0178925	0.841545	-0.350299	0.125349	0.176075	0.946869
THY1	-0.731359	0.0311877	-0.516236	0.00935146	-0.643049	0.411143
TIAM1	-0.198919	0.411143	-0.1845	0.491072	-0.539122	0.239078
TIE1	0.27269	0.548671	-0.223732	0.136678	0.270695	0.112829
TIGIT	-0.0854349	0.899857	-0.125887	0.0871906	-0.0713755	0.860154
TIMD4	-0.475304	0.0792878	-0.442834	0.0532931	0.188853	0.221814
TIMP3	-0.330153	0.124718	-0.222958	0.0168029	-0.0303489	0.705783
TLCD1	-0.242684	0.979921	0.0765461	0.217483	0.105388	0.820801
TLR1	0.0625033	0.640876	-0.125877	0.578671	0.430257	0.00719281
TLR10	-0.0907855	0.38632	-0.151443	0.136678	0.0561854	0.640876
TLR2	0.00188674	0.743525	-0.143264	0.199287	-0.134837	0.668752
TLR4	0.235151	0.578671	-0.238135	0.114766	0.103533	0.491072
TLR5	-0.712076	0.166279	0.433516	0.946869	-0.176469	0.326314
TLR6	-0.190706	0.406225	0.0894117	0.738986	0.357494	0.0871906
TLR8	0.305034	0.302118	-0.229523	0.31751	0.00243876	0.939813
TM2D1	-0.242162	0.406225	-0.308521	0.182229	-0.143815	0.205191
TM2D2	-0.411638	0.820801	-0.373968	0.0324106	-0.368423	0.0146333
TM2D3	-1.73192	0.00608158	-0.453058	0.302118	-0.394622	0.899857
TM7SF3	1.00984	0.0432394	-0.0208964	0.491072	0.000420825	0.548671
TM9SF3	-0.347495	0.326314	0.0718308	0.841545	-0.174749	0.175418
TM9SF4	0.0904818	0.979921	-0.75785	0.00416368	-0.475541	0.463539
TMCO3	-1.05584	0.0871906	-0.612907	0.982278	-0.890146	0.239078
TMED1	0.132669	0.632509	-0.264557	0.296478	0.108429	0.221814
TMEFF1	-0.158651	0.578671	-0.561727	0.00201767	-0.0190479	0.982278
TMEFF2	-0.028018	0.67299	-0.250134	0.125349	-0.282066	0.25727
TMEM108	0.0935852	0.496792	-0.0408163	0.979921	-0.0111476	0.497997
TMEM119	-0.179794	0.60942	0.0376226	0.841545	0.136613	0.982278
TMEM123	-0.108716	0.820801	-0.0752906	0.236844	0.226864	0.435262
TMEM129	-1.32439	0.0278712	-0.0445502	0.339495	0.0994436	0.491072
TMEM132C	0.525525	0.257392	0.141537	0.982278	-0.0934305	0.435262
TMEM132D	0.219945	0.302448	-0.231745	0.091742	0.249797	0.0285499
TMEM132E	0.0484969	0.658531	-0.666824	0.00935146	-0.00583756	0.743525
TMEM139	-0.017854	0.640876	-0.275228	0.221814	0.237562	0.0652289
TMEM150A	0.255803	0.519459	-0.331979	0.436889	0.126312	0.640876
TMEM150B	-0.68018	0.0590761	-0.328498	0.025092	0.208051	0.351735
TMEM154	-0.784176	0.463539	0.0447389	0.519459	0.180777	0.339495
TMEM158	-0.201195	0.378376	-0.204057	0.199287	0.0145105	0.899857
TMEM161A	-1.38917	0.491072	-0.340471	0.0590109	-0.0701579	0.60942
TMEM178A	-0.390043	0.239078	-0.0370632	0.772757	0.0292271	0.982278
TMEM178B	-0.11094	0.876434	-0.0741603	0.491072	-0.152	0.411143
TMEM182	-1.03482	0.0532931	0.276748	0.0957172	0.439823	0.199287
TMEM190	0.594563	0.491072	-0.311881	0.0174636	-0.0679614	0.876434
TMEM207	0.256768	0.362434	-0.102471	0.982278	0.149212	0.296478
TMEM210	-0.331589	0.979921	-0.241669	0.411143	-0.469122	0.491072
TMEM213	-0.428517	0.101852	-0.0605866	0.190002	0.159054	0.31751
TMEM219	-1.65956	0.0120704	-0.379987	0.0136764	-0.522602	0.221814
TMEM235	0.10154	0.705711	0.209342	0.0792878	0.178349	0.548671
TMEM25	-0.337171	0.876434	-0.180858	0.190002	-0.384676	0.136678
TMEM256	-0.607473	0.0661671	-0.076186	0.578671	0.0423781	0.60942
TMEM27	0.117628	0.876434	0.0766138	0.548671	0.155538	0.519459
TMEM41A	-0.256546	0.239078	0.0463876	0.705711	-0.100788	0.911564
TMEM52	0.238852	0.67299	-0.0817141	0.67299	0.271884	0.104899
TMEM52B	0.231988	0.790882	-0.172056	0.0930783	0.288409	0.184898
TMEM81	0.0623632	0.882884	0.316328	0.125349	-0.201338	0.205461
TMEM87A	-1.51123	0.236844	-0.56538	0.911564	-0.475557	0.25727
TMEM87B	-0.816328	0.0480457	-0.345905	0.0154683	0.478832	0.125349
TMEM89	-0.879485	0.0221406	-0.0210227	0.205461	-0.0988777	0.738986
TMEM8A	-0.0601643	0.465462	-0.656485	0.0792878	-0.545282	0.436889
TMEM92	0.215796	0.597128	0.12972	0.0467785	0.353193	0.738986
TMEM95	-0.654744	0.136678	-0.00782393	0.436889	0.0463049	0.578671
TMEM99	0.0678702	0.435262	-0.0502973	0.979921	-0.0408608	0.820801
TMEM9B	-0.0501825	0.519459	-0.0201644	0.221814	-0.148393	0.60942
TMIE	0.389603	0.205191	-0.0232907	0.899857	0.228178	0.236844
TMIGD1	-1.05764	0.019681	-0.102187	0.31751	0.306025	0.0719776
TMIGD2	-0.0124412	0.705711	-0.139038	0.296478	-0.0851204	0.491072
TMPRSS12	-0.307261	0.227057	-0.0493146	0.939813	-0.167649	0.860154
TMX1	-1.15759	0.00149079	-0.327166	0.339495	0.0232222	0.911564
TMX2	-0.411481	0.302118	-0.722601	0.0154683	-0.524438	0.205461
TMX4	-0.204291	0.738986	0.309952	0.221814	0.130037	0.411143
TNC	-0.630319	0.0532931	-0.458907	0.0480457	-0.0790548	0.806964
TNFRSF10A	-0.750197	0.597128	-0.415585	0.0590109	0.100103	0.463539
TNFRSF10B	0.0958698	0.982278	0.0586924	0.911564	0.400849	0.114766
TNFRSF10C	0.194076	0.491072	0.0259867	0.738986	0.379608	0.0168029
TNFRSF10D	-1.24111	0.0824549	-0.216384	0.0661671	-0.616592	0.00521109
TNFRSF11A	-1.46357	0.67299	-0.195937	0.221814	-0.0924506	0.182229
TNFRSF12A	-0.133328	0.529212	0.176525	0.841545	-0.115769	0.841545
TNFRSF14	-0.314206	0.519459	0.285013	0.0248632	0.0733655	0.705711
TNFRSF18	-0.600956	0.025092	-0.219565	0.221814	-0.122649	0.562675
TNFRSF19	-1.32107	0.0480457	-0.553881	0.38632	-0.204717	0.38632
TNFRSF1A	0.447388	0.491072	-0.337032	0.0590109	0.051155	0.772757
TNFRSF1B	-0.690597	0.0174636	-0.348044	0.0174636	0.0845776	0.60942
TNFRSF21	-0.0377128	0.705783	-0.827075	0.436889	0.065581	0.876434
TNFRSF25	0.0598075	0.911564	0.118347	0.841545	-0.160262	0.491072
TNFRSF4	-0.0366	0.705711	-0.244063	0.0278712	-0.110929	0.411143
TNFRSF8	0.827722	0.0957172	0.07226	0.548671	0.262791	0.806964
TNFRSF9	0.801222	0.239078	0.430516	0.00149079	0.0405402	0.738986
TNN	-0.812214	0.151402	0.144826	0.38632	0.00265751	0.860154
TNR	-0.222032	0.351735	-0.0146538	0.860154	-0.14514	0.781894
TNXB	0.00355677	0.781894	0.00174698	0.705711	-0.044404	0.772757
TP53	0.141078	0.148781	0.48141	0.00109339	0.657042	0.0136764
TP53I13	-0.532552	0.125349	-0.329921	0.175418	-0.84697	0.668752
TPBG	-0.195842	0.221814	-0.164432	0.0719776	0.205148	0.221814
TPBGL	-0.664731	0.0957172	-0.00808049	0.806964	-0.007736	0.982278
TPO	-0.0124154	0.406225	-0.416376	0.00201767	-0.0524721	0.772757
TPSG1	-0.146855	0.772757	-0.134422	0.876434	0.136378	0.911564
TRABD2A	-0.56359	0.0590761	-0.135862	0.0590761	0.0665434	0.820801
TRABD2B	-0.100438	0.435262	-0.335008	0.124718	-0.0776026	0.378376
TREH	0.18292	0.632509	-0.15279	0.221814	0.129049	0.738986
TREM1	0.568555	0.136678	0.0755763	0.148781	0.061705	0.876434
TREM2	0.185841	0.60942	-0.00910948	0.491072	-0.075124	0.946869
TREML1	-0.207467	0.221814	0.185012	0.148781	0.0693213	0.548671
TREML2	-0.1909	0.302118	0.0464413	0.0871906	0.1416	0.351735
TRIL	0.772139	0.876434	-0.262877	0.104899	0.0100626	0.743525
TSHR	-1.57231	0.148781	-0.517665	0.0652289	-0.206624	0.578671
TVP23C	-0.144563	0.406225	-0.296849	0.205461	0.157558	0.339495
TXNDC15	0.387841	0.236844	0.0902509	0.705711	0.49034	0.411143
TYRO3	-0.484918	0.351735	-0.315209	0.632509	0.161168	0.632509
TYROBP	-1.062	0.461384	-0.461213	0.0532931	-0.623021	0.426326
UBAC2	0.934784	0.0311877	-0.14286	0.38632	0.301516	0.148781
UCMA	0.044058	0.743525	-0.104713	0.411143	0.0120099	0.820801
UGT2A1	-1.12146	0.0414863	-0.0601112	0.841545	-0.0162553	0.841545
UGT2A3	-0.0722959	0.616465	-0.213355	0.392872	0.0850876	0.461384
UGT3A1	-0.605132	0.0414863	-0.218709	0.00953254	0.284909	0.378376
UGT3A2	0.204821	0.860154	-0.0868597	0.640876	-0.260236	0.217483
UGT8	0.550553	0.0480457	-0.0307687	0.104899	-0.10508	0.806964
ULBP1	0.171529	0.705711	-0.187722	0.876434	0.4703	0.0532931
ULBP2	0.341055	0.738986	-0.263938	0.0719776	0.396568	0.148781
ULBP3	-0.423033	0.31751	-0.506422	0.175418	0.2869	0.0367101
UMODL1	-0.410293	0.296478	0.140021	0.705711	0.583721	0.0367101
UNC5A	-0.0637241	0.496792	-0.329026	0.0652289	0.0497411	0.911564
UNC5B	-1.99349	0.104899	-0.539491	0.982278	-0.743836	0.104899
UNC5C	-0.317822	0.302118	0.0363834	0.820801	-0.0162422	0.939813
UNC5D	-1.28528	0.00521109	-0.276917	0.114766	-0.447403	0.979921
UPK2	0.0328496	0.876434	0.239693	0.841545	0.439344	0.0957172
UPK3B	0.0451867	0.491072	0.00732614	0.2764	-0.500359	0.0414863
UPK3BL	0.215928	0.578671	0.00864959	0.911564	0.0967471	0.578671
VASN	0.1298	0.705711	-0.247191	0.841545	0.0724421	0.463539
VCAM1	-0.0449522	0.743525	-0.166744	0.436889	-0.077683	0.578671
VCAN	-0.410387	0.326314	-0.29761	0.00935146	-0.268985	0.806964
VIPR1	-0.605792	0.491072	-0.107216	0.239078	-0.295223	0.548671
VIPR2	0.110022	0.929568	0.00902104	0.378376	-0.0766844	0.562675
VIT	0.0434722	0.946869	-0.249435	0.125349	0.127905	0.60942
VLDLR	0.149861	0.982278	0.0486609	0.876434	0.0268049	0.738986
VNN1	0.31144	0.239078	-0.328818	0.148781	0.223659	0.25727
VNN2	-1.81268	0.166279	-0.0896947	0.772757	-0.144624	0.31751
VSIG1	-0.410659	0.491072	-0.0401988	0.411143	0.0582592	0.738986
VSIG10	-0.0473053	0.979921	-0.439552	0.0480457	-0.237345	0.0957172
VSIG10L	-0.323148	0.175418	-0.0668497	0.519459	0.152064	0.548671
VSIG2	-0.894568	0.0719776	-0.385677	0.0590109	0.0894534	0.738986
VSIG4	0.0908115	0.860154	0.119734	0.148781	0.186517	0.217483
VSIG8	-0.687182	0.0480457	-0.122236	0.705711	-0.139287	0.772757
VSTM1	-0.451771	0.0957172	0.189159	0.205461	0.1299	0.519459
VSTM2B	-0.105998	0.806964	0.0317916	0.806964	-0.0888485	0.578671
VSTM4	-0.19818	0.2764	-0.109799	0.738986	0.320337	0.221814
VSTM5	-0.349957	0.250536	-1.16748	0.31751	0.336952	0.820801
VTCN1	-0.521749	0.979921	-0.221281	0.239078	-0.0306295	0.790882
VTN	0.118418	0.738986	-0.177643	0.578671	0.11714	0.411143
VWA1	0.0120251	0.979921	-0.0637465	0.743525	0.127638	0.496792
VWC2	-0.857863	0.2764	-0.175307	0.362434	0.0266663	0.548671
WNT1	0.492714	0.166279	-0.271127	0.0414863	0.303773	0.136678
WNT10A	-0.212845	0.946869	-0.300918	0.0348374	0.246592	0.104899
WNT10B	-0.186182	0.426326	-0.675471	0.104899	0.00766683	0.979921
WNT11	-0.39896	0.578671	-0.286802	0.362434	-0.538725	0.019681
WNT16	-0.300898	0.562675	-0.0470195	0.25727	-0.0874023	0.836604
WNT2	0.219902	0.946869	-0.212165	0.239078	-0.196735	0.2764
WNT2B	-1.33543	0.25727	-0.763136	0.0532931	-0.922113	0.362434
WNT3	-0.163084	0.529212	-0.337543	0.0136764	0.221848	0.406225
WNT3A	-0.10767	0.548671	0.0104839	0.38632	0.385313	0.0348374
WNT4	0.771657	0.0532931	0.20408	0.738986	0.0416935	0.463539
WNT5A	0.335136	0.632509	0.203348	0.2764	0.31796	0.0590761
WNT5B	0.1605	0.876434	0.2455	0.114766	0.174054	0.114766
WNT6	-1.39112	0.0348374	-0.209094	0.205461	-0.782237	0.0221406
WNT7A	-2.12075	0.0047865	-1.72841	0.578671	-1.32127	0.175418
WNT7B	-1.18786	0.0526277	-0.268784	0.0526277	-0.155408	0.435262
WNT8A	0.113007	0.979921	-0.127277	0.31751	-0.0632937	0.496792
WNT8B	0.218838	0.946869	-0.209481	0.2764	0.0385981	0.979921
WNT9A	-0.370706	0.239078	-0.891232	0.436889	0.0901835	0.378376
WNT9B	-0.258877	0.38632	-0.137469	0.38632	-0.211998	0.161686
XG	0.349582	0.519459	0.0155284	0.982278	-0.0709764	0.436889
XPNPEP2	-0.119891	0.378376	-0.1915	0.199287	-0.251687	0.199287
YTHDF3	0.673128	0.257392	0.164027	0.339495	0.443914	0.0146333
ZACN	-0.167613	0.38632	-0.0461916	0.548671	-0.150308	0.205461
ZAN	-0.13988	0.378376	0.092224	0.529212	0.0951483	0.705783
ZG16	0.240944	0.738986	-0.302735	0.221814	-0.132196	0.31751
ZMYM6NB	0.139945	0.536102	0.0511251	0.465462	0.27284	0.0739451
ZNRF3	-0.312614	0.217483	0.161237	0.982278	-0.0898638	0.529212
ZNRF4	0.0580729	0.67299	0.225301	0.148781	0.107776	0.876434
ZP1	-0.693693	0.0106339	-0.00733244	0.841545	-0.217297	0.0532931
ZP2	-0.186872	0.31751	-0.127781	0.221814	-0.0293033	0.239078
ZP3	0.755292	0.0285499	-0.534839	0.161686	0.117519	0.562675
ZP4	0.0691418	0.982278	-0.123193	0.578671	0.165821	0.137562
ZPLD1	0.188505	0.745869	0.00258138	0.60942	0.412807	0.0220028
pseudo_1000	-0.47965	0.247956	0.0915169	0.462213	-0.194144	0.247956
pseudo_1001	-0.457825	0.200171	0.0633049	0.687228	0.267658	0.360167
pseudo_1002	0.106476	0.916352	0.0783309	0.674398	0.288117	0.20754
pseudo_1003	0.782422	0.115153	0.427648	0.115153	0.171683	0.344522
pseudo_1004	-0.391722	0.293581	-0.0499209	0.752694	0.0749755	0.674398
pseudo_1006	0.0362531	0.953002	0.0321417	0.679925	-0.240589	0.288743
pseudo_101	0.138194	0.687228	0.0830039	0.486783	0.0663632	0.582986
pseudo_1011	-0.0411227	0.859655	-0.132622	0.376659	-0.200388	0.479408
pseudo_1013	-0.897583	0.115153	-0.120971	0.293581	-0.417701	0.141449
pseudo_1015	0.742577	0.141449	0.0917408	0.400775	0.390886	0.172131
pseudo_1016	0.0736256	0.970802	0.0528054	0.53379	-0.376221	0.153444
pseudo_1017	-0.199948	0.399876	0.0204966	0.687228	0.111981	0.360167
pseudo_1018	-0.855537	0.044104	0.00128232	0.970802	0.246762	0.399876
pseudo_1019	0.782422	0.115153	0.427648	0.115153	0.171683	0.344522
pseudo_1020	0.167464	0.833621	-0.167031	0.247956	-0.0246924	1
pseudo_1023	-0.339428	0.400775	-0.0531805	0.674398	0.228631	0.247956
pseudo_1024	0.0425271	0.916352	-0.198772	0.20754	0.111808	0.59948
pseudo_1025	0.483629	0.175651	0.280259	0.0523921	0.0171626	0.912564
pseudo_1028	-0.491793	0.153444	-0.143909	0.256519	0.0304221	0.797786
pseudo_1029	0.185815	0.674398	-0.0579592	0.528578	0.0602994	0.833621
pseudo_103	0.0577092	0.953002	-0.0407905	0.813625	0.0290435	0.813625
pseudo_1030	0.229118	0.399876	0.0834802	0.442108	0.232396	0.099541
pseudo_1031	-0.0488508	0.970802	0.0704861	0.442108	0.485075	0.036951
pseudo_1032	-0.0654951	0.854791	0.0739602	0.486783	0.0335753	0.912564
pseudo_1033	0.782422	0.115153	0.427648	0.115153	0.171683	0.344522
pseudo_1034	-0.366901	0.399876	0.0637811	0.6342	0.433691	0.044104
pseudo_1035	0.0425271	0.916352	-0.198772	0.20754	0.111808	0.59948
pseudo_1036	0.268787	0.288484	0.0153351	0.970802	0.118487	0.360167
pseudo_1037	-0.427955	0.133439	0.142923	0.133439	0.154932	0.854791
pseudo_104	-0.840279	0.172131	0.0492314	0.833621	0.579265	0.115153
pseudo_1040	-0.870795	0.141449	-0.0466668	0.833621	-0.0857411	0.752694
pseudo_1041	-0.515766	0.20754	-0.430292	0.115153	0.151545	0.400775
pseudo_1042	-0.515766	0.20754	-0.430292	0.115153	0.151545	0.400775
pseudo_1043	0.0222301	0.797786	0.0421969	0.582986	0.175167	0.200171
pseudo_1044	0.0767532	1	0.0189498	1	-0.0933245	0.59948
pseudo_1045	0.0112347	0.854791	-0.0532865	0.486783	0.0386647	0.854791
pseudo_1046	-0.319399	0.378253	-0.0418046	0.632421	-0.191026	0.632421
pseudo_1047	-0.675223	0.0619443	0.0224251	0.741841	-0.139943	0.288484
pseudo_1048	-0.046364	0.854791	-0.0328276	0.741841	0.071678	0.582986
pseudo_1049	-0.112791	0.59948	-0.241152	0.172131	0.146585	0.462213
pseudo_1050	-0.515766	0.20754	-0.430292	0.115153	0.151545	0.400775
pseudo_1051	-0.0309587	0.687228	0.0852329	0.32303	0.0975294	0.582986
pseudo_1052	0.35176	0.293581	0.0886294	0.528578	0.176675	0.293581
pseudo_1054	0.143263	0.6342	0.0119929	0.912564	-0.0976251	0.442108
pseudo_1056	-0.391722	0.293581	-0.0499209	0.752694	0.0749755	0.674398
pseudo_1057	-0.456941	0.0874138	-0.250012	0.0251142	-0.0514495	1
pseudo_106	-0.398876	0.288484	-0.0747704	0.486783	0.345536	0.133439
pseudo_1061	0.292477	0.200171	-0.170468	0.153444	-0.170943	0.175651
pseudo_1062	-0.0753715	0.674398	0.0773784	0.752694	-0.0439485	0.833621
pseudo_1063	-0.356515	0.279023	-0.132997	0.0738707	-0.145912	0.406104
pseudo_1065	-0.37626	0.344522	0.194329	0.172131	0.504007	0.141449
pseudo_1066	0.0452872	1	-0.110989	0.344522	-0.248667	0.172131
pseudo_1067	-0.412754	0.288484	-0.0788277	0.399876	-0.167204	0.227101
pseudo_1070	0.0767532	1	0.0189498	1	-0.0933245	0.59948
pseudo_1071	0.337841	0.26279	0.0862334	1	-0.00556158	0.953002
pseudo_1072	0.383888	0.20754	0.137574	0.20754	0.121703	0.528578
pseudo_1074	0.348807	0.32303	-0.0408963	0.582986	-0.0509253	0.741841
pseudo_1076	0.361897	0.247956	-0.0533925	0.59948	-0.151302	0.400775
pseudo_1077	0.106476	0.916352	0.0783309	0.674398	0.288117	0.20754
pseudo_1078	0.0596402	0.970802	-0.0899112	0.399876	0.0092417	0.970802
pseudo_1079	0.543326	0.0853803	0.0879886	0.32303	0.0936749	0.970802
pseudo_108	-0.144744	0.528578	-0.0707484	0.462213	-0.0971938	0.528578
pseudo_1080	0.167464	0.833621	-0.167031	0.247956	-0.0246924	1
pseudo_1081	0.341055	0.442108	0.0929572	0.175651	0.193108	0.288484
pseudo_1082	-0.0772955	0.741841	0.0398447	0.6342	0.0456369	0.797786
pseudo_1083	0.223056	0.528578	-0.287543	0.141449	-0.190584	0.293581
pseudo_1084	0.106476	0.916352	0.0783309	0.674398	0.288117	0.20754
pseudo_1086	-0.515766	0.20754	-0.430292	0.115153	0.151545	0.400775
pseudo_1087	0.184837	0.752694	0.13287	0.247956	-0.137357	0.462213
pseudo_1088	-0.870795	0.141449	-0.0466668	0.833621	-0.0857411	0.752694
pseudo_1089	-0.870795	0.141449	-0.0466668	0.833621	-0.0857411	0.752694
pseudo_1090	0.62086	0.172131	-0.100742	0.400775	-0.00852611	1
pseudo_1091	0.262041	0.32303	0.107288	0.32303	-0.410432	0.0728945
pseudo_1092	0.273367	0.288484	0.0397387	0.687228	-0.14433	0.256519
pseudo_1093	-0.0753715	0.674398	0.0773784	0.752694	-0.0439485	0.833621
pseudo_1094	-0.410415	0.288484	-0.0510105	0.486783	-0.255513	0.153444
pseudo_1095	0.167464	0.833621	-0.167031	0.247956	-0.0246924	1
pseudo_1096	0.62086	0.172131	-0.100742	0.400775	-0.00852611	1
pseudo_1097	0.0425271	0.916352	-0.198772	0.20754	0.111808	0.59948
pseudo_1098	-0.870795	0.141449	-0.0466668	0.833621	-0.0857411	0.752694
pseudo_11	0.184837	0.752694	0.13287	0.247956	-0.137357	0.462213
pseudo_110	-0.897583	0.115153	-0.120971	0.293581	-0.417701	0.141449
pseudo_1101	-0.339428	0.400775	-0.0531805	0.674398	0.228631	0.247956
pseudo_1102	0.0030831	0.768231	-0.111064	0.194757	-0.0651353	0.51678
pseudo_1103	0.223056	0.360094	-0.287543	0.0369221	-0.190584	0.13338
pseudo_1106	0.185815	0.674398	-0.0579592	0.528578	0.0602994	0.833621
pseudo_1107	0.0649029	0.952995	0.0672744	0.238428	-0.222908	0.479346
pseudo_1108	-0.144744	0.528578	-0.0707484	0.462213	-0.0971938	0.528578
pseudo_1109	0.119263	0.797786	0.0392197	0.53379	0.0318554	0.741841
pseudo_111	0.208437	0.59948	0.201101	0.141449	-0.161481	0.344522
pseudo_1110	-0.409539	0.153444	0.0191682	0.854791	0.0172435	0.970802
pseudo_1111	0.0767532	1	0.0189498	1	-0.0933245	0.59948
pseudo_1112	0.0957493	0.970802	-0.0618298	0.486783	-0.0314113	0.912564
pseudo_1114	0.361897	0.247956	-0.0533925	0.59948	-0.151302	0.400775
pseudo_1115	0.149135	0.637281	0.0312869	0.768231	-0.0567942	0.555607
pseudo_1118	0.383888	0.20754	0.137574	0.20754	0.121703	0.528578
pseudo_1119	-0.47965	0.247956	0.0915169	0.462213	-0.194144	0.247956
pseudo_112	0.0240344	0.833621	0.043371	0.916352	-0.0381303	0.916352
pseudo_1120	-0.144744	0.528578	-0.0707484	0.462213	-0.0971938	0.528578
pseudo_1121	-0.840279	0.172131	0.0492314	0.833621	0.579265	0.115153
pseudo_1124	-0.0753715	0.674398	0.0773784	0.752694	-0.0439485	0.833621
pseudo_1125	0.62086	0.172131	-0.100742	0.400775	-0.00852611	1
pseudo_1126	-0.0604681	0.752694	0.0941736	0.293581	-0.00466969	0.916352
pseudo_1127	0.130795	0.797786	0.0759099	0.399876	-0.115341	0.360167
pseudo_1131	0.140716	0.741841	-0.0769614	0.360167	0.110052	0.399876
pseudo_1133	0.104996	0.970802	-0.182901	0.0853803	0.0435578	0.741841
pseudo_1134	-0.0753715	0.674398	0.0773784	0.752694	-0.0439485	0.833621
pseudo_1135	-0.0659393	0.970802	-0.146359	0.854791	0.136624	0.288484
pseudo_1136	0.150714	0.582986	0.0203906	0.741841	-0.0779857	0.6342
pseudo_1138	0.361897	0.247956	-0.0533925	0.59948	-0.151302	0.400775
pseudo_1139	0.0240344	0.833621	0.043371	0.916352	-0.0381303	0.916352
pseudo_1140	0.131284	0.741841	-0.0195047	0.687228	-0.0165126	0.854791
pseudo_1141	-0.840279	0.172131	0.0492314	0.833621	0.579265	0.115153
pseudo_1142	0.344075	0.344522	0.0842365	0.59948	-0.203536	0.20754
pseudo_1146	0.0240344	0.833621	0.043371	0.916352	-0.0381303	0.916352
pseudo_1147	-0.897583	0.115153	-0.120971	0.293581	-0.417701	0.141449
pseudo_1149	-0.840279	0.172131	0.0492314	0.833621	0.579265	0.115153
pseudo_115	-0.450374	0.227101	0.0717025	0.360167	0.287298	0.227101
pseudo_1153	0.150824	0.979916	0.0298303	0.899832	0.0767231	0.435144
pseudo_1154	0.333074	0.360167	-0.105865	0.200171	-0.128596	0.360167
pseudo_1156	-0.897583	0.0255454	-0.120971	0.13338	-0.417701	0.0369221
pseudo_1158	0.62086	0.172131	-0.100742	0.400775	-0.00852611	1
pseudo_1159	0.383888	0.20754	0.137574	0.20754	0.121703	0.528578
pseudo_1160	0.552237	0.0619443	0.0191742	0.854791	0.119792	0.741841
pseudo_1161	-0.37626	0.344522	0.194329	0.172131	0.504007	0.141449
pseudo_1162	-0.0089705	0.741841	-0.0522993	0.912564	0.0535691	0.6342
pseudo_1163	0.315645	0.400775	0.0134759	1	-0.659384	0.115153
pseudo_1164	-0.515766	0.20754	-0.430292	0.115153	0.151545	0.400775
pseudo_1166	-0.0458202	0.6342	0.0555423	0.486783	-0.0931912	0.486783
pseudo_1167	0.383888	0.20754	0.137574	0.20754	0.121703	0.528578
pseudo_1168	0.197143	0.53379	-0.0550714	0.687228	0.144241	0.256519
pseudo_1169	0.142595	0.687228	0.110025	0.288484	-0.127403	0.288484
pseudo_117	-0.0259459	0.813625	0.0328797	0.679925	-0.000683601	0.953002
pseudo_1170	-0.253911	0.256519	0.0194772	0.741841	0.0677866	0.6342
pseudo_1171	-0.659965	0.0728945	0.0703742	0.486783	0.19256	0.797786
pseudo_1173	0.272744	0.53379	-0.011682	0.741841	-0.0262373	0.912564
pseudo_1176	-0.0604681	0.752694	0.0941736	0.293581	-0.00466969	0.916352
pseudo_1177	0.106476	0.916352	0.0783309	0.674398	0.288117	0.20754
pseudo_1178	0.162994	0.443561	-0.131153	0.51678	0.0882404	0.376659
pseudo_1179	0.208437	0.59948	0.201101	0.141449	-0.161481	0.344522
pseudo_118	-0.144744	0.528578	-0.0707484	0.462213	-0.0971938	0.528578
pseudo_1182	-0.37626	0.344522	0.194329	0.172131	0.504007	0.141449
pseudo_1183	0.298994	0.462213	-0.0157343	0.916352	0.0683805	0.752694
pseudo_1186	-0.480745	0.059293	0.0551645	0.479408	-0.00225065	0.813625
pseudo_1187	-0.37626	0.344522	0.194329	0.172131	0.504007	0.141449
pseudo_1188	0.17664	0.6342	-0.112495	0.200171	0.0178035	0.912564
pseudo_1189	0.298994	0.462213	-0.0157343	0.916352	0.0683805	0.752694
pseudo_1190	-0.339428	0.400775	-0.0531805	0.674398	0.228631	0.247956
pseudo_1193	-0.0753715	0.674398	0.0773784	0.752694	-0.0439485	0.833621
pseudo_1194	-0.840279	0.172131	0.0492314	0.833621	0.579265	0.115153
pseudo_1195	0.223056	0.528578	-0.287543	0.141449	-0.190584	0.293581
pseudo_1196	-0.0164222	0.687228	-0.0606969	0.53379	0.0339297	0.854791
pseudo_1197	0.298994	0.462213	-0.0157343	0.916352	0.0683805	0.752694
pseudo_1199	0.0425271	0.916352	-0.198772	0.20754	0.111808	0.59948
pseudo_12	0.184837	0.752694	0.13287	0.247956	-0.137357	0.462213
pseudo_120	0.146146	0.687228	0.0101859	0.912564	0.174208	0.288484
pseudo_1200	0.00726996	0.953002	0.0156779	1	-0.26441	0.157212
pseudo_1201	0.474943	0.200171	0.130309	0.797786	0.073495	0.53379
pseudo_1202	0.0552218	0.970802	0.00970962	0.854791	0.00817546	0.970802
pseudo_1203	-0.0604681	0.752694	0.0941736	0.293581	-0.00466969	0.916352
pseudo_1204	0.35176	0.293581	0.0886294	0.528578	0.176675	0.293581
pseudo_1205	0.101427	0.854791	-0.113838	0.32303	-0.256399	0.582986
pseudo_1206	0.160787	0.555607	0.05501	0.409297	0.0506658	0.595806
pseudo_1207	0.185306	0.479346	0.0347768	0.906153	-0.454239	0.0517479
pseudo_1209	0.223056	0.528578	-0.287543	0.141449	-0.190584	0.293581
pseudo_1211	0.106476	0.916352	0.0783309	0.674398	0.288117	0.20754
pseudo_1212	0.223056	0.528578	-0.287543	0.141449	-0.190584	0.293581
pseudo_1213	0.315645	0.400775	0.0134759	1	-0.659384	0.115153
pseudo_1214	0.208437	0.59948	0.201101	0.141449	-0.161481	0.344522
pseudo_1216	-0.0677876	0.912564	0.0878767	0.360167	-0.19884	0.0853803
pseudo_1218	-0.0753715	0.674398	0.0773784	0.752694	-0.0439485	0.833621
pseudo_1219	-0.248102	0.797786	0.0667339	0.582986	0.187864	0.854791
pseudo_122	-0.0202167	0.970802	-0.0344574	0.687228	0.148506	0.288484
pseudo_1220	-0.339428	0.400775	-0.0531805	0.674398	0.228631	0.247956
pseudo_1221	-0.218364	0.360167	0.144251	0.0853803	0.249669	0.256519
pseudo_1222	0.0213756	0.768231	0.0351642	0.768231	-0.0908938	0.376659
pseudo_1225	-0.398876	0.288484	-0.0747704	0.486783	0.345536	0.133439
pseudo_1226	0.401938	0.0676883	-0.147226	0.0988892	-0.116804	0.288743
pseudo_1227	0.383888	0.20754	0.137574	0.20754	0.121703	0.528578
pseudo_1228	0.0425271	0.916352	-0.198772	0.20754	0.111808	0.59948
pseudo_1229	0.383888	0.20754	0.137574	0.20754	0.121703	0.528578
pseudo_123	0.35176	0.293581	0.0886294	0.528578	0.176675	0.293581
pseudo_1230	0.184837	0.752694	0.13287	0.247956	-0.137357	0.462213
pseudo_1231	0.344075	0.344522	0.0842365	0.59948	-0.203536	0.20754
pseudo_1232	0.223056	0.528578	-0.287543	0.141449	-0.190584	0.293581
pseudo_1233	0.742577	0.141449	0.0917408	0.400775	0.390886	0.172131
pseudo_1235	-0.144744	0.360094	-0.0707484	0.28841	-0.0971938	0.360094
pseudo_1236	-0.0380386	0.912564	-0.0182225	0.797786	-0.292204	0.442108
pseudo_1237	0.482817	0.133439	-0.0979011	0.687228	0.100151	0.854791
pseudo_1238	-0.294694	0.14063	0.0777612	0.288743	0.213193	0.215828
pseudo_1239	0.372826	0.194757	0.041937	0.51678	0.0682377	0.859655
pseudo_1240	-0.37626	0.344522	0.194329	0.172131	0.504007	0.141449
pseudo_1243	-0.0303074	0.970802	0.103903	0.360167	-0.0776885	0.970802
pseudo_1247	-0.124607	0.859655	-0.0445111	0.555607	0.207651	0.288743
pseudo_1248	0.301489	0.26279	0.0258892	0.679925	-0.072244	0.555607
pseudo_1249	-0.339428	0.400775	-0.0531805	0.674398	0.228631	0.247956
pseudo_125	-0.897583	0.115153	-0.120971	0.293581	-0.417701	0.141449
pseudo_1250	0.0240344	0.833621	0.043371	0.916352	-0.0381303	0.916352
pseudo_1251	-0.277511	0.256519	0.0844477	0.442108	-0.119046	0.32303
pseudo_1252	0.298994	0.462213	-0.0157343	0.916352	0.0683805	0.752694
pseudo_1253	0.185815	0.674398	-0.0579592	0.528578	0.0602994	0.833621
pseudo_1255	0.0112347	0.854791	-0.0532865	0.486783	0.0386647	0.854791
pseudo_1256	0.0240344	0.833621	0.043371	0.916352	-0.0381303	0.916352
pseudo_1257	0.167464	0.833621	-0.167031	0.247956	-0.0246924	1
pseudo_1258	0.106476	0.916352	0.0783309	0.674398	0.288117	0.20754
pseudo_126	0.344075	0.344522	0.0842365	0.59948	-0.203536	0.20754
pseudo_1263	-0.211088	0.376659	-0.00654092	0.859655	0.0315955	0.906166
pseudo_1265	0.742577	0.141449	0.0917408	0.400775	0.390886	0.172131
pseudo_1267	0.333702	0.175651	0.0510527	0.687228	-0.241355	0.741841
pseudo_1268	-0.330255	0.175651	-0.25052	0.099541	0.0271755	0.912564
pseudo_1269	0.315645	0.400775	0.0134759	1	-0.659384	0.115153
pseudo_127	0.325377	0.200171	0.0364476	0.741841	0.122528	0.32303
pseudo_1271	0.0931015	0.912564	-0.128443	0.288484	0.107483	0.442108
pseudo_1273	-0.515766	0.20754	-0.430292	0.115153	0.151545	0.400775
pseudo_1274	0.184837	0.752694	0.13287	0.247956	-0.137357	0.462213
pseudo_1275	-0.840279	0.172131	0.0492314	0.833621	0.579265	0.115153
pseudo_1277	-0.0629333	0.53379	-0.0533187	0.854791	0.00937503	0.970802
pseudo_1278	0.106476	0.916352	0.0783309	0.674398	0.288117	0.20754
pseudo_1283	0.315645	0.400775	0.0134759	1	-0.659384	0.115153
pseudo_1284	0.114171	0.854791	-0.128366	0.175651	0.0860537	0.582986
pseudo_1285	-0.0639453	0.970802	0.0900732	0.32303	-0.00873455	0.970802
pseudo_1286	0.184837	0.752694	0.13287	0.247956	-0.137357	0.462213
pseudo_1287	-0.282775	0.51678	-0.0510799	0.479408	-0.00280391	1
pseudo_1288	0.298994	0.462213	-0.0157343	0.916352	0.0683805	0.752694
pseudo_1289	0.10505	0.813625	-0.125732	0.194757	-0.0864082	0.443561
pseudo_129	0.131284	0.741841	-0.0195047	0.687228	-0.0165126	0.854791
pseudo_1290	-0.112791	0.59948	-0.241152	0.172131	0.146585	0.462213
pseudo_1291	-0.0604681	0.752694	0.0941736	0.293581	-0.00466969	0.916352
pseudo_1292	0.0767532	1	0.0189498	1	-0.0933245	0.59948
pseudo_1296	0.333603	0.486783	0.0845596	0.399876	0.173469	0.442108
pseudo_1297	0.0240344	0.833621	0.043371	0.916352	-0.0381303	0.916352
pseudo_1298	-0.365575	0.175651	-0.0515507	0.582986	0.151803	0.256519
pseudo_1299	0.383888	0.20754	0.137574	0.20754	0.121703	0.528578
pseudo_13	0.227899	0.26279	-0.043673	0.953002	-0.0540686	0.595806
pseudo_130	0.0478232	0.970802	-0.0200255	0.970802	-0.00744761	0.912564
pseudo_1301	-0.473083	0.175651	0.0153558	0.970802	-0.0648448	0.687228
pseudo_1304	0.202212	0.486783	-0.126082	0.200171	-0.0197469	0.854791
pseudo_1305	0.0240344	0.833621	0.043371	0.916352	-0.0381303	0.916352
pseudo_1306	-0.240333	0.409297	-0.0435304	0.595806	0.199249	0.376659
pseudo_1307	-0.112813	0.781812	0.0412148	0.378192	-0.175215	0.13741
pseudo_1310	0.0767532	1	0.0189498	1	-0.0933245	0.59948
pseudo_1311	0.0767532	1	0.0189498	1	-0.0933245	0.59948
pseudo_1313	0.221497	0.6342	0.187234	0.442108	0.200157	0.133439
pseudo_1314	0.0425271	0.916352	-0.198772	0.20754	0.111808	0.59948
pseudo_1315	0.35176	0.293581	0.0886294	0.528578	0.176675	0.293581
pseudo_1316	-0.339428	0.400775	-0.0531805	0.674398	0.228631	0.247956
pseudo_1318	-0.0615533	0.582986	-0.00942685	0.970802	-0.170862	0.200171
pseudo_1321	0.474943	0.200171	0.130309	0.797786	0.073495	0.53379
pseudo_1322	-0.112791	0.59948	-0.241152	0.172131	0.146585	0.462213
pseudo_1323	0.208437	0.59948	0.201101	0.141449	-0.161481	0.344522
pseudo_1324	-0.171462	0.345677	-0.111321	0.51678	0.00475727	1
pseudo_1325	0.502739	0.115515	0.0700524	0.970802	-0.00945058	0.970802
pseudo_1327	-0.339428	0.400775	-0.0531805	0.674398	0.228631	0.247956
pseudo_1328	0.244183	0.26279	0.00717277	1	-0.0761199	0.443561
pseudo_1329	0.62086	0.172131	-0.100742	0.400775	-0.00852611	1
pseudo_133	0.157457	0.6342	0.139716	0.175651	0.0633181	0.854791
pseudo_1330	-0.000464722	0.741841	-0.0374479	0.912564	-0.0588752	0.741841
pseudo_1331	-0.34208	0.153444	-0.169079	0.687228	0.0292435	0.797786
pseudo_1333	-0.339428	0.400775	-0.0531805	0.674398	0.228631	0.247956
pseudo_1334	0.475507	0.153444	0.146421	0.099541	0.114703	0.797786
pseudo_1338	0.0235833	0.953002	0.0529869	0.409297	-0.0228497	0.813625
pseudo_1339	-0.188779	0.595806	-0.0131561	0.813625	0.280896	0.111537
pseudo_134	0.185815	0.674398	-0.0579592	0.528578	0.0602994	0.833621
pseudo_1340	0.0112347	0.854791	-0.0532865	0.486783	0.0386647	0.854791
pseudo_1341	-0.840279	0.172131	0.0492314	0.833621	0.579265	0.115153
pseudo_1345	0.563248	0.0728945	0.255942	0.133439	-0.0159268	0.854791
pseudo_1346	0.0452872	1	-0.110989	0.344522	-0.248667	0.172131
pseudo_1347	0.202212	0.486783	-0.126082	0.200171	-0.0197469	0.854791
pseudo_1348	0.62086	0.172131	-0.100742	0.400775	-0.00852611	1
pseudo_1352	0.35176	0.293581	0.0886294	0.528578	0.176675	0.293581
pseudo_1353	0.0738425	0.912564	-0.105082	0.442108	-0.117266	0.360167
pseudo_1355	0.360977	0.399876	0.260911	0.0619443	0.0835064	0.442108
pseudo_1356	0.402848	0.227101	0.0160638	0.854791	-0.0729417	0.6342
pseudo_1357	-0.870795	0.141449	-0.0466668	0.833621	-0.0857411	0.752694
pseudo_1358	-0.507769	0.133439	-0.0587076	0.486783	-0.0914674	0.486783
pseudo_136	-0.102606	0.486783	0.0117126	0.854791	-0.0509317	0.741841
pseudo_1363	0.782422	0.115153	0.427648	0.115153	0.171683	0.344522
pseudo_1364	-0.144744	0.528578	-0.0707484	0.462213	-0.0971938	0.528578
pseudo_1365	0.1223	0.797786	0.0467935	0.741841	0.247741	0.288484
pseudo_1366	0.018275	0.953002	0.0299871	0.859655	0.0424833	0.813625
pseudo_1367	-0.112791	0.59948	-0.241152	0.172131	0.146585	0.462213
pseudo_1368	0.344075	0.344522	0.0842365	0.59948	-0.203536	0.20754
pseudo_1369	-0.204645	0.442108	-0.175981	0.442108	0.219831	0.133439
pseudo_137	0.242405	0.399876	-0.0368467	0.582986	0.06434	0.687228
pseudo_1370	0.782422	0.115153	0.427648	0.115153	0.171683	0.344522
pseudo_1372	0.194681	0.53379	-0.0133761	0.797786	-0.226101	0.0619443
pseudo_1374	-0.37626	0.344522	0.194329	0.172131	0.504007	0.141449
pseudo_1375	-0.00702346	0.906166	0.00832996	0.953002	-0.000694157	1
pseudo_1376	-0.0753715	0.674398	0.0773784	0.752694	-0.0439485	0.833621
pseudo_1379	0.296849	0.345677	0.129005	0.0517807	0.0749119	0.768231
pseudo_138	-0.256848	0.854791	0.00830175	0.912564	-0.147999	0.582986
pseudo_1380	0.0425271	0.916352	-0.198772	0.20754	0.111808	0.59948
pseudo_1381	-0.897583	0.115153	-0.120971	0.293581	-0.417701	0.141449
pseudo_1384	0.35176	0.293581	0.0886294	0.528578	0.176675	0.293581
pseudo_1385	0.315645	0.400775	0.0134759	1	-0.659384	0.115153
pseudo_1386	0.463707	0.200171	0.112305	0.153444	0.126764	0.687228
pseudo_1387	-0.0615533	0.582986	-0.00942685	0.970802	-0.170862	0.200171
pseudo_1388	0.102292	0.859655	0.0136104	0.906166	-0.159783	0.125427
pseudo_1389	0.185815	0.674398	-0.0579592	0.528578	0.0602994	0.833621
pseudo_139	0.234048	0.443561	0.00760868	0.906166	0.229299	0.0988892
pseudo_1391	0.315645	0.400775	0.0134759	1	-0.659384	0.115153
pseudo_1392	-0.0430563	0.768231	-0.0166143	1	0.0917644	0.906166
pseudo_1393	-0.339428	0.400775	-0.0531805	0.674398	0.228631	0.247956
pseudo_1394	-0.897583	0.115153	-0.120971	0.293581	-0.417701	0.141449
pseudo_1396	0.000854874	0.953002	-0.0533546	0.595806	0.121153	0.238494
pseudo_1398	0.742577	0.141449	0.0917408	0.400775	0.390886	0.172131
pseudo_1399	0.383888	0.20754	0.137574	0.20754	0.121703	0.528578
pseudo_14	-0.870795	0.141449	-0.0466668	0.833621	-0.0857411	0.752694
pseudo_140	-0.515766	0.20754	-0.430292	0.115153	0.151545	0.400775
pseudo_1400	0.0738425	0.912564	-0.105082	0.442108	-0.117266	0.360167
pseudo_1402	0.219325	0.399876	-0.0172214	0.741841	-0.122313	0.32303
pseudo_1403	-0.0604681	0.752694	0.0941736	0.293581	-0.00466969	0.916352
pseudo_1405	-0.0202167	0.970802	-0.0344574	0.687228	0.148506	0.288484
pseudo_1408	0.185815	0.674398	-0.0579592	0.528578	0.0602994	0.833621
pseudo_1409	-0.112791	0.59948	-0.241152	0.172131	0.146585	0.462213
pseudo_141	-0.397021	0.32303	-0.0138585	0.912564	-0.0895328	0.53379
pseudo_1410	0.298994	0.462213	-0.0157343	0.916352	0.0683805	0.752694
pseudo_1411	-0.183844	0.360167	-0.00327497	0.912564	0.0184226	0.854791
pseudo_1412	-0.515766	0.20754	-0.430292	0.115153	0.151545	0.400775
pseudo_1413	0.184837	0.752694	0.13287	0.247956	-0.137357	0.462213
pseudo_1414	0.782422	0.115153	0.427648	0.115153	0.171683	0.344522
pseudo_1415	0.0425271	0.916352	-0.198772	0.20754	0.111808	0.59948
pseudo_1417	0.185815	0.674398	-0.0579592	0.528578	0.0602994	0.833621
pseudo_1419	-0.323869	0.582986	-0.167105	0.227101	-0.138162	0.32303
pseudo_1420	0.35176	0.293581	0.0886294	0.528578	0.176675	0.293581
pseudo_1421	-0.382159	0.360167	0.015832	0.912564	0.101188	0.53379
pseudo_1424	-0.00271679	0.906166	0.107312	0.238494	0.087447	1
pseudo_1425	-0.187895	0.345677	-0.090044	0.26279	0.0929714	0.376659
pseudo_1428	-0.0604681	0.752694	0.0941736	0.293581	-0.00466969	0.916352
pseudo_1429	0.782422	0.115153	0.427648	0.115153	0.171683	0.344522
pseudo_1431	-0.0604681	0.752694	0.0941736	0.293581	-0.00466969	0.916352
pseudo_1434	-0.0753715	0.674398	0.0773784	0.752694	-0.0439485	0.833621
pseudo_1435	-0.144744	0.528578	-0.0707484	0.462213	-0.0971938	0.528578
pseudo_1436	-0.124967	0.970802	-0.0737046	0.442108	-0.0471336	0.854791
pseudo_1438	-0.761381	0.0133089	-0.19931	0.0988892	-0.117299	0.595806
pseudo_1439	0.35176	0.293581	0.0886294	0.528578	0.176675	0.293581
pseudo_1441	-0.123395	0.479408	0.100588	0.194757	-0.12515	0.215828
pseudo_1442	-0.0511085	0.582986	-0.13476	0.153444	0.0073071	0.970802
pseudo_1443	-0.339428	0.400775	-0.0531805	0.674398	0.228631	0.247956
pseudo_1446	0.215747	0.399876	-0.0432211	0.970802	-0.176032	0.153444
pseudo_1447	0.62086	0.172131	-0.100742	0.400775	-0.00852611	1
pseudo_1448	-0.515766	0.20754	-0.430292	0.115153	0.151545	0.400775
pseudo_145	0.383888	0.20754	0.137574	0.20754	0.121703	0.528578
pseudo_1450	0.106476	0.916352	0.0783309	0.674398	0.288117	0.20754
pseudo_1451	0.254035	0.582986	-0.170947	0.115515	0.0690296	0.582986
pseudo_1453	0.0767532	1	0.0189498	1	-0.0933245	0.59948
pseudo_1454	0.383888	0.20754	0.137574	0.20754	0.121703	0.528578
pseudo_1455	0.742577	0.141449	0.0917408	0.400775	0.390886	0.172131
pseudo_1456	-0.0511085	0.582986	-0.13476	0.153444	0.0073071	0.970802
pseudo_1458	-0.37626	0.344522	0.194329	0.172131	0.504007	0.141449
pseudo_1459	-0.515766	0.20754	-0.430292	0.115153	0.151545	0.400775
pseudo_146	0.226233	0.687228	-0.00430375	0.970802	-0.050792	0.797786
pseudo_1463	0.403338	0.200171	-0.0793508	0.288484	0.0258866	0.854791
pseudo_1464	0.298994	0.462213	-0.0157343	0.916352	0.0683805	0.752694
pseudo_1465	-0.168394	0.462213	0.0921349	0.344522	-0.0930579	0.674398
pseudo_1468	0.104435	0.970802	0.0881205	0.360167	-0.0877438	0.53379
pseudo_147	0.298994	0.462213	-0.0157343	0.916352	0.0683805	0.752694
pseudo_1470	-0.897583	0.115153	-0.120971	0.293581	-0.417701	0.141449
pseudo_1472	0.184837	0.752694	0.13287	0.247956	-0.137357	0.462213
pseudo_1473	-0.0202167	0.970802	-0.0344574	0.687228	0.148506	0.288484
pseudo_1476	-0.515766	0.20754	-0.430292	0.115153	0.151545	0.400775
pseudo_1477	0.742577	0.141449	0.0917408	0.400775	0.390886	0.172131
pseudo_1478	0.223056	0.528578	-0.287543	0.141449	-0.190584	0.293581
pseudo_1479	0.516732	0.0192033	0.0925597	0.199113	0.0342671	0.562525
pseudo_148	-0.897583	0.115153	-0.120971	0.293581	-0.417701	0.141449
pseudo_1480	0.30732	0.256519	-0.00112916	0.912564	-0.295502	0.399876
pseudo_1481	0.0525469	0.970802	-0.265517	0.0853803	0.0715094	0.53379
pseudo_1483	-0.183844	0.360167	-0.00327497	0.912564	0.0184226	0.854791
pseudo_1484	-0.47965	0.247956	0.0915169	0.462213	-0.194144	0.247956
pseudo_1485	0.742577	0.141449	0.0917408	0.400775	0.390886	0.172131
pseudo_1486	0.742577	0.141449	0.0917408	0.400775	0.390886	0.172131
pseudo_1487	0.0222301	0.797786	0.0421969	0.582986	0.175167	0.200171
pseudo_1488	-0.342979	0.442108	0.0431016	0.53379	-0.111549	0.442108
pseudo_149	0.141803	0.687228	0.089205	0.256519	-0.104103	0.442108
pseudo_1490	-0.0753715	0.674398	0.0773784	0.752694	-0.0439485	0.833621
pseudo_1491	0.0425271	0.916352	-0.198772	0.20754	0.111808	0.59948
pseudo_1492	0.303472	0.175651	-0.0749844	0.912564	-0.0344406	0.797786
pseudo_1493	0.35176	0.293581	0.0886294	0.528578	0.176675	0.293581
pseudo_1494	0.344075	0.344522	0.0842365	0.59948	-0.203536	0.20754
pseudo_1496	0.185815	0.674398	-0.0579592	0.528578	0.0602994	0.833621
pseudo_1497	0.315645	0.400775	0.0134759	1	-0.659384	0.115153
pseudo_1498	0.167464	0.833621	-0.167031	0.247956	-0.0246924	1
pseudo_1499	0.315645	0.400775	0.0134759	1	-0.659384	0.115153
pseudo_15	0.184837	0.752694	0.13287	0.247956	-0.137357	0.462213
pseudo_1501	0.0767532	1	0.0189498	1	-0.0933245	0.59948
pseudo_1502	-0.268233	0.227101	-0.0603347	0.442108	-0.0111091	0.912564
pseudo_1503	0.167464	0.833621	-0.167031	0.247956	-0.0246924	1
pseudo_1504	-0.870795	0.141449	-0.0466668	0.833621	-0.0857411	0.752694
pseudo_1505	0.0346608	0.854791	-0.0338088	0.582986	-0.143398	0.288484
pseudo_1506	-0.0604681	0.752694	0.0941736	0.293581	-0.00466969	0.916352
pseudo_1507	-0.248102	0.797786	0.0667339	0.582986	0.187864	0.854791
pseudo_1508	0.742577	0.141449	0.0917408	0.400775	0.390886	0.172131
pseudo_151	-0.840279	0.172131	0.0492314	0.833621	0.579265	0.115153
pseudo_1512	0.223056	0.528578	-0.287543	0.141449	-0.190584	0.293581
[truncated: 734 more rows]
